# Supplementary material for: Genes Associated with Bicalutamide and Zoladex Effects in Benign Prostatic Hyperplasia via Transcriptomic and Network Pharmacology Analyses
Source: Research Square preprint supplement (doi:10.21203/rs.3.rs-6957357/v1), 2025-07-14
Supplement: Supplementary file 1 [file 079e9a0e290a4bd5acf5da77.docx]

| **Name** | **Vender** | **Art.No.(article number)** | **Reaction species** | **Dilution ratio** | **Diluent** |
| --- | --- | --- | --- | --- | --- |
| NQO1 | Affinity | DF6437 | Human, Mouse, Rat | 1:50 | 2%BSA |
| CLPP | Servicebio | GB113918 | Human, Mouse, Rat | 1:500 | 2%BSA |
| HMGCR | Affinity | DF6518 | Human, Mouse, Rat | 1:50 | 2%BSA |
| SORD | Affinity | DF6842 | Human, Mouse, Rat | 1:50 | 2%BSA |

**The antibody information of key genes**
