# Supplementary material for: Genes Associated with Bicalutamide and Zoladex Effects in Benign Prostatic Hyperplasia via Transcriptomic and Network Pharmacology Analyses
Source: Research Square preprint supplement (doi:10.21203/rs.3.rs-6957357/v1), 2025-07-14
Supplement: Supplementary file 2 [file 872f47fc24865004808ce5a5.xlsx]

## Sheet: NQO1
	ID	Description	setSize	enrichmentScore	NES	pvalue	p.adjust	qvalue	rank	leading_edge	core_enrichment
KEGG_PARKINSONS_DISEASE	KEGG_PARKINSONS_DISEASE	KEGG_PARKINSONS_DISEASE	96	0.52703029003429	2.8982918991914	7.62445387761674e-17	1.35715279021578e-14	8.98882983466394e-15	5537	tags=71%, list=26%, signal=53%	NDUFB1/COX6A1/NDUFC2/NDUFV2/UBE2G1/NDUFS3/UBE2J1/UBE2L3/UQCR10/NDUFB10/NDUFB6/NDUFB4/NDUFV3/NDUFA6/UBA1/NDUFA1/UQCRFS1/COX5A/NDUFC1/SDHC/PINK1/NDUFAB1/COX7B/NDUFB3/NDUFA2/SDHA/COX7A2/SLC25A4/NDUFS1/COX7A2L/CYC1/NDUFA7/COX5B/NDUFB9/NDUFA10/COX4I2/COX6B1/NDUFS2/SLC25A5/SDHB/UQCRH/SNCA/UBE2L6/NDUFB2/NDUFA8/COX8A/NDUFS6/CYCS/COX7C/UQCRC1/NDUFB8/NDUFB5/PARK7/NDUFS5/UQCRC2/APAF1/HTRA2/COX6A2/UQCR11/NDU…
KEGG_HUNTINGTONS_DISEASE	KEGG_HUNTINGTONS_DISEASE	KEGG_HUNTINGTONS_DISEASE	156	0.443145244328188	2.56650959477976	5.64316224212574e-16	5.02241439549191e-14	3.32649563746359e-14	7690	tags=72%, list=36%, signal=46%	NDUFB1/TBPL1/COX6A1/NDUFC2/NDUFV2/NDUFS3/UQCR10/NDUFB10/CREB3L2/NDUFB6/NDUFB4/NDUFV3/NDUFA6/NDUFA1/UQCRFS1/POLR2C/COX5A/NDUFC1/CLTC/SDHC/NDUFAB1/COX7B/NDUFB3/AP2A2/EP300/POLR2E/NDUFA2/SDHA/COX7A2/AP2S1/HDAC2/SOD1/SLC25A4/DNAL1/CREB3L4/NDUFS1/TFAM/COX7A2L/CYC1/NDUFA7/DNALI1/COX5B/NDUFB9/NDUFA10/COX4I2/COX6B1/NDUFS2/SLC25A5/SDHB/DCTN4/UQCRH/POLR2G/PLCB1/PLCB4/NDUFB2/NDUFA8/POLR2H/COX8A/NDUFS6/CYCS/…
KEGG_OXIDATIVE_PHOSPHORYLATION	KEGG_OXIDATIVE_PHOSPHORYLATION	KEGG_OXIDATIVE_PHOSPHORYLATION	99	0.476589848000677	2.62990853155276	8.20781136363518e-13	4.86996807575687e-11	3.22552586921804e-11	5340	tags=65%, list=25%, signal=49%	NDUFB1/COX6A1/NDUFC2/NDUFV2/COX17/NDUFS3/UQCR10/NDUFB10/PPA2/ATP6V1A/NDUFB6/NDUFB4/NDUFV3/NDUFA6/NDUFA1/UQCRFS1/COX5A/NDUFC1/SDHC/NDUFAB1/COX7B/NDUFB3/ATP6V1G1/ATP6AP1/NDUFA2/SDHA/ATP6V1H/COX7A2/ATP6V1D/ATP6V1F/ATP6V1B2/NDUFS1/COX7A2L/CYC1/NDUFA7/COX5B/NDUFB9/NDUFA10/COX4I2/COX6B1/NDUFS2/ATP6V0A1/SDHB/UQCRH/ATP6V0B/NDUFB2/NDUFA8/COX8A/NDUFS6/COX7C/NDUFA11/UQCRC1/NDUFB8/NDUFB5/NDUFS5/UQCRC2/ATP6V0…
KEGG_SPLICEOSOME	KEGG_SPLICEOSOME	KEGG_SPLICEOSOME	118	0.439259789574809	2.46934275304938	3.01693277656388e-12	1.34253508557093e-10	8.89201239408301e-11	9207	tags=83%, list=43%, signal=47%	TXNL4A/PRPF18/SRSF5/WBP11/SNRPD1/SF3B6/SNRPB/SF3A1/PUF60/PLRG1/PPIH/DHX15/CRNKL1/NCBP2/SNRPC/NCBP1/LSM4/SRSF8/PCBP1/HNRNPC/EIF4A3/LSM8/HNRNPK/HSPA8/HNRNPU/U2SURP/SRSF6/BCAS2/DDX46/LSM3/MAGOH/SNRNP27/DHX16/U2AF1/PRPF31/CWC15/CDC5L/SNRPD3/SF3B5/SNRPG/PRPF6/SNRPE/PRPF8/ZMAT2/SRSF7/DHX38/TCERG1/SF3B3/SNRNP40/SRSF3/LSM5/CDC40/SF3B1/AQR/SNW1/SRSF1/HNRNPM/BUD31/PRPF19/THOC1/PRPF4/DDX5/SNRNP70/TRA2B/DDX4…
KEGG_ALZHEIMERS_DISEASE	KEGG_ALZHEIMERS_DISEASE	KEGG_ALZHEIMERS_DISEASE	141	0.406062475539669	2.32314899879301	5.99548556542816e-11	2.13439286129243e-09	1.41367238595359e-09	5448	tags=58%, list=26%, signal=44%	NDUFB1/COX6A1/NDUFC2/NDUFV2/NDUFS3/UQCR10/NDUFB10/NDUFB6/NDUFB4/NDUFV3/NDUFA6/ADAM10/NDUFA1/UQCRFS1/COX5A/NDUFC1/SDHC/NDUFAB1/COX7B/NDUFB3/NCSTN/NDUFA2/SDHA/CASP7/COX7A2/PSEN2/CHP1/EIF2AK3/NDUFS1/MAPK1/COX7A2L/CYC1/NDUFA7/CALM1/COX5B/NDUFB9/NDUFA10/GSK3B/COX4I2/COX6B1/NDUFS2/SDHB/IDE/BAD/UQCRH/PLCB1/MAPK3/PLCB4/SNCA/NDUFB2/NDUFA8/COX8A/NDUFS6/CYCS/COX7C/FADD/ERN1/UQCRC1/NDUFB8/NDUFB5/NDUFS5/UQCRC…
KEGG_PROTEASOME	KEGG_PROTEASOME	KEGG_PROTEASOME	40	0.599158124916169	2.82587168680693	8.27239721235905e-11	2.45414450633319e-09	1.62545348734073e-09	6458	tags=85%, list=30%, signal=59%	PSMD8/PSMD12/PSMA3/PSMA5/PSMD14/PSMD3/PSMB5/POMP/PSMA1/PSMB2/PSMD6/PSMB1/PSMB7/PSMD7/PSMA7/PSMA2/PSMD11/PSMC5/PSMA4/PSMC2/PSMB6/PSMD4/PSMD1/PSMF1/PSMC4/PSMB3/PSME1/PSME3/PSMB4/PSMB8/PSMD13/PSMC1/PSMD2/PSMC6
KEGG_UBIQUITIN_MEDIATED_PROTEOLYSIS	KEGG_UBIQUITIN_MEDIATED_PROTEOLYSIS	KEGG_UBIQUITIN_MEDIATED_PROTEOLYSIS	127	0.404552703875574	2.28981736580671	3.91839326404238e-10	9.96391429999349e-09	6.59939918154507e-09	8494	tags=73%, list=40%, signal=44%	UBE2G1/UBE2J1/UBE2L3/UBA1/NEDD4L/RBX1/UBE2E1/ANAPC11/CUL5/TRIM37/UBE2N/FZR1/ANAPC13/UBE2K/BIRC6/WWP1/SMURF1/UBR5/ANAPC5/ANAPC10/RCHY1/UBE2D4/UBE2M/UBE4A/HERC2/PPIL2/KLHL9/UBE4B/UBE2S/BIRC2/UBE2Q2/CUL4A/UBE2H/UBE2Z/CUL3/RNF7/DDB1/UBE3B/TRIP12/CDC23/UBA3/UBE2L6/CUL2/HERC4/ANAPC1/WWP2/UBE2B/UBE2I/CUL4B/BTRC/PIAS1/KEAP1/UBE2D3/UBE3C/PIAS2/CDC26/CDC16/SAE1/MDM2/UBE2W/FBXO4/STUB1/UBA2/UBE2J2/XIAP/PRPF1…
KEGG_VALINE_LEUCINE_AND_ISOLEUCINE_DEGRADATION	KEGG_VALINE_LEUCINE_AND_ISOLEUCINE_DEGRADATION	KEGG_VALINE_LEUCINE_AND_ISOLEUCINE_DEGRADATION	43	0.500679465033419	2.40505353927838	2.17186088046364e-07	4.83239045903159e-06	3.20063708699904e-06	3756	tags=60%, list=18%, signal=50%	PCCA/ALDH3A2/ALDH6A1/AUH/ACAT2/HMGCL/BCAT2/MCEE/ECHS1/ACAD8/HMGCS2/PCCB/ACAT1/DLD/MCCC2/MCCC1/ALDH7A1/ALDH2/EHHADH/HADHB/BCKDHB/ABAT/HIBADH/HADHA/ACADM/HSD17B10
KEGG_PROTEIN_EXPORT	KEGG_PROTEIN_EXPORT	KEGG_PROTEIN_EXPORT	22	0.634976202166912	2.59269050372399	3.09672067767076e-07	6.12462534028218e-06	4.05652299297223e-06	5351	tags=86%, list=25%, signal=65%	SEC61B/SRP54/HSPA5/SPCS1/SEC11C/SEC61G/SEC63/SEC61A1/SRP14/SRP68/SRPRB/SEC62/IMMP2L/SRP9/SPCS2/OXA1L/SPCS3/SRP19/SRP72
KEGG_PEROXISOME	KEGG_PEROXISOME	KEGG_PEROXISOME	78	0.414709885153848	2.21148229685602	6.17287015350234e-07	1.09877088732342e-05	7.27748902307645e-06	9730	tags=79%, list=46%, signal=43%	ACOT8/PRDX1/PEX7/DAO/PEX2/PAOX/EPHX2/HMGCL/PXMP4/PEX10/ACSL1/MPV17L/SOD1/PEX1/ECH1/ECI2/EHHADH/CRAT/SCP2/NUDT19/GNPAT/PEX11B/ACSL3/SLC27A2/PEX3/MLYCD/SLC25A17/CAT/ACOX3/PEX19/PEX13/PXMP2/PIPOX/IDH2/HACL1/AMACR/PEX14/ABCD3/PEX11A/PMVK/DHRS4/PEX26/HSD17B4/IDH1/ACAA1/PEX16/MVK/PHYH/ACSL5/PEX5/ABCD4/FAR1/ACSL6/PRDX5/NUDT12/FAR2/HAO2/CROT/PEX11G/PEX12/ACOX1/MPV17
KEGG_RNA_DEGRADATION	KEGG_RNA_DEGRADATION	KEGG_RNA_DEGRADATION	54	0.461879516721855	2.32390162451005	6.96698610989798e-07	1.12738502505622e-05	7.46700903644569e-06	9310	tags=87%, list=44%, signal=49%	PNPT1/CNOT6/CNOT1/CNOT6L/XRN1/CNOT8/LSM4/HSPA9/HSPD1/LSM8/EXOSC1/DCPS/PAPOLA/LSM3/EXOSC7/DCP2/EXOSC3/C1D/SKIV2L/XRN2/CNOT10/EXOSC4/CNOT7/PAPOLG/EDC4/LSM5/PARN/DCP1A/WDR61/TTC37/LSM1/CNOT3/MPHOSPH6/PATL1/EDC3/EXOSC9/EXOSC8/ENO3/CNOT4/CNOT2/LSM6/EXOSC5/LSM7/EXOSC2/DDX6/EXOSC6/ZCCHC7
KEGG_CITRATE_CYCLE_TCA_CYCLE	KEGG_CITRATE_CYCLE_TCA_CYCLE	KEGG_CITRATE_CYCLE_TCA_CYCLE	30	0.553566679411046	2.44379173428436	1.02600902267123e-06	1.52191338362899e-05	1.00800886437875e-05	7338	tags=83%, list=34%, signal=55%	ACLY/MDH1/SDHC/ACO2/PCK2/PDHB/MDH2/SDHA/IDH3G/DLD/SDHB/SUCLA2/DLAT/IDH3A/DLST/PC/SUCLG2/CS/OGDH/IDH2/IDH3B/FH/SUCLG1/IDH1/SDHD
KEGG_PROPANOATE_METABOLISM	KEGG_PROPANOATE_METABOLISM	KEGG_PROPANOATE_METABOLISM	31	0.525360526758834	2.3356600212451	8.13455989940206e-06	0.000111380897084121	7.37709075897191e-05	3839	tags=61%, list=18%, signal=50%	PCCA/ALDH3A2/ACSS1/ALDH6A1/ACAT2/MCEE/ECHS1/PCCB/ACAT1/ALDH7A1/ACACA/ALDH2/EHHADH/SUCLA2/ABAT/MLYCD/HADHA/ACADM/SUCLG2
KEGG_N_GLYCAN_BIOSYNTHESIS	KEGG_N_GLYCAN_BIOSYNTHESIS	KEGG_N_GLYCAN_BIOSYNTHESIS	45	0.430093236542601	2.08476557776155	2.80658145512475e-05	0.000356836785008718	0.000236343701484189	6989	tags=69%, list=33%, signal=46%	ALG5/ALG8/ALG2/TUSC3/ALG11/DOLPP1/B4GALT3/ALG6/MGAT4A/DDOST/DPM3/ALG3/DPAGT1/GANAB/STT3A/ALG1/RFT1/DAD1/ALG14/DPM2/RPN2/B4GALT2/MAN2A1/MGAT2/ALG9/STT3B/RPN1/MAN1A2/MAN2A2/MGAT4B/MGAT1
KEGG_PYRIMIDINE_METABOLISM	KEGG_PYRIMIDINE_METABOLISM	KEGG_PYRIMIDINE_METABOLISM	92	0.352335427424725	1.92540640829048	3.28667586813698e-05	0.000390018869685588	0.000258321191039538	11201	tags=82%, list=53%, signal=39%	PNPT1/CTPS2/UMPS/POLR2C/POLR3H/UPRT/DCTD/NT5C2/CANT1/POLR2E/POLD2/POLR3K/ENTPD6/NME4/POLR3B/POLR1C/POLA2/POLR1D/POLR2G/UCKL1/POLR2H/DPYS/CMPK1/AK3/POLR2F/NME3/PNP/ENTPD4/POLD4/POLR3A/ITPA/POLR2B/POLE2/NME1/POLE4/POLE/POLR1A/POLR2J/POLR3F/NT5C1B/NME5/UPB1/POLR2L/POLR2I/POLR2D/TK1/NME6/POLR2K/POLR3D/UCK1/RRM2B/POLR3C/ENTPD3/POLE3/TK2/PRIM2/NT5C3A/TXNRD2/CTPS1/DHODH/NT5C1A/TXNRD1/POLD1/CAD/POLR2A/NT…
KEGG_OOCYTE_MEIOSIS	KEGG_OOCYTE_MEIOSIS	KEGG_OOCYTE_MEIOSIS	108	0.331254149579854	1.84077703974441	3.56401774733836e-05	0.000396496974391393	0.000262611834014406	8792	tags=64%, list=41%, signal=38%	YWHAQ/PPP2R5D/REC8/ADCY6/MAP2K1/YWHAG/PPP2CA/RBX1/RPS6KA2/ANAPC11/ANAPC13/ANAPC5/ANAPC10/CHP1/RPS6KA3/CAMK2B/MAPK1/CALM1/PPP2CB/MAPK3/PRKACB/RPS6KA1/CDC23/ANAPC1/SMC1A/BTRC/CAMK2G/PPP1CB/ADCY3/CCNB2/ITPR2/PKMYT1/ITPR3/PTTG1/PPP3CC/YWHAZ/CDC26/PPP1CA/CCNE2/PPP2R5C/SMC3/YWHAE/CCNE1/CDC16/CCNB1/PPP1CC/FBXW11/CUL1/CPEB1/ADCY1/ADCY4/SLK/PPP3R1/IGF1R/YWHAB/PPP2R1B/CHP2/PRKX/YWHAH/ANAPC7/PPP2R5B/PRKACA/…
KEGG_PROGESTERONE_MEDIATED_OOCYTE_MATURATION	KEGG_PROGESTERONE_MEDIATED_OOCYTE_MATURATION	KEGG_PROGESTERONE_MEDIATED_OOCYTE_MATURATION	84	0.359977540664949	1.93743572944845	7.72725774371257e-05	0.000808918883861542	0.000535771229997	8699	tags=68%, list=41%, signal=40%	ARAF/ADCY6/PIK3R3/MAP2K1/AKT3/RPS6KA2/HSP90AB1/ANAPC11/FZR1/ANAPC13/PIK3CA/ANAPC5/ANAPC10/RPS6KA3/AKT1/MAPK1/MAPK3/PRKACB/RPS6KA1/CDC23/GNAI3/ANAPC1/RAF1/MAPK9/PIK3CB/BRAF/CDC25A/ADCY3/CCNB2/PKMYT1/CDC26/PIK3R5/PDE3B/CDC16/CCNB1/CCNA2/CPEB1/ADCY1/ADCY4/GNAI1/IGF1R/MAPK10/KRAS/AKT2/PIK3R2/PRKX/MAPK14/ANAPC7/PRKACA/MAPK8/MAPK13/ANAPC2/HSP90AA1/CDC27/MAD2L1/CCNB3/SPDYA
KEGG_VASOPRESSIN_REGULATED_WATER_REABSORPTION	KEGG_VASOPRESSIN_REGULATED_WATER_REABSORPTION	KEGG_VASOPRESSIN_REGULATED_WATER_REABSORPTION	44	0.427432810513072	2.06104752028182	8.18007860084706e-05	0.000808918883861542	0.000535771229997	7970	tags=68%, list=37%, signal=43%	CREB3L2/RAB5A/ADCY6/RAB11A/DCTN6/DYNLL2/DYNC1H1/DYNC1LI1/CREB3L4/DYNC1I2/DCTN4/PRKACB/STX4/DYNC2LI1/DYNC1LI2/VAMP2/CREB3/ADCY3/DYNC2H1/AQP3/GNAS/DYNLL1/DCTN2/RAB5B/RAB11B/CREB1/PRKX/RAB5C/DCTN1/PRKACA
KEGG_ENDOCYTOSIS	KEGG_ENDOCYTOSIS	KEGG_ENDOCYTOSIS	171	0.287477718802359	1.68229042477192	8.85530581070918e-05	0.000829602333845387	0.000549470499057855	11509	tags=74%, list=54%, signal=34%	CHMP2A/AGAP1/STAMBP/TSG101/RAB11FIP1/VPS37C/CHMP1B/ADRB2/PDCD6IP/STAM/VPS4B/VPS25/RNF41/NEDD4L/RAB5A/RAB11A/ERBB3/EPN2/CLTC/EGF/ARFGAP3/AP2A2/SNF8/FGFR3/CHMP5/WWP1/CHMP4C/SMURF1/ARFGAP2/AP2S1/RAB11FIP3/DAB2/USP8/CHMP3/PIP5K1A/CHMP2B/PLD2/HSPA8/RAB4A/VPS37A/ARF6/RABEP1/CDC42/CHMP4B/DNM1L/VTA1/PRKCI/DNM2/ADRB1/LDLRAP1/PRKCZ/CLTA/IQSEC1/RET/VPS4A/EEA1/MVB12A/DNAJC6/CLTB/EPS15/RUFY1/MET/ARRB1/MDM2/GR…
KEGG_FATTY_ACID_METABOLISM	KEGG_FATTY_ACID_METABOLISM	KEGG_FATTY_ACID_METABOLISM	40	0.428588743627298	2.02139760029122	0.000139398615776531	0.00124064768041112	0.000821718156156393	3687	tags=50%, list=17%, signal=41%	ADH5/ALDH3A2/ACAT2/CPT2/ECHS1/ACSL1/ACAT1/ALDH7A1/ACADL/ECI2/ALDH2/EHHADH/HADHB/GCDH/ACSL3/ECI1/CPT1A/ACOX3/HADHA/ACADM
KEGG_PROSTATE_CANCER	KEGG_PROSTATE_CANCER	KEGG_PROSTATE_CANCER	88	0.333030304675911	1.81025240513979	0.0002346841032123	0.0019892271605614	0.00131752478996379	7281	tags=56%, list=34%, signal=37%	MTOR/CREB3L2/ARAF/PIK3R3/MAP2K1/ATF4/AKT3/EGF/HSP90AB1/EP300/KLK3/PIK3CA/AKT1/CREB3L4/MAPK1/GSK3B/HSP90B1/BAD/IKBKG/MAPK3/CDKN1B/RAF1/PIK3CB/ERBB2/CREBBP/BRAF/CREB3/NRAS/PIK3R5/CCNE2/SOS2/RELA/CCNE1/RB1/GRB2/MDM2/TP53/SOS1/PDGFB/CTNNB1/IGF1R/CHUK/PDGFA/KRAS/IKBKB/AKT2/E2F1/PIK3R2/CREB1
KEGG_RENAL_CELL_CARCINOMA	KEGG_RENAL_CELL_CARCINOMA	KEGG_RENAL_CELL_CARCINOMA	66	0.369708652958105	1.9242059292945	0.000249101161108693	0.00201350693919855	0.00133360601531779	7274	tags=64%, list=34%, signal=42%	ARAF/PIK3R3/MAP2K1/CRK/RBX1/AKT3/EP300/FLCN/PIK3CA/AKT1/MAPK1/HGF/CRKL/ARNT/MAPK3/CUL2/GAB1/CDC42/RAF1/SLC2A1/PIK3CB/RAC1/CREBBP/BRAF/NRAS/RAP1B/PAK2/PIK3R5/SOS2/MET/GRB2/PAK4/PTPN11/SOS1/ARNT2/PDGFB/FH/EGLN2/KRAS/AKT2/VEGFC/PIK3R2
KEGG_BETA_ALANINE_METABOLISM	KEGG_BETA_ALANINE_METABOLISM	KEGG_BETA_ALANINE_METABOLISM	22	0.507599306051853	2.07259405314151	0.000260172244952622	0.00201350693919855	0.00133360601531779	3687	tags=55%, list=17%, signal=45%	ALDH3A2/AOC2/ECHS1/ALDH7A1/ALDH2/EHHADH/ABAT/SMS/DPYS/MLYCD/HADHA/ACADM
KEGG_NUCLEOTIDE_EXCISION_REPAIR	KEGG_NUCLEOTIDE_EXCISION_REPAIR	KEGG_NUCLEOTIDE_EXCISION_REPAIR	44	0.402322714141679	1.93996860311078	0.00032582117380326	0.00241650703904085	0.00160052506429672	6163	tags=64%, list=29%, signal=45%	ERCC3/RFC3/CDK7/RBX1/POLD2/CCNH/RAD23B/RFC5/CUL4A/RPA3/DDB1/RAD23A/GTF2H5/CUL4B/RFC1/XPA/POLD4/MNAT1/RPA1/POLE2/RPA2/RFC4/POLE4/POLE/ERCC5/ERCC6/GTF2H3/LIG1
KEGG_INSULIN_SIGNALING_PATHWAY	KEGG_INSULIN_SIGNALING_PATHWAY	KEGG_INSULIN_SIGNALING_PATHWAY	134	0.295965687385601	1.68484283979855	0.000357719170213556	0.00254696049192052	0.00168692829742814	7978	tags=57%, list=37%, signal=36%	MTOR/PHKA1/FBP1/ARAF/PRKAA2/PIK3R3/MAP2K1/CRK/AKT3/PCK2/PIK3CA/PRKAG1/EIF4E/GYS1/AKT1/MAPK1/CALM1/ACACA/GSK3B/CRKL/PHKA2/BAD/RPTOR/SOCS4/MAPK3/PRKACB/PTPRF/FASN/RPS6KB1/RAF1/PRKAG2/INSR/MAPK9/PIK3CB/PYGL/PRKCI/HK1/BRAF/PPP1CB/PRKAR2A/MKNK1/PRKCZ/NRAS/PYGB/TSC1/PPP1R3D/PIK3R5/PPP1CA/PDE3B/SOS2/PRKAA1/HK3/MKNK2/GRB2/IRS4/PPP1CC/INPP5K/RHEB/SOS1/EIF4E2/ELK1/PTPN1/EXOC7/MAPK10/IRS1/PHKB/KRAS/IKBKB/AK…
KEGG_SNARE_INTERACTIONS_IN_VESICULAR_TRANSPORT	KEGG_SNARE_INTERACTIONS_IN_VESICULAR_TRANSPORT	KEGG_SNARE_INTERACTIONS_IN_VESICULAR_TRANSPORT	37	0.42243683246921	1.95886305775383	0.000459882867659617	0.00314842886320815	0.00208529883311243	8267	tags=76%, list=39%, signal=46%	VAMP8/SNAP23/VTI1B/SEC22B/BET1/STX10/SNAP29/STX4/STX17/VAMP7/STX18/VAMP2/BNIP1/STX12/USE1/YKT6/STX7/STX3/STX2/STX16/STX8/GOSR1/BET1L/VAMP1/STX5/STX11/STX6/VAMP5
KEGG_PURINE_METABOLISM	KEGG_PURINE_METABOLISM	KEGG_PURINE_METABOLISM	147	0.284504678574048	1.63504700770316	0.000572431595224954	0.00377380829444599	0.00249950638070935	11201	tags=73%, list=53%, signal=35%	PNPT1/PRPS1/PDE11A/ADSL/ADCY6/POLR2C/APRT/NUDT9/PAICS/POLR3H/AK2/PRPS2/NT5C2/ENPP3/CANT1/POLR2E/FHIT/DGUOK/POLD2/POLR3K/ENTPD6/NME4/POLR3B/POLR1C/POLA2/POLR1D/POLR2G/POLR2H/ADK/NUDT5/POLR2F/NME3/PNP/ENTPD4/POLD4/ADCY3/POLR3A/AK4/ITPA/PDE8B/GUK1/GART/POLR2B/GMPS/PDE3B/POLE2/NME1/PDE1B/GMPR2/POLE4/PDE7A/AMPD3/ADPRM/POLE/POLR1A/POLR2J/POLR3F/ATIC/NT5C1B/PDE6D/NME5/GUCY2F/PDE6G/ADCY1/ADCY4/PDE8A/IMPD…
KEGG_PYRUVATE_METABOLISM	KEGG_PYRUVATE_METABOLISM	KEGG_PYRUVATE_METABOLISM	40	0.404336551707807	1.9070144689636	0.000674804924151068	0.00428983130353179	0.00284128389116239	3511	tags=45%, list=16%, signal=38%	ALDH3A2/ACSS1/MDH1/ACAT2/PCK2/PDHB/MDH2/ME2/ACAT1/DLD/GRHPR/ALDH7A1/ACACA/ALDH2/HAGH/DLAT/GLO1/PC
KEGG_TERPENOID_BACKBONE_BIOSYNTHESIS	KEGG_TERPENOID_BACKBONE_BIOSYNTHESIS	KEGG_TERPENOID_BACKBONE_BIOSYNTHESIS	15	0.562919281165836	2.06498586586572	0.000765715966519469	0.00461131311311632	0.00305421093240111	4895	tags=73%, list=23%, signal=57%	ACAT2/FDPS/HMGCS2/GGPS1/IDI1/HMGCR/IDI2/ACAT1/PDSS1/DHDDS/HMGCS1
KEGG_LYSINE_DEGRADATION	KEGG_LYSINE_DEGRADATION	KEGG_LYSINE_DEGRADATION	39	0.409886271610588	1.92347023565782	0.000777187603334212	0.00461131311311632	0.00305421093240111	6941	tags=64%, list=33%, signal=43%	ALDH3A2/ACAT2/ECHS1/AASDHPPT/ACAT1/ALDH7A1/ALDH2/EHHADH/GCDH/SETD7/SETD1B/AASDH/DLST/DOT1L/PLOD2/HADHA/OGDH/PIPOX/ASH1L/AADAT/SUV39H2/EHMT1/PLOD3/HADH/SETDB2
KEGG_RIBOSOME	KEGG_RIBOSOME	KEGG_RIBOSOME	83	0.325249047405127	1.75001325229232	0.000920463984393221	0.00528524481361269	0.00350057610363466	12797	tags=89%, list=60%, signal=36%	MRPL13/RPS27L/RPL7A/RPL22L1/RPS29/RPL18/RPS4Y1/RPL23A/RPS2/RPLP0/RPL26L1/RPL8/RPL23/RPS16/RPL27A/RPS18/RPS17/RPL17/RPS23/RPL24/RPL19/RPL41/RPS15/RPL11/RPS9/RPL12/RPL35/RPS6/RPL14/RPL3/RPL22/RPS12/RPL15/RSL24D1/RPL36A/UBA52/RPL38/RPS8/RPL6/RPL37A/RPL9/RPL13A/RPS3/RPL35A/RPL29/RPL10A/RPS15A/RPS25/FAU/RPL13/RPS19/RPS5/RPS24/RPS21/RPL31/RPL39/RPS7/RPS27A/RPL30/RPS3A/RPL32/RPSA/RPS28/RPL7/RPS11/RPL10/…
KEGG_AMINO_SUGAR_AND_NUCLEOTIDE_SUGAR_METABOLISM	KEGG_AMINO_SUGAR_AND_NUCLEOTIDE_SUGAR_METABOLISM	KEGG_AMINO_SUGAR_AND_NUCLEOTIDE_SUGAR_METABOLISM	41	0.40424168100594	1.91537714885324	0.00096440910683886	0.00536452565679116	0.00355308618309054	7468	tags=66%, list=35%, signal=43%	HEXB/CMAS/NANS/GNPDA2/CYB5R1/GFPT1/MPI/GNPNAT1/GALT/GNE/NAGK/PGM3/UAP1/PMM1/GPI/NANP/HK1/UGP2/FPGT/PGM2/HK3/PMM2/GMPPA/GNPDA1/GALE/UGDH/GFPT2
KEGG_LYSOSOME	KEGG_LYSOSOME	KEGG_LYSOSOME	120	0.288235800411942	1.62234078018753	0.00111370095120655	0.00596266286047907	0.00394925038659761	9787	tags=66%, list=46%, signal=36%	HEXB/AGA/GALC/PPT1/AP3B1/SCARB2/ACP2/CLTC/AP1G1/IGF2R/AP3M1/FUCA1/CTSO/SLC17A5/ATP6AP1/NAGPA/ATP6V1H/GNPTG/SMPD1/CD164/NEU1/NAGLU/AP1M2/CLN3/SUMF1/ATP6V0A1/CLN5/ATP6V0B/PSAPL1/GAA/NAGA/SGSH/AP3M2/CTNS/GGA1/ENTPD4/ATP6V0D1/CLTA/ASAH1/NPC1/LIPA/HGSNAT/IDUA/M6PR/AP3S2/CLTB/AP4B1/DNASE2/PLA2G15/TPP1/AP1B1/GNS/GLB1/CTSV/AP3S1/AP3D1/MCOLN1/ATP6V0A2/CTSA/GUSB/ARSG/GM2A/CD63/CTSD/ATP6V0C/MFSD8/AP1M1/GGA3…
KEGG_ENDOMETRIAL_CANCER	KEGG_ENDOMETRIAL_CANCER	KEGG_ENDOMETRIAL_CANCER	52	0.374624964484301	1.86593743560666	0.00113893560256342	0.00596266286047907	0.00394925038659761	5970	tags=56%, list=28%, signal=40%	ARAF/PIK3R3/MAP2K1/MLH1/CDH1/AKT3/EGF/PIK3CA/AKT1/MAPK1/CTNNA1/GSK3B/BAD/MAPK3/RAF1/PIK3CB/ERBB2/APC/BRAF/NRAS/PIK3R5/AXIN1/SOS2/GRB2/TP53/FOXO3/SOS1/CTNNB1/ELK1
KEGG_NEUROTROPHIN_SIGNALING_PATHWAY	KEGG_NEUROTROPHIN_SIGNALING_PATHWAY	KEGG_NEUROTROPHIN_SIGNALING_PATHWAY	122	0.283483590158198	1.59875100801308	0.001224148231351	0.00622566814801364	0.00412344667402441	9481	tags=64%, list=44%, signal=36%	YWHAQ/PIK3R3/MAP2K1/CRK/YWHAG/ATF4/AKT3/RPS6KA2/PIK3CA/ABL1/RPS6KA3/CAMK2B/AKT1/MAPK1/MAGED1/CALM1/TP73/GSK3B/CRKL/BAD/MAPK3/RPS6KA1/IRAK1/GAB1/CDC42/RAF1/MAPK9/PIK3CB/RAC1/BAX/KIDINS220/BRAF/CAMK2G/RIPK2/PRKCD/NRAS/ZNF274/RAP1B/YWHAZ/PIK3R5/SOS2/RELA/FRS2/YWHAE/GRB2/TP53/IRS4/RHOA/FOXO3/PTPN11/SOS1/SH2B3/TRAF6/MAPK10/YWHAB/PSEN1/IRS1/KRAS/IKBKB/MAP3K3/AKT2/PIK3R2/PRDM4/MAPKAPK2/YWHAH/MAPK14/MAPK…
KEGG_RNA_POLYMERASE	KEGG_RNA_POLYMERASE	KEGG_RNA_POLYMERASE	27	0.458826924454413	1.9660369860501	0.00136314547686215	0.00665075443229434	0.0044049940651506	7996	tags=78%, list=38%, signal=49%	POLR2C/POLR3H/POLR2E/POLR3K/POLR3B/POLR1C/POLR1D/POLR2G/POLR2H/POLR2F/POLR3A/POLR2B/POLR1A/POLR2J/POLR3F/POLR2L/POLR2I/POLR2D/POLR2K/POLR3D/POLR3C
KEGG_MTOR_SIGNALING_PATHWAY	KEGG_MTOR_SIGNALING_PATHWAY	KEGG_MTOR_SIGNALING_PATHWAY	50	0.372802780672502	1.84433298105586	0.00138246019098253	0.00665075443229434	0.0044049940651506	8417	tags=68%, list=39%, signal=41%	MTOR/PRKAA2/PIK3R3/CAB39L/AKT3/RPS6KA2/MLST8/PIK3CA/EIF4E/RPS6KA3/AKT1/MAPK1/CAB39/RICTOR/RPTOR/MAPK3/RPS6KA1/RPS6KB1/PIK3CB/BRAF/TSC1/PIK3R5/PRKAA1/ULK2/RHEB/EIF4E2/ULK3/AKT2/VEGFC/PIK3R2/RPS6/EIF4B/ULK1/TSC2
KEGG_RIBOFLAVIN_METABOLISM	KEGG_RIBOFLAVIN_METABOLISM	KEGG_RIBOFLAVIN_METABOLISM	14	0.570902543631149	2.04633533572746	0.00151466020009524	0.00702242025111761	0.0046511594803381	2989	tags=64%, list=14%, signal=55%	ACP1/MTMR2/ACP2/FLAD1/PHPT1/RFK/ENPP3/ACP6/MTMR6
KEGG_ERBB_SIGNALING_PATHWAY	KEGG_ERBB_SIGNALING_PATHWAY	KEGG_ERBB_SIGNALING_PATHWAY	86	0.311429868194454	1.68395823283129	0.0015386201673797	0.00702242025111761	0.0046511594803381	7274	tags=53%, list=34%, signal=35%	MTOR/ARAF/PIK3R3/ERBB3/MAP2K1/CRK/AKT3/MAP2K4/EGF/NRG1/PIK3CA/ABL1/BTC/CAMK2B/AKT1/MAPK1/GSK3B/CRKL/BAD/MAPK3/CDKN1B/PTK2/GAB1/RPS6KB1/RAF1/NCK1/MAPK9/PIK3CB/NCK2/ERBB2/BRAF/CAMK2G/NRAS/PAK2/PIK3R5/SOS2/GRB2/PAK4/SOS1/ELK1/STAT5B/MAPK10/ERBB4/KRAS/AKT2/PIK3R2
KEGG_CHRONIC_MYELOID_LEUKEMIA	KEGG_CHRONIC_MYELOID_LEUKEMIA	KEGG_CHRONIC_MYELOID_LEUKEMIA	73	0.325708290902218	1.72096412490424	0.0020164162653316	0.00897305238072562	0.00594312162413524	7274	tags=56%, list=34%, signal=37%	ARAF/PIK3R3/MAP2K1/CRK/AKT3/PIK3CA/ABL1/HDAC2/AKT1/MAPK1/CRKL/BAD/IKBKG/MAPK3/CDK6/CDKN1B/RAF1/PIK3CB/BCR/CTBP1/BRAF/NRAS/SMAD4/PIK3R5/SOS2/RELA/BCL2L1/RB1/GRB2/HDAC1/MDM2/TP53/PTPN11/SOS1/STAT5B/CHUK/KRAS/IKBKB/AKT2/E2F1/PIK3R2
KEGG_MISMATCH_REPAIR	KEGG_MISMATCH_REPAIR	KEGG_MISMATCH_REPAIR	23	0.442609505113514	1.82901141173679	0.00244167573656639	0.0103951704113252	0.00688503303411248	6765	tags=70%, list=32%, signal=48%	RFC3/MLH1/POLD2/RFC5/RPA3/RFC1/SSBP1/POLD4/RPA1/RPA2/RFC4/MLH3/MSH3/LIG1/MSH6/MSH2
KEGG_ARGININE_AND_PROLINE_METABOLISM	KEGG_ARGININE_AND_PROLINE_METABOLISM	KEGG_ARGININE_AND_PROLINE_METABOLISM	49	0.359685325262129	1.76781680261678	0.00245279301840257	0.0103951704113252	0.00688503303411248	9386	tags=69%, list=44%, signal=39%	ALDH3A2/ALDH18A1/DAO/GLUD1/P4HA3/GLUD2/GOT2/ASL/ARG2/MAOA/ALDH7A1/ALDH2/SMS/PYCR1/P4HA1/LAP3/GLS/CKB/GAMT/AGMAT/GOT1/CKMT1A/SAT2/GATM/AMD1/ALDH4A1/ALDH9A1/SAT1/CPS1/ODC1/CKMT2/AOC1/GLUL/SRM
KEGG_BUTANOATE_METABOLISM	KEGG_BUTANOATE_METABOLISM	KEGG_BUTANOATE_METABOLISM	33	0.405154781352708	1.82439069451427	0.00307988847512229	0.0127493057807388	0.00844424747157153	6943	tags=61%, list=33%, signal=41%	ALDH3A2/AACS/ACAT2/HMGCL/BDH1/ECHS1/PDHB/HMGCS2/ACAT1/ALDH7A1/ALDH2/EHHADH/ABAT/ALDH5A1/HADHA/HMGCS1/OXCT1/ACSM5/HADH/L2HGDH
KEGG_GLYCOSYLPHOSPHATIDYLINOSITOL_GPI_ANCHOR_BIOSYNTHESIS	KEGG_GLYCOSYLPHOSPHATIDYLINOSITOL_GPI_ANCHOR_BIOSYNTHESIS	KEGG_GLYCOSYLPHOSPHATIDYLINOSITOL_GPI_ANCHOR_BIOSYNTHESIS	25	0.430006485650556	1.81638764033328	0.00323815307109574	0.0130998010603419	0.0086763910038929	7901	tags=76%, list=37%, signal=48%	PIGP/PIGM/PIGY/PIGG/PIGS/PIGH/PIGC/PIGV/GPLD1/PIGX/PIGZ/DPM2/PIGT/PIGF/PIGO/PIGN/PIGA/GPAA1/PIGB
KEGG_PANCREATIC_CANCER	KEGG_PANCREATIC_CANCER	KEGG_PANCREATIC_CANCER	69	0.312825284991662	1.63760327988412	0.00421409746160908	0.0166690966259203	0.0110404424725197	12741	tags=86%, list=60%, signal=35%	ARAF/PIK3R3/MAP2K1/AKT3/EGF/PIK3CA/AKT1/MAPK1/BAD/IKBKG/MAPK3/CDK6/CDC42/RAF1/MAPK9/PIK3CB/RAC1/ERBB2/BRAF/STAT1/RALB/SMAD4/PIK3R5/RELA/BCL2L1/RB1/TP53/PLD1/RALGDS/MAPK10/CHUK/KRAS/IKBKB/AKT2/VEGFC/E2F1/PIK3R2/RAC3/RAD51/CDK4/RALA/MAPK8/STAT3/NFKB1/RALBP1/CASP9/TGFB2/VEGFA/JAK1/EGFR/SMAD2/TGFA/SMAD3/TGFBR1/VEGFB/TGFBR2/TGFB3/CCND1/PGF
KEGG_PATHOGENIC_ESCHERICHIA_COLI_INFECTION	KEGG_PATHOGENIC_ESCHERICHIA_COLI_INFECTION	KEGG_PATHOGENIC_ESCHERICHIA_COLI_INFECTION	52	0.349763019007036	1.7421046983733	0.00460084730425626	0.0178032786990786	0.0117916452649131	4630	tags=44%, list=22%, signal=35%	KRT18/YWHAQ/TUBB4B/CDH1/ARPC5L/ARPC1A/ABL1/TLR4/CTTN/NCL/CDC42/NCK1/ARPC3/NCK2/OCLN/ARPC2/TUBB/TUBB3/TUBA3C/ROCK1/YWHAZ/ARPC5/TUBA4A
KEGG_COLORECTAL_CANCER	KEGG_COLORECTAL_CANCER	KEGG_COLORECTAL_CANCER	62	0.324402819035759	1.67143235638545	0.00727205204889804	0.0275409630788053	0.0182412055873814	7334	tags=58%, list=34%, signal=38%	ARAF/PIK3R3/MAP2K1/MLH1/AKT3/PIK3CA/AKT1/MAPK1/GSK3B/BAD/MAPK3/BIRC5/RAF1/MAPK9/PIK3CB/RAC1/CYCS/BAX/APPL1/APC/BRAF/SMAD4/PIK3R5/AXIN1/TP53/RHOA/MSH3/CTNNB1/RALGDS/MAPK10/MSH6/MSH2/KRAS/AKT2/PIK3R2/RAC3
KEGG_VIBRIO_CHOLERAE_INFECTION	KEGG_VIBRIO_CHOLERAE_INFECTION	KEGG_VIBRIO_CHOLERAE_INFECTION	52	0.338556098711419	1.68628510784965	0.00744359659373786	0.0276033373684446	0.0182825179495316	3943	tags=42%, list=18%, signal=35%	SEC61B/ARF1/ATP6V1A/KDELR3/SLC12A2/TJP1/ATP6V1G1/ATP6AP1/TJP2/ATP6V1H/ATP6V1D/ATP6V1F/ATP6V1B2/KDELR2/ATP6V0A1/SEC61G/PRKACB/SEC61A1/ATP6V0B/PDIA4/ATP6V0D1/ADCY3
KEGG_AMINOACYL_TRNA_BIOSYNTHESIS	KEGG_AMINOACYL_TRNA_BIOSYNTHESIS	KEGG_AMINOACYL_TRNA_BIOSYNTHESIS	21	0.41443936270806	1.67057346881222	0.0133749608885177	0.0485865926154318	0.0321803570250051	4302	tags=52%, list=20%, signal=42%	FARSB/IARS2/NARS2/RARS2/AARS2/LARS2/FARSA/CARS2/EARS2/SEPSECS/MTFMT
KEGG_LONG_TERM_POTENTIATION	KEGG_LONG_TERM_POTENTIATION	KEGG_LONG_TERM_POTENTIATION	68	0.289139554828644	1.51093576349722	0.0170403538722115	0.0595338892882487	0.0394310798360961	4643	tags=40%, list=22%, signal=31%	ARAF/MAP2K1/ATF4/RPS6KA2/EP300/CHP1/RPS6KA3/CAMK2B/MAPK1/CALM1/PLCB1/MAPK3/PLCB4/PRKACB/RPS6KA1/RAF1/CREBBP/BRAF/CAMK2G/PPP1CB/GNAQ/NRAS/ITPR2/ITPR3/RAP1B/PPP3CC/PPP1CA
KEGG_ACUTE_MYELOID_LEUKEMIA	KEGG_ACUTE_MYELOID_LEUKEMIA	KEGG_ACUTE_MYELOID_LEUKEMIA	57	0.308232658622678	1.56351988598293	0.0170574626612398	0.0595338892882487	0.0394310798360961	7304	tags=56%, list=34%, signal=37%	MTOR/ARAF/PIK3R3/MAP2K1/AKT3/PIK3CA/AKT1/MAPK1/BAD/IKBKG/MAPK3/RPS6KB1/RAF1/PIK3CB/PIM2/BRAF/NRAS/PIK3R5/SOS2/RELA/ZBTB16/GRB2/SOS1/CEBPA/STAT5B/CHUK/KRAS/IKBKB/AKT2/PIK3R2/JUP/PML
KEGG_BASAL_TRANSCRIPTION_FACTORS	KEGG_BASAL_TRANSCRIPTION_FACTORS	KEGG_BASAL_TRANSCRIPTION_FACTORS	33	0.357100934317765	1.60800674595649	0.0175508603415236	0.0600779450152154	0.0397914242560859	10882	tags=82%, list=51%, signal=40%	TBPL1/GTF2B/GTF2A2/STON1/TAF7/TAF2/GTF2IRD1/GTF2I/GTF2A1/GTF2E2/TAF1/GTF2H3/TAF6L/TAF6/TAF10/TAF9B/TAF13/GTF2E1/GTF2H2/GTF2A1L/TAF11/TAF5L/GTF2H1/TAF12/TAF4B/TAF4/TBP
KEGG_GLYCEROPHOSPHOLIPID_METABOLISM	KEGG_GLYCEROPHOSPHOLIPID_METABOLISM	KEGG_GLYCEROPHOSPHOLIPID_METABOLISM	66	0.29346275333873	1.52737233895757	0.0185297265451473	0.0622319117931363	0.0412180610338928	8961	tags=56%, list=42%, signal=33%	DGKD/PLA2G12A/CRLS1/GPD2/LYPLA1/LPCAT3/AGPAT3/LCLAT1/PLD2/CDS1/PCYT2/GNPAT/AGPAT2/CDIPT/MBOAT2/PEMT/CDS2/MBOAT1/LYPLA2/ADPRM/PLA2G15/PCYT1A/CHKB/PLD1/PTDSS1/PGS1/DGKE/DGKA/CHKA/ETNK2/PLA2G6/TAZ/PLA2G2F/AGPAT1/DGKQ/GPD1L/GPAM
KEGG_BASE_EXCISION_REPAIR	KEGG_BASE_EXCISION_REPAIR	KEGG_BASE_EXCISION_REPAIR	32	0.35856924300555	1.60714373363715	0.0221873511016654	0.0731360832610453	0.0484402207287822	8228	tags=69%, list=39%, signal=42%	LIG3/PARP2/POLD2/UNG/NTHL1/HMGB1/SMUG1/POLD4/PARP1/MPG/POLB/POLE2/POLE4/POLE/APEX2/APEX1/LIG1/PARP3/TDG/PARP4/NEIL2/POLE3
KEGG_FRUCTOSE_AND_MANNOSE_METABOLISM	KEGG_FRUCTOSE_AND_MANNOSE_METABOLISM	KEGG_FRUCTOSE_AND_MANNOSE_METABOLISM	31	0.355786545438393	1.58176408000067	0.025879917184265	0.0825602968460111	0.0546821599453178	8187	tags=68%, list=38%, signal=42%	MTMR2/FBP1/PHPT1/PFKFB4/MPI/SORD/MTMR6/PMM1/HK1/FPGT/ALDOA/PFKFB1/MTMR1/HK3/PFKFB2/PMM2/GMPPA/PFKL/ALDOC/GMDS/ALDOB
KEGG_TIGHT_JUNCTION	KEGG_TIGHT_JUNCTION	KEGG_TIGHT_JUNCTION	128	0.245301161684046	1.38840970980093	0.025974025974026	0.0825602968460111	0.0546821599453178	12611	tags=73%, list=59%, signal=30%	RAB3B/EPB41/PPP2CA/TJP1/MAGI3/AKT3/MPP5/CLDN7/TJP2/YES1/IGSF5/CSNK2A1/CLDN14/AKT1/AMOTL1/CTNNA1/CSNK2B/PPP2CB/CTTN/CSNK2A2/GNAI3/CDC42/MYL12A/PRKCI/OCLN/CGN/PRKCH/PPP2R2D/PRKCD/MAGI2/PRKCZ/NRAS/MYH10/MYH9/LLGL2/VAPA/ASH1L/CLDN8/RHOA/TJAP1/CTNNB1/EXOC4/PPP2R2C/PARD6B/GNAI1/SYMPK/PPP2R2A/CRB3/CLDN3/KRAS/ACTN2/PPP2R1B/CLDN6/F11R/AKT2/MYL12B/RRAS2/CDK4/CLDN22/SPTAN1/ACTN4/CASK/MYH2/PPP2R1A/RAB13/CLDN…
KEGG_GLIOMA	KEGG_GLIOMA	KEGG_GLIOMA	63	0.282308676982804	1.45469107884089	0.0300902708124373	0.0939661088528744	0.0622365712094733	7274	tags=51%, list=34%, signal=34%	MTOR/ARAF/PIK3R3/MAP2K1/AKT3/EGF/PIK3CA/CAMK2B/AKT1/MAPK1/CALM1/MAPK3/CDK6/RAF1/PIK3CB/BRAF/CAMK2G/NRAS/PIK3R5/SOS2/RB1/GRB2/MDM2/TP53/SOS1/PDGFB/IGF1R/PDGFA/KRAS/AKT2/E2F1/PIK3R2
KEGG_GRAFT_VERSUS_HOST_DISEASE	KEGG_GRAFT_VERSUS_HOST_DISEASE	KEGG_GRAFT_VERSUS_HOST_DISEASE	20	-0.277872	-1.37359	0.0309380011117735	0.0949476585844084	0.0628866810257465	15398	tags=100%, list=72%, signal=28%	CD80/PRF1/KLRC1/KLRD1/KIR2DL3/CD28/TNF/IFNG/KIR2DL5A/FASLG/IL1A/IL1B/KIR2DL2/FAS/CD86/GZMB/KIR2DL1/IL2/IL6
KEGG_ASTHMA	KEGG_ASTHMA	KEGG_ASTHMA	16	-0.324658	-1.44924	0.038252172249483	0.113757147662294	0.0753447695930037	11549	tags=94%, list=54%, signal=43%	IL13/CCL11/TNF/RNASE3/IL3/MS4A2/EPX/IL4/IL9/FCER1G/PRG2/FCER1A/IL5/CD40LG/IL10
KEGG_GLUTATHIONE_METABOLISM	KEGG_GLUTATHIONE_METABOLISM	KEGG_GLUTATHIONE_METABOLISM	47	0.300635986516176	1.46624653782694	0.0383451059535822	0.113757147662294	0.0753447695930037	12358	tags=81%, list=58%, signal=34%	GSTA4/GSTZ1/MGST2/PGD/TXNDC12/GSTO2/GCLM/GGCT/SMS/ANPEP/MGST3/GCLC/LAP3/IDH2/GSTO1/MGST1/GGT1/GSS/GPX5/GSTT2/GPX1/IDH1/GPX4/RRM2B/GSTA1/GPX7/GSR/ODC1/SRM/GSTT1/GGT7/OPLAH/RRM2/RRM1/GSTM1/GSTM3/GSTM2/G6PD
KEGG_CELL_CYCLE	KEGG_CELL_CYCLE	KEGG_CELL_CYCLE	124	0.236474756569092	1.33581137484285	0.041958041958042	0.122434942107073	0.0810923330336618	13822	tags=81%, list=65%, signal=29%	YWHAQ/RBL2/YWHAG/ORC4/CDK7/RBX1/EP300/ANAPC11/FZR1/ANAPC13/TFDP1/ABL1/CCNH/ANAPC5/ANAPC10/HDAC2/GSK3B/MAD1L1/ORC5/CDK6/CDKN1B/E2F4/CDC23/ANAPC1/SMC1A/STAG2/CREBBP/CDC25A/CCNB2/PKMYT1/STAG1/SMAD4/PTTG1/YWHAZ/CDC26/CCNE2/SMC3/YWHAE/CCNE1/CDC16/RB1/BUB3/HDAC1/MDM2/TP53/CCNB1/CCNA2/CUL1/MCM2/RAD21/YWHAB/E2F1/DBF4/YWHAH/ZBTB17/ANAPC7/CDK4/TFDP2/ANAPC2/ORC3/CDC27/ATR/PRKDC/MAD2L1/CCNB3/SKP1/CDK2/TTK/TG…
KEGG_EPITHELIAL_CELL_SIGNALING_IN_HELICOBACTER_PYLORI_INFECTION	KEGG_EPITHELIAL_CELL_SIGNALING_IN_HELICOBACTER_PYLORI_INFECTION	KEGG_EPITHELIAL_CELL_SIGNALING_IN_HELICOBACTER_PYLORI_INFECTION	68	0.269788176428762	1.40981265803115	0.0431293881644935	0.122719256052589	0.0812806426841515	10023	tags=65%, list=47%, signal=34%	ATP6V1A/ADAM10/TJP1/MAP2K4/ATP6V1G1/ATP6AP1/ATP6V1H/IGSF5/ATP6V1D/ATP6V1F/ATP6V1B2/ATP6V0A1/IKBKG/ATP6V0B/CDC42/MAPK9/RAC1/ATP6V0D1/RELA/MET/PTPN11/PTPRZ1/ATP6V0E1/MAP3K14/MAPK10/CHUK/F11R/IKBKB/ATP6V0A2/MAPK14/NOD1/MAPK8/MAPK13/ATP6V0C/JAM3/GIT1/ATP6V1C1/JUN/NFKB1/JAM2/ATP6V1E1/ADAM17/ATP6V1E2/ATP6V1G2
KEGG_TYPE_II_DIABETES_MELLITUS	KEGG_TYPE_II_DIABETES_MELLITUS	KEGG_TYPE_II_DIABETES_MELLITUS	46	0.300160290685694	1.45713217278295	0.0434343434343434	0.122719256052589	0.0812806426841515	7274	tags=50%, list=34%, signal=33%	MTOR/PIK3R3/PIK3CA/MAPK1/SOCS4/MAPK3/INSR/MAPK9/PIK3CB/CACNA1A/HK1/PRKCD/PDX1/PRKCZ/PIK3R5/HK3/IRS4/CACNA1D/CACNA1G/MAPK10/IRS1/IKBKB/PIK3R2
KEGG_CARDIAC_MUSCLE_CONTRACTION	KEGG_CARDIAC_MUSCLE_CONTRACTION	KEGG_CARDIAC_MUSCLE_CONTRACTION	72	0.263390760132597	1.38664305472414	0.046046046046046	0.128065565565566	0.0848216637690322	6276	tags=44%, list=29%, signal=31%	COX6A1/UQCR10/UQCRFS1/COX5A/COX7B/COX7A2/CACNA2D4/COX7A2L/CYC1/COX5B/COX4I2/COX6B1/UQCRH/CACNA2D1/COX8A/CACNB4/CACNB2/COX7C/UQCRC1/UQCRC2/CACNG4/COX6A2/UQCR11/ATP1A1/CACNG3/UQCRQ/COX6C/CACNA1D/UQCRB/ATP1B3/TPM3/ATP2A2
KEGG_FC_GAMMA_R_MEDIATED_PHAGOCYTOSIS	KEGG_FC_GAMMA_R_MEDIATED_PHAGOCYTOSIS	KEGG_FC_GAMMA_R_MEDIATED_PHAGOCYTOSIS	91	0.251309575167151	1.3725352343972	0.047	0.128707692307692	0.085246963562753	7364	tags=46%, list=35%, signal=30%	PIK3R3/MAP2K1/CRK/AKT3/ARPC5L/SCIN/ARPC1A/WASF3/PIK3CA/PIP5K1A/AKT1/MAPK1/PLD2/CRKL/MAPK3/PLA2G4F/ARF6/VAV2/RPS6KB1/CDC42/RAF1/DNM1L/ARPC3/PIK3CB/RAC1/DNM2/ARPC2/PRKCD/MARCKSL1/ARPC5/PIK3R5/LIMK2/SPHK2/PLD1/PIP4K2B/ASAP3/WASL/MYO10/AKT2/PIK3R2/ASAP2/PLA2G6
KEGG_ADIPOCYTOKINE_SIGNALING_PATHWAY	KEGG_ADIPOCYTOKINE_SIGNALING_PATHWAY	KEGG_ADIPOCYTOKINE_SIGNALING_PATHWAY	66	0.267796259102042	1.39378709555231	0.0480961923847695	0.129713973401348	0.0859134537016617	13704	tags=82%, list=64%, signal=29%	ADIPOR1/MTOR/PRKAA2/AKT3/PCK2/ADIPOR2/PRKAG1/ACSL1/AKT1/CAMKK1/IKBKG/ACSL3/SLC2A1/PRKAG2/MAPK9/CAMKK2/CPT1A/RELA/PRKAA1/LEPR/IRS4/PTPN11/JAK2/PPARA/MAPK10/CHUK/IRS1/TRADD/IKBKB/AKT2/PRKAB2/ACSL5/MAPK8/ACSL6/NPY/STAT3/NFKBIE/NFKB1/NFKBIB/G6PC/RXRB/RXRA/TNF/IRS2/PRKAG3/CD36/G6PC2/PRKCQ/RXRG/ACSL4/ACACB/TNFRSF1A/TRAF2/PPARGC1A

## Sheet: CLPP
	ID	Description	setSize	enrichmentScore	NES	pvalue	p.adjust	qvalue	rank	leading_edge	core_enrichment
KEGG_HUNTINGTONS_DISEASE	KEGG_HUNTINGTONS_DISEASE	KEGG_HUNTINGTONS_DISEASE	156	0.462199701521122	2.73098858858311	2.67339168364416e-19	4.73190328005017e-17	2.89851940437209e-17	6678	tags=69%, list=31%, signal=48%	NDUFC1/COX6A1/NDUFS1/AP2A2/NDUFC2/COX7A2L/SDHA/NDUFB4/NDUFA2/CYC1/NDUFV2/DNAL1/CLTC/COX7B/NDUFB3/POLR2C/COX5A/NDUFB6/TFAM/UQCR10/NDUFA1/POLR2E/HDAC2/POLR2H/SDHB/EP300/NDUFAB1/NDUFB1/NDUFV3/COX7A2/UQCRFS1/CREB3L2/NDUFA7/SOD1/NDUFB2/NDUFS3/NDUFS2/NDUFB10/NDUFB8/COX8A/SDHC/COX5B/SLC25A5/UQCR11/CLTB/NDUFA10/NDUFA6/DCTN4/PLCB1/UQCRB/RCOR1/COX6B1/CREB3/UQCRH/NDUFB9/COX7C/UQCRC1/SLC25A4/HDAC1/CREBBP/BBC…
KEGG_PARKINSONS_DISEASE	KEGG_PARKINSONS_DISEASE	KEGG_PARKINSONS_DISEASE	96	0.513907993813464	2.85498965001976	7.0802616311969e-16	6.26603154360925e-14	3.83824709480674e-14	6485	tags=74%, list=30%, signal=52%	NDUFC1/COX6A1/PINK1/NDUFS1/UBA1/UBE2L3/NDUFC2/COX7A2L/SDHA/NDUFB4/NDUFA2/CYC1/NDUFV2/COX7B/NDUFB3/COX5A/NDUFB6/UQCR10/NDUFA1/SDHB/NDUFAB1/NDUFB1/NDUFV3/COX7A2/UQCRFS1/NDUFA7/NDUFB2/NDUFS3/NDUFS2/NDUFB10/NDUFB8/COX8A/SDHC/COX5B/SLC25A5/UQCR11/UBE2G1/NDUFA10/NDUFA6/UQCRB/UBE2J1/COX6B1/UQCRH/NDUFB9/PARK7/SNCA/COX7C/UQCRC1/SLC25A4/UBE2J2/NDUFS4/NDUFB5/NDUFV1/UQCRQ/UQCRC2/NDUFA4/NDUFA8/CYCS/COX6C/SLC2…
KEGG_OXIDATIVE_PHOSPHORYLATION	KEGG_OXIDATIVE_PHOSPHORYLATION	KEGG_OXIDATIVE_PHOSPHORYLATION	99	0.500571266145251	2.78732292569235	3.74870831875983e-15	2.2117379080683e-13	1.35479633976233e-13	3483	tags=59%, list=16%, signal=49%	NDUFC1/COX6A1/NDUFS1/PPA2/ATP6V0A1/NDUFC2/COX7A2L/SDHA/NDUFB4/NDUFA2/CYC1/NDUFV2/COX7B/NDUFB3/COX5A/NDUFB6/UQCR10/NDUFA1/COX17/ATP6V1A/ATP6AP1/SDHB/NDUFAB1/NDUFB1/NDUFV3/COX7A2/UQCRFS1/NDUFA7/NDUFB2/NDUFS3/NDUFS2/NDUFB10/NDUFB8/COX8A/SDHC/COX5B/ATP6V1B2/ATP6V1H/UQCR11/ATP6V1F/NDUFA10/NDUFA6/UQCRB/COX6B1/UQCRH/ATP6V1D/NDUFB9/ATP6V1G1/COX15/COX7C/UQCRC1/NDUFA11/NDUFS4/NDUFB5/NDUFV1/UQCRQ/UQCRC2/ATP…
KEGG_SPLICEOSOME	KEGG_SPLICEOSOME	KEGG_SPLICEOSOME	118	0.465815981383571	2.66150435849813	8.65063416929285e-15	3.82790561991209e-13	2.34477715641359e-13	7630	tags=78%, list=36%, signal=50%	TXNL4A/SNRPB/SRSF8/SRSF5/WBP11/LSM4/SF3B6/NCBP2/CRNKL1/PRPF18/PUF60/HNRNPU/HNRNPC/DHX15/SF3A1/PRPF8/BCAS2/PRPF40A/DDX46/LSM3/SNRPD1/SF3B5/CWC15/PRPF31/PCBP1/SF3B3/SNRPC/SF3B4/U2AF1/DHX16/SNRPD3/HSPA8/SRSF6/SNRPG/ZMAT2/PRPF6/LSM8/SNRPE/EIF4A3/U2SURP/CTNNBL1/SRSF1/PRPF19/PLRG1/SART1/SF3B1/SRSF4/THOC1/TCERG1/HNRNPK/ACIN1/U2AF2/LSM5/CDC5L/SF3B2/SNRNP70/PPIH/THOC2/USP39/SNRPA/SNRNP27/SNRNP40/RBM17/SNR…
KEGG_UBIQUITIN_MEDIATED_PROTEOLYSIS	KEGG_UBIQUITIN_MEDIATED_PROTEOLYSIS	KEGG_UBIQUITIN_MEDIATED_PROTEOLYSIS	127	0.413042171430795	2.38304275882515	1.87029677998917e-11	6.62085060116165e-10	4.05559091239756e-10	10319	tags=83%, list=48%, signal=43%	UBA1/UBE2D4/UBE2L3/UBE2E1/UBE4A/FZR1/WWP1/UBE2B/TRIM37/UBE4B/NEDD4L/UBE2Z/UBE2H/UBE2K/BIRC6/STUB1/KLHL9/UBE2N/RNF7/PIAS2/ANAPC10/UBE2I/DDB1/WWP2/UBE2Q2/ANAPC13/UBE2G1/ANAPC5/CUL3/CUL5/CUL4B/UBE2J1/BTRC/CDC26/ANAPC11/UBR5/ANAPC1/TRIP12/UBE2J2/UBE3B/UBE2S/KEAP1/SMURF2/CUL4A/CDC23/RBX1/BIRC2/PRPF19/TRAF6/RCHY1/SMURF1/UBA3/SAE1/CUL2/DET1/UBE3C/PIAS1/HERC2/CDC16/ANAPC2/UBE2M/HERC4/UBA2/PPIL2/HERC1/UBE…
KEGG_ALZHEIMERS_DISEASE	KEGG_ALZHEIMERS_DISEASE	KEGG_ALZHEIMERS_DISEASE	141	0.38220452915946	2.23185031460231	1.79282146252649e-10	5.28882331445315e-09	3.23965983579349e-09	7213	tags=65%, list=34%, signal=43%	NDUFC1/COX6A1/NDUFS1/NDUFC2/COX7A2L/SDHA/NDUFB4/NDUFA2/CYC1/NDUFV2/COX7B/NDUFB3/COX5A/NDUFB6/UQCR10/NDUFA1/SDHB/CHP1/NDUFAB1/NDUFB1/NDUFV3/COX7A2/UQCRFS1/NDUFA7/NDUFB2/NDUFS3/NDUFS2/ADAM10/NDUFB10/NDUFB8/CALM1/COX8A/SDHC/COX5B/GSK3B/FADD/UQCR11/MAPK1/PSEN2/NDUFA10/NDUFA6/PLCB1/UQCRB/COX6B1/UQCRH/NDUFB9/SNCA/MAPK3/IDE/COX7C/UQCRC1/BAD/GNAQ/CACNA1D/NDUFS4/HSD17B10/NDUFB5/NDUFV1/EIF2AK3/UQCRQ/UQCRC2…
KEGG_PROTEIN_EXPORT	KEGG_PROTEIN_EXPORT	KEGG_PROTEIN_EXPORT	22	0.69384243456616	2.85566145208668	4.56497400246783e-09	1.15428628348115e-07	7.07056123690506e-08	5704	tags=95%, list=27%, signal=70%	HSPA5/SRP54/SEC61B/SEC63/SEC11C/SPCS1/SRP14/SRP68/SEC61G/SEC62/SRP9/SRP19/SEC11A/SPCS2/IMMP2L/SEC61A1/SRPRB/SRP72/OXA1L/SPCS3/IMMP1L
KEGG_RIBOSOME	KEGG_RIBOSOME	KEGG_RIBOSOME	83	0.427994755177074	2.33360556378822	7.43424954467722e-09	1.64482771175983e-07	1.00753645144968e-07	10370	tags=88%, list=49%, signal=45%	MRPL13/RPL7A/RPS27L/RPL26L1/RPS4Y1/RPL23A/RPS23/RPS29/RPL18/RPL12/RPL38/RPL3/RPL8/RPL23/RPL15/RPS6/RPLP0/RPS8/RPL41/RPS17/RPS3/RPL10A/RPL19/RPL37A/RPS18/RPS2/RPL27A/RPL10/FAU/RPL22/UBA52/RPS16/RPL24/RPS15/RPL14/RPL36A/RPL29/RPL11/RPL13/RPL35/RPL6/RPS21/RPS9/RPL9/RPS27A/RPS7/RPS28/RPS15A/RPL30/RPL35A/RPL31/RPS5/RPL39/RPL5/RPS12/RPL13A/RPS24/RPS25/RPLP1/RPL7/RPL32/RPL17/RPS19/RPS3A/RPSA/RPL36/RPL22…
KEGG_PROTEASOME	KEGG_PROTEASOME	KEGG_PROTEASOME	40	0.562781372391877	2.71227803718865	9.98102374180754e-09	1.96293466922215e-07	1.20239233380839e-07	3856	tags=68%, list=18%, signal=55%	PSMB5/PSMD3/PSMD12/PSMA1/PSMD7/PSMB2/PSMA7/POMP/PSMB1/PSMD11/PSMD6/PSMD8/PSMA2/PSMB7/PSMD14/PSMA3/PSMB6/PSMC5/PSMD4/PSMA5/PSMA4/PSMD13/PSMB4/PSMB3/PSMD1/PSMC2/PSMF1
KEGG_RNA_DEGRADATION	KEGG_RNA_DEGRADATION	KEGG_RNA_DEGRADATION	54	0.494141100881937	2.52081847950703	7.15721961311151e-08	1.26682787152074e-06	7.75993284368932e-07	9226	tags=91%, list=43%, signal=52%	CNOT1/LSM4/CNOT6/PATL1/EXOSC7/CNOT7/EDC4/PAPOLA/CNOT6L/LSM1/LSM3/PNPT1/SKIV2L/XRN1/EXOSC3/HSPD1/LSM8/HSPA9/MPHOSPH6/C1D/WDR61/XRN2/CNOT3/DCP1A/CNOT10/TTC37/EXOSC1/CNOT2/DCP2/DCPS/EDC3/LSM5/CNOT8/EXOSC5/EXOSC4/LSM6/PARN/EXOSC8/PAPOLG/LSM7/EXOSC2/CNOT4/DDX6/EXOSC6/EXOSC9/DIS3/ENO3/ZCCHC7/DCP1B
KEGG_VALINE_LEUCINE_AND_ISOLEUCINE_DEGRADATION	KEGG_VALINE_LEUCINE_AND_ISOLEUCINE_DEGRADATION	KEGG_VALINE_LEUCINE_AND_ISOLEUCINE_DEGRADATION	43	0.509424908816136	2.49631662672889	9.63486574199705e-08	1.55033748757589e-06	9.49656623373872e-07	8793	tags=86%, list=41%, signal=51%	ALDH3A2/PCCA/ALDH6A1/ACAT1/AUH/ECHS1/BCAT2/HMGCL/HIBADH/MCEE/HADHA/IVD/MCCC1/ACAT2/HMGCS2/DLD/HADH/ALDH7A1/HADHB/HSD17B10/ACADM/PCCB/ACAA1/MCCC2/ACAD8/BCKDHB/ALDH2/OXCT1/HMGCS1/BCKDHA/DBT/ACADSB/BCAT1/AOX1/EHHADH/HIBCH/ABAT
KEGG_ENDOCYTOSIS	KEGG_ENDOCYTOSIS	KEGG_ENDOCYTOSIS	171	0.320153229287009	1.91214044548258	5.0660301414785e-07	7.47239445868079e-06	4.57720267168672e-06	11150	tags=76%, list=52%, signal=37%	RNF41/RAB11FIP1/TSG101/AP2A2/PDCD6IP/STAM/WWP1/CLTC/RAB4A/CHMP2A/NEDD4L/AGAP1/RAB11A/VPS25/CHMP3/VPS4B/USP8/RAB5A/CLTB/DNM1L/SNF8/PRKCI/PLD2/ARFGAP2/CHMP1B/FGFR3/RAB11FIP3/IQSEC1/VPS37C/EPS15/PSD3/PIP5K1A/ADRB2/CHMP4B/VPS28/HSPA8/ERBB3/VPS37A/ARF6/SMURF2/RABEP1/EPN2/STAMBP/TRAF6/RAB5B/SMURF1/PRKCZ/PIP4K2B/ASAP3/AP2M1/AP2S1/CHMP5/SH3GLB2/VTA1/SH3GL3/STAM2/CLTA/DNAJC6/IGF1R/RUFY1/CHMP2B/EEA1/PARD3/…
KEGG_PEROXISOME	KEGG_PEROXISOME	KEGG_PEROXISOME	78	0.389655239217387	2.10776572511765	4.74004182890435e-06	6.45374925935439e-05	3.95323326621173e-05	10204	tags=79%, list=48%, signal=42%	PEX10/ECH1/ACOT8/PRDX1/EPHX2/PEX7/SOD1/HMGCL/PXMP2/ACSL3/ECI2/PEX1/PEX11B/GNPAT/PXMP4/PEX2/CRAT/PEX19/ABCD3/PEX3/MPV17L/MLYCD/ACAA1/NUDT19/PEX26/DAO/PAOX/PEX11A/CAT/PEX13/HACL1/SLC25A17/ABCD4/SCP2/ACOX3/PMVK/PEX14/SLC27A2/ACSL1/PEX5/DHRS4/PEX16/PHYH/IDH2/IDH1/PIPOX/ACOX1/ACSL6/EHHADH/MVK/ABCD1/PRDX5/XDH/FAR2/FAR1/HSD17B4/AMACR/CROT/NUDT12/ACSL5/MPV17/PEX6
KEGG_NUCLEOTIDE_EXCISION_REPAIR	KEGG_NUCLEOTIDE_EXCISION_REPAIR	KEGG_NUCLEOTIDE_EXCISION_REPAIR	44	0.458462544182059	2.24852572099521	7.2716822380901e-06	9.19348397244248e-05	5.63145316182918e-05	8882	tags=84%, list=42%, signal=49%	RFC5/CCNH/GTF2H5/DDB1/ERCC3/CDK7/XPA/CUL4B/RPA1/RPA2/CUL4A/RBX1/POLD4/ERCC5/RFC1/GTF2H3/POLD2/RAD23B/RPA3/MNAT1/LIG1/POLE4/RFC4/RAD23A/ERCC6/RFC3/POLE2/POLD1/POLE/GTF2H1/GTF2H4/ERCC1/XPC/POLD3/ERCC8/POLE3/ERCC2
KEGG_PURINE_METABOLISM	KEGG_PURINE_METABOLISM	KEGG_PURINE_METABOLISM	147	0.302805295939234	1.77757276472396	1.66155375631966e-05	0.000196063343245719	0.000120098271509421	10037	tags=69%, list=47%, signal=37%	NT5C2/NME4/NME3/POLR2C/POLR2E/POLR2H/PRPS1/ADCY6/PDE8B/ADSL/PAICS/POLR1D/PNPT1/NUDT9/DGUOK/POLA2/PDE6G/APRT/CANT1/GART/PDE1B/AK2/POLR3B/POLR3H/PDE3B/ENPP3/POLD4/GUK1/POLR1C/NUDT5/POLR2G/POLR2I/ITPA/POLD2/POLR3K/ENTPD6/PRIM2/GMPR2/GMPS/POLR2J/POLR2F/NME1/AMPD3/PKM/NT5C1B/PDE11A/ADK/IMPDH2/ATIC/POLE4/POLR2L/ENPP1/ADCY3/RRM2B/IMPDH1/ADCY1/POLR3A/FHIT/PDE6D/PNP/PDE9A/PRPS2/ENTPD4/PDE8A/ENTPD3/PDE5A/P…
KEGG_CITRATE_CYCLE_TCA_CYCLE	KEGG_CITRATE_CYCLE_TCA_CYCLE	KEGG_CITRATE_CYCLE_TCA_CYCLE	30	0.508140476137421	2.28445818622451	1.88202311106514e-05	0.000208198806661582	0.000127531829236651	6846	tags=77%, list=32%, signal=52%	MDH1/SDHA/CS/MDH2/SDHB/ACLY/SUCLA2/IDH3G/SDHC/PDHB/DLST/ACO2/SUCLG2/DLD/DLAT/PCK2/SUCLG1/IDH3A/OGDH/IDH3B/FH/IDH2/IDH1
KEGG_OOCYTE_MEIOSIS	KEGG_OOCYTE_MEIOSIS	KEGG_OOCYTE_MEIOSIS	108	0.331682411108276	1.86880657582347	3.17114252294084e-05	0.000316894257635132	0.000194113045116971	6360	tags=53%, list=30%, signal=37%	REC8/YWHAG/PPP2R5D/CHP1/ADCY6/MAP2K1/YWHAQ/RPS6KA2/PPP2CB/ANAPC10/CALM1/MAPK1/ANAPC13/PRKACB/RPS6KA3/ANAPC5/BTRC/CDC26/ANAPC11/PPP2CA/CCNB2/MAPK3/ANAPC1/CAMK2B/CAMK2G/YWHAZ/SMC1A/CCNB1/CDC23/RBX1/CAMK2D/CCNE2/CDC16/ANAPC2/YWHAE/PPP2R1A/RPS6KA1/PPP3CC/IGF1R/PPP3CA/YWHAB/PPP2R5C/SMC3/PPP1CB/CPEB1/CUL1/ADCY3/ANAPC7/PPP2R5B/ADCY1/CCNE1/SLK/FBXW11/PRKX/PPP1CA/PKMYT1/PPP3R1
KEGG_VASOPRESSIN_REGULATED_WATER_REABSORPTION	KEGG_VASOPRESSIN_REGULATED_WATER_REABSORPTION	KEGG_VASOPRESSIN_REGULATED_WATER_REABSORPTION	44	0.441158511502566	2.16365823716139	3.22265346747592e-05	0.000316894257635132	0.000194113045116971	6419	tags=64%, list=30%, signal=45%	DYNLL2/DYNC1H1/ADCY6/RAB11A/CREB3L2/DCTN6/RAB5A/PRKACB/DYNC1LI2/DCTN4/DYNC1I2/CREB3/DYNC1LI1/CREB3L4/GNAS/RAB5B/AQP3/DCTN2/STX4/DYNC2LI1/VAMP2/DYNLL1/ADCY3/RAB5C/PRKX/DYNC2H1/DCTN1/ARHGDIA
KEGG_PYRIMIDINE_METABOLISM	KEGG_PYRIMIDINE_METABOLISM	KEGG_PYRIMIDINE_METABOLISM	92	0.340057407494904	1.87605	6.83164619156769e-05	0.000636421776793411	0.00038983909015594	10260	tags=75%, list=48%, signal=39%	NT5C2/NME4/NME3/POLR2C/POLR2E/POLR2H/UPRT/CTPS2/UMPS/POLR1D/DCTD/UCKL1/PNPT1/POLA2/CANT1/POLR3B/POLR3H/POLD4/POLR1C/AK3/CMPK1/POLR2G/POLR2I/ITPA/POLD2/POLR3K/ENTPD6/PRIM2/POLR2J/POLR2F/NME1/NT5C1B/POLE4/POLR2L/UCK1/UPB1/RRM2B/POLR3A/PNP/ENTPD4/ENTPD3/POLR2B/POLR2K/POLR3F/TXNRD1/POLE2/TK2/NME5/POLD1/POLE/POLR3C/RRM1/POLR3D/DPYS/POLR1A/NT5C1A/POLD3/POLR2A/CTPS1/POLE3/POLR3G/NT5C3A/NME6/DHODH/POLR2D…
KEGG_RENAL_CELL_CARCINOMA	KEGG_RENAL_CELL_CARCINOMA	KEGG_RENAL_CELL_CARCINOMA	66	0.371291144976892	1.9583718781006	9.58961585874447e-05	0.000848681003498886	0.000519858122868779	5957	tags=58%, list=28%, signal=42%	FLCN/AKT3/EP300/CRK/MAP2K1/PIK3R3/GAB1/RAF1/PIK3CA/MAPK1/PIK3CB/RAC1/PAK2/MAPK3/ARNT/SOS2/ARAF/CREBBP/ARNT2/RBX1/AKT1/NRAS/SLC2A1/CUL2/BRAF/PAK4/HGF/KRAS/CRKL/RAP1B/PIK3R2/EGLN2/AKT2/CDC42/PTPN11/VEGFC/SOS1/FH
KEGG_ERBB_SIGNALING_PATHWAY	KEGG_ERBB_SIGNALING_PATHWAY	KEGG_ERBB_SIGNALING_PATHWAY	86	0.337153329429589	1.84417249411462	0.000104450108554044	0.000880365200669798	0.000539266224614863	4657	tags=45%, list=22%, signal=36%	ABL1/NRG1/AKT3/CRK/MAP2K1/PIK3R3/MTOR/GAB1/RAF1/GSK3B/PIK3CA/MAPK1/CDKN1B/BTC/PIK3CB/MAP2K4/PAK2/MAPK3/ERBB2/CAMK2B/NCK2/CAMK2G/SOS2/ARAF/ERBB3/MAPK9/BAD/CAMK2D/AKT1/RPS6KB1/NRAS/PTK2/BRAF/PAK4/KRAS/CRKL/MAPK10/PIK3R2/AKT2
KEGG_AMINO_SUGAR_AND_NUCLEOTIDE_SUGAR_METABOLISM	KEGG_AMINO_SUGAR_AND_NUCLEOTIDE_SUGAR_METABOLISM	KEGG_AMINO_SUGAR_AND_NUCLEOTIDE_SUGAR_METABOLISM	41	0.428863153684041	2.07993095447967	0.000110851299010781	0.000891849087495826	0.00054630066019667	7911	tags=71%, list=37%, signal=45%	HEXB/GALT/CMAS/GFPT1/GPI/CYB5R1/PGM3/GNPNAT1/HK1/PMM1/NAGK/GNPDA2/MPI/UGP2/GNPDA1/NANS/NANP/UXS1/GNE/UGDH/GALK2/PGM2/UAP1/HEXA/FPGT/CYB5R3/GMPPA/PMM2/GALE
KEGG_MTOR_SIGNALING_PATHWAY	KEGG_MTOR_SIGNALING_PATHWAY	KEGG_MTOR_SIGNALING_PATHWAY	50	0.400948767648032	2.01710985733388	0.000124940078110091	0.000961495383716786	0.000588962381937728	7250	tags=66%, list=34%, signal=44%	PRKAA2/CAB39L/AKT3/RPS6KA2/PIK3R3/MTOR/CAB39/PIK3CA/MAPK1/RPS6KA3/PIK3CB/MAPK3/AKT1/RPS6KB1/EIF4E/RICTOR/BRAF/RPS6KA1/EIF4B/TSC1/PIK3R2/AKT2/RPS6/ULK2/VEGFC/MLST8/RHEB/ULK1/TSC2/ULK3/EIF4E2/PRKAA1/PIK3R5
KEGG_PROPANOATE_METABOLISM	KEGG_PROPANOATE_METABOLISM	KEGG_PROPANOATE_METABOLISM	31	0.461723097691681	2.09533038335856	0.00013288047634504	0.000979993513044669	0.000600293379979786	3944	tags=55%, list=19%, signal=45%	ALDH3A2/PCCA/ALDH6A1/ACAT1/ACSS1/ECHS1/SUCLA2/MCEE/HADHA/SUCLG2/ACAT2/ALDH7A1/ACACA/ACADM/PCCB/MLYCD/SUCLG1
KEGG_PROGESTERONE_MEDIATED_OOCYTE_MATURATION	KEGG_PROGESTERONE_MEDIATED_OOCYTE_MATURATION	KEGG_PROGESTERONE_MEDIATED_OOCYTE_MATURATION	84	0.345473193033003	1.88525036458123	0.00015092462679428	0.00106526913594839	0.000652528819522354	5506	tags=51%, list=26%, signal=38%	HSP90AB1/FZR1/AKT3/ADCY6/MAP2K1/RPS6KA2/PIK3R3/ANAPC10/RAF1/PIK3CA/MAPK1/ANAPC13/PRKACB/RPS6KA3/PIK3CB/ANAPC5/CDC26/ANAPC11/CCNB2/MAPK3/ANAPC1/ARAF/MAPK9/CCNB1/CDC23/PDE3B/AKT1/GNAI1/BRAF/CDC16/ANAPC2/KRAS/RPS6KA1/CCNA2/IGF1R/MAPK10/PIK3R2/AKT2/CPEB1/ADCY3/ANAPC7/ADCY1/GNAI3
KEGG_LYSINE_DEGRADATION	KEGG_LYSINE_DEGRADATION	KEGG_LYSINE_DEGRADATION	39	0.421428690040118	2.02190608311496	0.000156480212060215	0.00106526913594839	0.000652528819522354	6769	tags=64%, list=32%, signal=44%	ALDH3A2/SETD7/ACAT1/ECHS1/AASDHPPT/AASDH/DLST/HADHA/ACAT2/ASH1L/HADH/ALDH7A1/GCDH/SETD1B/DOT1L/SUV39H2/AADAT/OGDH/ALDH2/PLOD3/SETDB2/PLOD2/EHMT2/EHMT1/PLOD1
KEGG_SNARE_INTERACTIONS_IN_VESICULAR_TRANSPORT	KEGG_SNARE_INTERACTIONS_IN_VESICULAR_TRANSPORT	KEGG_SNARE_INTERACTIONS_IN_VESICULAR_TRANSPORT	37	0.431230714298115	2.04464228884226	0.00019629039682474	0.00128679260140663	0.000788222646118837	8971	tags=81%, list=42%, signal=47%	VAMP8/SNAP23/STX10/VTI1B/SEC22B/BNIP1/STX17/BET1L/SNAP29/BET1/STX16/STX4/GOSR1/STX7/VAMP2/STX3/STX2/STX18/STX12/USE1/STX8/STX5/VAMP7/STX6/VAMP3/VAMP1/YKT6/VAMP4/VAMP5/TSNARE1
KEGG_RIBOFLAVIN_METABOLISM	KEGG_RIBOFLAVIN_METABOLISM	KEGG_RIBOFLAVIN_METABOLISM	14	0.603181073194132	2.17769342482003	0.000261363862451876	0.00162706927235886	0.000996658549229631	5014	tags=79%, list=24%, signal=60%	ACP2/MTMR2/ACP1/ACP6/PHPT1/RFK/FLAD1/ENPP3/MTMR6/MTMR1/ENPP1
KEGG_INSULIN_SIGNALING_PATHWAY	KEGG_INSULIN_SIGNALING_PATHWAY	KEGG_INSULIN_SIGNALING_PATHWAY	134	0.296412265609729	1.72157231541759	0.00026658197117744	0.00162706927235886	0.000996658549229631	9873	tags=66%, list=46%, signal=36%	PRKAA2/PHKA2/FBP1/AKT3/CRK/PTPRF/MAP2K1/PIK3R3/MTOR/CALM1/RAF1/GSK3B/PIK3CA/MAPK1/PRKACB/PIK3CB/PRKAG1/GYS1/HK1/PRKCI/PHKA1/MAPK3/PYGL/MKNK1/SOS2/ACACA/ARAF/MAPK9/SOCS4/BAD/PDE3B/AKT1/RPS6KB1/PRKCZ/NRAS/EIF4E/PRKAG2/PRKAR2A/BRAF/PCK2/PPP1R3D/KRAS/CRKL/MKNK2/EXOC7/TSC1/MAPK10/PIK3R2/AKT2/PYGB/INSR/RPS6/PPP1CB/FASN/INPP5K/RHEB/SOS1/PRKX/PPP1CA/PHKB/PPP1CC/MAPK8/GRB2/RHOQ/PTPN1/TSC2/FLOT2/EIF4E2/PRK…
KEGG_NEUROTROPHIN_SIGNALING_PATHWAY	KEGG_NEUROTROPHIN_SIGNALING_PATHWAY	KEGG_NEUROTROPHIN_SIGNALING_PATHWAY	122	0.297751595715253	1.70997611280098	0.000398731033087095	0.00235251309521386	0.00144102794413933	4781	tags=44%, list=22%, signal=35%	ABL1/YWHAG/ATF4/AKT3/CRK/MAP2K1/YWHAQ/RPS6KA2/MAGED1/PIK3R3/CALM1/GAB1/RAF1/GSK3B/PIK3CA/MAPK1/RELA/RPS6KA3/PIK3CB/RAC1/PRKCD/TP73/RIPK2/MAPK3/CAMK2B/CAMK2G/SOS2/YWHAZ/MAPK9/BAD/CAMK2D/AKT1/TRAF6/NRAS/IRAK1/KIDINS220/BRAF/MAP3K3/BAX/YWHAE/FOXO3/MAP2K5/KRAS/RPS6KA1/CRKL/TP53/YWHAB/RAP1B/MAPK10/MAPKAPK2/PIK3R2/AKT2/ZNF274/CDC42
KEGG_FATTY_ACID_METABOLISM	KEGG_FATTY_ACID_METABOLISM	KEGG_FATTY_ACID_METABOLISM	40	0.412001655247632	1.98560772554392	0.000576519590540528	0.00329174088792495	0.00201635035061713	8371	tags=70%, list=39%, signal=43%	ALDH3A2/ECI1/ACAT1/ECHS1/ACSL3/ECI2/CPT2/HADHA/ACAT2/ADH5/HADH/ALDH7A1/GCDH/HADHB/CPT1A/ACADM/ACADVL/ACAA1/ALDH2/ACOX3/ACSL1/CYP4A11/ACADL/ACADSB/ACOX1/ADH7/ACSL6/EHHADH
KEGG_ENDOMETRIAL_CANCER	KEGG_ENDOMETRIAL_CANCER	KEGG_ENDOMETRIAL_CANCER	52	0.363242541934024	1.83503972168441	0.00114584522199252	0.0063207826712769	0.00387178480607506	8880	tags=69%, list=42%, signal=40%	AKT3/MAP2K1/PIK3R3/MLH1/RAF1/GSK3B/PIK3CA/MAPK1/CDH1/CTNNA1/PIK3CB/MAPK3/ERBB2/SOS2/ARAF/BAD/AKT1/NRAS/BRAF/FOXO3/KRAS/APC/TP53/PIK3R2/AKT2/SOS1/EGF/GRB2/PIK3R5/AXIN1/EGFR/ELK1/HRAS/MAP2K2/AXIN2/TCF7L1
KEGG_RNA_POLYMERASE	KEGG_RNA_POLYMERASE	KEGG_RNA_POLYMERASE	27	0.440521311666508	1.92898061622087	0.00117845100650925	0.0063207826712769	0.00387178480607506	9633	tags=85%, list=45%, signal=47%	POLR2C/POLR2E/POLR2H/POLR1D/POLR3B/POLR3H/POLR1C/POLR2G/POLR2I/POLR3K/POLR2J/POLR2F/POLR2L/POLR3A/POLR2B/POLR2K/POLR3F/POLR3C/POLR3D/POLR1A/POLR2A/POLR3G/POLR2D
KEGG_N_GLYCAN_BIOSYNTHESIS	KEGG_N_GLYCAN_BIOSYNTHESIS	KEGG_N_GLYCAN_BIOSYNTHESIS	45	0.375172394356203	1.84746554208772	0.00130147491607237	0.00677532529837674	0.00415021412865182	9444	tags=76%, list=44%, signal=42%	DOLPP1/ALG5/ALG11/ALG8/B4GALT3/DPM3/TUSC3/ALG3/ALG6/GANAB/ALG2/MGAT4A/MAN2A2/DPAGT1/DAD1/DDOST/MGAT4B/DPM2/MGAT5/MAN1C1/B4GALT2/MAN1A2/MGAT2/RFT1/ALG1/RPN1/RPN2/STT3B/MGAT1/MOGS/STT3A/ALG9/ALG13/MAN2A1
KEGG_CHRONIC_MYELOID_LEUKEMIA	KEGG_CHRONIC_MYELOID_LEUKEMIA	KEGG_CHRONIC_MYELOID_LEUKEMIA	73	0.318231779578992	1.70453785582066	0.00139120931187374	0.00703554423433294	0.0043096108006916	9041	tags=64%, list=42%, signal=37%	ABL1/AKT3/HDAC2/CRK/MAP2K1/PIK3R3/BCR/CTBP1/RAF1/PIK3CA/MAPK1/CDKN1B/RELA/IKBKG/PIK3CB/MAPK3/HDAC1/SOS2/ARAF/BAD/BCL2L1/AKT1/SMAD4/NRAS/BRAF/KRAS/CRKL/CDK4/TP53/PIK3R2/AKT2/PTPN11/SOS1/STAT5B/RB1/CDK6/CHUK/GRB2/PIK3R5/E2F1/CBL/CTBP2/MDM2/HRAS/MAP2K2/SMAD3/TGFB2
KEGG_BASE_EXCISION_REPAIR	KEGG_BASE_EXCISION_REPAIR	KEGG_BASE_EXCISION_REPAIR	32	0.408828679947096	1.86770934100979	0.00144766837864073	0.00707534515054064	0.00433399078504719	9155	tags=78%, list=43%, signal=45%	UNG/MPG/LIG3/NTHL1/POLD4/PARP1/POLD2/HMGB1/PARP2/APEX1/LIG1/POLE4/MUTYH/SMUG1/TDG/PARP4/APEX2/POLE2/POLD1/POLE/POLB/POLD3/NEIL2/POLE3/PARP3
KEGG_PYRUVATE_METABOLISM	KEGG_PYRUVATE_METABOLISM	KEGG_PYRUVATE_METABOLISM	40	0.396311608250219	1.90999084843821	0.0014790269523729	0.00707534515054064	0.00433399078504719	4895	tags=50%, list=23%, signal=39%	ALDH3A2/MDH1/ACAT1/ACSS1/MDH2/GRHPR/PDHB/HAGHL/ME2/ACAT2/DLD/ALDH7A1/ACACA/DLAT/GLO1/HAGH/PCK2/PKM/ALDH2/ACYP2
KEGG_TERPENOID_BACKBONE_BIOSYNTHESIS	KEGG_TERPENOID_BACKBONE_BIOSYNTHESIS	KEGG_TERPENOID_BACKBONE_BIOSYNTHESIS	15	0.534833338789626	1.96622496198713	0.00163580985898723	0.00761943013265104	0.00466726912675026	5158	tags=73%, list=24%, signal=56%	ACAT1/GGPS1/FDPS/ACAT2/HMGCR/HMGCS2/IDI2/DHDDS/IDI1/PDSS1/PMVK
KEGG_PROSTATE_CANCER	KEGG_PROSTATE_CANCER	KEGG_PROSTATE_CANCER	88	0.288142149542092	1.58190362931969	0.00331464459934698	0.0150433870278055	0.00921480145027635	9454	tags=62%, list=44%, signal=35%	HSP90AB1/ATF4/KLK3/AKT3/EP300/MAP2K1/CREB3L2/PIK3R3/MTOR/RAF1/GSK3B/PIK3CA/MAPK1/CDKN1B/RELA/IKBKG/PIK3CB/CREB3/MAPK3/ERBB2/SOS2/ARAF/CREBBP/CREB3L4/BAD/AKT1/NRAS/BRAF/PDGFA/CCNE2/KRAS/IGF1R/TP53/PIK3R2/AKT2/HSP90B1/CCNE1/SOS1/EGF/RB1/CHUK/GRB2/CREB1/PIK3R5/E2F1/EGFR/PDGFB/MDM2/HRAS/HSP90AA1/MAP2K2/TCF7L1/FOXO1/PDGFRB/IKBKB
KEGG_PANCREATIC_CANCER	KEGG_PANCREATIC_CANCER	KEGG_PANCREATIC_CANCER	69	0.313642735059295	1.66416213157889	0.00351034944823018	0.0155332963084186	0.00951489455704497	9994	tags=71%, list=47%, signal=38%	AKT3/MAP2K1/PIK3R3/RAF1/PIK3CA/MAPK1/RELA/IKBKG/PIK3CB/RAC1/MAPK3/ERBB2/ARAF/MAPK9/BAD/BCL2L1/AKT1/SMAD4/RALB/BRAF/RALBP1/KRAS/CDK4/TP53/MAPK10/PIK3R2/AKT2/CDC42/PLD1/RALGDS/VEGFC/RALA/EGF/RB1/CDK6/MAPK8/CHUK/PIK3R5/E2F1/EGFR/RAC3/JAK1/VEGFB/SMAD3/TGFB2/IKBKB/RAD51/CASP9/STAT3
KEGG_BUTANOATE_METABOLISM	KEGG_BUTANOATE_METABOLISM	KEGG_BUTANOATE_METABOLISM	33	0.380923085448907	1.75515737342013	0.0050576582977482	0.0214779805428306	0.0131563008974817	4778	tags=48%, list=22%, signal=38%	ALDH3A2/ACAT1/ECHS1/HMGCL/PDHB/HADHA/ALDH5A1/ACAT2/BDH1/HMGCS2/HADH/ALDH7A1/AACS/L2HGDH/ACSM5/ALDH2
KEGG_MATURITY_ONSET_DIABETES_OF_THE_YOUNG	KEGG_MATURITY_ONSET_DIABETES_OF_THE_YOUNG	KEGG_MATURITY_ONSET_DIABETES_OF_THE_YOUNG	21	-0.345654	-1.87873	0.00509646995931574	0.0214779805428306	0.0131563008974817	13955	tags=100%, list=65%, signal=35%	NR5A2/PDX1/HNF1B/HNF4A/ONECUT1/HES1/NEUROD1/PAX4/NEUROG3/INS/PKLR/HNF1A/FOXA2/HHEX/HNF4G/GCK/MNX1/SLC2A2/PAX6/IAPP
KEGG_TIGHT_JUNCTION	KEGG_TIGHT_JUNCTION	KEGG_TIGHT_JUNCTION	128	0.263695646702986	1.52342953668564	0.00539123635998424	0.0221918333887723	0.0135935702589566	6321	tags=46%, list=30%, signal=33%	MPP5/TJP1/AKT3/CTTN/RAB3B/PPP2CB/AMOTL1/CSNK2A1/CGN/TJP2/CTNNA1/CSNK2B/IGSF5/PRKCD/PRKCI/CLDN14/ASH1L/PPP2CA/YES1/TJAP1/MYH9/EPB41/MAGI3/AKT1/VAPA/PRKCZ/MYH10/MYL12A/PPP2R2A/NRAS/MAGI2/ACTN4/GNAI1/MYL12B/CLDN7/CASK/PPP2R1A/KRAS/PPP2R2D/PARD3/CSNK2A2/CDK4/AKT2/PRKCH/OCLN/CDC42/SPTAN1/RAB13/CLDN3/ACTN2/LLGL2/CLDN22/GNAI3/SYMPK/PARD6B/RHOA/EXOC4/PPP2R2C/CLDN20
KEGG_LYSOSOME	KEGG_LYSOSOME	KEGG_LYSOSOME	120	0.269997768695689	1.54579799429846	0.00576304005991317	0.0231831384228325	0.0142007924921305	9538	tags=62%, list=45%, signal=35%	HEXB/ATP6V0A1/PPT1/CLTC/ATP6AP1/ACP2/SLC17A5/NAGPA/ATP6V1H/M6PR/NEU1/NPC1/AP3M1/CLTB/AP1G1/GNPTG/CTSO/DNASE2/CLN3/AP1B1/SCARB2/NAGLU/AP3B1/AGA/CD164/FUCA1/MCOLN1/SMPD1/AP3D1/GALC/GAA/AP1M2/ATP6V0D1/GGA1/SUMF1/CLTA/IGF2R/SGSH/ASAH1/AP3S2/CLN5/ARSG/ATP6V0B/HGSNAT/PSAPL1/CTNS/AP4B1/GLB1/AP3M2/GGA3/PLA2G15/ENTPD4/TPP1/ABCA2/ATP6V0C/AP1M1/HEXA/AP1S1/IDUA/GNS/CTSG/LAMP1/LIPA/CTSV/CLTCL1/AP3B2/AP3S1/SOR…
KEGG_ADIPOCYTOKINE_SIGNALING_PATHWAY	KEGG_ADIPOCYTOKINE_SIGNALING_PATHWAY	KEGG_ADIPOCYTOKINE_SIGNALING_PATHWAY	66	0.300185695715626	1.58332681145448	0.00789392714188724	0.0310494467580898	0.0190192864471201	10898	tags=71%, list=51%, signal=35%	CAMKK1/PRKAA2/AKT3/ADIPOR2/ADIPOR1/MTOR/ACSL3/RELA/IKBKG/PRKAG1/MAPK9/AKT1/CPT1A/SLC2A1/PRKAG2/PPARA/PCK2/MAPK10/AKT2/PTPN11/ACSL1/RXRA/MAPK8/CHUK/PRKAA1/IRS1/NPY/PRKAB2/TRADD/CAMKK2/ACSL6/RXRB/TNF/NFKBIB/JAK2/PRKAG3/NFKBIE/IKBKB/STK11/IRS4/LEPR/STAT3/ACSL5/TRAF2/TNFRSF1A/G6PC2/NFKB1
KEGG_FC_GAMMA_R_MEDIATED_PHAGOCYTOSIS	KEGG_FC_GAMMA_R_MEDIATED_PHAGOCYTOSIS	KEGG_FC_GAMMA_R_MEDIATED_PHAGOCYTOSIS	91	0.27753733890433	1.52912821397956	0.0081536660554352	0.0313738889524354	0.0192180229681882	5308	tags=41%, list=25%, signal=31%	SCIN/ARPC5L/AKT3/CRK/MAP2K1/PIK3R3/ARPC1A/RAF1/PIK3CA/MAPK1/WASF3/PIK3CB/DNM1L/RAC1/PRKCD/PLD2/PIP5K1A/MAPK3/ARF6/AKT1/ARPC3/RPS6KB1/PIP4K2B/ASAP3/MARCKSL1/CRKL/DNM2/PIK3R2/AKT2/CDC42/PLA2G4F/PLD1/ARPC2/WASF2/VAV2/CFL1/WASL
KEGG_GLYCEROPHOSPHOLIPID_METABOLISM	KEGG_GLYCEROPHOSPHOLIPID_METABOLISM	KEGG_GLYCEROPHOSPHOLIPID_METABOLISM	66	0.296881279780984	1.56589769867466	0.00879606436932034	0.0331256041142489	0.0202910331475923	8684	tags=56%, list=41%, signal=33%	DGKD/LPCAT3/PCYT2/PLA2G12A/CDS2/PLD2/GNPAT/ETNK2/CDIPT/GPD2/AGPAT2/PTDSS1/LCLAT1/AGPAT3/PEMT/PCYT1A/AGPAT1/CHKB/LYPLA2/MBOAT2/CDS1/CRLS1/MBOAT1/PLD1/LYPLA1/PLA2G15/GPAM/DGKQ/GPD1L/PLA2G6/CHKA/DGKA/ADPRM/PCYT1B/TAZ/DGKE/PLA2G2D
KEGG_AUTOIMMUNE_THYROID_DISEASE	KEGG_AUTOIMMUNE_THYROID_DISEASE	KEGG_AUTOIMMUNE_THYROID_DISEASE	30	-0.265362	-1.58099	0.00907113100273141	0.0334497955725721	0.020489616080731	11910	tags=90%, list=56%, signal=40%	TSHB/TG/IFNA14/PRF1/IFNA17/CTLA4/FASLG/CD28/IFNA7/IFNA5/CD86/TPO/IFNA8/FAS/CGA/IL4/IFNA16/IFNA10/IFNA4/IL5/IFNA1/CD40LG/IL2/IFNA21/IL10/GZMB/IFNA2
KEGG_BASAL_TRANSCRIPTION_FACTORS	KEGG_BASAL_TRANSCRIPTION_FACTORS	KEGG_BASAL_TRANSCRIPTION_FACTORS	33	0.365981058949393	1.68630985803903	0.00954450021674436	0.0344770722115051	0.0211188726600359	8487	tags=70%, list=40%, signal=42%	STON1/GTF2A2/TAF7/GTF2I/GTF2B/GTF2IRD1/GTF2E2/TBPL1/TAF2/GTF2H3/TAF6L/TAF1/TAF6/TAF9B/GTF2A1/TAF4B/TAF13/TAF11/GTF2E1/GTF2H1/GTF2H4/TAF10/TAF5L
KEGG_GLIOMA	KEGG_GLIOMA	KEGG_GLIOMA	63	0.293794145207914	1.53414223764461	0.0100291561021431	0.0355032126015865	0.0217474332320155	7883	tags=56%, list=37%, signal=35%	AKT3/MAP2K1/PIK3R3/MTOR/CALM1/RAF1/PIK3CA/MAPK1/PIK3CB/MAPK3/CAMK2B/CAMK2G/SOS2/ARAF/CAMK2D/AKT1/NRAS/BRAF/PDGFA/KRAS/IGF1R/CDK4/TP53/PIK3R2/AKT2/SOS1/EGF/RB1/CDK6/GRB2/PIK3R5/E2F1/EGFR/PDGFB/MDM2
KEGG_EPITHELIAL_CELL_SIGNALING_IN_HELICOBACTER_PYLORI_INFECTION	KEGG_EPITHELIAL_CELL_SIGNALING_IN_HELICOBACTER_PYLORI_INFECTION	KEGG_EPITHELIAL_CELL_SIGNALING_IN_HELICOBACTER_PYLORI_INFECTION	68	0.288371182149633	1.52667330363789	0.0105897021556059	0.0367524957165144	0.0225126795052096	11264	tags=74%, list=53%, signal=35%	ATP6V0A1/TJP1/ATP6V1A/ATP6AP1/ADAM10/ATP6V1B2/ATP6V1H/RELA/ATP6V1F/IKBKG/MAP2K4/IGSF5/RAC1/ATP6V1D/ATP6V1G1/MAPK9/ATP6V0D1/ATP6V0B/MAPK10/ATP6V1G2/CDC42/PTPN11/ATP6V0E1/JAM3/MAPK8/CHUK/ATP6V0C/MET/PTPRZ1/NOD1/ADAM17/GIT1/EGFR/ATP6V1C1/MAPK14/F11R/ATP6V1E1/IKBKB/JUN/CASP3/MAPK13/JAM2/ATP6V1E2/ATP6V0A2/CSK/ATP6V0E2/NFKB1/ATP6V1B1/MAP3K14/PLCG1
KEGG_COLORECTAL_CANCER	KEGG_COLORECTAL_CANCER	KEGG_COLORECTAL_CANCER	62	0.308752779660264	1.60869712794384	0.0112130426676531	0.0381674721572037	0.023379420946726	9948	tags=69%, list=47%, signal=37%	AKT3/MAP2K1/PIK3R3/MLH1/APPL1/RAF1/GSK3B/PIK3CA/MAPK1/PIK3CB/RAC1/MAPK3/ARAF/MAPK9/BAD/AKT1/SMAD4/BRAF/BAX/KRAS/APC/TP53/CYCS/MAPK10/PIK3R2/AKT2/RALGDS/RHOA/MSH6/BIRC5/MAPK8/PIK3R5/AXIN1/MSH2/RAC3/AXIN2/TCF7L1/SMAD3/TGFB2/JUN/CASP3/CASP9/MSH3
KEGG_GRAFT_VERSUS_HOST_DISEASE	KEGG_GRAFT_VERSUS_HOST_DISEASE	KEGG_GRAFT_VERSUS_HOST_DISEASE	20	-0.325162	-1.69071	0.0116774090323084	0.0383665409111982	0.0235013601775404	14391	tags=100%, list=68%, signal=33%	CD80/TNF/KIR3DL1/PRF1/KIR2DL3/KLRC1/FASLG/KIR2DL5A/CD28/IL1A/IL1B/IFNG/CD86/FAS/KIR2DL2/KIR2DL1/IL2/GZMB/IL6
KEGG_FRUCTOSE_AND_MANNOSE_METABOLISM	KEGG_FRUCTOSE_AND_MANNOSE_METABOLISM	KEGG_FRUCTOSE_AND_MANNOSE_METABOLISM	31	0.36285121130987	1.64664313199189	0.0117050463796876	0.0383665409111982	0.0235013601775404	8219	tags=68%, list=39%, signal=42%	FBP1/MTMR2/PHPT1/HK1/SORD/PMM1/MPI/MTMR6/ALDOA/PFKFB1/ALDOB/ALDOC/PFKFB4/MTMR1/PFKL/TPI1/FPGT/GMPPA/PMM2/KHK/PFKM
KEGG_MISMATCH_REPAIR	KEGG_MISMATCH_REPAIR	KEGG_MISMATCH_REPAIR	23	0.407922621813867	1.70268901684236	0.0151224540703016	0.0486668067353343	0.0298107707031783	9948	tags=83%, list=47%, signal=44%	RFC5/MLH1/RPA1/RPA2/POLD4/SSBP1/RFC1/POLD2/RPA3/LIG1/RFC4/MSH6/RFC3/POLD1/MSH2/POLD3/MLH3/PMS2/MSH3
KEGG_GLYCOSYLPHOSPHATIDYLINOSITOL_GPI_ANCHOR_BIOSYNTHESIS	KEGG_GLYCOSYLPHOSPHATIDYLINOSITOL_GPI_ANCHOR_BIOSYNTHESIS	KEGG_GLYCOSYLPHOSPHATIDYLINOSITOL_GPI_ANCHOR_BIOSYNTHESIS	25	0.384976943712774	1.6455702010712	0.0160293289359772	0.0505842003749129	0.0309852669557896	9026	tags=76%, list=42%, signal=44%	PIGP/PIGY/PIGS/PIGM/PIGH/PIGG/PIGF/PIGX/PIGT/PIGC/DPM2/PIGZ/PIGV/PIGN/GPLD1/PIGK/PIGO/PIGB/GPAA1
KEGG_BETA_ALANINE_METABOLISM	KEGG_BETA_ALANINE_METABOLISM	KEGG_BETA_ALANINE_METABOLISM	22	0.400886099501581	1.64993509187696	0.0162898272393787	0.0505842003749129	0.0309852669557896	9282	tags=68%, list=44%, signal=39%	ALDH3A2/ECHS1/HADHA/AOC2/ALDH7A1/ACADM/MLYCD/ALDH2/UPB1/SMS/DPYS/EHHADH/HIBCH/ABAT/SRM
KEGG_ONE_CARBON_POOL_BY_FOLATE	KEGG_ONE_CARBON_POOL_BY_FOLATE	KEGG_ONE_CARBON_POOL_BY_FOLATE	17	0.43669361930411	1.66583155553233	0.0171196351564681	0.0522444038395665	0.0320022217988424	6437	tags=65%, list=30%, signal=45%	MTHFR/MTFMT/GART/MTHFS/MTHFD2/SHMT2/MTHFD1/MTHFD2L/ATIC/FTCD/AMT
KEGG_CARDIAC_MUSCLE_CONTRACTION	KEGG_CARDIAC_MUSCLE_CONTRACTION	KEGG_CARDIAC_MUSCLE_CONTRACTION	72	0.280972829740034	1.49957277183329	0.0176435367637587	0.0529306102912761	0.0324225564079776	7145	tags=50%, list=34%, signal=33%	COX6A1/COX7A2L/CYC1/COX7B/COX5A/UQCR10/COX7A2/UQCRFS1/COX8A/COX5B/CACNA2D4/UQCR11/CACNB2/UQCRB/COX6B1/UQCRH/COX7C/UQCRC1/CACNA1D/UQCRQ/UQCRC2/COX6C/CACNB1/CACNG5/COX4I2/CACNA2D1/CACNG6/COX4I1/TPM3/CACNG3/CACNG4/COX6A2/ATP2A2/CACNB4/ATP1B3/CACNB3
KEGG_NON_SMALL_CELL_LUNG_CANCER	KEGG_NON_SMALL_CELL_LUNG_CANCER	KEGG_NON_SMALL_CELL_LUNG_CANCER	54	0.307342628452903	1.5678820805668	0.0186794617091485	0.0551044120419881	0.0337541150182859	8777	tags=63%, list=41%, signal=37%	AKT3/MAP2K1/PIK3R3/RAF1/PIK3CA/MAPK1/PIK3CB/MAPK3/ERBB2/SOS2/ARAF/BAD/AKT1/NRAS/BRAF/FOXO3/KRAS/CDK4/TP53/PIK3R2/AKT2/FHIT/SOS1/EGF/RXRA/RB1/CDK6/GRB2/PIK3R5/E2F1/EGFR/HRAS/RXRB/MAP2K2
KEGG_INTESTINAL_IMMUNE_NETWORK_FOR_IGA_PRODUCTION	KEGG_INTESTINAL_IMMUNE_NETWORK_FOR_IGA_PRODUCTION	KEGG_INTESTINAL_IMMUNE_NETWORK_FOR_IGA_PRODUCTION	34	-0.218895	-1.39117	0.0196629991647303	0.0568526162012657	0.0348249745389852	13315	tags=91%, list=62%, signal=34%	CD80/LTBR/MADCAM1/CCL27/ICOSLG/MAP3K14/CCL28/TGFB1/TNFRSF13B/CD28/CCL25/IL15RA/TNFSF13/CCR10/ITGB7/CD86/IL15/TNFRSF13C/TNFRSF17/IL4/ITGA4/IL5/CD40LG/IL2/CXCL12/TNFSF13B/IL10/IL6/AICDA/ICOS/CXCR4
KEGG_VIBRIO_CHOLERAE_INFECTION	KEGG_VIBRIO_CHOLERAE_INFECTION	KEGG_VIBRIO_CHOLERAE_INFECTION	52	0.303691843041655	1.53419968973295	0.0199144757315168	0.0568526162012657	0.0348249745389852	6156	tags=50%, list=29%, signal=36%	ATP6V0A1/TJP1/ARF1/ATP6V1A/ATP6AP1/SEC61B/KDELR3/ATP6V1B2/ATP6V1H/TJP2/ATP6V1F/PRKACB/ATP6V1D/ATP6V1G1/SEC61G/GNAS/ATP6V0D1/SLC12A2/KDELR2/ATP6V0B/SEC61A1/ATP6V1G2/ADCY3/ATP6V0E1/PRKX/PDIA4
KEGG_LONG_TERM_POTENTIATION	KEGG_LONG_TERM_POTENTIATION	KEGG_LONG_TERM_POTENTIATION	68	0.279648121883201	1.48049232558206	0.0261044176706827	0.0733409829795372	0.0449248959077748	4775	tags=40%, list=22%, signal=31%	ATF4/EP300/CHP1/MAP2K1/RPS6KA2/CALM1/RAF1/MAPK1/PRKACB/RPS6KA3/PLCB1/MAPK3/CAMK2B/CAMK2G/ARAF/CREBBP/GNAQ/CAMK2D/NRAS/PLCB4/BRAF/KRAS/RPS6KA1/PPP3CC/PPP3CA/RAP1B/PPP1CB
KEGG_INOSITOL_PHOSPHATE_METABOLISM	KEGG_INOSITOL_PHOSPHATE_METABOLISM	KEGG_INOSITOL_PHOSPHATE_METABOLISM	54	0.298495240364995	1.52274788843512	0.0268800478843527	0.0743401324301629	0.045536923225137	8755	tags=61%, list=41%, signal=36%	ALDH6A1/IMPA1/OCRL/PIK3CA/PIK3CB/PLCB1/INPP4B/IMPA2/PIP5K1A/CDIPT/ITPK1/PIP4K2B/SYNJ2/PLCB4/INPP5A/PIK3C2A/MINPP1/PI4KA/ITPKB/PIK3C3/INPPL1/INPP5K/TPI1/PLCD4/INPP5E/PI4KB/PLCD1/IPPK/PIP4K2C/PIKFYVE/PIP5K1C/MIOX/IPMK
KEGG_PENTOSE_PHOSPHATE_PATHWAY	KEGG_PENTOSE_PHOSPHATE_PATHWAY	KEGG_PENTOSE_PHOSPHATE_PATHWAY	26	0.361381912241382	1.56319653616254	0.0296924708377519	0.0808548821274166	0.0495275222071003	9111	tags=69%, list=43%, signal=40%	FBP1/PRPS1/TALDO1/GPI/RPIA/TKT/PGD/ALDOA/ALDOB/ALDOC/PFKL/RPE/PRPS2/PGM2/PFKM/PFKP/G6PD/H6PD
KEGG_ADHERENS_JUNCTION	KEGG_ADHERENS_JUNCTION	KEGG_ADHERENS_JUNCTION	67	0.276565752916894	1.45988408492359	0.0301810865191147	0.0809401865739894	0.0495797753025329	5308	tags=45%, list=25%, signal=34%	TJP1/EP300/PTPRF/LMO7/CTNND1/ACP1/CSNK2A1/MAPK1/WASF3/CDH1/CTNNA1/PTPRJ/CSNK2B/FARP2/RAC1/YES1/MAPK3/ERBB2/CREBBP/SMAD4/ACTN4/IGF1R/PARD3/CSNK2A2/INSR/CDC42/BAIAP2/WASF2/ACTN2/WASL
KEGG_OTHER_GLYCAN_DEGRADATION	KEGG_OTHER_GLYCAN_DEGRADATION	KEGG_OTHER_GLYCAN_DEGRADATION	16	0.423452867867766	1.58750400609006	0.030751708428246	0.0812395879373066	0.0497631731046243	7128	tags=69%, list=33%, signal=46%	HEXB/NEU1/FUCA2/AGA/FUCA1/NEU3/GLB1/MAN2C1/MAN2B2/ENGASE/HEXA
KEGG_ACUTE_MYELOID_LEUKEMIA	KEGG_ACUTE_MYELOID_LEUKEMIA	KEGG_ACUTE_MYELOID_LEUKEMIA	57	0.287827250509052	1.47782346251912	0.032258064516129	0.083965844402277	0.0514331369220014	12321	tags=79%, list=58%, signal=33%	AKT3/MAP2K1/PIK3R3/MTOR/RAF1/PIK3CA/MAPK1/RELA/IKBKG/PIK3CB/MAPK3/SOS2/ARAF/BAD/AKT1/RPS6KB1/NRAS/BRAF/KRAS/ZBTB16/JUP/CEBPA/PIK3R2/AKT2/SOS1/PIM1/STAT5B/CHUK/GRB2/PIK3R5/HRAS/RARA/MAP2K2/TCF7L1/IKBKB/PML/STAT3/PIM2/NFKB1/PPARD/RUNX1T1/CCND1/STAT5A/RPS6KB2/TCF7
KEGG_PATHOGENIC_ESCHERICHIA_COLI_INFECTION	KEGG_PATHOGENIC_ESCHERICHIA_COLI_INFECTION	KEGG_PATHOGENIC_ESCHERICHIA_COLI_INFECTION	52	0.2923769009175	1.4770385209562	0.0353892821031345	0.0907812019167363	0.0556078727173585	6604	tags=48%, list=31%, signal=33%	TUBB4B/ABL1/ARPC5L/YWHAQ/CTTN/ARPC1A/CDH1/TUBB/KRT18/ROCK1/NCK2/YWHAZ/NCL/ARPC3/TUBB3/TUBA4A/OCLN/CDC42/ARPC2/TUBA3C/WASL/ARPC5/RHOA/TLR4/NCK1
KEGG_LONG_TERM_DEPRESSION	KEGG_LONG_TERM_DEPRESSION	KEGG_LONG_TERM_DEPRESSION	63	0.275287040057088	1.43750133389781	0.0403225806451613	0.101958525345622	0.0624545234052874	4578	tags=37%, list=21%, signal=29%	MAP2K1/PPP2CB/RAF1/MAPK1/PLA2G12A/PLCB1/PPP2CA/MAPK3/ARAF/GNAQ/GNAS/CRHR1/NRAS/GNAI1/PLCB4/BRAF/GNA11/PRKG2/PPP2R1A/KRAS/IGF1R/GNA12/CACNA1A
KEGG_GLYOXYLATE_AND_DICARBOXYLATE_METABOLISM	KEGG_GLYOXYLATE_AND_DICARBOXYLATE_METABOLISM	KEGG_GLYOXYLATE_AND_DICARBOXYLATE_METABOLISM	16	0.409148326153042	1.53387698169003	0.041002277904328	0.102216946324874	0.0626128187419687	8066	tags=69%, list=38%, signal=43%	MDH1/CS/MDH2/GRHPR/ACO2/MTHFD2/MTHFD1/MTHFD2L/PGP/GLYCTK/HYI
KEGG_TYPE_II_DIABETES_MELLITUS	KEGG_TYPE_II_DIABETES_MELLITUS	KEGG_TYPE_II_DIABETES_MELLITUS	46	0.293242061522268	1.45166366646642	0.0456389452332657	0.111745783603403	0.0684496920080317	4714	tags=39%, list=22%, signal=31%	PIK3R3/MTOR/PIK3CA/MAPK1/PIK3CB/PRKCD/HK1/MAPK3/MAPK9/SOCS4/CACNA1D/PRKCZ/CACNA1G/PKM/MAPK10/CACNA1A/PIK3R2/INSR
KEGG_PANTOTHENATE_AND_COA_BIOSYNTHESIS	KEGG_PANTOTHENATE_AND_COA_BIOSYNTHESIS	KEGG_PANTOTHENATE_AND_COA_BIOSYNTHESIS	16	0.404533052516389	1.51657454747986	0.0466970387243736	0.111745783603403	0.0684496920080317	8840	tags=75%, list=41%, signal=44%	PANK3/BCAT2/COASY/PPCDC/ENPP3/PANK4/ENPP1/UPB1/PANK2/BCAT1/DPYS/VNN1
KEGG_BIOSYNTHESIS_OF_UNSATURATED_FATTY_ACIDS	KEGG_BIOSYNTHESIS_OF_UNSATURATED_FATTY_ACIDS	KEGG_BIOSYNTHESIS_OF_UNSATURATED_FATTY_ACIDS	19	0.383104703533839	1.5110915682333	0.0467185761957731	0.111745783603403	0.0684496920080317	8203	tags=68%, list=38%, signal=42%	ELOVL5/HADHA/YOD1/ACAA1/FADS1/HSD17B12/ACOX3/FADS2/ELOVL6/ACOT7/ACOT1/ACOX1/ELOVL2

## Sheet: HMGCR
	ID	Description	setSize	enrichmentScore	NES	pvalue	p.adjust	qvalue	rank	leading_edge	core_enrichment
KEGG_HUNTINGTONS_DISEASE	KEGG_HUNTINGTONS_DISEASE	KEGG_HUNTINGTONS_DISEASE	156	0.420605497031672	2.29182626929319	3.71584557440024e-13	6.57704666668843e-11	4.38078636139818e-11	9610	tags=79%, list=45%, signal=44%	CREB3L4/COX6A1/NDUFV3/COX8A/NDUFS3/HDAC2/COX7A2/NDUFA2/UQCR10/NDUFC1/RCOR1/COX5A/NDUFC2/NDUFV2/NDUFA7/TFAM/NDUFAB1/SDHC/UQCR11/COX7B/POLR2L/BBC3/COX6B1/CYC1/DNALI1/EP300/IFT57/VDAC1/NDUFS1/CLTC/NDUFB4/NDUFB3/AP2A2/SDHB/DNAL1/UQCRQ/UQCRC1/NDUFB1/POLR2H/SLC25A5/UQCRH/NDUFB2/NDUFA1/BAX/SLC25A4/POLR2D/CREB3/NDUFS2/POLR2J/POLR2C/SOD1/AP2S1/CREBBP/CYCS/HDAC1/TBPL1/DNAL4/NDUFB6/DNAH3/PLCB1/CLTA/UQCRFS1/…
KEGG_OXIDATIVE_PHOSPHORYLATION	KEGG_OXIDATIVE_PHOSPHORYLATION	KEGG_OXIDATIVE_PHOSPHORYLATION	99	0.474423891084753	2.45141198789689	2.21440660206327e-12	1.95974984282599e-10	1.30533441805835e-10	8382	tags=80%, list=39%, signal=49%	ATP6AP1/ATP6V1G1/COX6A1/NDUFV3/ATP6V0B/COX8A/NDUFS3/ATP6V1H/COX7A2/NDUFA2/UQCR10/NDUFC1/COX5A/NDUFC2/NDUFV2/PPA2/NDUFA7/NDUFAB1/SDHC/UQCR11/COX7B/COX6B1/CYC1/ATP6V0A1/COX17/NDUFS1/NDUFB4/NDUFB3/SDHB/UQCRQ/UQCRC1/NDUFB1/UQCRH/ATP6V1E2/NDUFB2/NDUFA1/NDUFS2/ATP6V0D1/ATP6V1A/ATP6V1D/NDUFB6/ATP6V0E1/UQCRFS1/COX7A2L/ATP6V1B2/NDUFA10/COX5B/NDUFS7/COX7C/COX10/NDUFA11/SDHA/UQCRB/NDUFS6/NDUFB5/COX4I2/NDUFA…
KEGG_PARKINSONS_DISEASE	KEGG_PARKINSONS_DISEASE	KEGG_PARKINSONS_DISEASE	96	0.466175729193049	2.39708583251721	4.72913438839525e-11	2.7901892891532e-09	1.85846684736936e-09	6730	tags=70%, list=32%, signal=48%	COX6A1/NDUFV3/UBE2J1/COX8A/NDUFS3/COX7A2/NDUFA2/UQCR10/NDUFC1/COX5A/UBA1/NDUFC2/NDUFV2/PARK7/NDUFA7/NDUFAB1/SDHC/UQCR11/COX7B/COX6B1/CYC1/VDAC1/UBE2L3/NDUFS1/NDUFB4/NDUFB3/SDHB/UQCRQ/UQCRC1/NDUFB1/SLC25A5/UQCRH/NDUFB2/NDUFA1/SLC25A4/NDUFS2/CYCS/PINK1/NDUFB6/UQCRFS1/COX7A2L/APAF1/NDUFA10/COX5B/NDUFS7/COX7C/SDHA/UBE2G1/UQCRB/NDUFS6/NDUFB5/COX4I2/UBE2J2/NDUFA8/SLC25A6/NDUFA4/SNCA/NDUFS4/NDUFB10/SDHD…
KEGG_ALZHEIMERS_DISEASE	KEGG_ALZHEIMERS_DISEASE	KEGG_ALZHEIMERS_DISEASE	141	0.402806501301486	2.17285337436888	1.67526061057024e-10	7.41302820177331e-09	4.93761022062808e-09	7933	tags=69%, list=37%, signal=43%	ADAM10/CHP1/COX6A1/NDUFV3/COX8A/NDUFS3/ATP2A3/COX7A2/NDUFA2/UQCR10/NDUFC1/COX5A/EIF2AK3/NDUFC2/NDUFV2/CDK5/NDUFA7/NDUFAB1/SDHC/UQCR11/COX7B/COX6B1/CYC1/IDE/NDUFS1/NDUFB4/NDUFB3/SDHB/UQCRQ/UQCRC1/NDUFB1/UQCRH/NDUFB2/NDUFA1/FADD/PSEN2/NDUFS2/GSK3B/CYCS/NDUFB6/PLCB1/PPP3CA/UQCRFS1/COX7A2L/APAF1/NDUFA10/COX5B/NDUFS7/BAD/COX7C/GRIN2D/CACNA1S/SDHA/PSEN1/UQCRB/NDUFS6/NDUFB5/COX4I2/PPP3CC/NDUFA8/MAPK3/HS…
KEGG_UBIQUITIN_MEDIATED_PROTEOLYSIS	KEGG_UBIQUITIN_MEDIATED_PROTEOLYSIS	KEGG_UBIQUITIN_MEDIATED_PROTEOLYSIS	127	0.403778655775252	2.14612349298824	9.30642575602965e-10	3.2944747176345e-08	2.19435723089541e-08	7455	tags=67%, list=35%, signal=44%	RCHY1/UBE4A/PRPF19/UBE2J1/WWP1/NEDD4L/ANAPC11/BIRC6/UBA1/TRIP12/UBE2Q2/UBE2N/UBE2D4/CUL3/UBE2E1/UBE2Z/KLHL9/RNF7/CUL5/UBE3C/RBX1/UBE2L3/UBE2H/UBE2S/BIRC2/DDB1/KEAP1/MGRN1/BTRC/PPIL2/TRIM37/ANAPC10/UBE2B/CUL4A/STUB1/UBE2I/UBE4B/CDC16/UBE2K/ANAPC2/UBE2M/XIAP/ANAPC13/UBR5/ANAPC7/CDC26/SMURF2/CUL2/WWP2/UBE3B/CUL7/UBE2R2/ERCC8/TRIM32/PIAS4/FZR1/UBE2G1/FBXO4/UBE2D3/PIAS2/UBE2J2/HERC3/ITCH/UBE2W/HERC2/F…
KEGG_SPLICEOSOME	KEGG_SPLICEOSOME	KEGG_SPLICEOSOME	118	0.406933188054358	2.14225034480757	2.60586205505479e-09	7.68729306241162e-08	5.12029035379186e-08	8460	tags=75%, list=40%, signal=46%	PRPF19/BCAS2/SF3B5/THOC1/SRSF8/SF3A1/PCBP1/SNRPB/SNRPD3/CRNKL1/CDC40/HSPA8/SNRPG/EIF4A3/SRSF5/HNRNPU/HNRNPC/SF3B4/SNRPE/TXNL4A/NCBP1/LSM4/SF3B6/SRSF6/WBP11/SNRNP27/LSM6/PRPF4/DHX15/THOC2/SNRPA1/LSM5/SNRPC/CWC15/HSPA1A/PRPF40A/DDX46/DHX16/CHERP/HNRNPK/AQR/SRSF3/SRSF1/ACIN1/SF3B1/SNRPD1/NCBP2/SNRPF/TRA2B/SNRNP70/PUF60/PRPF6/U2SURP/PRPF8/RBM8A/PRPF18/SF3B3/LSM8/LSM3/SNRPA/PHF5A/BUD31/PPIE/CTNNBL1/PP…
KEGG_VALINE_LEUCINE_AND_ISOLEUCINE_DEGRADATION	KEGG_VALINE_LEUCINE_AND_ISOLEUCINE_DEGRADATION	KEGG_VALINE_LEUCINE_AND_ISOLEUCINE_DEGRADATION	43	0.552864990188578	2.50233573190195	1.61264727934294e-08	4.07769383491e-07	2.7160375231039e-07	6574	tags=79%, list=31%, signal=55%	AUH/BCAT2/ALDH6A1/PCCA/ALDH7A1/ACAT2/ACAD8/IVD/HMGCL/ACAA1/MCEE/ECHS1/PCCB/MCCC2/HMGCS1/ACADM/ALDH3A2/MCCC1/HIBADH/HADHA/ACADSB/BCKDHA/ACAT1/HIBCH/DLD/ABAT/HADHB/HSD17B10/HMGCS2/OXCT1/AOX1/HADH/EHHADH/BCKDHB
KEGG_PEROXISOME	KEGG_PEROXISOME	KEGG_PEROXISOME	78	0.428363804229712	2.13824024903555	2.13931551262452e-07	4.73323557168175e-06	3.15267549228877e-06	7996	tags=72%, list=38%, signal=45%	NUDT19/PEX7/ACSL3/ACSL1/PEX13/PXMP2/HMGCL/EPHX2/ACAA1/PXMP4/SLC27A2/ECH1/CRAT/PEX10/IDH1/SLC25A17/SCP2/PEX26/PRDX1/PAOX/PEX11A/ECI2/PEX3/MPV17L/DAO/SOD1/DHRS4/GNPAT/MVK/PIPOX/XDH/HACL1/PEX1/IDH2/ABCD4/ACOT8/PEX2/CAT/HSD17B4/PEX11B/NUDT12/PEX11G/PRDX5/ABCD3/PEX12/MLYCD/PEX19/EHHADH/MPV17/ACOX1/ACOX3/PHYH/AMACR/PMVK/PEX14/FAR1
KEGG_RIBOSOME	KEGG_RIBOSOME	KEGG_RIBOSOME	83	0.409347954537099	2.06163858740774	5.0660301414785e-07	9.96319261157439e-06	6.63620322626424e-06	10797	tags=88%, list=51%, signal=44%	MRPL13/RPL17/RPLP0/RPL7A/RPS3/RPL8/RPL23/RPS27L/RPL18/RPS9/RPL3/RPS2/RPS19/RPS8/RPS6/RPS4Y1/RPS23/RPL38/RPL35/RPL41/RPL6/RPS29/RPL12/RPL10A/RPS7/RPS21/RPL22L1/RPL39/RPS15/RPSA/RPS12/RPL11/RPS27A/RPL13A/RPS18/RPL19/RPS28/RPL36A/RPL26L1/RPS25/UBA52/RPL27A/RPL35A/RPL23A/RPL13/RPS5/RPL36/RPL15/RPS17/RPL31/RPS24/RPL30/RPL9/RPL32/RPL37A/RPL7/RPL5/RPL22/RPL29/RPL10/RPLP1/RPS3A/FAU/RPL37/RSL24D1/RPS16/RP…
KEGG_RNA_DEGRADATION	KEGG_RNA_DEGRADATION	KEGG_RNA_DEGRADATION	54	0.469011794493133	2.21491469579335	1.15858072354776e-06	2.05068788067953e-05	1.36590569512999e-05	9334	tags=87%, list=44%, signal=49%	EXOSC3/MPHOSPH6/CNOT6L/PAPOLG/C1D/WDR61/LSM4/CNOT6/HSPA9/LSM6/CNOT3/CNOT1/CNOT8/PAPOLA/LSM5/HSPD1/CNOT7/PATL1/DCPS/EXOSC7/EDC4/LSM1/EXOSC5/ZCCHC7/SKIV2L/LSM8/CNOT10/PNPT1/LSM3/XRN2/PARN/TTC37/EDC3/EXOSC4/EXOSC8/DCP1A/DCP2/XRN1/EXOSC1/ENO3/EXOSC9/EXOSC2/DIS3/EXOSC6/CNOT4/CNOT2/DDX6
KEGG_PROTEASOME	KEGG_PROTEASOME	KEGG_PROTEASOME	40	0.508134169557849	2.26768383958221	1.97085822585456e-06	3.17129005432962e-05	2.1123073808202e-05	5359	tags=68%, list=25%, signal=51%	PSMF1/PSMD3/PSMA4/PSMD8/PSMD7/PSMA2/PSMB6/PSMD11/PSMB3/PSMD13/PSMB2/PSMA7/PSMB7/PSMD14/PSMB1/PSMB5/PSMD12/POMP/PSMC5/PSMA1/PSMD1/PSMA5/PSME4/PSMD6/PSME3/PSMC2/PSMA3
KEGG_CITRATE_CYCLE_TCA_CYCLE	KEGG_CITRATE_CYCLE_TCA_CYCLE	KEGG_CITRATE_CYCLE_TCA_CYCLE	30	0.559428594538728	2.35628329752479	2.3750191955874e-06	3.50315331349142e-05	2.33335219215604e-05	7409	tags=83%, list=35%, signal=54%	ACLY/SDHC/CS/IDH1/MDH2/OGDH/SDHB/MDH1/SUCLG2/PCK2/ACO2/IDH3G/SUCLA2/PC/DLD/IDH2/DLAT/SDHA/DLST/PDHB/SDHD/SUCLG1/IDH3A/FH/IDH3B
KEGG_PROTEIN_EXPORT	KEGG_PROTEIN_EXPORT	KEGG_PROTEIN_EXPORT	22	0.603981281809194	2.36804324624575	8.280279096757e-06	0.000112739184625076	7.50924096224117e-05	4387	tags=77%, list=21%, signal=61%	SEC11C/SPCS2/SRP54/SEC61G/HSPA5/SRP19/SEC63/SPCS1/SEC61B/SRPRB/SRP9/SEC61A1/SPCS3/SRP14/OXA1L/SRP68/IMMP1L
KEGG_STEROID_BIOSYNTHESIS	KEGG_STEROID_BIOSYNTHESIS	KEGG_STEROID_BIOSYNTHESIS	17	0.615822073628368	2.26858138920071	3.76385549547042e-05	0.000475858873355904	0.000316956252250141	1536	tags=59%, list=7%, signal=55%	SC5D/DHCR24/FDFT1/SQLE/MSMO1/LSS/CYP51A1/HSD17B7/DHCR7/SOAT1
KEGG_ENDOCYTOSIS	KEGG_ENDOCYTOSIS	KEGG_ENDOCYTOSIS	171	0.298362825670572	1.64231779270594	0.00011676544730752	0.00137783227822874	0.000917735445504721	6512	tags=49%, list=31%, signal=34%	PRKCI/PRKCZ/ADRB2/IGF1R/FGFR3/CHMP5/VPS25/RNF41/ARF6/VPS37C/DNM2/WWP1/NEDD4L/SH3GLB2/RAB11FIP1/RAB11A/RAB4A/PDCD6IP/CHMP2B/TSG101/ERBB3/RAB5A/CHMP2A/AGAP1/LDLRAP1/STAMBP/STAM/HSPA8/CDC42/CHMP4C/EPN3/EGF/CHMP3/ARFGAP3/CLTC/AP2A2/VTA1/VPS4B/PIKFYVE/SNF8/PIP5K1A/CHMP1B/PSD4/STAM2/AP2S1/ASAP3/USP8/SMURF2/HSPA1A/RAB5B/EPN2/RAB5C/GRK6/CLTA/AP2M1/RAB11FIP3/SMAP1/ARFGAP2/ACAP3/CLTB/ACAP1/DNM1L/PIP5K1C/VP…
KEGG_NEUROTROPHIN_SIGNALING_PATHWAY	KEGG_NEUROTROPHIN_SIGNALING_PATHWAY	KEGG_NEUROTROPHIN_SIGNALING_PATHWAY	122	0.322661475624647	1.70484826544295	0.000157575555495143	0.00174317958266502	0.00116108304049053	9483	tags=66%, list=44%, signal=37%	ZNF274/YWHAE/AKT1/MAP2K1/MAGED1/PRKCD/PIK3CB/MAPK8/IRAK1/CDC42/CRK/ATF4/RELA/PIK3CA/RPS6KA1/RPS6KA4/ABL1/BAX/FOXO3/AKT3/YWHAQ/CAMK2D/YWHAG/MAPK9/GSK3B/RPS6KA3/KRAS/PIK3R2/BAD/CAMK2B/TP53/RPS6KA2/PIK3R3/PIK3R5/ARHGDIA/RIPK2/YWHAZ/GAB1/PSEN1/IRS1/KIDINS220/RAC1/SOS2/CAMK2G/MAPK3/RAF1/MAP2K2/AKT2/CALML3/NRAS/MAP2K5/BRAF/IKBKB/MAP3K5/MAPK13/SH2B1/MAP2K7/YWHAB/CSK/PTPN11/GRB2/TRAF6/MAPK1/SHC2/CALM1/MA…
KEGG_TERPENOID_BACKBONE_BIOSYNTHESIS	KEGG_TERPENOID_BACKBONE_BIOSYNTHESIS	KEGG_TERPENOID_BACKBONE_BIOSYNTHESIS	14	0.630704195072618	2.20658709798475	0.000203223232249268	0.00210157488601086	0.00139980010248716	5680	tags=86%, list=27%, signal=63%	IDI1/ACAT2/FDPS/HMGCS1/PDSS2/IDI2/GGPS1/ACAT1/MVK/PDSS1/DHDDS/HMGCS2
KEGG_RENAL_CELL_CARCINOMA	KEGG_RENAL_CELL_CARCINOMA	KEGG_RENAL_CELL_CARCINOMA	66	0.375014218129612	1.83060673763505	0.000214256561493138	0.00210157488601086	0.00139980010248716	8379	tags=68%, list=39%, signal=42%	AKT1/VEGFC/MAP2K1/FLCN/PAK4/PIK3CB/ARAF/CDC42/EP300/RBX1/CRK/PAK2/PIK3CA/ARNT2/AKT3/CREBBP/CUL2/KRAS/PIK3R2/SLC2A1/PIK3R3/PIK3R5/GAB1/PAK6/VEGFB/RAC1/SOS2/MAPK3/RAF1/MAP2K2/AKT2/ARNT/NRAS/HGF/BRAF/EGLN2/FH/PTPN11/GRB2/MAPK1/TGFB2/CRKL/RAP1B/TGFA/SOS1
KEGG_OOCYTE_MEIOSIS	KEGG_OOCYTE_MEIOSIS	KEGG_OOCYTE_MEIOSIS	108	0.327387141957993	1.70767739522274	0.000225592784374047	0.00210157488601086	0.00139980010248716	9103	tags=64%, list=43%, signal=37%	CHP1/IGF1R/YWHAE/PPP1CA/MAP2K1/ANAPC11/PPP2CA/PPP2R5D/RBX1/CCNB2/RPS6KA1/BTRC/ANAPC10/ADCY6/YWHAQ/CDC16/CAMK2D/ANAPC2/YWHAG/ANAPC13/PPP2CB/ANAPC7/CDC26/RPS6KA3/PPP3CA/PPP2R1A/CPEB1/PTTG1/CAMK2B/PKMYT1/RPS6KA2/YWHAZ/SPDYA/REC8/PPP3CC/CAMK2G/SMC1A/MAPK3/PPP3R2/ESPL1/PPP2R1B/CALML3/CCNE2/ADCY2/PRKACB/FBXW11/PPP3R1/ANAPC5/ANAPC1/CCNE1/CDC23/CCNB1/YWHAB/ITPR2/CDK2/AURKA/PPP1CC/MAPK1/CALM1/PPP2R5C/PPP1…
KEGG_PURINE_METABOLISM	KEGG_PURINE_METABOLISM	KEGG_PURINE_METABOLISM	147	0.302717721833312	1.63797304494989	0.000284809368655593	0.002520562912602	0.00167887627839087	9381	tags=64%, list=44%, signal=36%	CANT1/ENTPD4/ADPRM/PDE8B/POLR1D/NME3/NME4/IMPDH1/APRT/PDE9A/POLD4/POLR2L/AK4/NT5C2/POLR1C/NUDT9/POLR3H/POLR3B/POLR2H/ENTPD6/DGUOK/POLD2/ADCY6/PDE3B/POLR2D/POLR3A/PAICS/FHIT/POLR2J/POLR2C/PRPS1/POLE3/NT5C1A/POLR3K/XDH/PRIM2/ITPA/POLR2B/POLR2E/AK2/IMPDH2/NUDT2/NUDT5/GMPS/PDE6G/POLA2/PDE7A/PDE1B/PKM/PNPT1/PFAS/GMPR2/PNP/PDE5A/ADK/AMPD3/POLR2K/POLR2G/POLR2F/ADCY2/GART/POLR3D/ENPP1/PDE11A/PDE6D/ENPP3/…
KEGG_ENDOMETRIAL_CANCER	KEGG_ENDOMETRIAL_CANCER	KEGG_ENDOMETRIAL_CANCER	52	0.392123397037116	1.83788446190906	0.000491476307703397	0.00414244316492863	0.0027591652362296	6294	tags=58%, list=30%, signal=41%	CDH1/AKT1/MAP2K1/PIK3CB/ARAF/EGF/ERBB2/ELK1/PIK3CA/FOXO3/AKT3/GSK3B/MLH1/AXIN1/KRAS/PIK3R2/BAD/TP53/PIK3R3/PIK3R5/AXIN2/SOS2/CTNNA1/MAPK3/RAF1/MAP2K2/AKT2/NRAS/APC/BRAF
KEGG_PROPANOATE_METABOLISM	KEGG_PROPANOATE_METABOLISM	KEGG_PROPANOATE_METABOLISM	31	0.468282599257623	1.98428383359194	0.000524566011451188	0.00422037200122092	0.00281107144892503	4019	tags=55%, list=19%, signal=45%	ALDH6A1/ACSS1/PCCA/ALDH7A1/ACAT2/MCEE/ECHS1/PCCB/ACADM/ALDH3A2/ACACA/HADHA/SUCLG2/SUCLA2/ACAT1/HIBCH/ABAT
KEGG_ERBB_SIGNALING_PATHWAY	KEGG_ERBB_SIGNALING_PATHWAY	KEGG_ERBB_SIGNALING_PATHWAY	86	0.330993387947649	1.67775041648009	0.000599907739098823	0.00461668129654311	0.00307504195785209	8917	tags=62%, list=42%, signal=36%	AKT1/MAP2K1/PAK4/PIK3CB/ERBB3/MAPK8/BTC/ARAF/MTOR/NRG4/EGF/CRK/ERBB2/ELK1/NRG1/CDKN1B/PAK2/PIK3CA/ABL1/MAP2K4/AKT3/CAMK2D/MAPK9/GSK3B/KRAS/PIK3R2/BAD/CAMK2B/PIK3R3/PIK3R5/GAB1/PAK6/SOS2/CAMK2G/MAPK3/RAF1/MAP2K2/NCK2/AKT2/NRAS/BRAF/MAP2K7/GRB2/MAPK1/PTK2/SHC2/CRKL/RPS6KB1/TGFA/SOS1/RPS6KB2/MAPK10/SRC
KEGG_RNA_POLYMERASE	KEGG_RNA_POLYMERASE	KEGG_RNA_POLYMERASE	27	0.465558039747022	1.91676483816752	0.000720277357823523	0.00531204551394848	0.00353820456474713	9170	tags=85%, list=43%, signal=49%	POLR1D/POLR2L/POLR1C/POLR3H/POLR3B/POLR2H/POLR2D/POLR3A/POLR2J/POLR2C/POLR3K/POLR2B/POLR2E/POLR2K/POLR2G/POLR2F/POLR3D/POLR2A/POLR2I/POLR3G/POLR1A/POLR3F/POLR3GL
KEGG_PYRIMIDINE_METABOLISM	KEGG_PYRIMIDINE_METABOLISM	KEGG_PYRIMIDINE_METABOLISM	92	0.331676997816061	1.69267152809264	0.000920463984393221	0.006516885009504	0.00434071436850698	9825	tags=71%, list=46%, signal=38%	CANT1/ENTPD4/POLR1D/NME3/NME4/CTPS2/UPRT/POLD4/POLR2L/NT5C2/POLR1C/POLR3H/POLR3B/DPYS/POLR2H/ENTPD6/UMPS/POLD2/POLR2D/POLR3A/POLR2J/POLR2C/DCTD/POLE3/CMPK1/NT5C1A/POLR3K/PRIM2/ITPA/POLR2B/POLR2E/UCKL1/NUDT2/POLA2/AK3/PNPT1/PNP/POLR2K/POLR2G/POLR2F/POLR3D/UPB1/UCK1/NT5C/POLR2A/POLE4/DHODH/TXNRD2/NT5C1B/DTYMK/RRM2B/NME6/POLR2I/NT5C3A/POLR3G/POLR1A/POLE/ENTPD3/POLR3F/POLR3GL/ENTPD5/CAD/TK2/NME5/NME1
KEGG_CHRONIC_MYELOID_LEUKEMIA	KEGG_CHRONIC_MYELOID_LEUKEMIA	KEGG_CHRONIC_MYELOID_LEUKEMIA	73	0.335218126875777	1.65715640569134	0.00118733244766263	0.00801641546208853	0.00533950955547972	7759	tags=58%, list=36%, signal=37%	AKT1/HDAC2/MAP2K1/PIK3CB/ARAF/IKBKG/CRK/CDKN1B/RELA/PIK3CA/CTBP2/ABL1/AKT3/BCL2L1/HDAC1/KRAS/PIK3R2/BAD/TP53/PIK3R3/BCR/PIK3R5/CHUK/CTBP1/SOS2/MAPK3/RAF1/MAP2K2/AKT2/NRAS/RB1/BRAF/CDK4/MDM2/IKBKB/PTPN11/GRB2/MAPK1/SMAD4/SHC2/TGFB2/CRKL
KEGG_PYRUVATE_METABOLISM	KEGG_PYRUVATE_METABOLISM	KEGG_PYRUVATE_METABOLISM	40	0.41286467822205	1.84251840326566	0.00122284303658978	0.00801641546208853	0.00533950955547972	4896	tags=50%, list=23%, signal=39%	ACSS1/GLO1/ALDH7A1/ACAT2/GRHPR/ALDH3A2/MDH2/ACACA/MDH1/PCK2/PC/ACYP2/HAGHL/HAGH/ACAT1/DLD/DLAT/ME2/PDHB/PKM
KEGG_NUCLEOTIDE_EXCISION_REPAIR	KEGG_NUCLEOTIDE_EXCISION_REPAIR	KEGG_NUCLEOTIDE_EXCISION_REPAIR	44	0.391319924493591	1.7802454997465	0.00136803700114261	0.00862952690511404	0.00574788589576433	10428	tags=84%, list=49%, signal=43%	GTF2H5/CCNH/POLD4/ERCC6/MNAT1/RFC5/RPA1/ERCC5/RBX1/CDK7/DDB1/GTF2H3/POLD2/CUL4A/RAD23B/LIG1/ERCC2/POLE3/ERCC3/ERCC8/RPA4/RPA2/GTF2H1/RPA3/RFC1/CUL4B/XPA/POLE4/ERCC1/PCNA/POLE/RFC3/GTF2H2/RFC4/RAD23A/POLD1/POLE2
KEGG_MTOR_SIGNALING_PATHWAY	KEGG_MTOR_SIGNALING_PATHWAY	KEGG_MTOR_SIGNALING_PATHWAY	50	0.380108717466669	1.77015734019183	0.00141387728953846	0.00862952690511404	0.00574788589576433	7485	tags=64%, list=35%, signal=42%	AKT1/VEGFC/PIK3CB/CAB39L/MTOR/EIF4E/CAB39/PIK3CA/RPS6KA1/AKT3/PRKAA2/STK11/ULK3/RICTOR/RPS6KA3/PIK3R2/PRKAA1/RPS6KA2/PIK3R3/PIK3R5/VEGFB/TSC1/MLST8/MAPK3/ULK1/AKT2/RPS6/BRAF/ULK2/RHEB/EIF4B/MAPK1
KEGG_INSULIN_SIGNALING_PATHWAY	KEGG_INSULIN_SIGNALING_PATHWAY	KEGG_INSULIN_SIGNALING_PATHWAY	134	0.290139864340729	1.55391413382789	0.00148185921466055	0.00874296936649726	0.00582344673831516	11728	tags=74%, list=55%, signal=33%	PRKCI/PRKCZ/PPP1R3D/PTPRF/PPP1CA/INSR/AKT1/MAP2K1/PRKAR2A/PHKA2/PRKAG1/PIK3CB/INPP5K/GYS1/FBP1/MAPK8/FASN/ARAF/MTOR/EIF4E/ACACA/CRK/EXOC7/ELK1/PIK3CA/PCK2/PDE3B/AKT3/PRKAA2/HK1/MAPK9/GSK3B/MKNK2/MKNK1/KRAS/PIK3R2/PRKAA1/BAD/PIK3R3/PIK3R5/FLOT2/IRS1/SREBF1/PRKAG2/SOS2/PYGL/TSC1/MAPK3/RAF1/MAP2K2/PHKB/AKT2/CALML3/NRAS/PHKA1/RPS6/PRKACB/PTPN1/BRAF/SOCS4/IKBKB/RHEB/GRB2/PPP1CC/MAPK1/SHC2/CALM1/PYGB/C…
KEGG_N_GLYCAN_BIOSYNTHESIS	KEGG_N_GLYCAN_BIOSYNTHESIS	KEGG_N_GLYCAN_BIOSYNTHESIS	45	0.381104775565606	1.74007800926616	0.00155416178523202	0.00886196651458576	0.0059027074019245	9411	tags=76%, list=44%, signal=42%	ALG3/ALG2/TUSC3/DPM3/B4GALT3/DPAGT1/ALG8/DOLPP1/B4GALT2/RPN1/ALG1/DPM2/ALG5/ALG11/MGAT2/MGAT4B/DDOST/RFT1/RPN2/B4GALT1/MGAT4A/MOGS/GANAB/ALG6/DAD1/STT3B/ALG13/ALG12/MAN2A2/MGAT1/ALG9/MAN2A1/ALG14/MAN1A2
KEGG_PROGESTERONE_MEDIATED_OOCYTE_MATURATION	KEGG_PROGESTERONE_MEDIATED_OOCYTE_MATURATION	KEGG_PROGESTERONE_MEDIATED_OOCYTE_MATURATION	84	0.318396726330664	1.60605393207596	0.00164753089240322	0.00886196651458576	0.0059027074019245	7485	tags=56%, list=35%, signal=36%	IGF1R/AKT1/MAP2K1/ANAPC11/PIK3CB/MAPK8/ARAF/CCNB2/PIK3CA/RPS6KA1/ANAPC10/ADCY6/PDE3B/AKT3/CCNA2/CDC16/ANAPC2/MAPK9/ANAPC13/GNAI3/ANAPC7/CDC26/RPS6KA3/KRAS/PIK3R2/HSP90AB1/CPEB1/PKMYT1/RPS6KA2/PIK3R3/PIK3R5/FZR1/SPDYA/MAPK3/RAF1/AKT2/ADCY2/PRKACB/BRAF/ANAPC5/ANAPC1/GNAI1/CDC23/MAPK13/CCNB1/CDK2/MAPK1
KEGG_FATTY_ACID_METABOLISM	KEGG_FATTY_ACID_METABOLISM	KEGG_FATTY_ACID_METABOLISM	40	0.407228343812423	1.81736476231624	0.00165223104509226	0.00886196651458576	0.0059027074019245	3376	tags=45%, list=16%, signal=38%	ACSL3/ACSL1/ALDH7A1/ACAT2/ACADL/ECI1/ACAA1/ECHS1/ACADM/ALDH3A2/GCDH/HADHA/ACADSB/ADH5/CPT2/ECI2/CPT1A/ACAT1
KEGG_LYSOSOME	KEGG_LYSOSOME	KEGG_LYSOSOME	120	0.288985367123711	1.52354464769215	0.00212740862357548	0.0110750390109665	0.00737677293623695	12843	tags=81%, list=60%, signal=32%	NEU1/ATP6AP1/AP1M2/AP1G1/ENTPD4/NAGLU/FUCA1/ATP6V0B/AP1B1/PPT1/ATP6V1H/AP3S2/AP3D1/CLN5/ACP2/SGSH/AGA/ATP6V0A1/SLC17A5/IGF2R/GAA/AP3M1/M6PR/CLTC/GNPTG/CTSG/ASAH1/SCARB2/NAGPA/SUMF1/GALC/ATP6V0D1/HEXB/AP3B1/CTNS/CD164/GGA1/ABCA2/CLTA/NPC1/DNASE2/ARSG/GGA3/PLA2G15/CLTB/IDUA/CLN3/ATP6V0C/MFSD8/CTSO/GBA/HGSNAT/MCOLN1/TPP1/SMPD1/CTSV/GLB1/NAGA/GGA2/HEXA/AP4B1/GNS/GM2A/ATP6V0A2/PSAPL1/ARSB/NAPSA/AP1S1/…
KEGG_PROSTATE_CANCER	KEGG_PROSTATE_CANCER	KEGG_PROSTATE_CANCER	88	0.309839148926423	1.57491042140169	0.00253438170945597	0.0126888817716819	0.0084517083462883	9481	tags=62%, list=44%, signal=35%	PDGFA/IGF1R/CREB3L4/AKT1/MAP2K1/PIK3CB/ARAF/IKBKG/MTOR/EP300/EGF/ERBB2/KLK3/ATF4/CDKN1B/RELA/PIK3CA/AKT3/CREB3/CREBBP/GSK3B/KRAS/PIK3R2/HSP90AB1/BAD/TP53/PIK3R3/PIK3R5/CHUK/CREB3L2/SOS2/MAPK3/RAF1/MAP2K2/AKT2/NRAS/CCNE2/HSP90B1/RB1/BRAF/MDM2/CCNE1/IKBKB/GRB2/CDK2/MAPK1/CASP9/HSP90AA1/TGFA/SOS1/CTNNB1/PDGFB/HRAS/CREB1/NFKB1
KEGG_LYSINE_DEGRADATION	KEGG_LYSINE_DEGRADATION	KEGG_LYSINE_DEGRADATION	39	0.400307616821262	1.7752860012574	0.00258078951288446	0.0126888817716819	0.0084517083462883	6481	tags=59%, list=30%, signal=41%	AADAT/ALDH7A1/ACAT2/DOT1L/ECHS1/SETD7/ALDH3A2/GCDH/AASDHPPT/OGDH/HADHA/ASH1L/ACAT1/PIPOX/AASDH/PLOD1/EHMT1/DLST/SUV39H2/SETD1B/SETDB2/HADH/EHHADH
KEGG_GLUTATHIONE_METABOLISM	KEGG_GLUTATHIONE_METABOLISM	KEGG_GLUTATHIONE_METABOLISM	47	0.370971063546777	1.70884729160483	0.00288465121432416	0.0137995477009561	0.0091914917782164	8757	tags=68%, list=41%, signal=40%	GSTZ1/GCLM/MGST2/GCLC/SMS/GGCT/GGT1/PGD/IDH1/GSR/GSTO2/TXNDC12/ANPEP/GPX4/MGST3/IDH2/GPX1/GSTA4/MGST1/GSTT1/SRM/GSTA1/GGT7/GSS/OPLAH/GPX7/GSTO1/GSTT2/RRM2B/ODC1/GPX5/G6PD
KEGG_BETA_ALANINE_METABOLISM	KEGG_BETA_ALANINE_METABOLISM	KEGG_BETA_ALANINE_METABOLISM	22	0.474418292248301	1.86006266533429	0.00321960112153756	0.0149965631187407	0.00998879018316361	6926	tags=64%, list=32%, signal=43%	ALDH7A1/SMS/ECHS1/ACADM/ALDH3A2/DPYS/HADHA/AOC2/HIBCH/ABAT/SRM/MLYCD/EHHADH/UPB1
KEGG_PANCREATIC_CANCER	KEGG_PANCREATIC_CANCER	KEGG_PANCREATIC_CANCER	69	0.322497778127374	1.5829563987972	0.00382966666529808	0.0173807948655836	0.0115768600948282	7606	tags=58%, list=36%, signal=37%	AKT1/VEGFC/MAP2K1/PIK3CB/MAPK8/ARAF/IKBKG/CDC42/RAC3/EGF/RALB/ERBB2/RELA/PIK3CA/AKT3/BCL2L1/MAPK9/KRAS/RAD51/PIK3R2/BAD/TP53/PIK3R3/PIK3R5/CHUK/VEGFB/RAC1/MAPK3/RAF1/STAT3/AKT2/RALBP1/RB1/BRAF/RALGDS/CDK4/IKBKB/MAPK1/SMAD4/TGFB2
KEGG_VIBRIO_CHOLERAE_INFECTION	KEGG_VIBRIO_CHOLERAE_INFECTION	KEGG_VIBRIO_CHOLERAE_INFECTION	52	0.348218350479787	1.63210127356371	0.00466160111584199	0.0206275849376008	0.0137394559203764	6719	tags=56%, list=32%, signal=38%	ATP6AP1/ATP6V1G1/KDELR3/ATP6V0B/SEC61G/ATP6V1H/ARF1/SEC61B/SLC12A2/SEC61A1/ATP6V0A1/PDIA4/TJP2/GNAS/KDELR2/ATP6V1E2/ATP6V0D1/ATP6V1A/ATP6V1D/ATP6V0E1/ATP6V1B2/TJP1/ATP6V1F/ATP6V0C/ATP6V1B1/PRKACB/KDELR1/ATP6V0E2/SEC61A2
KEGG_BASAL_TRANSCRIPTION_FACTORS	KEGG_BASAL_TRANSCRIPTION_FACTORS	KEGG_BASAL_TRANSCRIPTION_FACTORS	33	0.398545704125804	1.71635858409555	0.00554637985235789	0.0239441276553011	0.0159485120273192	9031	tags=76%, list=42%, signal=44%	STON1/GTF2I/GTF2A2/TAF13/GTF2A1/GTF2E2/TAF5L/TAF7/GTF2H3/TAF11/GTF2E1/TAF10/TBPL1/GTF2B/GTF2IRD1/TAF6/TAF2/GTF2H1/GTF2F1/TAF1/TAF6L/TAF4B/GTF2H2/TAF4/TAF9B
KEGG_BUTANOATE_METABOLISM	KEGG_BUTANOATE_METABOLISM	KEGG_BUTANOATE_METABOLISM	33	0.394251399849377	1.69786493096803	0.00654088856845025	0.0275651732527546	0.0183603889640709	6481	tags=58%, list=30%, signal=40%	BDH1/ALDH7A1/ACAT2/HMGCL/ECHS1/AACS/HMGCS1/ALDH3A2/L2HGDH/HADHA/ALDH5A1/ACAT1/ABAT/PDHB/HMGCS2/OXCT1/HADH/ACSM3/EHHADH
KEGG_COLORECTAL_CANCER	KEGG_COLORECTAL_CANCER	KEGG_COLORECTAL_CANCER	62	0.331313800223647	1.61319815094944	0.00754770160033341	0.0310684461223026	0.0206938207891638	8055	tags=60%, list=38%, signal=37%	AKT1/MAP2K1/PIK3CB/MAPK8/ARAF/RAC3/PIK3CA/BAX/AKT3/APPL1/MAPK9/GSK3B/CYCS/MLH1/AXIN1/KRAS/PIK3R2/BAD/TP53/PIK3R3/PIK3R5/AXIN2/RAC1/MSH2/MAPK3/RAF1/AKT2/APC/BRAF/RALGDS/CASP3/BIRC5/MAPK1/SMAD4/TGFB2/CASP9/RHOA
KEGG_GLYCOSYLPHOSPHATIDYLINOSITOL_GPI_ANCHOR_BIOSYNTHESIS	KEGG_GLYCOSYLPHOSPHATIDYLINOSITOL_GPI_ANCHOR_BIOSYNTHESIS	KEGG_GLYCOSYLPHOSPHATIDYLINOSITOL_GPI_ANCHOR_BIOSYNTHESIS	25	0.413421485274085	1.67415606265465	0.00933091059720975	0.0375357085387756	0.0250014829398921	11873	tags=96%, list=56%, signal=43%	PIGH/PIGM/PIGX/PIGP/PIGY/PIGN/DPM2/PIGS/PIGC/PIGG/PIGL/PIGF/PIGT/PIGB/PIGV/PIGW/PIGZ/GPAA1/PIGO/PIGU/PIGK/GPLD1/PIGQ/PIGA
KEGG_AMINO_SUGAR_AND_NUCLEOTIDE_SUGAR_METABOLISM	KEGG_AMINO_SUGAR_AND_NUCLEOTIDE_SUGAR_METABOLISM	KEGG_AMINO_SUGAR_AND_NUCLEOTIDE_SUGAR_METABOLISM	41	0.350978944550804	1.5705164076627	0.0108268710155471	0.042585692661152	0.0283651357600299	9214	tags=68%, list=43%, signal=39%	PGM3/GFPT1/GNPNAT1/NANS/CMAS/GALT/NANP/GNE/HK1/HEXB/CYB5R1/GNPDA1/UAP1/UGDH/PMM1/MPI/GNPDA2/GMPPA/FPGT/GALE/AMDHD2/GPI/NAGK/HEXA/PGM2/UGP2/GALK2/PMM2
KEGG_ACUTE_MYELOID_LEUKEMIA	KEGG_ACUTE_MYELOID_LEUKEMIA	KEGG_ACUTE_MYELOID_LEUKEMIA	57	0.321623842241513	1.53528679134368	0.0114564315616806	0.0440823562264668	0.029362021393781	9546	tags=65%, list=45%, signal=36%	AKT1/MAP2K1/PIK3CB/ARAF/IKBKG/MTOR/RELA/PIK3CA/JUP/AKT3/CEBPA/KRAS/PIK3R2/ZBTB16/BAD/PIK3R3/PIK3R5/CHUK/SOS2/MAPK3/RAF1/MAP2K2/STAT3/AKT2/NRAS/BRAF/IKBKB/GRB2/MAPK1/PPARD/RPS6KB1/SOS1/RPS6KB2/PIM1/HRAS/NFKB1/STAT5B
KEGG_BASE_EXCISION_REPAIR	KEGG_BASE_EXCISION_REPAIR	KEGG_BASE_EXCISION_REPAIR	32	0.375794318027394	1.60849642637743	0.0119285807939168	0.044922527670708	0.029921636034013	8561	tags=72%, list=40%, signal=43%	LIG3/NTHL1/POLD4/POLB/TDG/POLD2/LIG1/POLE3/MPG/HMGB1/PARP1/APEX2/MUTYH/SMUG1/PARP4/UNG/POLE4/APEX1/PARP2/PCNA/PARP3/POLL/POLE
KEGG_GLYCINE_SERINE_AND_THREONINE_METABOLISM	KEGG_GLYCINE_SERINE_AND_THREONINE_METABOLISM	KEGG_GLYCINE_SERINE_AND_THREONINE_METABOLISM	31	0.387670857314465	1.64270253932844	0.0134955008958382	0.0497646595534035	0.0331468443055676	5635	tags=52%, list=26%, signal=38%	PSAT1/GCAT/CBS/CHDH/PHGDH/CTH/DAO/AOC2/DLD/PIPOX/SRR/ALAS2/GAMT/GLDC/MAOA/SHMT2
KEGG_MISMATCH_REPAIR	KEGG_MISMATCH_REPAIR	KEGG_MISMATCH_REPAIR	23	0.416673480273033	1.65084104996131	0.0146627568291709	0.0529654685461886	0.035278813423569	10468	tags=87%, list=49%, signal=44%	POLD4/RFC5/RPA1/POLD2/LIG1/MLH1/MSH2/RPA4/RPA2/RPA3/SSBP1/RFC1/MLH3/PCNA/RFC3/PMS2/MSH3/RFC4/POLD1/MSH6
KEGG_PANTOTHENATE_AND_COA_BIOSYNTHESIS	KEGG_PANTOTHENATE_AND_COA_BIOSYNTHESIS	KEGG_PANTOTHENATE_AND_COA_BIOSYNTHESIS	16	0.466996031621818	1.68745461721374	0.0170736516303727	0.0592556144818818	0.039468503252874	6997	tags=69%, list=33%, signal=46%	BCAT2/COASY/PANK3/PPCDC/DPYS/PANK2/PANK4/PPCS/ENPP1/UPB1/ENPP3
KEGG_OTHER_GLYCAN_DEGRADATION	KEGG_OTHER_GLYCAN_DEGRADATION	KEGG_OTHER_GLYCAN_DEGRADATION	16	0.46607458285204	1.68412503221558	0.0170736516303727	0.0592556144818818	0.039468503252874	7500	tags=75%, list=35%, signal=49%	NEU1/FUCA1/AGA/NEU3/HEXB/MAN2C1/FUCA2/GBA/ENGASE/MAN2B2/GLB1/HEXA
KEGG_TIGHT_JUNCTION	KEGG_TIGHT_JUNCTION	KEGG_TIGHT_JUNCTION	128	0.258897376800142	1.37842459867841	0.0178734195963761	0.0608383705492031	0.0405227326881401	10859	tags=64%, list=51%, signal=32%	IGSF5/PRKCI/PRKCZ/RAB3B/LLGL2/MPP5/YES1/AKT1/PRKCH/CGN/PRKCD/PPP2CA/CSNK2A1/CDC42/CSNK2B/CLDN7/MAGI2/TJP2/F11R/AKT3/AMOTL1/ASH1L/CLDN3/GNAI3/EPB41/PPP2CB/RAB13/VAPA/KRAS/PPP2R2A/PPP2R1A/MAGI3/MYL5/MYH15/TJP1/CLDN8/CLDN16/MYH9/RRAS2/CLDN15/CTNNA1/CTTN/CLDN23/PPP2R1B/AKT2/MYL12B/NRAS/CLDN14/CSNK2A2/PARD6B/MYL12A/CDK4/TJAP1/OCLN/GNAI1/MYH14/CLDN18/MYH10/MAGI1/CASK/RHOA/PPP2R2D/PPP2R2C/SYMPK/CLDN19/S…
KEGG_SELENOAMINO_ACID_METABOLISM	KEGG_SELENOAMINO_ACID_METABOLISM	KEGG_SELENOAMINO_ACID_METABOLISM	24	0.404171698272344	1.62078350311823	0.0225126106989673	0.0751836244097588	0.0500777040374249	10970	tags=83%, list=51%, signal=40%	AHCY/CBS/GGT1/CTH/LCMT2/SEPHS2/LCMT1/MAT2B/HEMK1/SCLY/SEPHS1/MAT2A/GGT7/TRMT11/MARS2/AHCYL1/PAPSS1/METTL2B/AHCYL2/GGT6
KEGG_RIBOFLAVIN_METABOLISM	KEGG_RIBOFLAVIN_METABOLISM	KEGG_RIBOFLAVIN_METABOLISM	14	0.471395946952691	1.64922989685894	0.0232460148349493	0.0761952708478894	0.0507515333628523	3936	tags=57%, list=18%, signal=47%	MTMR2/ACP6/ACP2/PHPT1/ACP1/FLAD1/MTMR1/RFK
KEGG_BIOSYNTHESIS_OF_UNSATURATED_FATTY_ACIDS	KEGG_BIOSYNTHESIS_OF_UNSATURATED_FATTY_ACIDS	KEGG_BIOSYNTHESIS_OF_UNSATURATED_FATTY_ACIDS	19	0.440365286501135	1.66786183366099	0.0253537710244079	0.0811076563398298	0.0540235355935828	7103	tags=68%, list=33%, signal=46%	ELOVL5/ACAA1/ELOVL2/SCD/FADS1/HADHA/YOD1/FADS2/TECR/ELOVL6/HSD17B12/ACOX1/ACOX3
KEGG_NICOTINATE_AND_NICOTINAMIDE_METABOLISM	KEGG_NICOTINATE_AND_NICOTINAMIDE_METABOLISM	KEGG_NICOTINATE_AND_NICOTINAMIDE_METABOLISM	24	0.39749721971491	1.5940179359495	0.0256611794069518	0.0811076563398298	0.0540235355935828	8224	tags=62%, list=39%, signal=38%	NADSYN1/NT5C2/NADK/CD38/NT5C1A/PNP/NUDT12/AOX1/ENPP1/ENPP3/NT5C/NMRK1/NT5C1B/NMNAT1/NT5C3A
KEGG_AMINOACYL_TRNA_BIOSYNTHESIS	KEGG_AMINOACYL_TRNA_BIOSYNTHESIS	KEGG_AMINOACYL_TRNA_BIOSYNTHESIS	21	0.410425403763343	1.58589961511102	0.0265957446808511	0.0823142374866513	0.0548272054624142	8761	tags=76%, list=41%, signal=45%	NARS2/RARS2/EARS2/FARSA/IARS2/FARSB/MTFMT/CARS2/LARS2/AARS2/DARS2/YARS2/HARS2/SEPSECS/SARS2/MARS2
KEGG_GLIOMA	KEGG_GLIOMA	KEGG_GLIOMA	63	0.306733391852784	1.49519742567975	0.026973026973027	0.0823142374866513	0.0548272054624142	7565	tags=52%, list=35%, signal=34%	PDGFA/IGF1R/AKT1/MAP2K1/PIK3CB/ARAF/MTOR/EGF/PIK3CA/AKT3/CAMK2D/KRAS/PIK3R2/CAMK2B/TP53/PIK3R3/PIK3R5/SOS2/CAMK2G/MAPK3/RAF1/MAP2K2/AKT2/CALML3/NRAS/RB1/BRAF/CDK4/MDM2/GRB2/MAPK1/SHC2/CALM1
KEGG_SPHINGOLIPID_METABOLISM	KEGG_SPHINGOLIPID_METABOLISM	KEGG_SPHINGOLIPID_METABOLISM	33	0.356947550909724	1.53721389224258	0.0318602261048304	0.0955806783144913	0.0636636097009992	7598	tags=58%, list=36%, signal=37%	NEU1/SGMS2/SPTLC2/SGPL1/SMPD3/SGMS1/DEGS1/NEU3/ASAH1/GALC/ACER3/SPHK2/ENPP7/GBA/SPTLC1/SMPD1/SMPD2/GLB1/SGPP1
KEGG_SNARE_INTERACTIONS_IN_VESICULAR_TRANSPORT	KEGG_SNARE_INTERACTIONS_IN_VESICULAR_TRANSPORT	KEGG_SNARE_INTERACTIONS_IN_VESICULAR_TRANSPORT	37	0.341187489083529	1.49763034375851	0.036697247706422	0.10725340233537	0.0714384838629877	10009	tags=73%, list=47%, signal=39%	VAMP8/SNAP29/SNAP23/BET1L/BET1/SEC22B/BNIP1/STX18/GOSR1/STX3/VTI1B/STX10/STX17/STX12/STX16/STX4/STX11/VAMP2/VAMP1/TSNARE1/STX5/STX8/STX19/STX7/VAMP7/STX6/YKT6
KEGG_WNT_SIGNALING_PATHWAY	KEGG_WNT_SIGNALING_PATHWAY	KEGG_WNT_SIGNALING_PATHWAY	147	0.239883232594859	1.29798237957862	0.036963036963037	0.10725340233537	0.0714384838629877	10466	tags=59%, list=49%, signal=30%	CHP1/CTNNBIP1/CSNK1A1/TBL1XR1/DAAM1/FRAT1/PPP2CA/MAPK8/FRAT2/CSNK2A1/PPP2R5D/CSNK2B/EP300/RAC3/RBX1/FZD6/CTBP2/BTRC/SENP2/CAMK2D/DVL3/MAPK9/PPP2CB/CREBBP/GSK3B/DVL1/AXIN1/WNT9A/PLCB1/PPP3CA/PPP2R1A/FZD4/CAMK2B/TP53/WNT5B/FZD3/PSEN1/FZD5/CTBP1/AXIN2/RAC1/PPP3CC/CAMK2G/PPP3R2/CHD8/PPP2R1B/MAP3K7/CSNK2A2/APC/CXXC4/PRKACB/FBXW11/PPP3R1/VANGL1/LRP5/DVL2/ROCK1/CSNK1E/VANGL2/SMAD4/CER1/PPP2R5C/WNT8A/FZD…
KEGG_LONG_TERM_POTENTIATION	KEGG_LONG_TERM_POTENTIATION	KEGG_LONG_TERM_POTENTIATION	68	0.288128730320117	1.41344497415612	0.042957042957043	0.118803071928072	0.0791313949208686	9266	tags=57%, list=43%, signal=33%	CHP1/PPP1CA/MAP2K1/ARAF/EP300/ATF4/RPS6KA1/CAMK2D/CREBBP/RPS6KA3/PLCB1/PPP3CA/KRAS/CAMK2B/GRIN2D/RPS6KA2/PPP3CC/CAMK2G/MAPK3/RAF1/MAP2K2/PPP3R2/CALML3/NRAS/PRKACB/PPP3R1/BRAF/ITPR2/PPP1CC/MAPK1/CALM1/PPP1CB/RAP1B/ADCY1/GNAQ/PLCB4/CHP2/PRKACA/HRAS
KEGG_EPITHELIAL_CELL_SIGNALING_IN_HELICOBACTER_PYLORI_INFECTION	KEGG_EPITHELIAL_CELL_SIGNALING_IN_HELICOBACTER_PYLORI_INFECTION	KEGG_EPITHELIAL_CELL_SIGNALING_IN_HELICOBACTER_PYLORI_INFECTION	68	0.2879487107516	1.41256186973926	0.042957042957043	0.118803071928072	0.0791313949208686	9481	tags=63%, list=44%, signal=35%	IGSF5/ATP6AP1/ADAM10/ATP6V1G1/ATP6V0B/ATP6V1H/MAPK8/IKBKG/CDC42/ATP6V0A1/RELA/F11R/ATP6V1E2/MAP2K4/ATP6V0D1/MAPK9/ATP6V1A/ATP6V1D/ATP6V0E1/ATP6V1B2/CHUK/TJP1/RAC1/ATP6V1F/ATP6V0C/ATP6V1B1/ATP6V0E2/CASP3/IKBKB/GIT1/MAPK13/CSK/PTPN11/ADAM17/ATP6V0A2/ATP6V1G2/ATP6V1C1/NOD1/MAPK14/MAPK10/SRC/MET/NFKB1
KEGG_CELL_CYCLE	KEGG_CELL_CYCLE	KEGG_CELL_CYCLE	124	0.248867684137557	1.31776361276722	0.042957042957043	0.118803071928072	0.0791313949208686	7606	tags=49%, list=36%, signal=32%	ORC5/YWHAE/HDAC2/ANAPC11/TFDP1/CCNH/ORC4/E2F4/EP300/RBX1/CDK7/CCNB2/CDKN1B/ABL1/ANAPC10/YWHAQ/CCNA2/STAG2/CDC16/ANAPC2/YWHAG/ANAPC13/CREBBP/GSK3B/ANAPC7/HDAC1/CDC26/MAD1L1/MCM2/RBL2/SFN/PTTG1/ATR/TP53/PKMYT1/TFDP2/FZR1/YWHAZ/SMC1A/ESPL1/CCNE2/DBF4/CDKN1C/RB1/ZBTB17/CDK4/ANAPC5/MDM2/SKP2/ANAPC1/CCNE1/CDC23/MCM3/CCNB1/YWHAB/BUB3/CDK2/RAD21/PRKDC/SMAD4/TGFB2
KEGG_VASOPRESSIN_REGULATED_WATER_REABSORPTION	KEGG_VASOPRESSIN_REGULATED_WATER_REABSORPTION	KEGG_VASOPRESSIN_REGULATED_WATER_REABSORPTION	44	0.317423048550415	1.44406384221038	0.0454545454545455	0.123776223776224	0.0824438719175561	10348	tags=68%, list=49%, signal=35%	CREB3L4/AQP3/DYNLL2/RAB11A/RAB5A/GNAS/ADCY6/CREB3/DYNC1LI2/DCTN6/RAB5B/RAB5C/DYNC1H1/DCTN4/ARHGDIA/DYNC1LI1/CREB3L2/DYNC1I2/PRKACB/STX4/VAMP2/DCTN5/DYNLL1/PRKACA/DCTN1/CREB1/DCTN2/DYNC2LI1/PRKX/NSF

## Sheet: SORD
	ID	Description	setSize	enrichmentScore	NES	pvalue	p.adjust	qvalue	rank	leading_edge	core_enrichment
KEGG_OXIDATIVE_PHOSPHORYLATION	KEGG_OXIDATIVE_PHOSPHORYLATION	KEGG_OXIDATIVE_PHOSPHORYLATION	99	0.437526729022354	2.25910059246139	6.05503928624214e-10	1.05233729377779e-07	7.56944369208583e-08	7188	tags=70%, list=34%, signal=46%	ATP6AP1/ATP6V1G1/ATP6V0B/COX6A1/NDUFV3/ATP6V1H/NDUFV2/NDUFC1/NDUFS3/COX8A/UQCR10/COX17/COX7A2/NDUFA2/UQCR11/NDUFC2/ATP6V0A1/SDHC/ATP6V1D/PPA2/CYC1/NDUFA7/COX7B/NDUFB1/UQCRQ/ATP6V1E2/COX5A/NDUFB3/NDUFAB1/SDHB/NDUFB2/NDUFA1/UQCRC1/ATP6V1A/NDUFS7/NDUFB4/NDUFS2/COX6B1/NDUFS6/ATP6V0D1/NDUFB6/NDUFS1/COX4I2/ATP6V1F/COX5B/UQCRH/NDUFA11/NDUFB10/UQCRFS1/ATP6V1B2/ATP6V0E1/COX7C/COX7A2L/NDUFA10/SDHA/ATP6V0E2…
KEGG_HUNTINGTONS_DISEASE	KEGG_HUNTINGTONS_DISEASE	KEGG_HUNTINGTONS_DISEASE	156	0.383744857510415	2.09114109454229	1.16926365975309e-09	1.05233729377779e-07	7.56944369208583e-08	7287	tags=63%, list=34%, signal=42%	CREB3L4/DNALI1/COX6A1/NDUFV3/NDUFV2/NDUFC1/NDUFS3/COX8A/UQCR10/COX7A2/NDUFA2/CREB3/EP300/UQCR11/NDUFC2/TBPL1/HDAC2/AP2A2/RCOR1/AP2S1/TFAM/POLR2L/SDHC/CYC1/NDUFA7/COX7B/NDUFB1/IFT57/SLC25A4/UQCRQ/COX5A/DNAL1/NDUFB3/NDUFAB1/SDHB/POLR2D/BAX/NDUFB2/POLR2C/NDUFA1/UQCRC1/NDUFS7/NDUFB4/NDUFS2/PLCB1/APAF1/COX6B1/BBC3/VDAC1/NDUFS6/DNAH3/CLTC/POLR2F/SOD1/POLR2H/SLC25A5/DNAL4/NDUFB6/NDUFS1/CREB3L2/POLR2E/CO…
KEGG_VALINE_LEUCINE_AND_ISOLEUCINE_DEGRADATION	KEGG_VALINE_LEUCINE_AND_ISOLEUCINE_DEGRADATION	KEGG_VALINE_LEUCINE_AND_ISOLEUCINE_DEGRADATION	43	0.550037766599282	2.49499142849403	4.65058708994628e-09	2.79035225396777e-07	2.00709548092418e-07	5718	tags=74%, list=27%, signal=55%	AUH/PCCA/ALDH6A1/ACAD8/BCAT2/ACAT2/HMGCL/ALDH7A1/ECHS1/MCEE/MCCC2/ALDH3A2/IVD/PCCB/ABAT/ACAA1/HMGCS1/HIBCH/HIBADH/ACADSB/ACADM/HADHA/MCCC1/EHHADH/DBT/HMGCS2/BCKDHA/DLD/ACAT1/ALDH9A1/HADHB/OXCT1
KEGG_PARKINSONS_DISEASE	KEGG_PARKINSONS_DISEASE	KEGG_PARKINSONS_DISEASE	96	0.412942568903631	2.12116015810162	2.55703787510959e-08	1.15066704379932e-06	8.27672785890736e-07	10648	tags=84%, list=50%, signal=42%	UBE2J1/COX6A1/NDUFV3/NDUFV2/NDUFC1/NDUFS3/COX8A/UBA1/UQCR10/COX7A2/PARK7/NDUFA2/UQCR11/NDUFC2/SDHC/CYC1/NDUFA7/COX7B/NDUFB1/SLC25A4/UQCRQ/COX5A/NDUFB3/NDUFAB1/SDHB/UBE2L3/NDUFB2/NDUFA1/UQCRC1/PINK1/NDUFS7/NDUFB4/NDUFS2/APAF1/COX6B1/VDAC1/NDUFS6/SLC25A5/NDUFB6/NDUFS1/UBE2G1/COX4I2/SLC18A2/COX5B/UQCRH/UBE2J2/NDUFB10/CYCS/UQCRFS1/COX7C/COX7A2L/NDUFA10/SDHA/NDUFA6/HTRA2/UQCRB/NDUFS5/NDUFB5/NDUFA4/SNC…
KEGG_ALZHEIMERS_DISEASE	KEGG_ALZHEIMERS_DISEASE	KEGG_ALZHEIMERS_DISEASE	141	0.364003724430606	1.96494136210551	1.69670255709161e-07	6.10812920552981e-06	4.39356662152144e-06	9352	tags=72%, list=44%, signal=40%	ADAM10/COX6A1/CHP1/NDUFV3/NDUFV2/NDUFC1/NDUFS3/COX8A/EIF2AK3/ATP2A3/UQCR10/COX7A2/CDK5/NDUFA2/UQCR11/NDUFC2/SDHC/CYC1/NDUFA7/COX7B/NDUFB1/PSEN2/UQCRQ/COX5A/NDUFB3/NDUFAB1/SDHB/NDUFB2/NDUFA1/UQCRC1/IDE/CASP7/NDUFS7/NDUFB4/NDUFS2/PLCB1/APAF1/COX6B1/NDUFS6/PPP3CA/MME/NCSTN/PSEN1/FADD/NDUFB6/NDUFS1/BAD/COX4I2/COX5B/UQCRH/MAPK3/NDUFB10/GSK3B/CYCS/ITPR2/PPP3R2/UQCRFS1/GRIN2D/COX7C/COX7A2L/PPP3CC/NDUFA1…
KEGG_PEROXISOME	KEGG_PEROXISOME	KEGG_PEROXISOME	78	0.432481479345537	2.1618396319385	2.18167682540149e-07	6.54503047620446e-06	4.70782893902426e-06	5228	tags=59%, list=25%, signal=45%	ACSL3/ACSL1/NUDT19/CRAT/PXMP2/HMGCL/PXMP4/EPHX2/PEX7/PEX13/DAO/SLC27A2/SCP2/ECH1/SLC25A17/PIPOX/PAOX/IDH1/ACAA1/MPV17L/ACOT8/PEX10/PEX3/PEX11A/PEX11G/ACOX3/PRDX1/PEX26/CAT/ECI2/SOD1/GNPAT/MVK/DHRS4/PEX11B/MLYCD/NUDT12/XDH/EHHADH/PEX2/PEX12/PEX1/IDH2/PRDX5/HACL1/ABCD4
KEGG_UBIQUITIN_MEDIATED_PROTEOLYSIS	KEGG_UBIQUITIN_MEDIATED_PROTEOLYSIS	KEGG_UBIQUITIN_MEDIATED_PROTEOLYSIS	127	0.358202991707155	1.9041832858522	9.32647675546795e-07	2.05558867286046e-05	1.47858132609261e-05	8601	tags=68%, list=40%, signal=41%	UBE2J1/NEDD4L/UBA1/RCHY1/UBE4A/PPIL2/UBE2Q2/WWP1/UBE2N/BIRC6/UBE2D4/ANAPC11/TRIP12/UBE2S/PRPF19/RNF7/HERC3/RBX1/CUL5/CUL4A/CUL3/STUB1/UBE2E1/UBE2L3/BIRC2/KLHL9/UBE3B/ANAPC2/UBE3C/UBE2Z/UBE2M/FZR1/TRIM37/UBE2K/KEAP1/MGRN1/BTRC/UBE4B/CUL7/UBR5/ANAPC10/DDB1/CUL2/UBE2G1/UBE2R2/UBE2H/UBE2D1/ANAPC13/UBE2B/WWP2/TRIM32/UBE2I/XIAP/ANAPC7/UBE2J2/ERCC8/CDC16/SMURF2/HERC2/PIAS4/PIAS1/FBXW11/CDC26/UBE2D3/ITCH…
KEGG_SPLICEOSOME	KEGG_SPLICEOSOME	KEGG_SPLICEOSOME	118	0.35990495108215	1.89439374233803	1.00109702648729e-06	2.05558867286046e-05	1.47858132609261e-05	10435	tags=81%, list=49%, signal=41%	BCAS2/HSPA1A/SF3A1/LSM6/SRSF5/SRSF8/NCBP1/PRPF19/HSPA8/EIF4A3/CDC40/SNRPB/SF3B5/THOC1/PRPF4/PCBP1/TXNL4A/CRNKL1/SNRPD3/LSM4/SNRNP27/WBP11/XAB2/SF3B6/SNRNP70/HNRNPC/HNRNPU/SNRPG/SRSF6/SNRPD1/SF3B4/ACIN1/CHERP/DDX46/DHX15/SNRPC/HNRNPK/PRPF18/DHX16/SNRPE/DHX38/LSM5/THOC2/AQR/SRSF3/SNRPA1/NCBP2/PRPF38B/PRPF40A/CWC15/BUD31/PRPF38A/SF3B1/PPIH/SF3B3/SRSF1/PUF60/RBM8A/U2SURP/PRPF8/LSM8/SNRNP200/TRA2B/SNR…
KEGG_STEROID_BIOSYNTHESIS	KEGG_STEROID_BIOSYNTHESIS	KEGG_STEROID_BIOSYNTHESIS	17	0.683948665306853	2.45088492615539	1.02779433643023e-06	2.05558867286046e-05	1.47858132609261e-05	1358	tags=65%, list=6%, signal=61%	DHCR24/SC5D/SQLE/CYP51A1/LSS/MSMO1/FDFT1/DHCR7/HSD17B7/SOAT1/EBP
KEGG_RNA_DEGRADATION	KEGG_RNA_DEGRADATION	KEGG_RNA_DEGRADATION	54	0.449858137490453	2.13081619959065	6.29383646280701e-06	0.000113289056330526	8.1488619465817e-05	8749	tags=81%, list=41%, signal=48%	CNOT6/LSM6/CNOT6L/EXOSC3/WDR61/PAPOLG/CNOT3/LSM4/MPHOSPH6/CNOT8/C1D/PAPOLA/HSPA9/HSPD1/CNOT1/PNPT1/SKIV2L/ENO3/LSM5/PARN/DCPS/PATL1/CNOT7/EXOSC7/ZCCHC7/EDC4/EXOSC5/CNOT10/TTC37/EXOSC4/LSM1/LSM8/LSM3/EDC3/EXOSC2/XRN2/EXOSC8/DCP2/XRN1/DCP1A/EXOSC1/EXOSC9/CNOT4/EXOSC6
KEGG_TERPENOID_BACKBONE_BIOSYNTHESIS	KEGG_TERPENOID_BACKBONE_BIOSYNTHESIS	KEGG_TERPENOID_BACKBONE_BIOSYNTHESIS	15	0.662536353255409	2.29203598516248	1.0032674931443e-05	0.000164171044332704	0.000118087944169138	5399	tags=87%, list=25%, signal=65%	IDI1/HMGCR/ACAT2/FDPS/HMGCS1/IDI2/PDSS2/MVK/PDSS1/HMGCS2/GGPS1/ACAT1/DHDDS
KEGG_PROPANOATE_METABOLISM	KEGG_PROPANOATE_METABOLISM	KEGG_PROPANOATE_METABOLISM	31	0.521349809645818	2.20112852149856	1.88173765083151e-05	0.000282260647624726	0.000203029588642347	4949	tags=65%, list=23%, signal=50%	PCCA/ALDH6A1/ACAT2/ACSS1/ALDH7A1/ECHS1/MCEE/ALDH3A2/PCCB/ABAT/ACACA/SUCLG2/HIBCH/ACADM/HADHA/MLYCD/EHHADH/ACAT1/ALDH9A1/SUCLA2
KEGG_PROTEASOME	KEGG_PROTEASOME	KEGG_PROTEASOME	40	0.470905720537411	2.11035182109548	2.16877255811663e-05	0.000300291584969995	0.000215999210241575	5040	tags=62%, list=24%, signal=48%	PSMA4/PSMF1/PSMD3/PSMD11/PSMD7/PSMD8/PSMA2/PSMB3/PSMB6/PSMD13/PSMD14/PSMA7/PSMB2/PSMB5/PSMC5/PSMD12/PSMB7/PSMD1/PSMB1/POMP/PSME4/PSMA1/PSMC2/PSMD6/PSMA5
KEGG_CITRATE_CYCLE_TCA_CYCLE	KEGG_CITRATE_CYCLE_TCA_CYCLE	KEGG_CITRATE_CYCLE_TCA_CYCLE	30	0.515910817786156	2.16346305131479	2.42259616113961e-05	0.000311476649289378	0.000224044607383588	7663	tags=80%, list=36%, signal=51%	ACLY/PCK2/OGDH/IDH1/SDHC/SUCLG2/SDHB/MDH1/MDH2/CS/ACO2/PC/IDH3G/DLD/IDH3A/IDH2/SUCLA2/DLAT/SDHA/PDHB/SDHD/SUCLG1/IDH3B/DLST
KEGG_RENAL_CELL_CARCINOMA	KEGG_RENAL_CELL_CARCINOMA	KEGG_RENAL_CELL_CARCINOMA	66	0.387972029513964	1.8934959371574	6.8248213701975e-05	0.000805863908521654	0.000579656495603295	7423	tags=65%, list=35%, signal=43%	ARAF/MAP2K1/AKT1/FLCN/PAK4/PIK3R5/EP300/VEGFC/CRK/AKT3/RBX1/CDC42/PIK3CB/PIK3CA/HGF/CUL2/ARNT2/PAK2/PIK3R2/ARNT/MAPK3/PAK6/SLC2A1/VEGFB/KRAS/GRB2/PIK3R3/RAC1/PDGFB/CREBBP/GAB1/MAP2K2/EGLN2/AKT2/RAF1/TGFB2/BRAF/SOS2/MAPK1/CRKL/VEGFA/SOS1/MET
KEGG_ENDOCYTOSIS	KEGG_ENDOCYTOSIS	KEGG_ENDOCYTOSIS	171	0.294013334740878	1.61991298541523	7.1632347424147e-05	0.000805863908521654	0.000579656495603295	8922	tags=60%, list=42%, signal=35%	PRKCZ/ADRB2/CHMP5/IGF1R/FGFR3/PRKCI/RNF41/VPS25/NEDD4L/ARFGAP3/EGF/LDLRAP1/ARF6/VPS37C/STAMBP/EPN2/CHMP2B/ERBB3/HSPA1A/RAB5A/AGAP1/DNM2/CHMP2A/RAB4A/WWP1/AP2A2/PDCD6IP/HSPA8/AP2S1/STAM/RAB11FIP1/RAB11A/SH3GLB2/TSG101/CHMP4C/PIP5K1A/CDC42/ACAP1/VPS4B/ARFGAP2/SNF8/PSD4/EPN3/CHMP1B/VTA1/RAB11FIP3/CLTC/ADRB1/PIKFYVE/SH3GL2/CHMP3/RAB5C/SMAP1/PARD6B/ACAP3/CLTA/USP8/GRK6/AP2M1/PIP5K1C/SMURF2/STAM2/GIT1/…
KEGG_PROTEIN_EXPORT	KEGG_PROTEIN_EXPORT	KEGG_PROTEIN_EXPORT	22	0.548337419033666	2.12917245583177	9.85802344589393e-05	0.00104379071780053	0.000750796832102139	3018	tags=64%, list=14%, signal=55%	SEC11C/SPCS2/SRP54/HSPA5/SEC61B/SEC61G/SPCS1/SRP19/SRPRB/SPCS3/SEC63/SEC61A1/SRP9/SRP14
KEGG_LYSINE_DEGRADATION	KEGG_LYSINE_DEGRADATION	KEGG_LYSINE_DEGRADATION	39	0.454255762095543	2.02330202357072	0.000104681792551826	0.00104681792551826	0.000752974297302609	4862	tags=56%, list=23%, signal=44%	DOT1L/AADAT/ACAT2/ALDH7A1/ECHS1/ALDH3A2/GCDH/SETD7/PIPOX/OGDH/AASDHPPT/HADHA/SUV39H2/PLOD1/EHMT1/ASH1L/EHHADH/AASDH/PLOD2/SETD1B/ACAT1/ALDH9A1
KEGG_ENDOMETRIAL_CANCER	KEGG_ENDOMETRIAL_CANCER	KEGG_ENDOMETRIAL_CANCER	52	0.406947307956856	1.91013064126332	0.00016325164662904	0.00154659454701196	0.00111246274434194	7748	tags=65%, list=36%, signal=42%	CDH1/ARAF/EGF/MAP2K1/AKT1/PIK3R5/AXIN1/AKT3/ERBB2/PIK3CB/PIK3CA/ELK1/FOXO3/BAD/PIK3R2/MLH1/AXIN2/MAPK3/GSK3B/KRAS/GRB2/PIK3R3/APC/CTNNB1/MAP2K2/CTNNA1/AKT2/TP53/RAF1/BRAF/SOS2/MAPK1/SOS1/NRAS
KEGG_NEUROTROPHIN_SIGNALING_PATHWAY	KEGG_NEUROTROPHIN_SIGNALING_PATHWAY	KEGG_NEUROTROPHIN_SIGNALING_PATHWAY	122	0.317639147382756	1.68046731034865	0.000182515170621471	0.00164214971626463	0.00118119540994473	10012	tags=69%, list=47%, signal=37%	PRKCD/ZNF274/MAP2K1/YWHAE/AKT1/MAGED1/PIK3R5/RPS6KA1/CAMK2B/IRAK1/CRK/ATF4/ABL1/AKT3/CDC42/PIK3CB/PIK3CA/BAX/YWHAQ/RPS6KA4/MAPK8/MAPK9/RPS6KA2/FOXO3/PSEN1/BAD/RELA/RIPK2/CAMK2G/PIK3R2/YWHAG/IRS1/MAPK13/MAPK3/GSK3B/KRAS/GRB2/PIK3R3/RAC1/CAMK2D/ARHGDIA/RPS6KA3/MAP2K7/GAB1/MAP2K2/CALML3/SHC2/AKT2/YWHAZ/TP53/RAF1/NFKBIE/KIDINS220/BDNF/BRAF/SOS2/CSK/SH2B2/MAP2K5/MAPK1/CRKL/SH2B1/MAP3K5/SOS1/NRAS/MAPK1…
KEGG_INSULIN_SIGNALING_PATHWAY	KEGG_INSULIN_SIGNALING_PATHWAY	KEGG_INSULIN_SIGNALING_PATHWAY	134	0.305988128823405	1.63922173622915	0.000191584133564206	0.00164214971626463	0.00118119540994473	10533	tags=69%, list=49%, signal=35%	PRKCZ/PRKCI/ARAF/INSR/MAP2K1/MTOR/PTPRF/AKT1/GYS1/PPP1R3D/PPP1CA/FASN/PRKAR2A/INPP5K/PCK2/PIK3R5/PHKA2/EIF4E/FBP1/CRK/AKT3/PRKAG1/ACACA/EXOC7/PIK3CB/PRKAA2/HK1/MKNK2/PIK3CA/ELK1/MAPK8/MAPK9/PDE3B/MKNK1/PHKB/BAD/PRKACA/PHKA1/PIK3R2/IRS1/FLOT2/MAPK3/PRKAA1/GSK3B/KRAS/GRB2/PIK3R3/PYGL/MAP2K2/TSC1/CALML3/SHC2/AKT2/PRKAR1B/RAF1/PTPN1/SREBF1/PRKAG2/BRAF/PYGB/SOS2/SH2B2/MAPK1/CRKL/RHEB/SOCS4/SOS1/PHKG2/…
KEGG_BETA_ALANINE_METABOLISM	KEGG_BETA_ALANINE_METABOLISM	KEGG_BETA_ALANINE_METABOLISM	22	0.527461680707998	2.04811279166278	0.000229354845983276	0.00187653964895408	0.00134979167731784	4862	tags=59%, list=23%, signal=46%	SMS/ALDH7A1/DPYS/ECHS1/ALDH3A2/AOC2/ABAT/HIBCH/ACADM/HADHA/MLYCD/EHHADH/ALDH9A1
KEGG_FATTY_ACID_METABOLISM	KEGG_FATTY_ACID_METABOLISM	KEGG_FATTY_ACID_METABOLISM	40	0.426720795916854	1.91233822289254	0.000326151621241195	0.00255249094884413	0.00183600226144929	5282	tags=55%, list=25%, signal=41%	ACSL3/ACSL1/ACAT2/ACADL/ALDH7A1/ECHS1/ALDH3A2/GCDH/ECI1/ACAA1/ADH5/CPT2/ACOX3/ACADSB/ACADM/HADHA/ECI2/CPT1A/EHHADH/ACAT1/ALDH9A1/HADHB
KEGG_PROSTATE_CANCER	KEGG_PROSTATE_CANCER	KEGG_PROSTATE_CANCER	88	0.330313499917334	1.67905218946484	0.000416958543405087	0.00312718907553815	0.00224938161573797	7832	tags=57%, list=37%, signal=36%	CREB3L4/IGF1R/ARAF/EGF/MAP2K1/MTOR/AKT1/PDGFA/KLK3/CREB3/PIK3R5/EP300/IKBKG/ATF4/AKT3/ERBB2/PIK3CB/PIK3CA/CDKN1B/HSP90AA1/BAD/RELA/CREB3L2/HSP90B1/HSP90AB1/PIK3R2/MAPK3/CCNE2/GSK3B/KRAS/GRB2/PIK3R3/PDGFB/CREBBP/CTNNB1/MAP2K2/CHUK/AKT2/TP53/RAF1/MDM2/CDK2/BRAF/SOS2/MAPK1/RB1/CCNE1/SOS1/NRAS/IKBKB
KEGG_PURINE_METABOLISM	KEGG_PURINE_METABOLISM	KEGG_PURINE_METABOLISM	147	0.287133320775064	1.55513842167953	0.000847193850113918	0.00609979572082021	0.00438757236058997	10153	tags=67%, list=48%, signal=35%	ADPRM/CANT1/ENTPD4/NME4/PDE8B/PDE9A/POLR3A/POLR1D/ENTPD6/APRT/NME3/POLR3H/POLD4/PRIM2/ADCY6/NUDT9/POLR1C/AK4/POLR2L/IMPDH1/NT5C2/POLR3B/POLR2D/POLR2C/FHIT/PRPS1/DGUOK/PDE3B/POLD2/ENPP3/POLR2F/POLR2H/POLR3K/PAICS/PDE11A/AK7/POLR2E/AK2/NT5C1A/PDE7A/XDH/PNPT1/PDE1B/PDE6G/ADCY1/POLR2B/ENPP1/POLR2G/POLR2J/NT5C/ADSL/NPR2/POLE3/ITPA/PKM/GMPS/POLA2/POLR2K/POLR3D/NME6/PFAS/AMPD3/PRPS2/GUK1/ADK/POLR3GL/GMP…
KEGG_ERBB_SIGNALING_PATHWAY	KEGG_ERBB_SIGNALING_PATHWAY	KEGG_ERBB_SIGNALING_PATHWAY	86	0.327126040183897	1.65852312858204	0.00126096403591905	0.00847415239983197	0.0060954429542651	8411	tags=59%, list=39%, signal=36%	ARAF/EGF/MAP2K1/MTOR/AKT1/ERBB3/BTC/NRG4/PAK4/PIK3R5/MAP2K4/NRG1/CAMK2B/CRK/ABL1/AKT3/ERBB2/PIK3CB/PIK3CA/ELK1/MAPK8/MAPK9/CDKN1B/BAD/CAMK2G/PAK2/PIK3R2/MAPK3/NCK2/PAK6/GSK3B/KRAS/GRB2/PIK3R3/CAMK2D/MAP2K7/GAB1/MAP2K2/SHC2/AKT2/RAF1/BRAF/SOS2/MAPK1/CRKL/SOS1/NRAS/MAPK10/SRC/PTK2/NCK1
KEGG_MTOR_SIGNALING_PATHWAY	KEGG_MTOR_SIGNALING_PATHWAY	KEGG_MTOR_SIGNALING_PATHWAY	50	0.376175975880165	1.75376928882078	0.0012711228599748	0.00847415239983197	0.0060954429542651	10721	tags=80%, list=50%, signal=40%	MTOR/AKT1/CAB39L/PIK3R5/RPS6KA1/VEGFC/EIF4E/ULK3/AKT3/PIK3CB/PRKAA2/PIK3CA/RICTOR/RPS6KA2/STK11/CAB39/PIK3R2/MAPK3/PRKAA1/VEGFB/ULK1/PIK3R3/MLST8/RPS6KA3/TSC1/AKT2/ULK2/BRAF/MAPK1/RHEB/VEGFA/EIF4E2/RPS6/RPS6KB2/RPTOR/PGF/RPS6KB1/EIF4B/TSC2/INS
KEGG_BUTANOATE_METABOLISM	KEGG_BUTANOATE_METABOLISM	KEGG_BUTANOATE_METABOLISM	33	0.430799039840267	1.84995027815676	0.00145572070019964	0.00935820450128342	0.00673134007987053	5718	tags=58%, list=27%, signal=42%	AACS/BDH1/ACAT2/HMGCL/ALDH7A1/ECHS1/ALDH3A2/ABAT/HMGCS1/HADHA/L2HGDH/EHHADH/HMGCS2/ALDH5A1/ACAT1/ALDH9A1/ACSM3/PDHB/OXCT1
KEGG_N_GLYCAN_BIOSYNTHESIS	KEGG_N_GLYCAN_BIOSYNTHESIS	KEGG_N_GLYCAN_BIOSYNTHESIS	45	0.386077185340616	1.76524587056006	0.00157915470313125	0.00980164988150432	0.00705030956388907	11010	tags=84%, list=52%, signal=41%	ALG3/TUSC3/ALG2/ALG1/DPAGT1/B4GALT3/DPM2/RFT1/ALG8/RPN2/DOLPP1/RPN1/DPM3/B4GALT1/ALG5/B4GALT2/ALG11/MGAT2/MGAT4A/MGAT4B/GANAB/DDOST/ALG6/MOGS/ALG12/DAD1/MGAT1/ALG9/STT3B/ALG13/ST6GAL1/MAN2A2/MAN1A2/MAN2A1/DPM1/STT3A/ALG14/MAN1B1
KEGG_GLYCOSYLPHOSPHATIDYLINOSITOL_GPI_ANCHOR_BIOSYNTHESIS	KEGG_GLYCOSYLPHOSPHATIDYLINOSITOL_GPI_ANCHOR_BIOSYNTHESIS	KEGG_GLYCOSYLPHOSPHATIDYLINOSITOL_GPI_ANCHOR_BIOSYNTHESIS	25	0.449861377852479	1.80126136034331	0.00167775823301958	0.0100665493981175	0.00724085132145293	10381	tags=92%, list=49%, signal=47%	PIGH/DPM2/PIGM/PIGX/PIGN/PIGP/PIGT/PIGG/PIGY/PIGS/PIGV/PIGC/PIGL/PIGF/PIGB/PIGU/GPLD1/PIGZ/PIGQ/PIGO/PIGW/GPAA1/PIGA
KEGG_OOCYTE_MEIOSIS	KEGG_OOCYTE_MEIOSIS	KEGG_OOCYTE_MEIOSIS	108	0.306694732742466	1.59947380263909	0.00175797877787988	0.0102076187102703	0.00734232223019441	9475	tags=64%, list=44%, signal=36%	IGF1R/CHP1/MAP2K1/YWHAE/PPP1CA/PPP2R5D/PKMYT1/ADCY6/RPS6KA1/CAMK2B/ANAPC11/PPP2CA/CCNB2/RBX1/ANAPC2/YWHAQ/CPEB1/BTRC/PPP3CA/RPS6KA2/ANAPC10/SPDYA/CAMK2G/PRKACA/PPP2CB/ANAPC13/YWHAG/REC8/ADCY1/ANAPC7/MAPK3/CDC16/CCNE2/ITPR2/PPP3R2/PPP2R1A/CAMK2D/PPP3CC/RPS6KA3/PPP2R1B/FBXW11/CDC26/PTTG1/CALML3/STAG3/ESPL1/YWHAZ/SMC1A/PPP3R1/ANAPC1/CDK2/MAPK1/CCNE1/ANAPC5/SLK/PPP2R5B/AURKA/CHP2/PPP2R5C/CDC23/PRKACB…
KEGG_COLORECTAL_CANCER	KEGG_COLORECTAL_CANCER	KEGG_COLORECTAL_CANCER	62	0.345049945607158	1.67043203847828	0.00205958628663129	0.0113215042888714	0.00814353817269699	7026	tags=56%, list=33%, signal=38%	ARAF/MAP2K1/AKT1/RAC3/PIK3R5/AXIN1/AKT3/PIK3CB/PIK3CA/BAX/MAPK8/APPL1/MAPK9/BAD/PIK3R2/MLH1/AXIN2/MAPK3/GSK3B/CYCS/KRAS/PIK3R3/RAC1/MSH2/APC/BIRC5/CTNNB1/AKT2/TP53/RAF1/TGFB2/BRAF/SMAD4/RALGDS/MAPK1
KEGG_PYRUVATE_METABOLISM	KEGG_PYRUVATE_METABOLISM	KEGG_PYRUVATE_METABOLISM	40	0.395193186185993	1.77104805437563	0.00212221254013453	0.0113215042888714	0.00814353817269699	5703	tags=52%, list=27%, signal=39%	ACAT2/ACSS1/GLO1/ALDH7A1/ALDH3A2/GRHPR/PCK2/HAGH/ACACA/MDH1/MDH2/PC/HAGHL/ACYP2/DLD/ACAT1/ALDH9A1/DLAT/ME2/PKM/PDHB
KEGG_PYRIMIDINE_METABOLISM	KEGG_PYRIMIDINE_METABOLISM	KEGG_PYRIMIDINE_METABOLISM	92	0.312106912543458	1.59207053299215	0.00216440610994993	0.0113215042888714	0.00814353817269699	11052	tags=75%, list=52%, signal=36%	CANT1/CTPS2/ENTPD4/NME4/DPYS/POLR3A/POLR1D/ENTPD6/NME3/UPRT/POLR3H/POLD4/PRIM2/POLR1C/POLR2L/NT5C2/POLR3B/POLR2D/POLR2C/DCTD/POLD2/UMPS/POLR2F/TXNRD2/POLR2H/POLR3K/DHODH/POLR2E/NT5C1A/PNPT1/CMPK1/UCKL1/POLR2B/POLR2G/POLR2J/NT5C/POLE3/ITPA/POLA2/POLR2K/POLR3D/AK3/NME6/POLR3GL/UCK1/DTYMK/RRM2B/ENTPD3/PNP/POLR1A/NUDT2/POLE/NT5C1B/POLR2I/POLE4/CAD/NT5C3A/POLR2A/UPB1/POLE2/RRM1/POLR3F/ENTPD5/NME5/TK2/…
KEGG_PROGESTERONE_MEDIATED_OOCYTE_MATURATION	KEGG_PROGESTERONE_MEDIATED_OOCYTE_MATURATION	KEGG_PROGESTERONE_MEDIATED_OOCYTE_MATURATION	84	0.315061401640484	1.59041139976032	0.002201403611725	0.0113215042888714	0.00814353817269699	7184	tags=55%, list=34%, signal=36%	IGF1R/ARAF/MAP2K1/AKT1/PKMYT1/ADCY6/PIK3R5/RPS6KA1/ANAPC11/AKT3/CCNB2/PIK3CB/PIK3CA/ANAPC2/FZR1/MAPK8/CPEB1/MAPK9/PDE3B/RPS6KA2/ANAPC10/HSP90AA1/CCNA2/GNAI3/SPDYA/HSP90AB1/PRKACA/ANAPC13/PIK3R2/ADCY1/MAPK13/GNAI1/ANAPC7/MAPK3/CDC16/KRAS/PIK3R3/RPS6KA3/CDC26/AKT2/RAF1/ANAPC1/CDK2/BRAF/MAPK1/ANAPC5
KEGG_NUCLEOTIDE_EXCISION_REPAIR	KEGG_NUCLEOTIDE_EXCISION_REPAIR	KEGG_NUCLEOTIDE_EXCISION_REPAIR	44	0.374697356388129	1.70790918117702	0.00260785279595846	0.0130392639797923	0.0093791197047629	9873	tags=80%, list=46%, signal=43%	GTF2H5/ERCC2/POLD4/ERCC6/RBX1/RFC5/CCNH/CUL4A/ERCC5/GTF2H3/MNAT1/CDK7/RPA1/ERCC3/POLD2/RAD23B/DDB1/ERCC8/LIG1/POLE3/RPA2/RFC3/RPA4/GTF2H1/RFC1/ERCC1/RAD23A/XPA/RPA3/CUL4B/POLE/POLE4/PCNA/RFC4/POLE2
KEGG_OTHER_GLYCAN_DEGRADATION	KEGG_OTHER_GLYCAN_DEGRADATION	KEGG_OTHER_GLYCAN_DEGRADATION	16	0.512105478951372	1.80852252961141	0.00272912825580998	0.0132768401633999	0.0095500078368315	3126	tags=56%, list=15%, signal=48%	FUCA1/NEU1/AGA/HEXB/MAN2B2/NEU3/GBA/FUCA2/MAN2C1
KEGG_VIBRIO_CHOLERAE_INFECTION	KEGG_VIBRIO_CHOLERAE_INFECTION	KEGG_VIBRIO_CHOLERAE_INFECTION	52	0.356886966477426	1.67515724224503	0.00340916912233372	0.0157884760869457	0.0113566231502592	6509	tags=56%, list=31%, signal=39%	ATP6AP1/ATP6V1G1/KDELR3/ATP6V0B/SLC12A2/SEC61B/SEC61G/ATP6V1H/PDIA4/ARF1/ATP6V0A1/ATP6V1D/SEC61A1/ATP6V1E2/GNAS/KDELR2/ATP6V1A/TJP2/ATP6V0D1/PRKACA/ATP6V1F/ATP6V1B2/ATP6V0E1/TJP1/ATP6V0E2/ATP6V1B1/ATP6V0A2/ATP6V0C/KDELR1
KEGG_RIBOFLAVIN_METABOLISM	KEGG_RIBOFLAVIN_METABOLISM	KEGG_RIBOFLAVIN_METABOLISM	14	0.53623177662466	1.81836465085171	0.00342083648550491	0.0157884760869457	0.0113566231502592	6840	tags=79%, list=32%, signal=53%	MTMR2/ACP2/ACP6/ACP1/PHPT1/ENPP3/FLAD1/ENPP1/MTMR1/RFK/ACP5
KEGG_RIBOSOME	KEGG_RIBOSOME	KEGG_RIBOSOME	83	0.315724891132606	1.59069541328974	0.00353331985160324	0.0158999393322146	0.0114367984670315	13567	tags=92%, list=64%, signal=33%	MRPL13/RPL17/RPS27L/RPL7A/RPLP0/RPS2/RPL23/RPL3/RPS3/RPS19/RPL8/RPS9/RPL41/RPL18/RPS8/RPS6/RPS29/RPS15/RPS18/RPL38/RPL12/RPL26L1/RPS4Y1/RPS23/RPL22L1/RPL39/RPS28/RPL6/RPL10A/RPS12/RPS7/RPL13A/RPS25/RPL11/RPS24/RPL35/RPL19/RPS27A/RPL37A/RSL24D1/RPSA/RPL27A/RPS21/UBA52/RPL9/RPL35A/RPL23A/RPL5/RPL10/RPS17/RPL22/RPL36A/RPL30/RPL15/RPL36/RPL13/RPLP1/RPL7/RPL32/RPL29/RPS16/RPL27/RPL31/RPS27/FAU/RPS5/RP…
KEGG_PANCREATIC_CANCER	KEGG_PANCREATIC_CANCER	KEGG_PANCREATIC_CANCER	69	0.314093279554621	1.53840917571335	0.00583740084204028	0.0256276134528598	0.0184338973959167	8669	tags=62%, list=41%, signal=37%	ARAF/EGF/MAP2K1/AKT1/RAC3/PIK3R5/VEGFC/IKBKG/BCL2L1/AKT3/ERBB2/CDC42/PIK3CB/RALB/PIK3CA/STAT3/MAPK8/MAPK9/RAD51/BAD/RELA/PIK3R2/MAPK3/VEGFB/KRAS/PIK3R3/RAC1/CHUK/AKT2/TP53/RAF1/TGFB2/BRAF/SMAD4/RALGDS/MAPK1/RB1/VEGFA/MAPK10/IKBKB/CDK4/RALBP1/CASP9
KEGG_CHRONIC_MYELOID_LEUKEMIA	KEGG_CHRONIC_MYELOID_LEUKEMIA	KEGG_CHRONIC_MYELOID_LEUKEMIA	73	0.313201907568289	1.55004974462331	0.00613484409399461	0.0259920206607654	0.0186960148612523	9913	tags=66%, list=47%, signal=35%	ARAF/MAP2K1/AKT1/PIK3R5/IKBKG/HDAC2/CRK/BCL2L1/ABL1/AKT3/PIK3CB/PIK3CA/CTBP2/CDKN1B/BCR/BAD/RELA/PIK3R2/MAPK3/KRAS/GRB2/PIK3R3/MAP2K2/CHUK/HDAC1/SHC2/AKT2/TP53/CTBP1/RAF1/TGFB2/MDM2/BRAF/SOS2/SMAD4/MAPK1/CRKL/RB1/SOS1/NRAS/IKBKB/PTPN11/CDK4/NFKB1/STAT5B/CDK6/E2F1/HRAS
KEGG_LYSOSOME	KEGG_LYSOSOME	KEGG_LYSOSOME	120	0.27250945437092	1.43622420586451	0.00620920493562729	0.0259920206607654	0.0186960148612523	8996	tags=58%, list=42%, signal=34%	FUCA1/ATP6AP1/NEU1/NAGLU/AP1M2/AP1G1/ATP6V0B/ENTPD4/ACP2/ATP6V1H/AP1B1/AGA/PPT1/SCARB2/CLN5/CTSG/IGF2R/GALC/GAA/HEXB/ATP6V0A1/SGSH/GNPTG/SLC17A5/AP3S2/AP3B1/PLA2G15/SUMF1/AP3M1/GBA/AP3D1/CTNS/NAGPA/CLTC/ASAH1/ATP6V0D1/M6PR/GGA1/ABCA2/SMPD1/DNASE2/CLTA/CD164/GGA3/NPC1/MFSD8/IDUA/NAGA/CTSO/ATP6V0A2/GGA2/CLTB/ATP6V0C/GLB1/CTSV/ACP5/PSAPL1/HGSNAT/CLN3/GM2A/MCOLN1/HEXA/ARSG/TPP1/CTSD/ARSB/AP4E1/GUSB/A…
KEGG_AMINOACYL_TRNA_BIOSYNTHESIS	KEGG_AMINOACYL_TRNA_BIOSYNTHESIS	KEGG_AMINOACYL_TRNA_BIOSYNTHESIS	21	0.445210720185594	1.7159155007421	0.00649839041067578	0.02658432440731	0.0191220579070124	8186	tags=76%, list=38%, signal=47%	NARS2/EARS2/FARSB/RARS2/IARS2/DARS2/FARSA/AARS2/LARS2/CARS2/MTFMT/YARS2/SARS2/FARS2/HARS2/SEPSECS
KEGG_AMINO_SUGAR_AND_NUCLEOTIDE_SUGAR_METABOLISM	KEGG_AMINO_SUGAR_AND_NUCLEOTIDE_SUGAR_METABOLISM	KEGG_AMINO_SUGAR_AND_NUCLEOTIDE_SUGAR_METABOLISM	41	0.357349288702295	1.61029407343705	0.00886735972388423	0.0354694388955369	0.0255131051704739	11357	tags=80%, list=53%, signal=38%	PGM3/GFPT1/GNPNAT1/NANS/GNE/CMAS/HEXB/CYB5R1/GALT/PMM1/HK1/UGDH/NANP/UAP1/GMPPA/GNPDA1/GALE/FPGT/MPI/AMDHD2/GNPDA2/HK3/HEXA/GALK2/PGM2/NAGK/UGP2/GPI/UXS1/HK2/PMM2/GMDS/CYB5R3
KEGG_RNA_POLYMERASE	KEGG_RNA_POLYMERASE	KEGG_RNA_POLYMERASE	27	0.406666121263442	1.67287499276495	0.0101232622225091	0.0396127652185139	0.0284933925255977	9080	tags=78%, list=43%, signal=45%	POLR3A/POLR1D/POLR3H/POLR1C/POLR2L/POLR3B/POLR2D/POLR2C/POLR2F/POLR2H/POLR3K/POLR2E/POLR2B/POLR2G/POLR2J/POLR2K/POLR3D/POLR3GL/POLR1A/POLR2I/POLR2A
KEGG_VASOPRESSIN_REGULATED_WATER_REABSORPTION	KEGG_VASOPRESSIN_REGULATED_WATER_REABSORPTION	KEGG_VASOPRESSIN_REGULATED_WATER_REABSORPTION	44	0.345246126721773	1.57366743997825	0.010837840489727	0.041506623152146	0.0298556412147015	11732	tags=77%, list=55%, signal=35%	CREB3L4/AQP3/RAB5A/ADCY6/DYNLL2/CREB3/RAB11A/GNAS/DYNC1H1/RAB5C/DYNC1LI1/DYNC1LI2/CREB3L2/DCTN6/PRKACA/VAMP2/ARHGDIA/RAB5B/DCTN4/DYNC1I2/STX4/DCTN1/DCTN5/PRKACB/PRKX/RAB11B/DYNC2H1/DYNLL1/CREB1/NSF/DYNC2LI1/DCTN2/ADCY3/PRKACG
KEGG_ARGININE_AND_PROLINE_METABOLISM	KEGG_ARGININE_AND_PROLINE_METABOLISM	KEGG_ARGININE_AND_PROLINE_METABOLISM	49	0.330816859967145	1.53783378464993	0.0130585572548987	0.0488576345644405	0.0351432108270537	5126	tags=45%, list=24%, signal=34%	ARG2/SMS/GLUD1/GOT2/ALDH7A1/ALDH3A2/DAO/ASL/PYCR1/CKMT1A/GOT1/ALDH18A1/AOC1/AMD1/ALDH4A1/GLUD2/SAT2/GAMT/CKB/SAT1/ALDH9A1/MAOA
KEGG_GLYCINE_SERINE_AND_THREONINE_METABOLISM	KEGG_GLYCINE_SERINE_AND_THREONINE_METABOLISM	KEGG_GLYCINE_SERINE_AND_THREONINE_METABOLISM	31	0.382321642269199	1.61415436548564	0.0133001338536532	0.0488576345644405	0.0351432108270537	10740	tags=74%, list=50%, signal=37%	CBS/PSAT1/CHDH/GCAT/PHGDH/DAO/AOC2/PIPOX/CTH/ALAS2/GAMT/SRR/DLD/MAOA/PSPH/GNMT/GLDC/SHMT2/AMT/DMGDH/GLYCTK/SDS/GATM
KEGG_GLUTATHIONE_METABOLISM	KEGG_GLUTATHIONE_METABOLISM	KEGG_GLUTATHIONE_METABOLISM	47	0.339009703673853	1.56752360090195	0.0156264399886459	0.0562551839591251	0.0404642551284935	9028	tags=66%, list=42%, signal=38%	GSTZ1/SMS/GCLM/ANPEP/MGST2/GGT1/GSR/GCLC/GGCT/IDH1/PGD/GSTT1/TXNDC12/MGST3/GSTO2/GPX4/GSTA4/GSTT2/MGST1/GSS/IDH2/GGT7/GPX1/GPX5/SRM/OPLAH/ODC1/RRM2B/GPX7/GSTA1/G6PD
KEGG_ACUTE_MYELOID_LEUKEMIA	KEGG_ACUTE_MYELOID_LEUKEMIA	KEGG_ACUTE_MYELOID_LEUKEMIA	57	0.309010953303304	1.47882051323651	0.0230953655352044	0.0815130548301331	0.0586321973339554	10065	tags=67%, list=47%, signal=35%	ARAF/MAP2K1/MTOR/AKT1/PIK3R5/IKBKG/AKT3/PIK3CB/ZBTB16/PIK3CA/STAT3/JUP/BAD/RELA/PIK3R2/CEBPA/MAPK3/KRAS/GRB2/PIK3R3/MAP2K2/CHUK/AKT2/RAF1/PIM2/BRAF/SOS2/MAPK1/SOS1/NRAS/IKBKB/RPS6KB2/PPARD/NFKB1/STAT5B/HRAS/PIM1/RPS6KB1
KEGG_SELENOAMINO_ACID_METABOLISM	KEGG_SELENOAMINO_ACID_METABOLISM	KEGG_SELENOAMINO_ACID_METABOLISM	24	0.396270052412109	1.56780130460109	0.028391167192429	0.098277117204562	0.0706905579892464	11181	tags=83%, list=52%, signal=40%	CBS/AHCY/GGT1/CTH/SEPHS2/LCMT2/SCLY/MAT2B/LCMT1/GGT7/MAT2A/SEPHS1/HEMK1/TRMT11/AHCYL2/PAPSS1/METTL2B/AHCYL1/MARS2/METTL6
KEGG_BIOSYNTHESIS_OF_UNSATURATED_FATTY_ACIDS	KEGG_BIOSYNTHESIS_OF_UNSATURATED_FATTY_ACIDS	KEGG_BIOSYNTHESIS_OF_UNSATURATED_FATTY_ACIDS	19	0.423362772441104	1.57661175785576	0.0289389067524116	0.0982830795364921	0.0706948466841435	3987	tags=53%, list=19%, signal=43%	ELOVL5/FADS1/FADS2/ELOVL2/ACAA1/SCD/ACOX3/TECR/HADHA/YOD1
KEGG_SPHINGOLIPID_METABOLISM	KEGG_SPHINGOLIPID_METABOLISM	KEGG_SPHINGOLIPID_METABOLISM	33	0.352588036098159	1.51409421826099	0.0316004077471967	0.105334692490656	0.0757670595108226	5050	tags=45%, list=24%, signal=35%	NEU1/SGPL1/SGMS2/SPTLC2/GALC/SMPD3/NEU3/GBA/DEGS1/SGMS1/ASAH1/SPHK2/SMPD1/ENPP7/ACER3
KEGG_PHENYLALANINE_METABOLISM	KEGG_PHENYLALANINE_METABOLISM	KEGG_PHENYLALANINE_METABOLISM	16	0.456699494646999	1.61285391248406	0.0327510917030568	0.107185391028186	0.0770982637220284	1849	tags=38%, list=9%, signal=34%	GOT2/PRDX6/MIF/AOC2/ALDH1A3/GOT1
KEGG_BASE_EXCISION_REPAIR	KEGG_BASE_EXCISION_REPAIR	KEGG_BASE_EXCISION_REPAIR	32	0.353416423184115	1.5056755808488	0.0358239508700102	0.115148413510747	0.0828260518235199	10801	tags=81%, list=51%, signal=40%	LIG3/POLD4/NTHL1/POLB/HMGB1/POLD2/SMUG1/TDG/APEX2/PARP1/LIG1/MPG/POLE3/MUTYH/PARP3/PARP2/PARP4/POLL/UNG/POLE/POLE4/PCNA/POLE2/NEIL2/POLD1/APEX1
KEGG_GLIOMA	KEGG_GLIOMA	KEGG_GLIOMA	63	0.293821913992618	1.42439150698659	0.0420841683366733	0.132897373694758	0.0955928477453522	7748	tags=52%, list=36%, signal=33%	IGF1R/ARAF/EGF/MAP2K1/MTOR/AKT1/PDGFA/PIK3R5/CAMK2B/AKT3/PIK3CB/PIK3CA/CAMK2G/PIK3R2/MAPK3/KRAS/GRB2/PIK3R3/CAMK2D/PDGFB/MAP2K2/CALML3/SHC2/AKT2/TP53/RAF1/MDM2/BRAF/SOS2/MAPK1/RB1/SOS1/NRAS
