# Supplementary material for: Genes Associated with Bicalutamide and Zoladex Effects in Benign Prostatic Hyperplasia via Transcriptomic and Network Pharmacology Analyses
Source: Research Square preprint supplement (doi:10.21203/rs.3.rs-6957357/v1), 2025-07-14
Supplement: Supplementary file 3 [file 951fb253dd15dba3b2780fc8.docx]

| Name | Vender | Art.No.(article number) |
| --- | --- | --- |
| PBS phosphate buffer | biosharp | BL601A |
| Universal two-step method kit | Zhongshan Golden Bridge Biotechnology | PV-9000 |
| DAB color development kit | Zhongshan Golden Bridge Biotechnology | ZLI-9019 |
| **Citrate Antigen Retrieval Buffer** | Servicebio | G1210 |
| **Hematoxylin Differentiation Solution** | Servicebio | G1039 |
| **Hematoxylin Staining Solution** | Servicebio | G1004 |
| **Neutral Gum** | Sinopharm Chemical Reagent | 10004160 |
| **Anhydrous Ethanol** | Sichuan Xilong Science | CAS 64-17-5 |
| **Xylene** | Sichuan Xilong Science | CAS 1330-20-7 |

**The information of experimental reagents**
