# Supplementary material for: Genes Associated with Bicalutamide and Zoladex Effects in Benign Prostatic Hyperplasia via Transcriptomic and Network Pharmacology Analyses
Source: Research Square preprint supplement (doi:10.21203/rs.3.rs-6957357/v1), 2025-07-14
Supplement: Supplementary file 3 [file b1b91abfa59d076a49720b03.pdf]

# GeneMANIA report

Created on : 26 September 2024 14:41:12  
Last database update : 13 August 2021 00:00:00  
Application version : 3.6.0

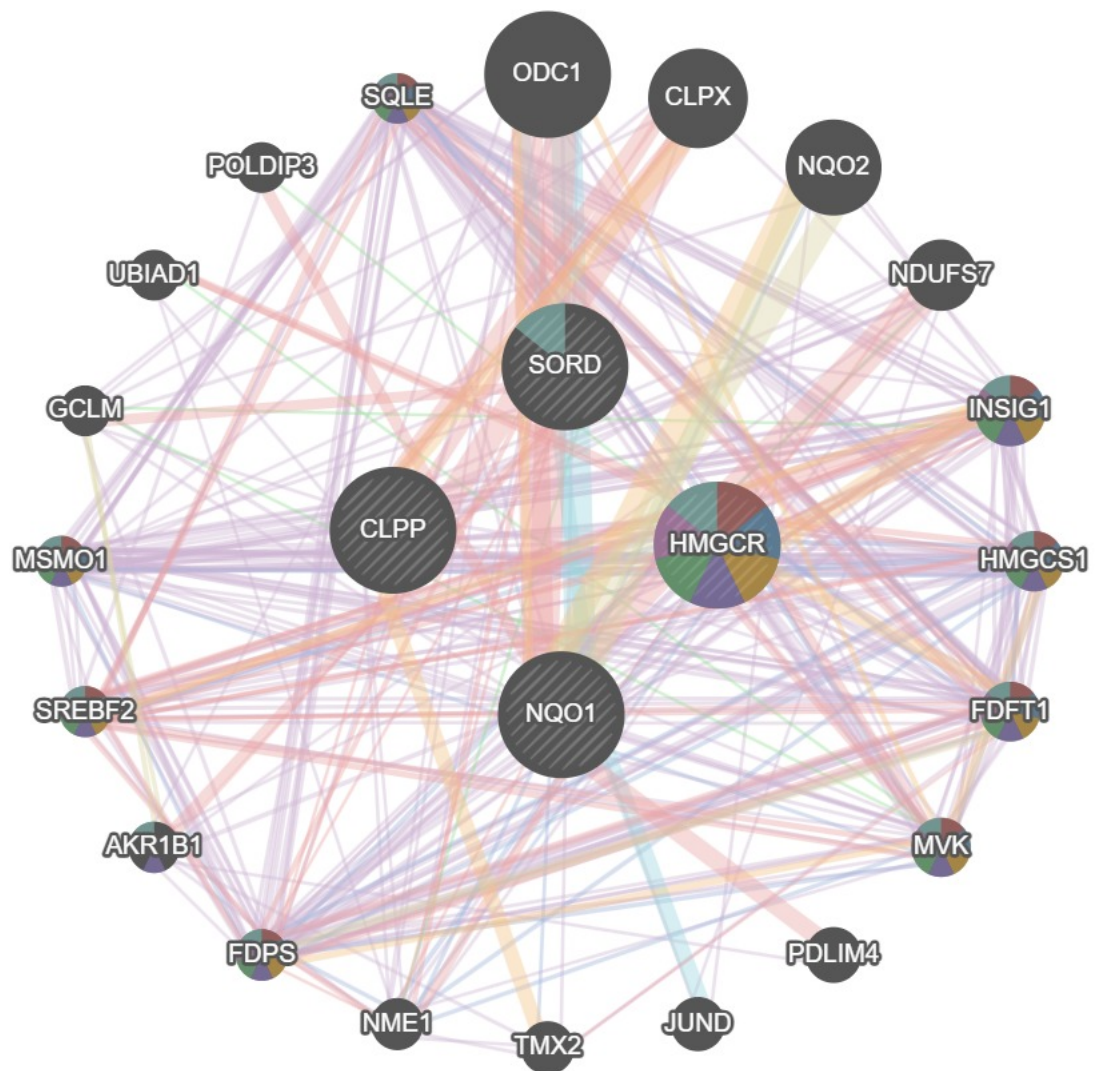

## Networks

- Physical Interactions
- Co-expression
- Predicted
- Co-localization
- Genetic Interactions
- Pathway
- Shared protein domains

## Functions

- sterol biosynthetic process
- secondary alcohol biosynthetic process
- cholesterol metabolic process
- steroid biosynthetic process
- sterol metabolic process
- secondary alcohol metabolic process
- alcohol metabolic process
