# Supplementary material for: Genes Associated with Bicalutamide and Zoladex Effects in Benign Prostatic Hyperplasia via Transcriptomic and Network Pharmacology Analyses
Source: Research Square preprint supplement (doi:10.21203/rs.3.rs-6957357/v1), 2025-07-14
Supplement: Supplementary file 5 [file f67cb27b7e833de16bad865d.xlsx]

## Sheet: GO
	ONTOLOGY	ID	Description	GeneRatio	BgRatio	pvalue	p.adjust	qvalue	geneID	Count	richFactor
GO:0019693	BP	GO:0019693	ribose phosphate metabolic process	32/174	475/18903	7.70738748925569e-19	2.90722656094725e-15	1.83354691849662e-15	HMGCR/PDE4B/INSR/HK1/APRT/SULT2B1/ACAT1/UMPS/PARP1/PDK1/ADK/PPCDC/HINT1/IMPDH2/HSPA8/NMNAT1/IMPDH1/PPARA/RFK/GMPR2/PNP/ATIC/GART/MTHFD1/PYGL/PDK2/TPI1/DHODH/RHOA/PAPSS1/GCDH/PKLR	32	0.0673684210526316
GO:0009259	BP	GO:0009259	ribonucleotide metabolic process	31/174	466/18903	4.1374941706227e-18	7.80331400579442e-15	4.92144043453016e-15	HMGCR/PDE4B/INSR/HK1/APRT/SULT2B1/ACAT1/UMPS/PARP1/PDK1/ADK/PPCDC/HINT1/IMPDH2/HSPA8/NMNAT1/IMPDH1/PPARA/RFK/GMPR2/PNP/ATIC/GART/MTHFD1/PDK2/TPI1/DHODH/RHOA/PAPSS1/GCDH/PKLR	31	0.0665236051502146
GO:0044282	BP	GO:0044282	small molecule catabolic process	27/174	385/18903	1.98054517255062e-16	2.49020546362031e-13	1.5705375754261e-13	SORD/ARG2/AKT1/AHCY/ADH5/BCAT2/GSTZ1/CRAT/CBS/HK1/ACAT1/HAGH/IMPA1/ACADM/GNPDA1/ALDH2/AKR1C3/PPARA/GALE/PNP/NQO2/TPI1/PPARD/SDS/OAT/GCDH/HADH	27	0.0701298701298701
GO:0006163	BP	GO:0006163	purine nucleotide metabolic process	29/174	476/18903	5.71826416150006e-16	5.39232310429456e-13	3.40086236973425e-13	HMGCR/PDE4B/INSR/HK1/APRT/SULT2B1/ACAT1/PARP1/PDK1/FHIT/ADK/PPCDC/HINT1/IMPDH2/HSPA8/NMNAT1/IMPDH1/PPARA/GMPR2/PNP/ATIC/GART/MTHFD1/PDK2/TPI1/RHOA/PAPSS1/GCDH/PKLR	29	0.0609243697478992
GO:0009150	BP	GO:0009150	purine ribonucleotide metabolic process	28/174	447/18903	9.4845857385572e-16	7.15517148116755e-13	4.5126660566609e-13	HMGCR/PDE4B/INSR/HK1/APRT/SULT2B1/ACAT1/PARP1/PDK1/ADK/PPCDC/HINT1/IMPDH2/HSPA8/NMNAT1/IMPDH1/PPARA/GMPR2/PNP/ATIC/GART/MTHFD1/PDK2/TPI1/RHOA/PAPSS1/GCDH/PKLR	28	0.0626398210290828
GO:0009165	BP	GO:0009165	nucleotide biosynthetic process	22/174	304/18903	7.84820061980274e-14	4.23046131549853e-11	2.66809247447304e-11	APRT/ACAT1/UMPS/PARP1/PDK1/ADK/PPCDC/IMPDH2/NMNAT1/IMPDH1/PPARA/RFK/PNP/ATIC/GART/MTHFD1/DTYMK/PDK2/DHODH/PAPSS1/GCDH/PKLR	22	0.0723684210526316
GO:0046390	BP	GO:0046390	ribose phosphate biosynthetic process	20/174	241/18903	8.76808931336204e-14	4.23046131549853e-11	2.66809247447304e-11	APRT/ACAT1/UMPS/PARP1/PDK1/ADK/PPCDC/IMPDH2/IMPDH1/PPARA/RFK/ATIC/GART/MTHFD1/PYGL/PDK2/DHODH/PAPSS1/GCDH/PKLR	20	0.0829875518672199
GO:1901293	BP	GO:1901293	nucleoside phosphate biosynthetic process	22/174	306/18903	8.97234637433411e-14	4.23046131549853e-11	2.66809247447304e-11	APRT/ACAT1/UMPS/PARP1/PDK1/ADK/PPCDC/IMPDH2/NMNAT1/IMPDH1/PPARA/RFK/PNP/ATIC/GART/MTHFD1/DTYMK/PDK2/DHODH/PAPSS1/GCDH/PKLR	22	0.0718954248366013
GO:0009260	BP	GO:0009260	ribonucleotide biosynthetic process	19/174	234/18903	5.59947685993442e-13	2.34680296840807e-10	1.48009563783062e-10	APRT/ACAT1/UMPS/PARP1/PDK1/ADK/PPCDC/IMPDH2/IMPDH1/PPARA/RFK/ATIC/GART/MTHFD1/PDK2/DHODH/PAPSS1/GCDH/PKLR	19	0.0811965811965812
GO:0009123	BP	GO:0009123	nucleoside monophosphate metabolic process	12/174	77/18903	5.52269633584535e-12	1.91418922422934e-09	1.20725223161197e-09	APRT/UMPS/ADK/IMPDH2/IMPDH1/RFK/GMPR2/PNP/ATIC/GART/DTYMK/DHODH	12	0.155844155844156
GO:0009161	BP	GO:0009161	ribonucleoside monophosphate metabolic process	11/174	59/18903	5.58220611519692e-12	1.91418922422934e-09	1.20725223161197e-09	APRT/UMPS/ADK/IMPDH2/IMPDH1/RFK/GMPR2/PNP/ATIC/GART/DHODH	11	0.186440677966102
GO:0009156	BP	GO:0009156	ribonucleoside monophosphate biosynthetic process	9/174	34/18903	1.65866116855068e-11	5.12981504758966e-09	3.23530222904299e-09	APRT/UMPS/ADK/IMPDH2/IMPDH1/RFK/ATIC/GART/DHODH	9	0.264705882352941
GO:0042180	BP	GO:0042180	cellular ketone metabolic process	17/174	218/18903	1.88642632798788e-11	5.12981504758966e-09	3.23530222904299e-09	GLO1/AKT1/FABP5/NQO1/CBR1/HAGH/PDK1/NR1H4/AKR1C3/PPARA/NQO2/HSD17B1/NR1H3/PDK2/TPI1/PPARD/FABP3	17	0.0779816513761468
GO:0072522	BP	GO:0072522	purine-containing compound biosynthetic process	18/174	251/18903	1.90396104629521e-11	5.12981504758966e-09	3.23530222904299e-09	APRT/ACAT1/PARP1/PDK1/ADK/PPCDC/IMPDH2/IMPDH1/PPARA/PNP/ATIC/GART/MTHFD1/PDK2/PAPSS1/MTAP/GCDH/PKLR	18	0.0717131474103586
GO:0032868	BP	GO:0032868	response to insulin	18/174	269/18903	5.99541244370798e-11	1.5076463825111e-08	9.50851377037196e-09	AKT1/INSR/KAT2B/APRT/IGF1R/PARP1/GRB2/NR1H4/GSK3B/PTPN1/PPARA/STAT1/PDK2/SRC/PDE3B/HADH/MAPK14/PKLR	18	0.0669144981412639
GO:0031667	BP	GO:0031667	response to nutrient levels	23/174	474/18903	7.81836594611058e-11	1.84317977179557e-08	1.16246756830328e-08	SORD/AKT1/NQO1/AHCY/CBS/ACAT1/IGF1R/ALAD/ACADM/MAPK8/MAPK1/NR1H4/RXRA/HSPA8/AKR1C3/PPARA/STAT1/PDK2/PPARD/SRC/ALB/MAPK14/PKLR	23	0.0485232067510548
GO:0046395	BP	GO:0046395	carboxylic acid catabolic process	17/174	243/18903	1.04825075783698e-10	2.32588344621241e-08	1.4669019892951e-08	SORD/ARG2/AKT1/AHCY/BCAT2/GSTZ1/CRAT/CBS/ACAT1/ACADM/GNPDA1/PPARA/PPARD/SDS/OAT/GCDH/HADH	17	0.0699588477366255
GO:0016054	BP	GO:0016054	organic acid catabolic process	17/174	247/18903	1.35320687294579e-10	2.83572018041751e-08	1.78844884962426e-08	SORD/ARG2/AKT1/AHCY/BCAT2/GSTZ1/CRAT/CBS/ACAT1/ACADM/GNPDA1/PPARA/PPARD/SDS/OAT/GCDH/HADH	17	0.0688259109311741
GO:0005996	BP	GO:0005996	monosaccharide metabolic process	17/174	248/18903	1.4413268855615e-10	2.86141316438842e-08	1.80465305339003e-08	SORD/AKT1/FABP5/INSR/KAT2B/HK1/ACADM/PDK1/PPARA/GALE/PDK2/TPI1/PPARD/SDS/SRC/GSTO1/MAPK14	17	0.0685483870967742
GO:0009124	BP	GO:0009124	nucleoside monophosphate biosynthetic process	9/174	43/18903	1.66115051181975e-10	3.13292986529205e-08	1.97589481932244e-08	APRT/UMPS/ADK/IMPDH2/IMPDH1/RFK/ATIC/GART/DHODH	9	0.209302325581395
GO:0009152	BP	GO:0009152	purine ribonucleotide biosynthetic process	16/174	220/18903	2.14745891198471e-10	3.78294133339165e-08	2.38584791356397e-08	APRT/ACAT1/PARP1/PDK1/ADK/PPCDC/IMPDH2/IMPDH1/PPARA/ATIC/GART/MTHFD1/PDK2/PAPSS1/GCDH/PKLR	16	0.0727272727272727
GO:0006006	BP	GO:0006006	glucose metabolic process	15/174	188/18903	2.20638147758792e-10	3.78294133339165e-08	2.38584791356397e-08	SORD/AKT1/FABP5/INSR/KAT2B/HK1/ACADM/PDK1/PPARA/PDK2/TPI1/PPARD/SDS/SRC/MAPK14	15	0.0797872340425532
GO:1901653	BP	GO:1901653	cellular response to peptide	20/174	373/18903	2.58591471798994e-10	4.24090013750351e-08	2.67467609274932e-08	AKT1/INSR/KAT2B/APRT/IGF1R/CSK/PARP1/MDM2/CCNA2/GRB2/NR1H4/GSK3B/PTPN1/STAT1/PDK2/PTK2/SRC/BACE1/PDE3B/PKLR	20	0.0536193029490617
GO:0043434	BP	GO:0043434	response to peptide hormone	21/174	421/18903	3.36305276074249e-10	5.28559792230027e-08	3.33355229792896e-08	AKT1/INSR/KAT2B/APRT/IGF1R/CSK/PARP1/CCNA2/GRB2/NR1H4/GSK3B/PTPN1/PPARA/STAT1/PDK2/PTK2/SRC/PDE3B/HADH/MAPK14/PKLR	21	0.0498812351543943
GO:0032496	BP	GO:0032496	response to lipopolysaccharide	19/174	339/18903	3.5485330979171e-10	5.35402673813732e-08	3.37670939001796e-08	AKT1/MIF/ADH5/PDE4B/ABL1/ALAD/MAPK8/MAPK1/NR1H4/CASP3/FGFR2/SELE/NR1H3/PPARD/RHOA/SRC/SELP/CTSG/MAPK14	19	0.056047197640118
GO:0019318	BP	GO:0019318	hexose metabolic process	16/174	229/18903	3.88390751010372e-10	5.63465351081201e-08	3.55369675013539e-08	SORD/AKT1/FABP5/INSR/KAT2B/HK1/ACADM/PDK1/PPARA/GALE/PDK2/TPI1/PPARD/SDS/SRC/MAPK14	16	0.0698689956331878
GO:0071375	BP	GO:0071375	cellular response to peptide hormone stimulus	18/174	306/18903	4.88969433511022e-10	6.83108408593916e-08	4.30826869292362e-08	AKT1/INSR/KAT2B/APRT/IGF1R/CSK/PARP1/CCNA2/GRB2/NR1H4/GSK3B/PTPN1/STAT1/PDK2/PTK2/SRC/PDE3B/PKLR	18	0.0588235294117647
GO:0009410	BP	GO:0009410	response to xenobiotic stimulus	21/174	432/18903	5.37142593666797e-10	7.23607808325414e-08	4.56369271310888e-08	SORD/NQO1/PDE4B/CBR1/ABL1/ALAD/UMPS/CYP2C9/CES2/CCNT1/PNP/STAT1/CASP3/TGFB2/PGF/RHOA/SRC/PMS2/GSTO1/HSP90AA1/HADH	21	0.0486111111111111
GO:0006164	BP	GO:0006164	purine nucleotide biosynthetic process	16/174	242/18903	8.72806646508344e-10	1.10178287626328e-07	6.94878969792661e-08	APRT/ACAT1/PARP1/PDK1/ADK/PPCDC/IMPDH2/IMPDH1/PPARA/ATIC/GART/MTHFD1/PDK2/PAPSS1/GCDH/PKLR	16	0.0661157024793388
GO:0006631	BP	GO:0006631	fatty acid metabolic process	20/174	400/18903	8.76285426508444e-10	1.10178287626328e-07	6.94878969792661e-08	AKT1/FABP5/MIF/ADH5/CRAT/CBR1/ACAT1/ACADM/CYP2C9/PDK1/CES2/AKR1C3/PPARA/NR1H3/PDK2/PPARD/FABP3/GCDH/HADH/MAPK14	20	0.05
GO:0032869	BP	GO:0032869	cellular response to insulin stimulus	15/174	208/18903	9.07353075341318e-10	1.10404380651208e-07	6.96304906713541e-08	AKT1/INSR/KAT2B/APRT/IGF1R/PARP1/GRB2/NR1H4/GSK3B/PTPN1/STAT1/PDK2/SRC/PDE3B/PKLR	15	0.0721153846153846
GO:0002237	BP	GO:0002237	response to molecule of bacterial origin	19/174	360/18903	9.70944334968284e-10	1.14450063484386e-07	7.2182045954879e-08	AKT1/MIF/ADH5/PDE4B/ABL1/ALAD/MAPK8/MAPK1/NR1H4/CASP3/FGFR2/SELE/NR1H3/PPARD/RHOA/SRC/SELP/CTSG/MAPK14	19	0.0527777777777778
GO:0006575	BP	GO:0006575	cellular modified amino acid metabolic process	14/174	180/18903	1.26027074604173e-09	1.4405276527483e-07	9.08520537816366e-08	GLO1/FOLH1/AHCY/GSTZ1/CRAT/HPN/GSTT2/HAGH/ACADM/GSR/ATIC/GART/MTHFD1/GSTO1	14	0.0777777777777778
GO:0006177	BP	GO:0006177	GMP biosynthetic process	6/174	14/18903	1.57617672712215e-09	1.74862900432492e-07	1.10283572857463e-07	APRT/ADK/IMPDH2/IMPDH1/ATIC/GART	6	0.428571428571429
GO:0062012	BP	GO:0062012	regulation of small molecule metabolic process	18/174	339/18903	2.50240247627184e-09	2.69687489728496e-07	1.70088108161635e-07	EPHX2/AKT1/FABP5/INSR/KAT2B/ACADM/PARP1/ME2/PDK1/NR1H4/SEC14L2/AKR1C3/PPARA/NR1H3/PDK2/PPARD/SRC/FABP3	18	0.0530973451327434
GO:0046777	BP	GO:0046777	protein autophosphorylation	15/174	226/18903	2.84842163950593e-09	2.98451289561566e-07	1.88229032318228e-07	AKT1/INSR/IGF1R/CSK/ABL1/GSK3B/ERBB4/PRKACA/CLK1/FGFR2/PTK2/SRC/EPHB4/KDR/EGFR	15	0.0663716814159292
GO:0046037	BP	GO:0046037	GMP metabolic process	7/174	27/18903	3.77207093077752e-09	3.84547339213319e-07	2.42528600385695e-07	APRT/ADK/IMPDH2/IMPDH1/GMPR2/ATIC/GART	7	0.259259259259259
GO:0009167	BP	GO:0009167	purine ribonucleoside monophosphate metabolic process	8/174	42/18903	3.96468204985997e-09	3.9354686031768e-07	2.48204471819489e-07	APRT/ADK/IMPDH2/IMPDH1/GMPR2/PNP/ATIC/GART	8	0.19047619047619
GO:0036293	BP	GO:0036293	response to decreased oxygen levels	17/174	309/18903	4.18128178312247e-09	4.04404997075332e-07	2.55052546015028e-07	DPP4/AKT1/AHCY/CBS/ALAD/MDM2/PDK1/CCNA2/PPARA/CASP3/TGFB2/PPARD/PGF/RHOA/SRC/PLAU/PKLR	17	0.0550161812297735
GO:0042060	BP	GO:0042060	wound healing	20/174	442/18903	4.85493760746075e-09	4.57820616383549e-07	2.88741026127929e-07	CLIC1/PPIA/GP1BA/PPARA/ANXA5/CASP3/FGFR2/TGFB2/PTK2/PPARD/RHOA/SRC/SELP/FGG/KDR/APCS/CTSG/PLAU/MMP12/MAPK14	20	0.0452488687782805
GO:0019395	BP	GO:0019395	fatty acid oxidation	11/174	110/18903	5.67356083611697e-09	5.21967596922762e-07	3.29197624894079e-07	AKT1/ADH5/CRAT/ACAT1/ACADM/PPARA/PPARD/FABP3/GCDH/HADH/MAPK14	11	0.1
GO:0009126	BP	GO:0009126	purine nucleoside monophosphate metabolic process	8/174	44/18903	5.86086705306612e-09	5.26361679146795e-07	3.31968910775174e-07	APRT/ADK/IMPDH2/IMPDH1/GMPR2/PNP/ATIC/GART	8	0.181818181818182
GO:0033674	BP	GO:0033674	positive regulation of kinase activity	21/174	496/18903	6.29868400759783e-09	5.52526420387419e-07	3.48470645218387e-07	AKT1/MAP2K1/MIF/CDC42/INSR/IGF1R/CSK/ABL1/PPIA/PTPN1/ERBB4/CCNT1/FGFR2/TGFB2/PTK2/RHOA/SRC/EPHB4/KDR/EGFR/HSP90AA1	21	0.0423387096774194
GO:0034440	BP	GO:0034440	lipid oxidation	11/174	116/18903	9.9743755353398e-09	8.55076011802312e-07	5.39284418896363e-07	AKT1/ADH5/CRAT/ACAT1/ACADM/PPARA/PPARD/FABP3/GCDH/HADH/MAPK14	11	0.0948275862068965
GO:0001890	BP	GO:0001890	placenta development	12/174	150/18903	1.45066793396217e-08	1.21598209931229e-06	7.66902814211582e-07	AKT1/ST14/MAP2K1/MME/PARP1/MAPK1/GRB2/FGFR2/PTK2/PPARD/EGFR/MAPK14	12	0.08
GO:0070482	BP	GO:0070482	response to oxygen levels	17/174	337/18903	1.51939622214737e-08	1.24590490216085e-06	7.857747052753e-07	DPP4/AKT1/AHCY/CBS/ALAD/MDM2/PDK1/CCNA2/PPARA/CASP3/TGFB2/PPARD/PGF/RHOA/SRC/PLAU/PKLR	17	0.0504451038575668
GO:0001666	BP	GO:0001666	response to hypoxia	16/174	296/18903	1.56730527179937e-08	1.24728565473899e-06	7.86645526513956e-07	DPP4/AHCY/CBS/ALAD/MDM2/PDK1/CCNA2/PPARA/CASP3/TGFB2/PPARD/PGF/RHOA/SRC/PLAU/PKLR	16	0.0540540540540541
GO:0006790	BP	GO:0006790	sulfur compound metabolic process	17/174	338/18903	1.58721398270072e-08	1.24728565473899e-06	7.86645526513956e-07	GLO1/AMD1/AHCY/GSTZ1/CBS/GSTT2/SULT2B1/ACAT1/HAGH/PDK1/GSR/MTHFD1/PDK2/PAPSS1/MTAP/GSTO1/GCDH	17	0.0502958579881657
GO:0009168	BP	GO:0009168	purine ribonucleoside monophosphate biosynthetic process	6/174	20/18903	1.94323289947545e-08	1.471467969881e-06	9.28034160833583e-07	APRT/ADK/IMPDH2/IMPDH1/ATIC/GART	6	0.3
GO:0007584	BP	GO:0007584	response to nutrient	12/174	154/18903	1.95051427608828e-08	1.471467969881e-06	9.28034160833583e-07	NQO1/AHCY/CBS/IGF1R/ALAD/NR1H4/RXRA/AKR1C3/STAT1/PDK2/PPARD/PKLR	12	0.0779220779220779
GO:0009112	BP	GO:0009112	nucleobase metabolic process	7/174	34/18903	2.16444194828912e-08	1.60083824096992e-06	1.00962617195736e-06	APRT/UMPS/MAPK1/ADK/GMPR2/GART/DHODH	7	0.205882352941176
GO:0019216	BP	GO:0019216	regulation of lipid metabolic process	17/174	347/18903	2.33511496746381e-08	1.69385647255259e-06	1.06829146284782e-06	EPHX2/AKT1/FABP5/CDC42/IGF1R/PDK1/NR1H4/SEC14L2/AKR1C3/PPARA/NR1H3/PDK2/PTK2/PPARD/SRC/FABP3/PDE3B	17	0.0489913544668588
GO:0038083	BP	GO:0038083	peptidyl-tyrosine autophosphorylation	6/174	21/18903	2.69982845710067e-08	1.92146281890259e-06	1.21183958551093e-06	INSR/IGF1R/ABL1/SRC/KDR/EGFR	6	0.285714285714286
GO:0050900	BP	GO:0050900	leukocyte migration	18/174	398/18903	3.01720084167084e-08	2.10757066199674e-06	1.32921518560937e-06	DPP4/AKT1/MIF/PDE4B/CDC42/ABL1/LGALS3/PPIA/MAPK1/GP1BA/TGFB2/SELE/PTK2/PGF/RHOA/SRC/SELP/CTSG	18	0.0452261306532663
GO:0009127	BP	GO:0009127	purine nucleoside monophosphate biosynthetic process	6/174	22/18903	3.68402476368024e-08	2.52657116520034e-06	1.59347291213729e-06	APRT/ADK/IMPDH2/IMPDH1/ATIC/GART	6	0.272727272727273
GO:0014068	BP	GO:0014068	positive regulation of phosphatidylinositol 3-kinase signaling	9/174	80/18903	5.10420474633014e-08	3.43804648270666e-06	2.16832758020792e-06	INSR/IGF1R/ERBB4/TGFB2/PTK2/PPARD/SRC/SELP/KDR	9	0.1125
GO:1901605	BP	GO:1901605	alpha-amino acid metabolic process	13/174	205/18903	5.77332984467978e-08	3.82052634633897e-06	2.40955225281187e-06	ARG2/AHCY/BCAT2/GSTZ1/CBS/ACAT1/NR1H4/GART/MTHFD1/SDS/OAT/MTAP/GCDH	13	0.0634146341463415
GO:0014066	BP	GO:0014066	regulation of phosphatidylinositol 3-kinase signaling	10/174	111/18903	7.79468182522069e-08	5.06923100771249e-06	3.19709272686003e-06	INSR/IGF1R/ERBB4/TGFB2/PTK2/PPARD/SRC/SELP/KDR/EGFR	10	0.0900900900900901
GO:0030258	BP	GO:0030258	lipid modification	13/174	213/18903	9.04482329751179e-08	5.72719193418886e-06	3.61205943273618e-06	EPHX2/AKT1/ADH5/CRAT/ACAT1/ACADM/PPARA/ABO/PPARD/FABP3/GCDH/HADH/MAPK14	13	0.0610328638497653
GO:0051604	BP	GO:0051604	protein maturation	16/174	336/18903	9.11006140114877e-08	5.72719193418886e-06	3.61205943273618e-06	DPP4/HPN/XIAP/KAT2B/MME/FKBP1A/PARP1/CASP7/PRKACA/GP1BA/CASP3/SRC/BACE1/FGG/CTSG/PLAU	16	0.0476190476190476
GO:0014065	BP	GO:0014065	phosphatidylinositol 3-kinase signaling	11/174	145/18903	1.01997637901233e-07	6.30713262563033e-06	3.97781987328363e-06	AKT1/INSR/IGF1R/ERBB4/TGFB2/PTK2/PPARD/SRC/SELP/KDR/EGFR	11	0.0758620689655172
GO:0022407	BP	GO:0022407	regulation of cell-cell adhesion	19/174	490/18903	1.38268738037613e-07	8.41209161093347e-06	5.30538791112062e-06	ARG2/DPP4/AKT1/CSK/ABL1/LGALS3/GP1BA/PPARA/PNP/CASP3/SELE/PTK2/RHOA/SRC/SELP/FGG/CD209/CTSG/MAPK14	19	0.0387755102040816
GO:0071216	BP	GO:0071216	cellular response to biotic stimulus	14/174	261/18903	1.4157728421136e-07	8.47665898484521e-06	5.3461096460764e-06	AKT1/MIF/PDE4B/ABL1/MAPK8/MAPK1/NR1H4/GSK3B/NR1H3/PPARD/RHOA/SRC/CTSG/MAPK14	14	0.053639846743295
GO:0071222	BP	GO:0071222	cellular response to lipopolysaccharide	13/174	222/18903	1.46446956457708e-07	8.63121749622614e-06	5.443587526224e-06	AKT1/MIF/PDE4B/ABL1/MAPK8/MAPK1/NR1H4/NR1H3/PPARD/RHOA/SRC/CTSG/MAPK14	13	0.0585585585585586
GO:0071900	BP	GO:0071900	regulation of protein serine/threonine kinase activity	17/174	395/18903	1.51572145832068e-07	8.79584821659321e-06	5.54741780697122e-06	AKT1/HMGCR/MAP2K1/MIF/INSR/CBS/KAT2B/CDK7/CSK/ABL1/CCNA2/PTPN1/CCNT1/CASP3/RHOA/SRC/EGFR	17	0.0430379746835443
GO:0043410	BP	GO:0043410	positive regulation of MAPK cascade	19/174	496/18903	1.66868862272708e-07	9.53680831049475e-06	6.01473092083444e-06	MAP2K1/MIF/CDC42/INSR/XIAP/IGF1R/CSK/ABL1/PPIA/PTPN1/ERBB4/MMP8/FGFR2/TGFB2/SRC/FGG/KDR/EGFR/AR	19	0.0383064516129032
GO:0009163	BP	GO:0009163	nucleoside biosynthetic process	5/174	15/18903	1.73875808096303e-07	9.64499335498902e-06	6.08296170739387e-06	APRT/ADK/PNP/DTYMK/MTAP	5	0.333333333333333
GO:0034404	BP	GO:0034404	nucleobase-containing small molecule biosynthetic process	5/174	15/18903	1.73875808096303e-07	9.64499335498902e-06	6.08296170739387e-06	APRT/ADK/PNP/DTYMK/MTAP	5	0.333333333333333
GO:0030522	BP	GO:0030522	intracellular receptor signaling pathway	14/174	266/18903	1.78666281902293e-07	9.76709007732537e-06	6.15996639358021e-06	FABP5/XIAP/PARP1/THRB/NR1H4/RXRA/AKR1C3/PPARA/RARB/NR1H3/PPARD/RHOA/SRC/AR	14	0.0526315789473684
GO:0071219	BP	GO:0071219	cellular response to molecule of bacterial origin	13/174	234/18903	2.68895421611739e-07	1.44896218617068e-05	9.1384007946245e-06	AKT1/MIF/PDE4B/ABL1/MAPK8/MAPK1/NR1H4/NR1H3/PPARD/RHOA/SRC/CTSG/MAPK14	13	0.0555555555555556
GO:1903037	BP	GO:1903037	regulation of leukocyte cell-cell adhesion	16/174	377/18903	4.31855451530147e-07	2.29430811714326e-05	1.44698787317736e-05	ARG2/DPP4/AKT1/CSK/ABL1/LGALS3/GP1BA/PPARA/PNP/CASP3/SELE/RHOA/SRC/SELP/CD209/CTSG	16	0.0424403183023873
GO:0018108	BP	GO:0018108	peptidyl-tyrosine phosphorylation	16/174	380/18903	4.79925126400006e-07	2.50880889200112e-05	1.5822704961552e-05	MAP2K1/MIF/INSR/IGF1R/TNK2/CSK/ABL1/PTPN1/ERBB4/CLK1/FGFR2/PTK2/SRC/EPHB4/KDR/EGFR	16	0.0421052631578947
GO:0006635	BP	GO:0006635	fatty acid beta-oxidation	8/174	76/18903	4.85533004019305e-07	2.50880889200112e-05	1.5822704961552e-05	AKT1/CRAT/ACAT1/ACADM/PPARA/PPARD/GCDH/HADH	8	0.105263157894737
GO:0018212	BP	GO:0018212	peptidyl-tyrosine modification	16/174	382/18903	5.14610994361527e-07	2.62312523071849e-05	1.65436820377959e-05	MAP2K1/MIF/INSR/IGF1R/TNK2/CSK/ABL1/PTPN1/ERBB4/CLK1/FGFR2/PTK2/SRC/EPHB4/KDR/EGFR	16	0.0418848167539267
GO:0010565	BP	GO:0010565	regulation of cellular ketone metabolic process	10/174	136/18903	5.27605000006784e-07	2.65350141336745e-05	1.67352603510924e-05	AKT1/FABP5/PDK1/NR1H4/AKR1C3/PPARA/NR1H3/PDK2/PPARD/FABP3	10	0.0735294117647059
GO:0045785	BP	GO:0045785	positive regulation of cell adhesion	18/174	484/18903	5.53333152339404e-07	2.74627980345294e-05	1.73204006133941e-05	DPP4/AKT1/CDC42/CSK/ABL1/GSK3B/GP1BA/CDK6/PNP/TGFB2/SELE/RHOA/SRC/SELP/FGG/CD209/KDR/CTSG	18	0.0371900826446281
GO:0006979	BP	GO:0006979	response to oxidative stress	17/174	434/18903	5.68841312782377e-07	2.76581661585379e-05	1.74436165424724e-05	AKT1/NQO1/ABL1/ALAD/PPIA/PARP1/MAPK8/MAPK1/PDK1/ATOX1/GSR/AKR1C3/STAT1/CASP3/PDK2/SRC/EGFR	17	0.0391705069124424
GO:0016485	BP	GO:0016485	protein processing	13/174	250/18903	5.71934506989914e-07	2.76581661585379e-05	1.74436165424724e-05	DPP4/HPN/XIAP/MME/PARP1/CASP7/PRKACA/CASP3/SRC/BACE1/FGG/CTSG/PLAU	13	0.052
GO:0048545	BP	GO:0048545	response to steroid hormone	15/174	339/18903	5.96257643245121e-07	2.84694155736784e-05	1.79552601430243e-05	EIF4E/IGF1R/ALAD/PARP1/RXRA/HSPA8/AKR1C3/PPARA/CASP3/TGFB2/NR1H3/PPARD/RHOA/SRC/AR	15	0.0442477876106195
GO:0032102	BP	GO:0032102	negative regulation of response to external stimulus	17/174	436/18903	6.06277598205483e-07	2.85859887553885e-05	1.80287812097946e-05	ARG2/DPP4/MIF/PARP1/NR1H4/GP1BA/PPARA/NR1H3/PPARD/SRC/BACE1/FGG/APCS/PLAU/MMP12/MAPK14/RTN4R	17	0.0389908256880734
GO:0044262	BP	GO:0044262	cellular carbohydrate metabolic process	14/174	296/18903	6.51169352822457e-07	3.00592356577219e-05	1.89579373183155e-05	SORD/AKT1/INSR/KAT2B/HK1/IMPA1/ACADM/PDK1/GSK3B/PPARA/PYGL/PDK2/TPI1/SRC	14	0.0472972972972973
GO:1901659	BP	GO:1901659	glycosyl compound biosynthetic process	5/174	19/18903	6.53461644733086e-07	3.00592356577219e-05	1.89579373183155e-05	APRT/ADK/PNP/DTYMK/MTAP	5	0.263157894736842
GO:0006090	BP	GO:0006090	pyruvate metabolic process	9/174	108/18903	6.90725565610782e-07	3.10168670652842e-05	1.95619019834633e-05	INSR/HK1/ME2/PDK1/PPARA/PDK2/TPI1/SDS/PKLR	9	0.0833333333333333
GO:0090398	BP	GO:0090398	cellular senescence	9/174	108/18903	6.90725565610782e-07	3.10168670652842e-05	1.95619019834633e-05	ARG2/MAP2K1/MIF/IGF1R/ABL1/MAPK8/CDK6/CDK2/MAPK14	9	0.0833333333333333
GO:0009116	BP	GO:0009116	nucleoside metabolic process	7/174	56/18903	7.87008489444729e-07	3.49246590845355e-05	2.2026491469289e-05	AHCY/APRT/ADK/PNP/ATIC/DTYMK/MTAP	7	0.125
GO:1901657	BP	GO:1901657	glycosyl compound metabolic process	8/174	81/18903	7.96504421310756e-07	3.49350543858625e-05	2.20330476396855e-05	AHCY/APRT/ADK/AKR1C3/PNP/ATIC/DTYMK/MTAP	8	0.0987654320987654
GO:0048015	BP	GO:0048015	phosphatidylinositol-mediated signaling	11/174	178/18903	8.06348586044062e-07	3.49603088110138e-05	2.20489752505696e-05	AKT1/INSR/IGF1R/ERBB4/TGFB2/PTK2/PPARD/SRC/SELP/KDR/EGFR	11	0.0617977528089888
GO:0048017	BP	GO:0048017	inositol lipid-mediated signaling	11/174	182/18903	1.00460204432902e-06	4.30608967182846e-05	2.71579021553059e-05	AKT1/INSR/IGF1R/ERBB4/TGFB2/PTK2/PPARD/SRC/SELP/KDR/EGFR	11	0.0604395604395604
GO:0009141	BP	GO:0009141	nucleoside triphosphate metabolic process	13/174	267/18903	1.19947565833298e-06	5.08362043059774e-05	3.20616793356892e-05	INSR/HK1/PARP1/ADK/IMPDH2/HSPA8/NMNAT1/IMPDH1/PPARA/DTYMK/TPI1/RHOA/PKLR	13	0.048689138576779
GO:0018105	BP	GO:0018105	peptidyl-serine phosphorylation	14/174	313/18903	1.26464042402595e-06	5.2097845792895e-05	3.28573788837257e-05	AKT1/MIF/CSNK2A1/MAPK8/MAPK1/GSK3B/PRKACA/CLK1/CSNK1G2/SRC/EGFR/CDK2/HSP90AA1/MAPK14	14	0.0447284345047923
GO:0010038	BP	GO:0010038	response to metal ion	15/174	360/18903	1.26612366496089e-06	5.2097845792895e-05	3.28573788837257e-05	SORD/AKT1/NQO1/ALAD/PARP1/MAPK8/MAPK1/AKR1C3/CASP3/HSD17B1/BACE1/FGG/EGFR/PPP5C/PKLR	15	0.0416666666666667
GO:0046686	BP	GO:0046686	response to cadmium ion	7/174	60/18903	1.27067916568037e-06	5.2097845792895e-05	3.28573788837257e-05	SORD/AKT1/ALAD/MAPK8/MAPK1/AKR1C3/EGFR	7	0.116666666666667
GO:0045787	BP	GO:0045787	positive regulation of cell cycle	15/174	362/18903	1.35635808920396e-06	5.50127173384659e-05	3.46957473865415e-05	AKT1/RAB11A/CDC42/INSR/EIF4E/KAT2B/IGF1R/ABL1/MDM2/CCNT1/FGFR2/TGFB2/RHOA/SRC/EGFR	15	0.0414364640883978
GO:0097242	BP	GO:0097242	amyloid-beta clearance	6/174	39/18903	1.41500557165e-06	5.67808618751466e-05	3.58108912869988e-05	HMGCR/RAB11A/INSR/MME/IGF1R/RAB5A	6	0.153846153846154
GO:0046128	BP	GO:0046128	purine ribonucleoside metabolic process	5/174	22/18903	1.44714251241409e-06	5.71694350753586e-05	3.60559589413156e-05	AHCY/APRT/ADK/PNP/MTAP	5	0.227272727272727
GO:0071241	BP	GO:0071241	cellular response to inorganic substance	12/174	229/18903	1.45500152895929e-06	5.71694350753586e-05	3.60559589413156e-05	AKT1/NQO1/ALAD/PARP1/MAPK8/MAPK1/CCNA2/AKR1C3/HSD17B1/BACE1/EGFR/CDK2	12	0.0524017467248908
GO:0007159	BP	GO:0007159	leukocyte cell-cell adhesion	16/174	414/18903	1.48162406860053e-06	5.76153194511463e-05	3.63371719483147e-05	ARG2/DPP4/AKT1/CSK/ABL1/LGALS3/GP1BA/PPARA/PNP/CASP3/SELE/RHOA/SRC/SELP/CD209/CTSG	16	0.0386473429951691
GO:0002685	BP	GO:0002685	regulation of leukocyte migration	12/174	231/18903	1.59370224410891e-06	6.1341274130396e-05	3.86870791803022e-05	DPP4/AKT1/MIF/ABL1/LGALS3/MAPK1/GP1BA/SELE/PTK2/PGF/RHOA/SELP	12	0.051948051948052
GO:0045834	BP	GO:0045834	positive regulation of lipid metabolic process	10/174	154/18903	1.65182834946105e-06	6.27203341108723e-05	3.95568329214074e-05	AKT1/CDC42/IGF1R/NR1H4/PPARA/NR1H3/PTK2/PPARD/SRC/FABP3	10	0.0649350649350649
GO:0070997	BP	GO:0070997	neuron death	15/174	368/18903	1.66278722457244e-06	6.27203341108723e-05	3.95568329214074e-05	AKT1/NQO1/XIAP/ABL1/PARP1/THRB/CASP7/GSK3B/NMNAT1/PPARA/CASP3/TGFB2/RHOA/BACE1/KDR	15	0.0407608695652174
GO:2001234	BP	GO:2001234	negative regulation of apoptotic signaling pathway	12/174	233/18903	1.74397733112917e-06	6.47845623397709e-05	4.08587126438249e-05	AKT1/MIF/LGALS3/PPIA/CSNK2A1/MDM2/CTNNA1/GSK3B/PTPN1/SRC/FGG/AR	12	0.0515021459227468
GO:0016052	BP	GO:0016052	carbohydrate catabolic process	10/174	155/18903	1.75186250229497e-06	6.47845623397709e-05	4.08587126438249e-05	SORD/INSR/HK1/HEXB/PPARA/GALE/PYGL/GM2A/TPI1/PKLR	10	0.0645161290322581
GO:0045860	BP	GO:0045860	positive regulation of protein kinase activity	16/174	420/18903	1.78579459408008e-06	6.53982253288357e-05	4.12457412633724e-05	AKT1/MAP2K1/MIF/INSR/CSK/ABL1/PPIA/PTPN1/ERBB4/CCNT1/TGFB2/PTK2/RHOA/SRC/EGFR/HSP90AA1	16	0.0380952380952381
GO:0008286	BP	GO:0008286	insulin receptor signaling pathway	9/174	122/18903	1.9294331213607e-06	6.99279305053719e-05	4.41025626338507e-05	AKT1/INSR/IGF1R/GRB2/NR1H4/GSK3B/PTPN1/PDK2/SRC	9	0.0737704918032787
GO:1901216	BP	GO:1901216	positive regulation of neuron death	8/174	91/18903	1.9465622224454e-06	6.99279305053719e-05	4.41025626338507e-05	NQO1/ABL1/PARP1/GSK3B/CASP3/TGFB2/RHOA/BACE1	8	0.0879120879120879
GO:0046394	BP	GO:0046394	carboxylic acid biosynthetic process	14/174	326/18903	2.04012714622476e-06	7.25977320335829e-05	4.5786368922224e-05	FABP5/MIF/BCAT2/CBS/CBR1/CYP2C9/NR1H4/AKR1C3/MTHFD1/NR1H3/SDS/OAT/MTAP/PKLR	14	0.0429447852760736
GO:0042451	BP	GO:0042451	purine nucleoside biosynthetic process	4/174	11/18903	2.17625638200507e-06	7.51404021677448e-05	4.73899952277455e-05	APRT/ADK/PNP/MTAP	4	0.363636363636364
GO:0042455	BP	GO:0042455	ribonucleoside biosynthetic process	4/174	11/18903	2.17625638200507e-06	7.51404021677448e-05	4.73899952277455e-05	APRT/ADK/PNP/MTAP	4	0.363636363636364
GO:0046129	BP	GO:0046129	purine ribonucleoside biosynthetic process	4/174	11/18903	2.17625638200507e-06	7.51404021677448e-05	4.73899952277455e-05	APRT/ADK/PNP/MTAP	4	0.363636363636364
GO:0016053	BP	GO:0016053	organic acid biosynthetic process	14/174	328/18903	2.1912630536723e-06	7.51404021677448e-05	4.73899952277455e-05	FABP5/MIF/BCAT2/CBS/CBR1/CYP2C9/NR1H4/AKR1C3/MTHFD1/NR1H3/SDS/OAT/MTAP/PKLR	14	0.0426829268292683
GO:0001952	BP	GO:0001952	regulation of cell-matrix adhesion	9/174	125/18903	2.3624933921099e-06	8.02822078832301e-05	5.06328598024502e-05	ABL1/GSK3B/CDK6/PTK2/RHOA/SRC/KDR/PLAU/MMP12	9	0.072
GO:0018209	BP	GO:0018209	peptidyl-serine modification	14/174	332/18903	2.52386295185468e-06	8.42630334579584e-05	5.31435105249166e-05	AKT1/MIF/CSNK2A1/MAPK8/MAPK1/GSK3B/PRKACA/CLK1/CSNK1G2/SRC/EGFR/CDK2/HSP90AA1/MAPK14	14	0.0421686746987952
GO:0072329	BP	GO:0072329	monocarboxylic acid catabolic process	9/174	126/18903	2.52431674993354e-06	8.42630334579584e-05	5.31435105249166e-05	SORD/AKT1/CRAT/ACAT1/ACADM/PPARA/PPARD/GCDH/HADH	9	0.0714285714285714
GO:1901606	BP	GO:1901606	alpha-amino acid catabolic process	8/174	95/18903	2.69849297072071e-06	8.92869779434957e-05	5.63120416789363e-05	ARG2/AHCY/BCAT2/GSTZ1/CBS/ACAT1/SDS/OAT	8	0.0842105263157895
GO:0034599	BP	GO:0034599	cellular response to oxidative stress	13/174	288/18903	2.77641954951281e-06	9.10665612240203e-05	5.74343998343154e-05	AKT1/NQO1/ABL1/PPIA/PARP1/MAPK8/MAPK1/PDK1/GSR/AKR1C3/PDK2/SRC/EGFR	13	0.0451388888888889
GO:0006520	BP	GO:0006520	cellular amino acid metabolic process	13/174	289/18903	2.88417520055917e-06	9.37854211768033e-05	5.91491465813405e-05	ARG2/AHCY/BCAT2/GSTZ1/CBS/ACAT1/NR1H4/GART/MTHFD1/SDS/OAT/MTAP/GCDH	13	0.0449826989619377
GO:0019217	BP	GO:0019217	regulation of fatty acid metabolic process	8/174	96/18903	2.92093618348226e-06	9.41689853341461e-05	5.93910551027433e-05	AKT1/FABP5/PDK1/PPARA/NR1H3/PDK2/PPARD/FABP3	8	0.0833333333333333
GO:0000302	BP	GO:0000302	response to reactive oxygen species	11/174	204/18903	3.06304885323273e-06	9.79137311389311e-05	6.17528136334164e-05	AKT1/NQO1/ABL1/MAPK8/MAPK1/AKR1C3/STAT1/CASP3/PDK2/SRC/EGFR	11	0.053921568627451
GO:0009144	BP	GO:0009144	purine nucleoside triphosphate metabolic process	12/174	247/18903	3.19576720022873e-06	0.000100938644456111	6.36605839344789e-05	INSR/HK1/PARP1/ADK/IMPDH2/HSPA8/NMNAT1/IMPDH1/PPARA/TPI1/RHOA/PKLR	12	0.048582995951417
GO:1901654	BP	GO:1901654	response to ketone	11/174	205/18903	3.21119759669495e-06	0.000100938644456111	6.36605839344789e-05	AKT1/NQO1/EIF4E/IGF1R/PARP1/AKR1C3/TGFB2/NR1H3/SRC/MTAP/AR	11	0.0536585365853659
GO:0048732	BP	GO:0048732	gland development	16/174	441/18903	3.34455009389911e-06	0.000104261512018078	6.5756269788708e-05	AKT1/MAP2K1/INSR/HPN/APRT/ACAT1/ABL1/UMPS/ACADM/MAPK1/ERBB4/FGFR2/TGFB2/SRC/EGFR/AR	16	0.036281179138322
GO:0050878	BP	GO:0050878	regulation of body fluid levels	15/174	390/18903	3.39019051359153e-06	0.00010481802145301	6.61072524652015e-05	CLIC1/APRT/UMPS/PPIA/ERBB4/PRKACA/GP1BA/ANXA5/NR1H3/SRC/SELP/FGG/CTSG/PLAU/MAPK14	15	0.0384615384615385
GO:0006081	BP	GO:0006081	cellular aldehyde metabolic process	7/174	70/18903	3.65088886447878e-06	0.000111960591844016	7.06119711914596e-05	GLO1/ADH5/HAGH/PNPO/ALDH2/AKR1C3/TPI1	7	0.1
GO:0071383	BP	GO:0071383	cellular response to steroid hormone stimulus	11/174	209/18903	3.86844826363265e-06	0.000117675700406632	7.42164098116281e-05	EIF4E/IGF1R/PARP1/RXRA/HSPA8/AKR1C3/PPARA/PPARD/RHOA/SRC/AR	11	0.0526315789473684
GO:0062197	BP	GO:0062197	cellular response to chemical stress	14/174	345/18903	3.93814406459287e-06	0.000118837435293155	7.49490996714097e-05	AKT1/NQO1/ABL1/PPIA/PARP1/MAPK8/MAPK1/PDK1/GSR/AKR1C3/CASP3/PDK2/SRC/EGFR	14	0.0405797101449275
GO:0097193	BP	GO:0097193	intrinsic apoptotic signaling pathway	13/174	298/18903	4.03400198886665e-06	0.000120763932555595	7.61641144096794e-05	AKT1/MIF/ABL1/PPIA/PARP1/MDM2/PDK1/FHIT/PTPN1/HINT1/CASP3/PDK2/SRC	13	0.0436241610738255
GO:0042278	BP	GO:0042278	purine nucleoside metabolic process	5/174	27/18903	4.27405249336314e-06	0.000126170512243334	7.95739682061548e-05	AHCY/APRT/ADK/PNP/MTAP	5	0.185185185185185
GO:0009062	BP	GO:0009062	fatty acid catabolic process	8/174	101/18903	4.28150200613647e-06	0.000126170512243334	7.95739682061548e-05	AKT1/CRAT/ACAT1/ACADM/PPARA/PPARD/GCDH/HADH	8	0.0792079207920792
GO:0060711	BP	GO:0060711	labyrinthine layer development	6/174	47/18903	4.38163194238764e-06	0.000128104078880801	8.07934414998632e-05	AKT1/ST14/MAP2K1/MAPK1/GRB2/FGFR2	6	0.127659574468085
GO:0016051	BP	GO:0016051	carbohydrate biosynthetic process	11/174	212/18903	4.43587808643219e-06	0.000128104078880801	8.07934414998632e-05	SORD/AKT1/INSR/KAT2B/IMPA1/ACADM/GSK3B/PPARA/PDK2/TPI1/SDS	11	0.0518867924528302
GO:1903829	BP	GO:1903829	positive regulation of protein localization	16/174	451/18903	4.4490016790522e-06	0.000128104078880801	8.07934414998632e-05	AKT1/LGALS3/PPIA/PARP1/MAPK8/NR1H4/GSK3B/ERBB4/PRKACA/TGFB2/PPARD/SRC/FGG/EGFR/HSP90AA1/MAPK14	16	0.0354767184035477
GO:0048511	BP	GO:0048511	rhythmic process	13/174	302/18903	4.66397232871149e-06	0.000133276542605301	8.40556416498243e-05	AHCY/KAT2B/IGF1R/CSNK2A1/PARP1/MAPK8/GSK3B/IMPDH2/PPARA/CASP3/TGFB2/NR1H3/SRC	13	0.043046357615894
GO:1901136	BP	GO:1901136	carbohydrate derivative catabolic process	10/174	176/18903	5.48256270152368e-06	0.000155490424888326	9.80656248946855e-05	AHCY/PDE4B/ACAT1/HEXB/HINT1/GNPDA1/MAN1B1/PNP/GM2A/MMP12	10	0.0568181818181818
GO:0044403	BP	GO:0044403	biological process involved in symbiotic interaction	13/174	307/18903	5.57293406478244e-06	0.000156873935017607	9.89381852820763e-05	DPP4/CDC42/INSR/HPN/PPIA/RAB5A/HSPA8/CCNT1/SRC/CD209/EGFR/APCS/CTSG	13	0.0423452768729642
GO:0045927	BP	GO:0045927	positive regulation of growth	12/174	261/18903	5.62424674402108e-06	0.000157145620136648	9.91095332669601e-05	AKT1/CDC42/INSR/HPN/CSNK2A1/ERBB4/FGFR2/TGFB2/PPARD/RHOA/EGFR/MAPK14	12	0.0459770114942529
GO:0007162	BP	GO:0007162	negative regulation of cell adhesion	13/174	308/18903	5.77245904295909e-06	0.000160100849338542	0.000100973354776219	ARG2/AKT1/ABL1/LGALS3/PPARA/CASP3/PTK2/RHOA/SRC/FGG/PDE3B/CTSG/MMP12	13	0.0422077922077922
GO:0002066	BP	GO:0002066	columnar/cuboidal epithelial cell development	6/174	50/18903	6.3380631477893e-06	0.000174053931928189	0.000109773367795308	AKT1/GSK3B/CDK6/RHEB/RARB/SRC	6	0.12
GO:0006167	BP	GO:0006167	AMP biosynthetic process	4/174	14/18903	6.46011412246726e-06	0.000174053931928189	0.000109773367795308	APRT/ADK/ATIC/GART	4	0.285714285714286
GO:0043101	BP	GO:0043101	purine-containing compound salvage	4/174	14/18903	6.46011412246726e-06	0.000174053931928189	0.000109773367795308	APRT/ADK/PNP/MTAP	4	0.285714285714286
GO:0071871	BP	GO:0071871	response to epinephrine	4/174	14/18903	6.46011412246726e-06	0.000174053931928189	0.000109773367795308	PDE4B/ABL1/PRKACA/PKLR	4	0.285714285714286
GO:0010906	BP	GO:0010906	regulation of glucose metabolic process	8/174	107/18903	6.58983815935178e-06	0.000176289854872872	0.000111183532961068	AKT1/INSR/KAT2B/ACADM/PDK1/PPARA/PDK2/SRC	8	0.0747663551401869
GO:0010810	BP	GO:0010810	regulation of cell-substrate adhesion	11/174	222/18903	6.88704169200291e-06	0.000181663785050594	0.000114572795170604	CDC42/ABL1/GSK3B/CDK6/PTK2/RHOA/SRC/FGG/KDR/PLAU/MMP12	11	0.0495495495495495
GO:0044242	BP	GO:0044242	cellular lipid catabolic process	11/174	222/18903	6.88704169200291e-06	0.000181663785050594	0.000114572795170604	AKT1/CRAT/ACAT1/ACADM/HEXB/AKR1C3/PPARA/GM2A/PPARD/GCDH/HADH	11	0.0495495495495495
GO:0006066	BP	GO:0006066	alcohol metabolic process	14/174	367/18903	7.983325345435e-06	0.000209118772242922	0.000131888269595637	EPHX2/SORD/HMGCR/ADH5/SULT2B1/FDPS/IMPA1/CYP2C9/NR1H4/ALDH2/SEC14L2/AKR1C3/TPI1/PPARD	14	0.0381471389645777
GO:0016032	BP	GO:0016032	viral process	15/174	421/18903	8.51435949289196e-06	0.000221490786256472	0.000139691124892456	DPP4/INSR/HPN/PPIA/GSK3B/HSPA8/MAN1B1/CCNT1/ISG20/PPARA/DDX6/STAT1/CD209/EGFR/APCS	15	0.0356294536817102
GO:0022409	BP	GO:0022409	positive regulation of cell-cell adhesion	13/174	322/18903	9.30933710667027e-06	0.00024051246278329	0.000151687828846971	DPP4/AKT1/CSK/ABL1/GP1BA/PNP/SELE/RHOA/SRC/SELP/FGG/CD209/CTSG	13	0.0403726708074534
GO:0044272	BP	GO:0044272	sulfur compound biosynthetic process	9/174	148/18903	9.44940081653769e-06	0.000242470339319593	0.000152922634052096	CBS/ACAT1/HAGH/PDK1/MTHFD1/PDK2/PAPSS1/MTAP/GCDH	9	0.0608108108108108
GO:0014855	BP	GO:0014855	striated muscle cell proliferation	7/174	81/18903	9.72786178972213e-06	0.000247929018046161	0.000156365345979886	ABL1/ERBB4/FGFR2/TGFB2/PPARD/SRC/MAPK14	7	0.0864197530864197
GO:0009063	BP	GO:0009063	cellular amino acid catabolic process	8/174	113/18903	9.87298491213796e-06	0.000249938920057613	0.000157632962920747	ARG2/AHCY/BCAT2/GSTZ1/CBS/ACAT1/SDS/OAT	8	0.0707964601769911
GO:0034614	BP	GO:0034614	cellular response to reactive oxygen species	9/174	150/18903	1.05322088464577e-05	0.000264849945125589	0.000167037136792943	AKT1/NQO1/ABL1/MAPK8/MAPK1/AKR1C3/PDK2/SRC/EGFR	9	0.06
GO:0043525	BP	GO:0043525	positive regulation of neuron apoptotic process	6/174	55/18903	1.11311030494222e-05	0.000278056428492852	0.000175366280179117	NQO1/ABL1/CASP3/TGFB2/RHOA/BACE1	6	0.109090909090909
GO:0072593	BP	GO:0072593	reactive oxygen species metabolic process	11/174	235/18903	1.17857023791229e-05	0.000290758028476625	0.000183377000713616	ARG2/NQO1/CBS/CBR1/GRB2/AKR1C3/MMP8/PPARA/RFK/RHOA/MAPK14	11	0.0468085106382979
GO:0009755	BP	GO:0009755	hormone-mediated signaling pathway	10/174	192/18903	1.17937376343912e-05	0.000290758028476625	0.000183377000713616	PARP1/THRB/RXRA/PPARA/RARB/NR1H3/PPARD/RHOA/SRC/AR	10	0.0520833333333333
GO:0002065	BP	GO:0002065	columnar/cuboidal epithelial cell differentiation	8/174	116/18903	1.1974164493175e-05	0.000293289275767896	0.000184973422792723	AKT1/ABL1/GSK3B/CDK6/RHEB/RARB/FGFR2/SRC	8	0.0689655172413793
GO:0000079	BP	GO:0000079	regulation of cyclin-dependent protein serine/threonine kinase activity	8/174	117/18903	1.2753269384731e-05	0.000310356981414227	0.000195737784784326	AKT1/KAT2B/CDK7/CCNA2/CCNT1/CASP3/SRC/EGFR	8	0.0683760683760684
GO:0010675	BP	GO:0010675	regulation of cellular carbohydrate metabolic process	9/174	155/18903	1.37132729597954e-05	0.000329707191694049	0.000207941690357915	AKT1/INSR/KAT2B/ACADM/PDK1/GSK3B/PPARA/PDK2/SRC	9	0.0580645161290323
GO:0006749	BP	GO:0006749	glutathione metabolic process	6/174	57/18903	1.37232314676473e-05	0.000329707191694049	0.000207941690357915	GLO1/GSTZ1/GSTT2/HAGH/GSR/GSTO1	6	0.105263157894737
GO:0019319	BP	GO:0019319	hexose biosynthetic process	7/174	86/18903	1.44633709808476e-05	0.000345290097087071	0.000217769609704967	SORD/KAT2B/ACADM/PPARA/PDK2/TPI1/SDS	7	0.0813953488372093
GO:0048010	BP	GO:0048010	vascular endothelial growth factor receptor signaling pathway	6/174	58/18903	1.51907570028777e-05	0.000360374436571412	0.00022728309054289	PTPN1/PTK2/PGF/SRC/KDR/MAPK14	6	0.103448275862069
GO:1904029	BP	GO:1904029	regulation of cyclin-dependent protein kinase activity	8/174	120/18903	1.53514818360468e-05	0.000361085848569647	0.000227731768088241	AKT1/KAT2B/CDK7/CCNA2/CCNT1/CASP3/SRC/EGFR	8	0.0666666666666667
GO:0071248	BP	GO:0071248	cellular response to metal ion	10/174	198/18903	1.54147486735232e-05	0.000361085848569647	0.000227731768088241	AKT1/NQO1/ALAD/PARP1/MAPK8/MAPK1/AKR1C3/HSD17B1/BACE1/EGFR	10	0.0505050505050505
GO:0009205	BP	GO:0009205	purine ribonucleoside triphosphate metabolic process	11/174	242/18903	1.55079288091948e-05	0.000361085848569647	0.000227731768088241	INSR/HK1/PARP1/IMPDH2/HSPA8/NMNAT1/IMPDH1/PPARA/TPI1/RHOA/PKLR	11	0.0454545454545455
GO:0001892	BP	GO:0001892	embryonic placenta development	7/174	87/18903	1.56080946424222e-05	0.000361188545958385	0.000227796537887467	AKT1/ST14/MAP2K1/MAPK1/GRB2/FGFR2/EGFR	7	0.0804597701149425
GO:0051235	BP	GO:0051235	maintenance of location	13/174	342/18903	1.76369253294346e-05	0.000405649282576995	0.000255837299387176	AKT1/HK1/ABL1/FKBP1A/HEXB/PRKACA/GP1BA/PPARA/NR1H3/GM2A/PPARD/ALB/GSTO1	13	0.0380116959064327
GO:0031098	BP	GO:0031098	stress-activated protein kinase signaling cascade	11/174	246/18903	1.80626106774882e-05	0.000412922227124155	0.000260424243260756	MAP2K1/XIAP/IGF1R/PPIA/MAPK8/MAPK1/MMP8/TGFB2/RHOA/EGFR/MAPK14	11	0.0447154471544715
GO:0002683	BP	GO:0002683	negative regulation of immune system process	15/174	449/18903	1.81857944677278e-05	0.000413043757671084	0.000260500890868072	ARG2/DPP4/AKT1/MIF/LGALS3/PARP1/CDK6/CASP3/TGFB2/NR1H3/SRC/APCS/CTSG/MMP12/MAPK14	15	0.0334075723830735
GO:0033866	BP	GO:0033866	nucleoside bisphosphate biosynthetic process	6/174	60/18903	1.85059371809155e-05	0.000413043757671084	0.000260500890868072	ACAT1/PDK1/PPCDC/PDK2/PAPSS1/GCDH	6	0.1
GO:0034030	BP	GO:0034030	ribonucleoside bisphosphate biosynthetic process	6/174	60/18903	1.85059371809155e-05	0.000413043757671084	0.000260500890868072	ACAT1/PDK1/PPCDC/PDK2/PAPSS1/GCDH	6	0.1
GO:0034033	BP	GO:0034033	purine nucleoside bisphosphate biosynthetic process	6/174	60/18903	1.85059371809155e-05	0.000413043757671084	0.000260500890868072	ACAT1/PDK1/PPCDC/PDK2/PAPSS1/GCDH	6	0.1
GO:0009119	BP	GO:0009119	ribonucleoside metabolic process	5/174	36/18903	1.86651845190767e-05	0.000413719065164364	0.000260926797809751	AHCY/APRT/ADK/PNP/MTAP	5	0.138888888888889
GO:0033002	BP	GO:0033002	muscle cell proliferation	11/174	247/18903	1.87555567717673e-05	0.000413719065164364	0.000260926797809751	AKT1/IGF1R/ABL1/ERBB4/STAT1/FGFR2/TGFB2/PPARD/RHOA/SRC/MAPK14	11	0.0445344129554656
GO:0046040	BP	GO:0046040	IMP metabolic process	4/174	18/18903	1.91875322304957e-05	0.000418354748979363	0.000263850458417526	APRT/PNP/ATIC/GART	4	0.222222222222222
GO:0046112	BP	GO:0046112	nucleobase biosynthetic process	4/174	18/18903	1.91875322304957e-05	0.000418354748979363	0.000263850458417526	APRT/UMPS/GART/DHODH	4	0.222222222222222
GO:0046364	BP	GO:0046364	monosaccharide biosynthetic process	7/174	90/18903	1.95003900742086e-05	0.000422732594022499	0.000266611503736911	SORD/KAT2B/ACADM/PPARA/PDK2/TPI1/SDS	7	0.0777777777777778
GO:0009199	BP	GO:0009199	ribonucleoside triphosphate metabolic process	11/174	249/18903	2.02108666958835e-05	0.000435630795296414	0.000274746217941032	INSR/HK1/PARP1/IMPDH2/HSPA8/NMNAT1/IMPDH1/PPARA/TPI1/RHOA/PKLR	11	0.0441767068273092
GO:0002068	BP	GO:0002068	glandular epithelial cell development	5/174	37/18903	2.14216588760147e-05	0.000456351811477771	0.000287814671524185	AKT1/GSK3B/CDK6/RHEB/RARB	5	0.135135135135135
GO:0071276	BP	GO:0071276	cellular response to cadmium ion	5/174	37/18903	2.14216588760147e-05	0.000456351811477771	0.000287814671524185	AKT1/MAPK8/MAPK1/AKR1C3/EGFR	5	0.135135135135135
GO:0033865	BP	GO:0033865	nucleoside bisphosphate metabolic process	8/174	126/18903	2.1898111844506e-05	0.000456351811477771	0.000287814671524185	HMGCR/SULT2B1/ACAT1/PDK1/PPCDC/PDK2/PAPSS1/GCDH	8	0.0634920634920635
GO:0033875	BP	GO:0033875	ribonucleoside bisphosphate metabolic process	8/174	126/18903	2.1898111844506e-05	0.000456351811477771	0.000287814671524185	HMGCR/SULT2B1/ACAT1/PDK1/PPCDC/PDK2/PAPSS1/GCDH	8	0.0634920634920635
GO:0034032	BP	GO:0034032	purine nucleoside bisphosphate metabolic process	8/174	126/18903	2.1898111844506e-05	0.000456351811477771	0.000287814671524185	HMGCR/SULT2B1/ACAT1/PDK1/PPCDC/PDK2/PAPSS1/GCDH	8	0.0634920634920635
GO:0038127	BP	GO:0038127	ERBB signaling pathway	8/174	126/18903	2.1898111844506e-05	0.000456351811477771	0.000287814671524185	AKT1/ABL1/MAPK1/GRB2/ERBB4/PTK2/SRC/EGFR	8	0.0634920634920635
GO:0022617	BP	GO:0022617	extracellular matrix disassembly	6/174	62/18903	2.23811107546462e-05	0.000463854669046843	0.000292546618308273	DPP4/HPN/MMP7/MMP8/CTSG/MMP12	6	0.0967741935483871
GO:0030100	BP	GO:0030100	regulation of endocytosis	10/174	209/18903	2.4573073153443e-05	0.000506500720955119	0.000319442883674323	CDC42/INSR/TNK2/ABL1/LGALS3/RAB5A/PTPN1/SELE/NR1H3/SRC	10	0.0478468899521531
GO:0021537	BP	GO:0021537	telencephalon development	11/174	255/18903	2.51794324842227e-05	0.000513388212597233	0.000323786727819877	IGF1R/GSK3B/ERBB4/CDK6/RARB/CASP3/ATIC/GART/RHOA/EGFR/RTN4R	11	0.0431372549019608
GO:0051402	BP	GO:0051402	neuron apoptotic process	11/174	255/18903	2.51794324842227e-05	0.000513388212597233	0.000323786727819877	NQO1/XIAP/ABL1/PARP1/THRB/CASP7/CASP3/TGFB2/RHOA/BACE1/KDR	11	0.0431372549019608
GO:0006144	BP	GO:0006144	purine nucleobase metabolic process	4/174	20/18903	2.99462376292124e-05	0.000604049242445931	0.000380965364717253	APRT/ADK/GMPR2/GART	4	0.2
GO:0051882	BP	GO:0051882	mitochondrial depolarization	4/174	20/18903	2.99462376292124e-05	0.000604049242445931	0.000380965364717253	ABL1/PARP1/SRC/KDR	4	0.2
GO:0009132	BP	GO:0009132	nucleoside diphosphate metabolic process	8/174	132/18903	3.06420476412596e-05	0.000614796828206549	0.000387743715953229	INSR/HK1/UMPS/PPARA/DTYMK/TPI1/DHODH/PKLR	8	0.0606060606060606
GO:0031668	BP	GO:0031668	cellular response to extracellular stimulus	11/174	262/18903	3.22812212404157e-05	0.000642241290015333	0.000405052552166839	CBS/IGF1R/MAPK8/MAPK1/NR1H4/RXRA/HSPA8/AKR1C3/PPARA/PDK2/ALB	11	0.0419847328244275
GO:0030168	BP	GO:0030168	platelet activation	8/174	133/18903	3.23504361354489e-05	0.000642241290015333	0.000405052552166839	CLIC1/PPIA/GP1BA/SRC/SELP/FGG/CTSG/MAPK14	8	0.0601503759398496
GO:0043491	BP	GO:0043491	protein kinase B signaling	10/174	218/18903	3.52165878772258e-05	0.000695481515564898	0.000438630413902068	AKT1/INSR/IGF1R/AKR1C3/PPARA/PTK2/SRC/KDR/EGFR/HSP90AA1	10	0.0458715596330275
GO:2001237	BP	GO:2001237	negative regulation of extrinsic apoptotic signaling pathway	7/174	99/18903	3.62521335866124e-05	0.000712203374420322	0.000449176655185	AKT1/LGALS3/CTNNA1/GSK3B/SRC/FGG/AR	7	0.0707070707070707
GO:0045056	BP	GO:0045056	transcytosis	4/174	21/18903	3.67273243018695e-05	0.000717800348531875	0.000452706588067767	RAB11A/IGF1R/RAB5A/SRC	4	0.19047619047619
GO:0050673	BP	GO:0050673	epithelial cell proliferation	15/174	481/18903	4.02246365423024e-05	0.000779149131304539	0.000491398402843182	AKT1/MAP2K1/CDC42/HPN/MAPK1/CDK6/STAT1/FGFR2/TGFB2/PPARD/PGF/KDR/EGFR/MMP12/AR	15	0.0311850311850312
GO:0010907	BP	GO:0010907	positive regulation of glucose metabolic process	5/174	42/18903	4.02794487286281e-05	0.000779149131304539	0.000491398402843182	AKT1/INSR/KAT2B/PPARA/SRC	5	0.119047619047619
GO:0061180	BP	GO:0061180	mammary gland epithelium development	6/174	69/18903	4.13844091622433e-05	0.000796438731428478	0.000502302710562137	AKT1/MAPK1/ERBB4/FGFR2/SRC/AR	6	0.0869565217391304
GO:0030879	BP	GO:0030879	mammary gland development	8/174	138/18903	4.21354119560396e-05	0.000806775502021226	0.0005088219664475	AKT1/APRT/UMPS/MAPK1/ERBB4/FGFR2/SRC/AR	8	0.0579710144927536
GO:0008203	BP	GO:0008203	cholesterol metabolic process	8/174	139/18903	4.43621855648553e-05	0.000839895750580195	0.000529710441567015	EPHX2/HMGCR/SULT2B1/FDPS/CYP2C9/NR1H4/SEC14L2/PPARD	8	0.0575539568345324
GO:2001233	BP	GO:2001233	regulation of apoptotic signaling pathway	13/174	374/18903	4.46365133712317e-05	0.000839895750580195	0.000529710441567015	AKT1/MIF/LGALS3/PPIA/CSNK2A1/PARP1/MDM2/CTNNA1/GSK3B/PTPN1/SRC/FGG/AR	13	0.0347593582887701
GO:0035265	BP	GO:0035265	organ growth	9/174	180/18903	4.47717604493663e-05	0.000839895750580195	0.000529710441567015	AKT1/ABL1/ERBB4/PPARA/RARB/FGFR2/TGFB2/MAPK14/AR	9	0.05
GO:0051881	BP	GO:0051881	regulation of mitochondrial membrane potential	6/174	70/18903	4.49219266901588e-05	0.000839895750580195	0.000529710441567015	AKT1/CLIC1/ABL1/PARP1/SRC/KDR	6	0.0857142857142857
GO:0001503	BP	GO:0001503	ossification	14/174	429/18903	4.49785105029691e-05	0.000839895750580195	0.000529710441567015	AKT1/CLIC1/CBS/MAPK1/GSK3B/RXRA/PRKACA/CDK6/FGFR2/TGFB2/PTK2/RHOA/EGFR/MAPK14	14	0.0326340326340326
GO:0007596	BP	GO:0007596	blood coagulation	10/174	225/18903	4.60188958446178e-05	0.000855090025250731	0.000539293256981261	CLIC1/PPIA/GP1BA/ANXA5/SRC/SELP/FGG/CTSG/PLAU/MAPK14	10	0.0444444444444444
GO:0008202	BP	GO:0008202	steroid metabolic process	12/174	323/18903	4.66559095389851e-05	0.000860849926217719	0.000542925945541119	EPHX2/HMGCR/CBR1/SULT2B1/IGF1R/FDPS/CYP2C9/NR1H4/SEC14L2/AKR1C3/HSD17B1/PPARD	12	0.0371517027863777
GO:0043255	BP	GO:0043255	regulation of carbohydrate biosynthetic process	7/174	103/18903	4.678532207705e-05	0.000860849926217719	0.000542925945541119	AKT1/INSR/KAT2B/ACADM/GSK3B/PPARA/PDK2	7	0.0679611650485437
GO:0051651	BP	GO:0051651	maintenance of location in cell	10/174	226/18903	4.77717365824692e-05	0.000874732963053756	0.000551681781688198	AKT1/HK1/ABL1/FKBP1A/HEXB/PRKACA/GP1BA/GM2A/ALB/GSTO1	10	0.0442477876106195
GO:1901607	BP	GO:1901607	alpha-amino acid biosynthetic process	6/174	71/18903	4.86975770633562e-05	0.000884879343996912	0.000558080961498303	BCAT2/CBS/MTHFD1/SDS/OAT/MTAP	6	0.0845070422535211
GO:0046890	BP	GO:0046890	regulation of lipid biosynthetic process	9/174	182/18903	4.87950433593207e-05	0.000884879343996912	0.000558080961498303	AKT1/FABP5/IGF1R/NR1H4/SEC14L2/AKR1C3/PPARA/NR1H3/FABP3	9	0.0494505494505494
GO:1901214	BP	GO:1901214	regulation of neuron death	12/174	325/18903	4.95166371962132e-05	0.000893668686622565	0.000563624276320533	AKT1/NQO1/ABL1/PARP1/GSK3B/NMNAT1/PPARA/CASP3/TGFB2/RHOA/BACE1/KDR	12	0.0369230769230769
GO:1903039	BP	GO:1903039	positive regulation of leukocyte cell-cell adhesion	11/174	275/18903	5.01286946062215e-05	0.000900406838355559	0.000567873933885015	DPP4/AKT1/CSK/ABL1/GP1BA/PNP/SELE/RHOA/SRC/SELP/CD209	11	0.04
GO:0071902	BP	GO:0071902	positive regulation of protein serine/threonine kinase activity	10/174	229/18903	5.33762600319898e-05	0.000954195511093202	0.000601797693550995	AKT1/MAP2K1/MIF/INSR/CSK/PTPN1/CCNT1/RHOA/SRC/EGFR	10	0.0436681222707424
GO:0050817	BP	GO:0050817	coagulation	10/174	230/18903	5.53648331031783e-05	0.000985076181439569	0.000621273698178664	CLIC1/PPIA/GP1BA/ANXA5/SRC/SELP/FGG/CTSG/PLAU/MAPK14	10	0.0434782608695652
GO:0030900	BP	GO:0030900	forebrain development	13/174	383/18903	5.6895391696238e-05	0.00100265719114146	0.000632361793821424	IGF1R/GSK3B/ERBB4/CDK6/RARB/CASP3/ATIC/GART/FGFR2/RHOA/SRC/EGFR/RTN4R	13	0.0339425587467363
GO:0002067	BP	GO:0002067	glandular epithelial cell differentiation	6/174	73/18903	5.70102913696845e-05	0.00100265719114146	0.000632361793821424	AKT1/GSK3B/CDK6/RHEB/RARB/FGFR2	6	0.0821917808219178
GO:0007599	BP	GO:0007599	hemostasis	10/174	231/18903	5.74162124301576e-05	0.00100265719114146	0.000632361793821424	CLIC1/PPIA/GP1BA/ANXA5/SRC/SELP/FGG/CTSG/PLAU/MAPK14	10	0.0432900432900433
GO:0031669	BP	GO:0031669	cellular response to nutrient levels	10/174	231/18903	5.74162124301576e-05	0.00100265719114146	0.000632361793821424	IGF1R/MAPK8/MAPK1/NR1H4/RXRA/HSPA8/AKR1C3/PPARA/PDK2/ALB	10	0.0432900432900433
GO:0006109	BP	GO:0006109	regulation of carbohydrate metabolic process	9/174	186/18903	5.77631057131605e-05	0.00100406651958544	0.000633250637456914	AKT1/INSR/KAT2B/ACADM/PDK1/GSK3B/PPARA/PDK2/SRC	9	0.0483870967741935
GO:0045936	BP	GO:0045936	negative regulation of phosphate metabolic process	14/174	440/18903	5.906086632786e-05	0.00102191554031508	0.000644507763886835	AKT1/HMGCR/KAT2B/CSK/ABL1/LGALS3/FKBP1A/PPIA/PARP1/GSK3B/PTPN1/PPARA/CASP3/TGFB2	14	0.0318181818181818
GO:0030324	BP	GO:0030324	lung development	9/174	187/18903	6.02103601052127e-05	0.00103704784619572	0.000654051496456528	MAP2K1/CDC42/EIF4E/MME/THRB/MAPK1/FGFR2/KDR/MMP12	9	0.0481283422459893
GO:0010563	BP	GO:0010563	negative regulation of phosphorus metabolic process	14/174	441/18903	6.05141314225607e-05	0.00103754228966318	0.000654363334999939	AKT1/HMGCR/KAT2B/CSK/ABL1/LGALS3/FKBP1A/PPIA/PARP1/GSK3B/PTPN1/PPARA/CASP3/TGFB2	14	0.0317460317460317
GO:0042398	BP	GO:0042398	cellular modified amino acid biosynthetic process	5/174	46/18903	6.30052922307447e-05	0.00107536634522339	0.000678218435063029	HAGH/ACADM/ATIC/GART/MTHFD1	5	0.108695652173913
GO:0016042	BP	GO:0016042	lipid catabolic process	12/174	336/18903	6.81264989093637e-05	0.00115753672921676	0.000730042140991758	AKT1/CRAT/ACAT1/ACADM/HEXB/AKR1C3/PPARA/GM2A/PPARD/PDE3B/GCDH/HADH	12	0.0357142857142857
GO:0030323	BP	GO:0030323	respiratory tube development	9/174	191/18903	7.08925449892151e-05	0.00119361685517743	0.000752797369174802	MAP2K1/CDC42/EIF4E/MME/THRB/MAPK1/FGFR2/KDR/MMP12	9	0.0471204188481675
GO:0006766	BP	GO:0006766	vitamin metabolic process	7/174	110/18903	7.11993086996079e-05	0.00119361685517743	0.000752797369174802	NQO1/CBR1/PNPO/AKR1C3/RFK/PPARD/GSTO1	7	0.0636363636363636
GO:0007173	BP	GO:0007173	epidermal growth factor receptor signaling pathway	7/174	110/18903	7.11993086996079e-05	0.00119361685517743	0.000752797369174802	AKT1/ABL1/GRB2/ERBB4/PTK2/SRC/EGFR	7	0.0636363636363636
GO:0006809	BP	GO:0006809	nitric oxide biosynthetic process	6/174	76/18903	7.15683539615223e-05	0.00119449482806576	0.000753351094331813	ARG2/AKT1/NQO1/INSR/MMP8/HSP90AA1	6	0.0789473684210526
GO:1902652	BP	GO:1902652	secondary alcohol metabolic process	8/174	149/18903	7.25611077180873e-05	0.00120044078207292	0.000757101123928335	EPHX2/HMGCR/SULT2B1/FDPS/CYP2C9/NR1H4/SEC14L2/PPARD	8	0.0536912751677852
GO:2000377	BP	GO:2000377	regulation of reactive oxygen species metabolic process	8/174	149/18903	7.25611077180873e-05	0.00120044078207292	0.000757101123928335	ARG2/CBR1/GRB2/AKR1C3/MMP8/PPARA/RHOA/MAPK14	8	0.0536912751677852
GO:0007160	BP	GO:0007160	cell-matrix adhesion	10/174	238/18903	7.36735776358148e-05	0.00121030431686997	0.000763321916650705	ABL1/GSK3B/CDK6/PTK2/RHOA/SRC/FGG/KDR/PLAU/MMP12	10	0.0420168067226891
GO:0031099	BP	GO:0031099	regeneration	9/174	192/18903	7.37990437115836e-05	0.00121030431686997	0.000763321916650705	MAP2K1/IGF1R/CTNNA1/CCNA2/ERBB4/ATIC/PPARD/PGF/RTN4R	9	0.046875
GO:0018107	BP	GO:0018107	peptidyl-threonine phosphorylation	7/174	111/18903	7.54091884323725e-05	0.0012158681889866	0.000766830972570667	AKT1/CSNK2A1/MAPK8/MAPK1/GSK3B/PRKACA/CLK1	7	0.0630630630630631
GO:0003323	BP	GO:0003323	type B pancreatic cell development	4/174	25/18903	7.54276660187872e-05	0.0012158681889866	0.000766830972570667	AKT1/GSK3B/CDK6/RHEB	4	0.16
GO:0046033	BP	GO:0046033	AMP metabolic process	4/174	25/18903	7.54276660187872e-05	0.0012158681889866	0.000766830972570667	APRT/ADK/ATIC/GART	4	0.16
GO:1904996	BP	GO:1904996	positive regulation of leukocyte adhesion to vascular endothelial cell	4/174	25/18903	7.54276660187872e-05	0.0012158681889866	0.000766830972570667	GP1BA/SELE/RHOA/SELP	4	0.16
GO:0070371	BP	GO:0070371	ERK1 and ERK2 cascade	12/174	340/18903	7.62522793438543e-05	0.0012193147503241	0.000769004670350079	MAP2K1/MIF/CSK/ABL1/MAPK1/PTPN1/ERBB4/FGFR2/SRC/FGG/KDR/EGFR	12	0.0352941176470588
GO:0051403	BP	GO:0051403	stress-activated MAPK cascade	10/174	239/18903	7.62879854391539e-05	0.0012193147503241	0.000769004670350079	MAP2K1/XIAP/IGF1R/PPIA/MAPK8/MAPK1/MMP8/TGFB2/EGFR/MAPK14	10	0.0418410041841004
GO:0009314	BP	GO:0009314	response to radiation	14/174	452/18903	7.86848864327551e-05	0.00125174651269779	0.00078945892691215	AKT1/HMGCR/FECH/MME/ALAD/PARP1/MDM2/MAPK8/CASP7/GRB2/CASP3/BACE1/EGFR/MAPK14	14	0.0309734513274336
GO:0030595	BP	GO:0030595	leukocyte chemotaxis	10/174	240/18903	7.89808245021403e-05	0.00125174651269779	0.00078945892691215	DPP4/MIF/PDE4B/LGALS3/PPIA/MAPK1/TGFB2/PTK2/PGF/CTSG	10	0.0416666666666667
GO:0048738	BP	GO:0048738	cardiac muscle tissue development	10/174	241/18903	8.17539942686233e-05	0.00129027642837342	0.000813759203026156	CDC42/ABL1/FKBP1A/ACADM/ERBB4/PPARA/RARB/FGFR2/TGFB2/MAPK14	10	0.04149377593361
GO:0062013	BP	GO:0062013	positive regulation of small molecule metabolic process	8/174	152/18903	8.34649845015353e-05	0.00131179133974913	0.000827328355146797	AKT1/INSR/KAT2B/NR1H4/PPARA/NR1H3/PPARD/SRC	8	0.0526315789473684
GO:0097529	BP	GO:0097529	myeloid leukocyte migration	10/174	242/18903	8.46094281246336e-05	0.00132426042691335	0.000835192433114968	DPP4/MIF/PDE4B/LGALS3/PPIA/MAPK1/TGFB2/PTK2/PGF/CTSG	10	0.0413223140495868
GO:0033628	BP	GO:0033628	regulation of cell adhesion mediated by integrin	5/174	49/18903	8.57173343387334e-05	0.00133605696332935	0.000842632342781808	DPP4/TGFB2/PTK2/PDE3B/PLAU	5	0.102040816326531
GO:0016331	BP	GO:0016331	morphogenesis of embryonic epithelium	8/174	153/18903	8.73883249181709e-05	0.00135056005700674	0.000851779240061183	ST14/ABL1/PRKACA/CASP3/MTHFD1/FGFR2/TGFB2/AR	8	0.0522875816993464
GO:0009396	BP	GO:0009396	folic acid-containing compound biosynthetic process	3/174	10/18903	8.77219549222302e-05	0.00135056005700674	0.000851779240061183	ATIC/GART/MTHFD1	3	0.3
GO:0060502	BP	GO:0060502	epithelial cell proliferation involved in lung morphogenesis	3/174	10/18903	8.77219549222302e-05	0.00135056005700674	0.000851779240061183	MAP2K1/CDC42/FGFR2	3	0.3
GO:0008652	BP	GO:0008652	cellular amino acid biosynthetic process	6/174	79/18903	8.89489786759331e-05	0.00136332664373255	0.000859830946820216	BCAT2/CBS/MTHFD1/SDS/OAT/MTAP	6	0.0759493670886076
GO:0009185	BP	GO:0009185	ribonucleoside diphosphate metabolic process	7/174	114/18903	8.92740405625503e-05	0.00136332664373255	0.000859830946820216	INSR/HK1/UMPS/PPARA/TPI1/DHODH/PKLR	7	0.0614035087719298
GO:0051222	BP	GO:0051222	positive regulation of protein transport	11/174	294/18903	9.11587824837596e-05	0.00138554150309299	0.000873841546294067	PPIA/MAPK8/NR1H4/GSK3B/PRKACA/TGFB2/PPARD/SRC/FGG/HSP90AA1/MAPK14	11	0.0374149659863946
GO:0016125	BP	GO:0016125	sterol metabolic process	8/174	154/18903	9.14633706972839e-05	0.00138554150309299	0.000873841546294067	EPHX2/HMGCR/SULT2B1/FDPS/CYP2C9/NR1H4/SEC14L2/PPARD	8	0.051948051948052
GO:1901617	BP	GO:1901617	organic hydroxy compound biosynthetic process	10/174	245/18903	9.36891644725388e-05	0.00141358211356166	0.000891526365086053	HMGCR/FDPS/IMPA1/PNPO/NR1H4/ALDH2/SEC14L2/AKR1C3/HSD17B1/TGFB2	10	0.0408163265306122
GO:0006692	BP	GO:0006692	prostanoid metabolic process	5/174	50/18903	9.45372533599494e-05	0.00141505761775289	0.000892456944834944	FABP5/MIF/CBR1/CES2/AKR1C3	5	0.1
GO:0006693	BP	GO:0006693	prostaglandin metabolic process	5/174	50/18903	9.45372533599494e-05	0.00141505761775289	0.000892456944834944	FABP5/MIF/CBR1/CES2/AKR1C3	5	0.1
GO:0051702	BP	GO:0051702	biological process involved in interaction with symbiont	7/174	116/18903	9.96211321438512e-05	0.00148526051559924	0.000936732925504904	CDC42/HPN/RAB5A/HSPA8/CCNT1/APCS/CTSG	7	0.0603448275862069
GO:0043393	BP	GO:0043393	regulation of protein binding	9/174	200/18903	0.00010087216228567	0.00149799132339191	0.00094476206699384	AKT1/CDC42/ABL1/FKBP1A/MAPK8/GSK3B/PRKACA/PPARA/SRC	9	0.045
GO:0006760	BP	GO:0006760	folic acid-containing compound metabolic process	4/174	27/18903	0.000103152519101503	0.00152584824333674	0.000962331034754992	FOLH1/ATIC/GART/MTHFD1	4	0.148148148148148
GO:0042593	BP	GO:0042593	glucose homeostasis	10/174	248/18903	0.000103582210337922	0.00152621913044782	0.000962564948041546	AKT1/FABP5/INSR/HK1/IGF1R/NR1H4/PRKACA/PYGL/PDK2/PPARD	10	0.0403225806451613
GO:0033500	BP	GO:0033500	carbohydrate homeostasis	10/174	249/18903	0.000107070551076083	0.00157147906092991	0.000991109749874863	AKT1/FABP5/INSR/HK1/IGF1R/NR1H4/PRKACA/PYGL/PDK2/PPARD	10	0.0401606425702811
GO:0022408	BP	GO:0022408	negative regulation of cell-cell adhesion	9/174	202/18903	0.00010880877699436	0.00159080118923537	0.00100329594454204	ARG2/AKT1/ABL1/LGALS3/PPARA/CASP3/PTK2/FGG/CTSG	9	0.0445544554455446
GO:0046209	BP	GO:0046209	nitric oxide metabolic process	6/174	82/18903	0.000109533883354668	0.00159521933596065	0.00100608240756574	ARG2/AKT1/NQO1/INSR/MMP8/HSP90AA1	6	0.0731707317073171
GO:0006094	BP	GO:0006094	gluconeogenesis	6/174	83/18903	0.000117177751720363	0.00169346543865597	0.00106804484326687	KAT2B/ACADM/PPARA/PDK2/TPI1/SDS	6	0.072289156626506
GO:2001057	BP	GO:2001057	reactive nitrogen species metabolic process	6/174	83/18903	0.000117177751720363	0.00169346543865597	0.00106804484326687	ARG2/AKT1/NQO1/INSR/MMP8/HSP90AA1	6	0.072289156626506
GO:0006188	BP	GO:0006188	IMP biosynthetic process	3/174	11/18903	0.000119801591874815	0.00170525133793132	0.00107547804423865	APRT/ATIC/GART	3	0.272727272727273
GO:0010887	BP	GO:0010887	negative regulation of cholesterol storage	3/174	11/18903	0.000119801591874815	0.00170525133793132	0.00107547804423865	PPARA/NR1H3/PPARD	3	0.272727272727273
GO:0060020	BP	GO:0060020	Bergmann glial cell differentiation	3/174	11/18903	0.000119801591874815	0.00170525133793132	0.00107547804423865	MAP2K1/ABL1/MAPK1	3	0.272727272727273
GO:0071872	BP	GO:0071872	cellular response to epinephrine stimulus	3/174	11/18903	0.000119801591874815	0.00170525133793132	0.00107547804423865	PDE4B/PRKACA/PKLR	3	0.272727272727273
GO:0097305	BP	GO:0097305	response to alcohol	10/174	253/18903	0.000122036587283521	0.00173053386177985	0.00109142337657601	AKT1/NQO1/IGF1R/ALAD/PARP1/CTNNA1/AKR1C3/PPARA/FGFR2/RHOA	10	0.0395256916996047
GO:0018210	BP	GO:0018210	peptidyl-threonine modification	7/174	120/18903	0.000123248281348758	0.00173467357181909	0.00109403423349644	AKT1/CSNK2A1/MAPK8/MAPK1/GSK3B/PRKACA/CLK1	7	0.0583333333333333
GO:0051897	BP	GO:0051897	positive regulation of protein kinase B signaling	7/174	120/18903	0.000123248281348758	0.00173467357181909	0.00109403423349644	INSR/IGF1R/AKR1C3/PTK2/SRC/EGFR/HSP90AA1	7	0.0583333333333333
GO:0050678	BP	GO:0050678	regulation of epithelial cell proliferation	13/174	414/18903	0.000124270107103209	0.00174255332339518	0.0010990038820319	AKT1/CDC42/HPN/CDK6/STAT1/FGFR2/TGFB2/PPARD/PGF/KDR/EGFR/MMP12/AR	13	0.0314009661835749
GO:0048146	BP	GO:0048146	positive regulation of fibroblast proliferation	5/174	53/18903	0.000125224580408391	0.00174317904271599	0.00109939851441038	MIF/ABL1/CCNA2/CDK6/EGFR	5	0.0943396226415094
GO:0051851	BP	GO:0051851	modulation by host of symbiont process	6/174	84/18903	0.000125239003334049	0.00174317904271599	0.00109939851441038	CDC42/HPN/RAB5A/HSPA8/CCNT1/APCS	6	0.0714285714285714
GO:0042176	BP	GO:0042176	regulation of protein catabolic process	12/174	361/18903	0.000134077371279195	0.00185933766347472	0.00117265812341711	AKT1/HMGCR/NQO1/ALAD/CSNK2A1/MDM2/FHIT/GSK3B/PRKACA/EGFR/CDK2/HSP90AA1	12	0.0332409972299169
GO:0046164	BP	GO:0046164	alcohol catabolic process	5/174	54/18903	0.000136982955184843	0.0018857653538585	0.00118932569618804	SORD/IMPA1/ALDH2/AKR1C3/TPI1	5	0.0925925925925926
GO:0072523	BP	GO:0072523	purine-containing compound catabolic process	5/174	54/18903	0.000136982955184843	0.0018857653538585	0.00118932569618804	AHCY/PDE4B/ACAT1/HINT1/PNP	5	0.0925925925925926
GO:0008544	BP	GO:0008544	epidermis development	12/174	362/18903	0.000137580333913037	0.00188710188916354	0.00119016863021421	FABP5/ST14/MAP2K1/INSR/SULT2B1/AKR1C3/PPARA/CASP3/FGFR2/TGFB2/PPARD/EGFR	12	0.0331491712707182
GO:0014706	BP	GO:0014706	striated muscle tissue development	10/174	257/18903	0.000138735179987818	0.00189604745983351	0.00119581047586754	CDC42/ABL1/FKBP1A/ACADM/ERBB4/PPARA/RARB/FGFR2/TGFB2/MAPK14	10	0.0389105058365759
GO:1904951	BP	GO:1904951	positive regulation of establishment of protein localization	11/174	310/18903	0.000145335152678859	0.0019790765195114	0.00124817573647814	PPIA/MAPK8/NR1H4/GSK3B/PRKACA/TGFB2/PPARD/SRC/FGG/HSP90AA1/MAPK14	11	0.0354838709677419
GO:0031960	BP	GO:0031960	response to corticosteroid	8/174	165/18903	0.000147669387870167	0.00200362924836787	0.00126366079737439	EIF4E/IGF1R/ALAD/PARP1/AKR1C3/CASP3/RHOA/SRC	8	0.0484848484848485
GO:1904645	BP	GO:1904645	response to amyloid-beta	5/174	55/18903	0.000149568140398385	0.00202211837126419	0.00127532162724147	IGF1R/PARP1/GSK3B/BACE1/MMP12	5	0.0909090909090909
GO:0009612	BP	GO:0009612	response to mechanical stimulus	9/174	211/18903	0.00015130909023028	0.00202389322109438	0.00127644100007627	HPN/IGF1R/MAPK8/STAT1/PTK2/RHOA/SRC/BACE1/MAPK14	9	0.042654028436019
GO:0042594	BP	GO:0042594	response to starvation	9/174	211/18903	0.00015130909023028	0.00202389322109438	0.00127644100007627	ACAT1/IGF1R/ACADM/MAPK8/MAPK1/HSPA8/AKR1C3/PPARA/ALB	9	0.042654028436019
GO:0060541	BP	GO:0060541	respiratory system development	9/174	211/18903	0.00015130909023028	0.00202389322109438	0.00127644100007627	MAP2K1/CDC42/EIF4E/MME/THRB/MAPK1/FGFR2/KDR/MMP12	9	0.042654028436019
GO:0043094	BP	GO:0043094	cellular metabolic compound salvage	4/174	30/18903	0.000157645928849704	0.00209247273497865	0.00131969313530495	APRT/ADK/PNP/MTAP	4	0.133333333333333
GO:0019627	BP	GO:0019627	urea metabolic process	3/174	12/18903	0.000158655143744404	0.00209247273497865	0.00131969313530495	ARG2/CYP2C9/NR1H4	3	0.25
GO:0071941	BP	GO:0071941	nitrogen cycle metabolic process	3/174	12/18903	0.000158655143744404	0.00209247273497865	0.00131969313530495	ARG2/CYP2C9/NR1H4	3	0.25
GO:1903238	BP	GO:1903238	positive regulation of leukocyte tethering or rolling	3/174	12/18903	0.000158655143744404	0.00209247273497865	0.00131969313530495	GP1BA/SELE/SELP	3	0.25
GO:0046889	BP	GO:0046889	positive regulation of lipid biosynthetic process	6/174	88/18903	0.000161989366488034	0.00212036741543689	0.00133728591809102	AKT1/IGF1R/NR1H4/PPARA/NR1H3/FABP3	6	0.0681818181818182
GO:0002064	BP	GO:0002064	epithelial cell development	9/174	213/18903	0.000162428537828832	0.00212036741543689	0.00133728591809102	AKT1/ST14/GSK3B/CDK6/RHEB/RARB/SRC/KDR/AR	9	0.0422535211267606
GO:0019932	BP	GO:0019932	second-messenger-mediated signaling	11/174	314/18903	0.000162520080909692	0.00212036741543689	0.00133728591809102	CBS/GSK3B/HINT1/PRKACA/SELE/PDK2/SELP/KDR/EGFR/PDE3B/GSTO1	11	0.035031847133758
GO:0010676	BP	GO:0010676	positive regulation of cellular carbohydrate metabolic process	5/174	56/18903	0.000163018703731892	0.00212036741543689	0.00133728591809102	AKT1/INSR/KAT2B/PPARA/SRC	5	0.0892857142857143
GO:0031589	BP	GO:0031589	cell-substrate adhesion	12/174	369/18903	0.000164372429414563	0.00213062819158671	0.00134375724534966	CDC42/ABL1/GSK3B/CDK6/PTK2/PPARD/RHOA/SRC/FGG/KDR/PLAU/MMP12	12	0.032520325203252
GO:0070372	BP	GO:0070372	regulation of ERK1 and ERK2 cascade	11/174	315/18903	0.000167076536541712	0.00215479541785103	0.00135899917518093	MAP2K1/MIF/CSK/ABL1/PTPN1/ERBB4/FGFR2/SRC/FGG/KDR/EGFR	11	0.0349206349206349
GO:1903522	BP	GO:1903522	regulation of blood circulation	10/174	263/18903	0.00016737938956266	0.00215479541785103	0.00135899917518093	PDE4B/ABL1/THRB/MDM2/PRKACA/TGFB2/RHOA/FGG/GSTO1/HSP90AA1	10	0.0380228136882129
GO:0051098	BP	GO:0051098	regulation of binding	12/174	372/18903	0.000177153951348878	0.00227287314451689	0.00143346913730205	AKT1/CDC42/DOT1L/ABL1/FKBP1A/PARP1/MAPK8/GSK3B/PRKACA/MMP8/PPARA/SRC	12	0.032258064516129
GO:0003309	BP	GO:0003309	type B pancreatic cell differentiation	4/174	31/18903	0.000179707336837745	0.00229005430591883	0.00144430505424361	AKT1/GSK3B/CDK6/RHEB	4	0.129032258064516
GO:0033688	BP	GO:0033688	regulation of osteoblast proliferation	4/174	31/18903	0.000179707336837745	0.00229005430591883	0.00144430505424361	IGF1R/ABL1/FGFR2/RHOA	4	0.129032258064516
GO:0060191	BP	GO:0060191	regulation of lipase activity	6/174	90/18903	0.000183309994923029	0.00232809865605947	0.0014682990910014	ABL1/FGFR2/SELE/NR1H3/RHOA/EGFR	6	0.0666666666666667
GO:0060326	BP	GO:0060326	cell chemotaxis	11/174	319/18903	0.000186404444839994	0.00235945491924986	0.0014880750453493	DPP4/MIF/PDE4B/LGALS3/PPIA/MAPK1/TGFB2/PTK2/PGF/KDR/CTSG	11	0.0344827586206897
GO:0072330	BP	GO:0072330	monocarboxylic acid biosynthetic process	9/174	218/18903	0.000193244509760982	0.00243785381544624	0.00153752012694885	FABP5/MIF/CBR1/CYP2C9/NR1H4/AKR1C3/NR1H3/SDS/PKLR	9	0.0412844036697248
GO:0016049	BP	GO:0016049	cell growth	14/174	493/18903	0.000194831670093634	0.0024496835319773	0.00154498096284777	AKT1/CDC42/HPN/ABL1/CSNK2A1/PAK6/GSK3B/PPARA/TGFB2/PPARD/RHOA/EGFR/HSP90AA1/RTN4R	14	0.0283975659229209
GO:0050863	BP	GO:0050863	regulation of T cell activation	12/174	376/18903	0.000195511432577885	0.00245006353383316	0.00154522062467571	ARG2/DPP4/AKT1/CSK/ABL1/LGALS3/PNP/CASP3/RHOA/SRC/CD209/CTSG	12	0.0319148936170213
GO:1903034	BP	GO:1903034	regulation of response to wounding	8/174	172/18903	0.000196402299579512	0.00245307772852291	0.00154712163488915	MAP2K1/IGF1R/GP1BA/PTK2/FGG/APCS/PLAU/RTN4R	8	0.0465116279069767
GO:0071621	BP	GO:0071621	granulocyte chemotaxis	7/174	130/18903	0.000202679866851627	0.00251700972724036	0.0015874426476428	DPP4/PDE4B/LGALS3/PPIA/MAPK1/TGFB2/PTK2	7	0.0538461538461538
GO:0001516	BP	GO:0001516	prostaglandin biosynthetic process	4/174	32/18903	0.000203912444211411	0.00251700972724036	0.0015874426476428	FABP5/MIF/CBR1/AKR1C3	4	0.125
GO:0046457	BP	GO:0046457	prostanoid biosynthetic process	4/174	32/18903	0.000203912444211411	0.00251700972724036	0.0015874426476428	FABP5/MIF/CBR1/AKR1C3	4	0.125
GO:0009133	BP	GO:0009133	nucleoside diphosphate biosynthetic process	3/174	13/18903	0.00020485736645355	0.00251700972724036	0.0015874426476428	UMPS/DTYMK/DHODH	3	0.230769230769231
GO:0060670	BP	GO:0060670	branching involved in labyrinthine layer morphogenesis	3/174	13/18903	0.00020485736645355	0.00251700972724036	0.0015874426476428	ST14/GRB2/FGFR2	3	0.230769230769231
GO:0001843	BP	GO:0001843	neural tube closure	6/174	92/18903	0.000206787515814861	0.00253247568069369	0.00159719680704575	ST14/ABL1/PRKACA/CASP3/MTHFD1/TGFB2	6	0.0652173913043478
GO:0021543	BP	GO:0021543	pallium development	8/174	174/18903	0.00021252590234853	0.00259408502151109	0.00163605295211672	IGF1R/GSK3B/CDK6/CASP3/ATIC/GART/RHOA/EGFR	8	0.0459770114942529
GO:0071560	BP	GO:0071560	cellular response to transforming growth factor beta stimulus	10/174	271/18903	0.000213193625839989	0.00259408502151109	0.00163605295211672	IGF1R/ABL1/FKBP1A/PARP1/PPARA/FGFR2/TGFB2/PTK2/SRC/FNTA	10	0.03690036900369
GO:0051781	BP	GO:0051781	positive regulation of cell division	6/174	93/18903	0.000219382440524486	0.0026379756425521	0.00166373414973705	CDC42/IGF1R/FGFR2/TGFB2/PGF/RHOA	6	0.0645161290322581
GO:0055017	BP	GO:0055017	cardiac muscle tissue growth	6/174	93/18903	0.000219382440524486	0.0026379756425521	0.00166373414973705	ABL1/ERBB4/PPARA/FGFR2/TGFB2/MAPK14	6	0.0645161290322581
GO:0060606	BP	GO:0060606	tube closure	6/174	93/18903	0.000219382440524486	0.0026379756425521	0.00166373414973705	ST14/ABL1/PRKACA/CASP3/MTHFD1/TGFB2	6	0.0645161290322581
GO:0031348	BP	GO:0031348	negative regulation of defense response	10/174	272/18903	0.000219598184454231	0.0026379756425521	0.00166373414973705	ARG2/PARP1/NR1H4/PPARA/NR1H3/PPARD/SRC/APCS/MMP12/MAPK14	10	0.0367647058823529
GO:0007611	BP	GO:0007611	learning or memory	10/174	273/18903	0.000226163604903926	0.00270821942126225	0.00170803591339306	HMGCR/INSR/MME/ABL1/MAPK1/PAK6/CASP3/GM2A/SRC/EGFR	10	0.0366300366300366
GO:0070374	BP	GO:0070374	positive regulation of ERK1 and ERK2 cascade	9/174	223/18903	0.000228781992567507	0.00273090403786278	0.00172234278215379	MAP2K1/MIF/ABL1/ERBB4/FGFR2/SRC/FGG/KDR/EGFR	9	0.0403587443946188
GO:0002431	BP	GO:0002431	Fc receptor mediated stimulatory signaling pathway	4/174	33/18903	0.000230380918582482	0.0027326944179029	0.00172347194967365	CSK/ABL1/PTK2/SRC	4	0.121212121212121
GO:2000191	BP	GO:2000191	regulation of fatty acid transport	4/174	33/18903	0.000230380918582482	0.0027326944179029	0.00172347194967365	AKT1/MIF/PPARA/FABP3	4	0.121212121212121
GO:0050679	BP	GO:0050679	positive regulation of epithelial cell proliferation	9/174	224/18903	0.000236503604508418	0.00279283663503066	0.00176140280046026	AKT1/CDC42/HPN/FGFR2/PGF/KDR/EGFR/MMP12/AR	9	0.0401785714285714
GO:0071496	BP	GO:0071496	cellular response to external stimulus	11/174	328/18903	0.000236932058115008	0.00279283663503066	0.00176140280046026	CBS/IGF1R/MAPK8/MAPK1/NR1H4/RXRA/HSPA8/AKR1C3/PPARA/PDK2/ALB	11	0.0335365853658537
GO:0009142	BP	GO:0009142	nucleoside triphosphate biosynthetic process	7/174	134/18903	0.00024421424387152	0.00285713356645639	0.00180195397114234	PARP1/ADK/IMPDH2/IMPDH1/PPARA/DTYMK/PKLR	7	0.0522388059701493
GO:0046456	BP	GO:0046456	icosanoid biosynthetic process	5/174	61/18903	0.000244659104444702	0.00285713356645639	0.00180195397114234	FABP5/MIF/CBR1/CYP2C9/AKR1C3	5	0.0819672131147541
GO:0060135	BP	GO:0060135	maternal process involved in female pregnancy	5/174	61/18903	0.000244659104444702	0.00285713356645639	0.00180195397114234	AKT1/CBS/PARP1/PPARD/AR	5	0.0819672131147541
GO:0051348	BP	GO:0051348	negative regulation of transferase activity	10/174	276/18903	0.000246857195471466	0.00287390537443941	0.00181253171463779	AKT1/HMGCR/KAT2B/CSK/ABL1/PPIA/GSK3B/PTPN1/CASP3/SRC	10	0.036231884057971
GO:0071559	BP	GO:0071559	response to transforming growth factor beta	10/174	277/18903	0.0002540984446702	0.00294839566916908	0.00185951169624438	IGF1R/ABL1/FKBP1A/PARP1/PPARA/FGFR2/TGFB2/PTK2/SRC/FNTA	10	0.036101083032491
GO:0035270	BP	GO:0035270	endocrine system development	7/174	135/18903	0.000255600578955008	0.00294839566916908	0.00185951169624438	AKT1/MAP2K1/INSR/MAPK1/GSK3B/CDK6/RHEB	7	0.0518518518518519
GO:1900180	BP	GO:1900180	regulation of protein localization to nucleus	7/174	135/18903	0.000255600578955008	0.00294839566916908	0.00185951169624438	AKT1/PARP1/CTNNA1/GSK3B/SRC/HSP90AA1/MAPK14	7	0.0518518518518519
GO:0035791	BP	GO:0035791	platelet-derived growth factor receptor-beta signaling pathway	3/174	14/18903	0.000258965707998391	0.00295417046046067	0.00186315377592262	ABL1/PTPN1/SRC	3	0.214285714285714
GO:0046185	BP	GO:0046185	aldehyde catabolic process	3/174	14/18903	0.000258965707998391	0.00295417046046067	0.00186315377592262	ADH5/HAGH/ALDH2	3	0.214285714285714
GO:0070141	BP	GO:0070141	response to UV-A	3/174	14/18903	0.000258965707998391	0.00295417046046067	0.00186315377592262	AKT1/MME/EGFR	3	0.214285714285714
GO:0042558	BP	GO:0042558	pteridine-containing compound metabolic process	4/174	34/18903	0.00025923394019419	0.00295417046046067	0.00186315377592262	FOLH1/ATIC/GART/MTHFD1	4	0.117647058823529
GO:1903050	BP	GO:1903050	regulation of proteolysis involved in protein catabolic process	9/174	227/18903	0.00026097862904759	0.00296509454448045	0.00187004344212921	AKT1/ALAD/CSNK2A1/MDM2/FHIT/GSK3B/PRKACA/PTK2/CDK2	9	0.039647577092511
GO:0048638	BP	GO:0048638	regulation of developmental growth	11/174	332/18903	0.000262857329393531	0.00297433092710255	0.00187586869879214	AKT1/INSR/ABL1/GSK3B/ERBB4/PPARA/FGFR2/PPARD/MAPK14/AR/RTN4R	11	0.0331325301204819
GO:0060038	BP	GO:0060038	cardiac muscle cell proliferation	5/174	62/18903	0.000264157174066637	0.00297433092710255	0.00187586869879214	ABL1/ERBB4/FGFR2/TGFB2/MAPK14	5	0.0806451612903226
GO:1904036	BP	GO:1904036	negative regulation of epithelial cell apoptotic process	5/174	62/18903	0.000264157174066637	0.00297433092710255	0.00187586869879214	IGF1R/ABL1/PPARA/FGG/KDR	5	0.0806451612903226
GO:0043401	BP	GO:0043401	steroid hormone mediated signaling pathway	7/174	136/18903	0.000267410481572474	0.00300200100146242	0.00189331982566977	PARP1/RXRA/PPARA/PPARD/RHOA/SRC/AR	7	0.0514705882352941
GO:0048568	BP	GO:0048568	embryonic organ development	13/174	449/18903	0.000274437667457844	0.0030717474232967	0.00193730791333665	AKT1/ST14/MAP2K1/CDC42/HPN/MAPK1/GRB2/RARB/MTHFD1/FGFR2/TGFB2/KDR/EGFR	13	0.0289532293986637
GO:1904019	BP	GO:1904019	epithelial cell apoptotic process	7/174	137/18903	0.000279655514654744	0.00312088935289259	0.00196830103743296	IGF1R/ABL1/AKR1C3/PPARA/CASP3/FGG/KDR	7	0.0510948905109489
GO:0060562	BP	GO:0060562	epithelial tube morphogenesis	11/174	335/18903	0.000283839832276662	0.00315824143760344	0.00199185847211692	ST14/ABL1/PRKACA/CASP3/MTHFD1/FGFR2/TGFB2/RHOA/SRC/KDR/AR	11	0.0328358208955224
GO:0070542	BP	GO:0070542	response to fatty acid	5/174	63/18903	0.000284812982722016	0.00315974873772777	0.00199280910511379	ALAD/NR1H4/AKR1C3/SRC/PPP5C	5	0.0793650793650794
GO:0014020	BP	GO:0014020	primary neural tube formation	6/174	98/18903	0.000291711890573525	0.0032267954581916	0.00203509452908216	ST14/ABL1/PRKACA/CASP3/MTHFD1/TGFB2	6	0.0612244897959184
GO:0072175	BP	GO:0072175	epithelial tube formation	7/174	139/18903	0.000305498161121392	0.0033598399398893	0.00211900381318017	ST14/ABL1/PRKACA/CASP3/MTHFD1/FGFR2/TGFB2	7	0.0503597122302158
GO:0051893	BP	GO:0051893	regulation of focal adhesion assembly	5/174	64/18903	0.00030667133496075	0.0033598399398893	0.00211900381318017	ABL1/PTK2/RHOA/SRC/KDR	5	0.078125
GO:0090109	BP	GO:0090109	regulation of cell-substrate junction assembly	5/174	64/18903	0.00030667133496075	0.0033598399398893	0.00211900381318017	ABL1/PTK2/RHOA/SRC/KDR	5	0.078125
GO:0006140	BP	GO:0006140	regulation of nucleotide metabolic process	6/174	99/18903	0.000308193165217842	0.0033598399398893	0.00211900381318017	INSR/PARP1/ME2/PDK1/PPARA/PDK2	6	0.0606060606060606
GO:0043279	BP	GO:0043279	response to alkaloid	6/174	99/18903	0.000308193165217842	0.0033598399398893	0.00211900381318017	NQO1/CASP7/CCNA2/CASP3/PPP5C/HSP90AA1	6	0.0606060606060606
GO:0060348	BP	GO:0060348	bone development	9/174	233/18903	0.000316257186233943	0.0034378158688024	0.00216818213526076	CBS/GP1BA/RARB/HSD17B1/FGFR2/RHOA/SRC/KDR/MAPK14	9	0.0386266094420601
GO:0006206	BP	GO:0006206	pyrimidine nucleobase metabolic process	3/174	15/18903	0.000321520630256974	0.00347500234191778	0.00219163512103985	UMPS/MAPK1/DHODH	3	0.2
GO:0042559	BP	GO:0042559	pteridine-containing compound biosynthetic process	3/174	15/18903	0.000321520630256974	0.00347500234191778	0.00219163512103985	ATIC/GART/MTHFD1	3	0.2
GO:0033687	BP	GO:0033687	osteoblast proliferation	4/174	36/18903	0.000324585194474068	0.00348691420007605	0.0021991477625082	IGF1R/ABL1/FGFR2/RHOA	4	0.111111111111111
GO:0046320	BP	GO:0046320	regulation of fatty acid oxidation	4/174	36/18903	0.000324585194474068	0.00348691420007605	0.0021991477625082	AKT1/PPARA/PPARD/FABP3	4	0.111111111111111
GO:0001776	BP	GO:0001776	leukocyte homeostasis	6/174	100/18903	0.000325396022912717	0.00348691420007605	0.0021991477625082	AKT1/MIF/PDE4B/ABL1/CASP3/MTHFD1	6	0.06
GO:0043405	BP	GO:0043405	regulation of MAP kinase activity	8/174	186/18903	0.0003336984096652	0.00356575184492106	0.00224886955671195	HMGCR/MIF/INSR/CBS/CSK/PTPN1/SRC/EGFR	8	0.043010752688172
GO:0015908	BP	GO:0015908	fatty acid transport	6/174	101/18903	0.000343342501394259	0.00363788740241333	0.0022943644386488	AKT1/FABP5/MIF/PPARA/PPARD/FABP3	6	0.0594059405940594
GO:0021549	BP	GO:0021549	cerebellum development	6/174	101/18903	0.000343342501394259	0.00363788740241333	0.0022943644386488	MAP2K1/CBS/IGF1R/ABL1/ATIC/GART	6	0.0594059405940594
GO:2001243	BP	GO:2001243	negative regulation of intrinsic apoptotic signaling pathway	6/174	101/18903	0.000343342501394259	0.00363788740241333	0.0022943644386488	AKT1/MIF/PPIA/MDM2/PTPN1/SRC	6	0.0594059405940594
GO:0010923	BP	GO:0010923	negative regulation of phosphatase activity	4/174	37/18903	0.000361332289698075	0.00380409861370714	0.00239919151280296	LGALS3/FKBP1A/GSK3B/TGFB2	4	0.108108108108108
GO:0035883	BP	GO:0035883	enteroendocrine cell differentiation	4/174	37/18903	0.000361332289698075	0.00380409861370714	0.00239919151280296	AKT1/GSK3B/CDK6/RHEB	4	0.108108108108108
GO:0060419	BP	GO:0060419	heart growth	6/174	102/18903	0.000362054984708606	0.00380409861370714	0.00239919151280296	ABL1/ERBB4/PPARA/FGFR2/TGFB2/MAPK14	6	0.0588235294117647
GO:0051896	BP	GO:0051896	regulation of protein kinase B signaling	8/174	189/18903	0.000371463405206619	0.00389211101233157	0.00245469969522503	INSR/IGF1R/AKR1C3/PPARA/PTK2/SRC/EGFR/HSP90AA1	8	0.0423280423280423
GO:0030177	BP	GO:0030177	positive regulation of Wnt signaling pathway	7/174	144/18903	0.000378565068267453	0.00395553306788043	0.00249469909399167	XIAP/ABL1/CSNK2A1/FGFR2/CSNK1G2/SRC/EGFR	7	0.0486111111111111
GO:0070613	BP	GO:0070613	regulation of protein processing	5/174	67/18903	0.000379920364933574	0.00395872822245702	0.00249671423306158	HPN/XIAP/PRKACA/SRC/PLAU	5	0.0746268656716418
GO:0060193	BP	GO:0060193	positive regulation of lipase activity	5/174	68/18903	0.000407051052480019	0.00422974261695491	0.00266763920140595	FGFR2/SELE/NR1H3/RHOA/EGFR	5	0.0735294117647059
GO:0071868	BP	GO:0071868	cellular response to monoamine stimulus	6/174	105/18903	0.000423017450432151	0.00435962246729529	0.00274955259699932	PDE4B/ABL1/MAPK1/GSK3B/PRKACA/PKLR	6	0.0571428571428571
GO:0071870	BP	GO:0071870	cellular response to catecholamine stimulus	6/174	105/18903	0.000423017450432151	0.00435962246729529	0.00274955259699932	PDE4B/ABL1/MAPK1/GSK3B/PRKACA/PKLR	6	0.0571428571428571
GO:1901655	BP	GO:1901655	cellular response to ketone	6/174	105/18903	0.000423017450432151	0.00435962246729529	0.00274955259699932	AKT1/EIF4E/IGF1R/AKR1C3/SRC/AR	6	0.0571428571428571
GO:0048872	BP	GO:0048872	homeostasis of number of cells	10/174	296/18903	0.000429487251928495	0.00441423954843129	0.00278399882219532	AKT1/MIF/PDE4B/XIAP/ABL1/CDK6/STAT1/CASP3/MTHFD1/MAPK14	10	0.0337837837837838
GO:0150116	BP	GO:0150116	regulation of cell-substrate junction organization	5/174	69/18903	0.00043561875898922	0.0044650922796395	0.0028160709248159	ABL1/PTK2/RHOA/SRC/KDR	5	0.072463768115942
GO:0032570	BP	GO:0032570	response to progesterone	4/174	39/18903	0.000443599637670746	0.00450385103001733	0.00284051552375933	IGF1R/TGFB2/NR1H3/SRC	4	0.102564102564103
GO:0042401	BP	GO:0042401	cellular biogenic amine biosynthetic process	4/174	39/18903	0.000443599637670746	0.00450385103001733	0.00284051552375933	AMD1/ALDH2/TGFB2/SRM	4	0.102564102564103
GO:1901661	BP	GO:1901661	quinone metabolic process	4/174	39/18903	0.000443599637670746	0.00450385103001733	0.00284051552375933	NQO1/CBR1/AKR1C3/NQO2	4	0.102564102564103
GO:0001841	BP	GO:0001841	neural tube formation	6/174	106/18903	0.00044502463799007	0.00450385103001733	0.00284051552375933	ST14/ABL1/PRKACA/CASP3/MTHFD1/TGFB2	6	0.0566037735849057
GO:0002687	BP	GO:0002687	positive regulation of leukocyte migration	7/174	148/18903	0.000446564232562694	0.00450385103001733	0.00284051552375933	ABL1/LGALS3/MAPK1/PTK2/PGF/RHOA/SELP	7	0.0472972972972973
GO:0032147	BP	GO:0032147	activation of protein kinase activity	7/174	148/18903	0.000446564232562694	0.00450385103001733	0.00284051552375933	MAP2K1/INSR/ABL1/PPIA/TGFB2/SRC/EGFR	7	0.0472972972972973
GO:0032872	BP	GO:0032872	regulation of stress-activated MAPK cascade	8/174	195/18903	0.000457454899934746	0.00460138635347696	0.00290202968098955	MAP2K1/XIAP/IGF1R/PPIA/MAPK1/MMP8/TGFB2/EGFR	8	0.041025641025641
GO:0009411	BP	GO:0009411	response to UV	7/174	149/18903	0.00046500100632264	0.00466485052087499	0.00294205563910741	AKT1/MME/PARP1/MAPK8/CASP7/CASP3/EGFR	7	0.0469798657718121
GO:0000097	BP	GO:0000097	sulfur amino acid biosynthetic process	3/174	17/18903	0.000474049030621824	0.00473045752250137	0.0029834330526464	CBS/MTHFD1/MTAP	3	0.176470588235294
GO:1903236	BP	GO:1903236	regulation of leukocyte tethering or rolling	3/174	17/18903	0.000474049030621824	0.00473045752250137	0.0029834330526464	GP1BA/SELE/SELP	3	0.176470588235294
GO:0030010	BP	GO:0030010	establishment of cell polarity	7/174	150/18903	0.000484040287366474	0.00481741415289272	0.00303827537688718	CDC42/IGF1R/ABL1/GSK3B/PTK2/RHOA/HSP90AA1	7	0.0466666666666667
GO:0009309	BP	GO:0009309	amine biosynthetic process	4/174	40/18903	0.000489374754368597	0.00481750563463861	0.00303833307313816	AMD1/ALDH2/TGFB2/SRM	4	0.1
GO:0048246	BP	GO:0048246	macrophage chemotaxis	4/174	40/18903	0.000489374754368597	0.00481750563463861	0.00303833307313816	MIF/LGALS3/MAPK1/PTK2	4	0.1
GO:1904994	BP	GO:1904994	regulation of leukocyte adhesion to vascular endothelial cell	4/174	40/18903	0.000489374754368597	0.00481750563463861	0.00303833307313816	GP1BA/SELE/RHOA/SELP	4	0.1
GO:0044106	BP	GO:0044106	cellular amine metabolic process	6/174	108/18903	0.000491712531637292	0.00481750563463861	0.00303833307313816	AMD1/NR1H4/ALDH2/TGFB2/SRM/GCDH	6	0.0555555555555556
GO:0071867	BP	GO:0071867	response to monoamine	6/174	108/18903	0.000491712531637292	0.00481750563463861	0.00303833307313816	PDE4B/ABL1/MAPK1/GSK3B/PRKACA/PKLR	6	0.0555555555555556
GO:0071869	BP	GO:0071869	response to catecholamine	6/174	108/18903	0.000491712531637292	0.00481750563463861	0.00303833307313816	PDE4B/ABL1/MAPK1/GSK3B/PRKACA/PKLR	6	0.0555555555555556
GO:0070527	BP	GO:0070527	platelet aggregation	5/174	71/18903	0.000497261360292733	0.00484114937139041	0.00305324484549376	CLIC1/PPIA/GP1BA/FGG/CTSG	5	0.0704225352112676
GO:2000379	BP	GO:2000379	positive regulation of reactive oxygen species metabolic process	5/174	71/18903	0.000497261360292733	0.00484114937139041	0.00305324484549376	CBR1/GRB2/AKR1C3/MMP8/MAPK14	5	0.0704225352112676
GO:0048863	BP	GO:0048863	stem cell differentiation	9/174	248/18903	0.000497976128340265	0.00484114937139041	0.00305324484549376	CDC42/ABL1/MAPK1/GSK3B/ERBB4/CDK6/FGFR2/TGFB2/MAPK14	9	0.0362903225806452
GO:0070302	BP	GO:0070302	regulation of stress-activated protein kinase signaling cascade	8/174	198/18903	0.000506144805392144	0.00490791312580763	0.00309535180675482	MAP2K1/XIAP/IGF1R/PPIA/MAPK1/MMP8/TGFB2/EGFR	8	0.0404040404040404
GO:1903317	BP	GO:1903317	regulation of protein maturation	5/174	72/18903	0.00053043586275286	0.0051302668571892	0.0032355871790053	HPN/XIAP/PRKACA/SRC/PLAU	5	0.0694444444444444
GO:0009069	BP	GO:0009069	serine family amino acid metabolic process	4/174	41/18903	0.000538415376231384	0.00519412480599688	0.00327586148952195	CBS/GART/MTHFD1/SDS	4	0.0975609756097561
GO:1904035	BP	GO:1904035	regulation of epithelial cell apoptotic process	6/174	110/18903	0.000542129486186806	0.00521661332116488	0.00329004467986623	IGF1R/ABL1/AKR1C3/PPARA/FGG/KDR	6	0.0545454545454545
GO:0001558	BP	GO:0001558	regulation of cell growth	12/174	422/18903	0.000553437901081721	0.00531187725923728	0.00335012630626674	AKT1/CDC42/HPN/ABL1/CSNK2A1/GSK3B/PPARA/TGFB2/PPARD/RHOA/EGFR/RTN4R	12	0.028436018957346
GO:0048762	BP	GO:0048762	mesenchymal cell differentiation	9/174	252/18903	0.000558753603701465	0.00531486398476793	0.00335200999206774	CDC42/HPN/MAPK1/GSK3B/ERBB4/STAT1/FGFR2/TGFB2/PTK2	9	0.0357142857142857
GO:0006085	BP	GO:0006085	acetyl-CoA biosynthetic process	3/174	18/18903	0.00056502133030009	0.00531486398476793	0.00335200999206774	ACAT1/PDK1/PDK2	3	0.166666666666667
GO:0015936	BP	GO:0015936	coenzyme A metabolic process	3/174	18/18903	0.00056502133030009	0.00531486398476793	0.00335200999206774	HMGCR/ACAT1/PPCDC	3	0.166666666666667
GO:0038128	BP	GO:0038128	ERBB2 signaling pathway	3/174	18/18903	0.00056502133030009	0.00531486398476793	0.00335200999206774	ERBB4/SRC/EGFR	3	0.166666666666667
GO:0046653	BP	GO:0046653	tetrahydrofolate metabolic process	3/174	18/18903	0.00056502133030009	0.00531486398476793	0.00335200999206774	ATIC/GART/MTHFD1	3	0.166666666666667
GO:0051900	BP	GO:0051900	regulation of mitochondrial depolarization	3/174	18/18903	0.00056502133030009	0.00531486398476793	0.00335200999206774	PARP1/SRC/KDR	3	0.166666666666667
GO:0086103	BP	GO:0086103	G protein-coupled receptor signaling pathway involved in heart process	3/174	18/18903	0.00056502133030009	0.00531486398476793	0.00335200999206774	PDE4B/CDC42/SRC	3	0.166666666666667
GO:2000641	BP	GO:2000641	regulation of early endosome to late endosome transport	3/174	18/18903	0.00056502133030009	0.00531486398476793	0.00335200999206774	MAP2K1/MAPK1/SRC	3	0.166666666666667
GO:0022037	BP	GO:0022037	metencephalon development	6/174	111/18903	0.000568799217487059	0.00532384776268285	0.00335767593449328	MAP2K1/CBS/IGF1R/ABL1/ATIC/GART	6	0.0540540540540541
GO:0034446	BP	GO:0034446	substrate adhesion-dependent cell spreading	6/174	111/18903	0.000568799217487059	0.00532384776268285	0.00335767593449328	CDC42/ABL1/PTK2/RHOA/SRC/FGG	6	0.0540540540540541
GO:0035148	BP	GO:0035148	tube formation	7/174	155/18903	0.000588777139013209	0.00547589429986186	0.00345356954782826	ST14/ABL1/PRKACA/CASP3/MTHFD1/FGFR2/TGFB2	7	0.0451612903225806
GO:2001236	BP	GO:2001236	regulation of extrinsic apoptotic signaling pathway	7/174	155/18903	0.000588777139013209	0.00547589429986186	0.00345356954782826	AKT1/LGALS3/CTNNA1/GSK3B/SRC/FGG/AR	7	0.0451612903225806
GO:0045022	BP	GO:0045022	early endosome to late endosome transport	4/174	42/18903	0.000590850737021149	0.00547589429986186	0.00345356954782826	MAP2K1/RAB5A/MAPK1/SRC	4	0.0952380952380952
GO:0045429	BP	GO:0045429	positive regulation of nitric oxide biosynthetic process	4/174	42/18903	0.000590850737021149	0.00547589429986186	0.00345356954782826	AKT1/INSR/MMP8/HSP90AA1	4	0.0952380952380952
GO:0010631	BP	GO:0010631	epithelial cell migration	11/174	366/18903	0.000596880072953941	0.00551821479211339	0.00348026048729594	DPP4/AKT1/RAB11A/ABL1/TGFB2/PTK2/PPARD/RHOA/SRC/EPHB4/KDR	11	0.0300546448087432
GO:0019439	BP	GO:0019439	aromatic compound catabolic process	13/174	489/18903	0.000614865123353748	0.00565943288779406	0.00356932475481793	EPHX2/AKT1/BLVRB/AHCY/GSTZ1/PDE4B/ACAT1/FHIT/HINT1/ISG20/PNP/RNASE3/MAPK14	13	0.0265848670756646
GO:0042063	BP	GO:0042063	gliogenesis	10/174	310/18903	0.000615155748673267	0.00565943288779406	0.00356932475481793	AKT1/MAP2K1/CSK/ABL1/MAPK1/HEXB/CDK6/RHEB/TGFB2/RHOA	10	0.032258064516129
GO:0090132	BP	GO:0090132	epithelium migration	11/174	369/18903	0.000638499229212236	0.00585925469381823	0.00369534955852799	DPP4/AKT1/RAB11A/ABL1/TGFB2/PTK2/PPARD/RHOA/SRC/EPHB4/KDR	11	0.029810298102981
GO:0005977	BP	GO:0005977	glycogen metabolic process	5/174	75/18903	0.000639982220003476	0.00585925469381823	0.00369534955852799	AKT1/INSR/ACADM/GSK3B/PYGL	5	0.0666666666666667
GO:0009154	BP	GO:0009154	purine ribonucleotide catabolic process	4/174	43/18903	0.000646810615970794	0.00586483087365826	0.00369886637675606	PDE4B/ACAT1/HINT1/PNP	4	0.0930232558139535
GO:0033574	BP	GO:0033574	response to testosterone	4/174	43/18903	0.000646810615970794	0.00586483087365826	0.00369886637675606	NQO1/IGF1R/MTAP/AR	4	0.0930232558139535
GO:0060428	BP	GO:0060428	lung epithelium development	4/174	43/18903	0.000646810615970794	0.00586483087365826	0.00369886637675606	MAP2K1/CDC42/THRB/FGFR2	4	0.0930232558139535
GO:1900371	BP	GO:1900371	regulation of purine nucleotide biosynthetic process	4/174	43/18903	0.000646810615970794	0.00586483087365826	0.00369886637675606	PARP1/PDK1/PPARA/PDK2	4	0.0930232558139535
GO:0001667	BP	GO:0001667	ameboidal-type cell migration	13/174	492/18903	0.000650748875067717	0.00588639030396985	0.00371246360634366	DPP4/AKT1/RAB11A/CDC42/ABL1/ERBB4/TGFB2/PTK2/PPARD/RHOA/SRC/EPHB4/KDR	13	0.0264227642276423
GO:0071674	BP	GO:0071674	mononuclear cell migration	8/174	206/18903	0.00065682350720855	0.00592712504591064	0.00373815443538485	AKT1/CDC42/ABL1/LGALS3/MAPK1/PTK2/RHOA/CTSG	8	0.0388349514563107
GO:0097530	BP	GO:0097530	granulocyte migration	7/174	158/18903	0.000659785352628659	0.00593964284037065	0.00374604923235968	DPP4/PDE4B/LGALS3/PPIA/MAPK1/TGFB2/PTK2	7	0.0443037974683544
GO:0060485	BP	GO:0060485	mesenchyme development	10/174	313/18903	0.000662535343028417	0.00595019836643616	0.00375270645424617	CDC42/HPN/MDM2/MAPK1/GSK3B/ERBB4/STAT1/FGFR2/TGFB2/PTK2	10	0.0319488817891374
GO:0010885	BP	GO:0010885	regulation of cholesterol storage	3/174	19/18903	0.000666438463908851	0.00595688598546015	0.00375692424154154	PPARA/NR1H3/PPARD	3	0.157894736842105
GO:0099563	BP	GO:0099563	modification of synaptic structure	3/174	19/18903	0.000666438463908851	0.00595688598546015	0.00375692424154154	CDC42/ABL1/RHOA	3	0.157894736842105
GO:0050890	BP	GO:0050890	cognition	10/174	314/18903	0.000678983213492847	0.00601610484723356	0.00379427274508786	HMGCR/INSR/MME/ABL1/MAPK1/PAK6/CASP3/GM2A/SRC/EGFR	10	0.0318471337579618
GO:0006073	BP	GO:0006073	cellular glucan metabolic process	5/174	76/18903	0.000680011365499386	0.00601610484723356	0.00379427274508786	AKT1/INSR/ACADM/GSK3B/PYGL	5	0.0657894736842105
GO:0009166	BP	GO:0009166	nucleotide catabolic process	5/174	76/18903	0.000680011365499386	0.00601610484723356	0.00379427274508786	PDE4B/ACAT1/FHIT/HINT1/PNP	5	0.0657894736842105
GO:0044042	BP	GO:0044042	glucan metabolic process	5/174	76/18903	0.000680011365499386	0.00601610484723356	0.00379427274508786	AKT1/INSR/ACADM/GSK3B/PYGL	5	0.0657894736842105
GO:0035051	BP	GO:0035051	cardiocyte differentiation	7/174	159/18903	0.000684907466675844	0.00601610484723356	0.00379427274508786	CDC42/ACADM/MAPK1/PPARA/RARB/TGFB2/EGFR	7	0.0440251572327044
GO:0036294	BP	GO:0036294	cellular response to decreased oxygen levels	7/174	159/18903	0.000684907466675844	0.00601610484723356	0.00379427274508786	AKT1/CBS/MDM2/PDK1/CCNA2/PPARD/SRC	7	0.0440251572327044
GO:0033559	BP	GO:0033559	unsaturated fatty acid metabolic process	6/174	115/18903	0.000685823193083359	0.00601610484723356	0.00379427274508786	FABP5/MIF/CBR1/CYP2C9/CES2/AKR1C3	6	0.0521739130434783
GO:1990748	BP	GO:1990748	cellular detoxification	6/174	115/18903	0.000685823193083359	0.00601610484723356	0.00379427274508786	NQO1/ADH5/GSTZ1/GSR/ALB/GSTO1	6	0.0521739130434783
GO:0090068	BP	GO:0090068	positive regulation of cell cycle process	9/174	260/18903	0.000698610103848685	0.0060948624713576	0.00384394407134793	AKT1/RAB11A/CDC42/INSR/KAT2B/IGF1R/MDM2/RHOA/EGFR	9	0.0346153846153846
GO:0019722	BP	GO:0019722	calcium-mediated signaling	8/174	208/18903	0.00069964884679158	0.0060948624713576	0.00384394407134793	GSK3B/HINT1/PRKACA/SELE/PDK2/SELP/KDR/GSTO1	8	0.0384615384615385
GO:0045216	BP	GO:0045216	cell-cell junction organization	8/174	208/18903	0.00069964884679158	0.0060948624713576	0.00384394407134793	CDC42/CSK/CTNNA1/NR1H4/PRKACA/TGFB2/RHOA/SRC	8	0.0384615384615385
GO:0030808	BP	GO:0030808	regulation of nucleotide biosynthetic process	4/174	44/18903	0.000706425244702849	0.00612560005291757	0.00386332983188975	PARP1/PDK1/PPARA/PDK2	4	0.0909090909090909
GO:1904407	BP	GO:1904407	positive regulation of nitric oxide metabolic process	4/174	44/18903	0.000706425244702849	0.00612560005291757	0.00386332983188975	AKT1/INSR/MMP8/HSP90AA1	4	0.0909090909090909
GO:0090130	BP	GO:0090130	tissue migration	11/174	374/18903	0.000713235990725798	0.00617047283719658	0.00389163046605578	DPP4/AKT1/RAB11A/ABL1/TGFB2/PTK2/PPARD/RHOA/SRC/EPHB4/KDR	11	0.0294117647058824
GO:0003015	BP	GO:0003015	heart process	9/174	261/18903	0.000717941748664537	0.00619697088320969	0.00390834241113297	PDE4B/CDC42/THRB/MDM2/PRKACA/TGFB2/SRC/GSTO1/HSP90AA1	9	0.0344827586206897
GO:1901616	BP	GO:1901616	organic hydroxy compound catabolic process	5/174	77/18903	0.000721885069743858	0.0062167819248261	0.00392083695655159	SORD/IMPA1/ALDH2/AKR1C3/TPI1	5	0.0649350649350649
GO:0009308	BP	GO:0009308	amine metabolic process	6/174	117/18903	0.000750914000353114	0.00643738093029988	0.0040599656478422	AMD1/NR1H4/ALDH2/TGFB2/SRM/GCDH	6	0.0512820512820513
GO:0043406	BP	GO:0043406	positive regulation of MAP kinase activity	6/174	117/18903	0.000750914000353114	0.00643738093029988	0.0040599656478422	MIF/INSR/CSK/PTPN1/SRC/EGFR	6	0.0512820512820513
GO:0034637	BP	GO:0034637	cellular carbohydrate biosynthetic process	5/174	78/18903	0.000765656728370195	0.00643853817703975	0.00406069550709099	AKT1/INSR/IMPA1/ACADM/GSK3B	5	0.0641025641025641
GO:0045913	BP	GO:0045913	positive regulation of carbohydrate metabolic process	5/174	78/18903	0.000765656728370195	0.00643853817703975	0.00406069550709099	AKT1/INSR/KAT2B/PPARA/SRC	5	0.0641025641025641
GO:0019058	BP	GO:0019058	viral life cycle	10/174	319/18903	0.000766367668599719	0.00643853817703975	0.00406069550709099	DPP4/INSR/PPIA/HSPA8/ISG20/PPARA/DDX6/CD209/EGFR/APCS	10	0.0313479623824451
GO:0005978	BP	GO:0005978	glycogen biosynthetic process	4/174	45/18903	0.000769825216819971	0.00643853817703975	0.00406069550709099	AKT1/INSR/ACADM/GSK3B	4	0.0888888888888889
GO:0008631	BP	GO:0008631	intrinsic apoptotic signaling pathway in response to oxidative stress	4/174	45/18903	0.000769825216819971	0.00643853817703975	0.00406069550709099	AKT1/PPIA/PARP1/PDK1	4	0.0888888888888889
GO:0009250	BP	GO:0009250	glucan biosynthetic process	4/174	45/18903	0.000769825216819971	0.00643853817703975	0.00406069550709099	AKT1/INSR/ACADM/GSK3B	4	0.0888888888888889
GO:0031295	BP	GO:0031295	T cell costimulation	4/174	45/18903	0.000769825216819971	0.00643853817703975	0.00406069550709099	DPP4/AKT1/CSK/SRC	4	0.0888888888888889
GO:0035384	BP	GO:0035384	thioester biosynthetic process	4/174	45/18903	0.000769825216819971	0.00643853817703975	0.00406069550709099	ACAT1/PDK1/PDK2/GCDH	4	0.0888888888888889
GO:0071616	BP	GO:0071616	acyl-CoA biosynthetic process	4/174	45/18903	0.000769825216819971	0.00643853817703975	0.00406069550709099	ACAT1/PDK1/PDK2/GCDH	4	0.0888888888888889
GO:0098927	BP	GO:0098927	vesicle-mediated transport between endosomal compartments	4/174	45/18903	0.000769825216819971	0.00643853817703975	0.00406069550709099	MAP2K1/RAB5A/MAPK1/SRC	4	0.0888888888888889
GO:1904646	BP	GO:1904646	cellular response to amyloid-beta	4/174	45/18903	0.000769825216819971	0.00643853817703975	0.00406069550709099	IGF1R/PARP1/GSK3B/BACE1	4	0.0888888888888889
GO:0010288	BP	GO:0010288	response to lead ion	3/174	20/18903	0.00077876062148761	0.00649886076161784	0.00409874011309268	ALAD/BACE1/PPP5C	3	0.15
GO:0009145	BP	GO:0009145	purine nucleoside triphosphate biosynthetic process	6/174	118/18903	0.000785199176118327	0.00652372531347649	0.0041144218363724	PARP1/ADK/IMPDH2/IMPDH1/PPARA/PKLR	6	0.0508474576271186
GO:0043200	BP	GO:0043200	response to amino acid	6/174	118/18903	0.000785199176118327	0.00652372531347649	0.0041144218363724	NQO1/IGF1R/ALAD/CASP3/RHOA/EGFR	6	0.0508474576271186
GO:0072524	BP	GO:0072524	pyridine-containing compound metabolic process	5/174	79/18903	0.000811380224971161	0.00672643122767301	0.00424226560655829	NQO1/ME2/PNPO/NMNAT1/PNP	5	0.0632911392405063
GO:0035272	BP	GO:0035272	exocrine system development	4/174	46/18903	0.000837141400114182	0.00690962223464047	0.00435780159912024	INSR/FGFR2/TGFB2/EGFR	4	0.0869565217391304
GO:0044788	BP	GO:0044788	modulation by host of viral process	4/174	46/18903	0.000837141400114182	0.00690962223464047	0.00435780159912024	CDC42/RAB5A/HSPA8/APCS	4	0.0869565217391304
GO:0006720	BP	GO:0006720	isoprenoid metabolic process	6/174	121/18903	0.000895348561669738	0.00737391872187391	0.00465062686594716	HMGCR/ADH5/FDPS/CYP2C9/AKR1C3/PPARD	6	0.0495867768595041
GO:0010878	BP	GO:0010878	cholesterol storage	3/174	21/18903	0.000902432837685233	0.00740469345400346	0.0046700360568309	PPARA/NR1H3/PPARD	3	0.142857142857143
GO:0031018	BP	GO:0031018	endocrine pancreas development	4/174	47/18903	0.000908504851342671	0.00740469345400346	0.0046700360568309	AKT1/GSK3B/CDK6/RHEB	4	0.0851063829787234
GO:0031294	BP	GO:0031294	lymphocyte costimulation	4/174	47/18903	0.000908504851342671	0.00740469345400346	0.0046700360568309	DPP4/AKT1/CSK/SRC	4	0.0851063829787234
GO:0070849	BP	GO:0070849	response to epidermal growth factor	4/174	47/18903	0.000908504851342671	0.00740469345400346	0.0046700360568309	AKT1/MAPK1/ERBB4/EGFR	4	0.0851063829787234
GO:0072332	BP	GO:0072332	intrinsic apoptotic signaling pathway by p53 class mediator	5/174	81/18903	0.000908900601591624	0.00740469345400346	0.0046700360568309	MIF/MDM2/FHIT/HINT1/PDK2	5	0.0617283950617284
GO:0030307	BP	GO:0030307	positive regulation of cell growth	7/174	167/18903	0.000914343546390966	0.00743298245040242	0.00468787752913698	AKT1/CDC42/HPN/CSNK2A1/TGFB2/RHOA/EGFR	7	0.0419161676646707
GO:0046034	BP	GO:0046034	ATP metabolic process	8/174	217/18903	0.000921112698651897	0.00747190774046227	0.00471242716231644	INSR/HK1/PARP1/HSPA8/NMNAT1/PPARA/TPI1/PKLR	8	0.0368663594470046
GO:0071901	BP	GO:0071901	negative regulation of protein serine/threonine kinase activity	6/174	122/18903	0.000934590964031393	0.00756497235263179	0.00477112170479094	AKT1/HMGCR/KAT2B/ABL1/PTPN1/CASP3	6	0.0491803278688525
GO:0043523	BP	GO:0043523	regulation of neuron apoptotic process	8/174	218/18903	0.000948841010609647	0.0076474963504692	0.00482316842999955	NQO1/ABL1/PARP1/CASP3/TGFB2/RHOA/BACE1/KDR	8	0.036697247706422
GO:0044706	BP	GO:0044706	multi-multicellular organism process	8/174	218/18903	0.000948841010609647	0.0076474963504692	0.00482316842999955	AKT1/CBS/UMPS/PARP1/HEXB/PPARD/PGF/AR	8	0.036697247706422
GO:0031016	BP	GO:0031016	pancreas development	5/174	82/18903	0.000960807531347271	0.00772743285339426	0.00487358325854524	AKT1/INSR/GSK3B/CDK6/RHEB	5	0.0609756097560976
GO:0022612	BP	GO:0022612	gland morphogenesis	6/174	123/18903	0.000975144359233586	0.00779289093862094	0.0049148667526046	HPN/FGFR2/TGFB2/SRC/EGFR/AR	6	0.0487804878048781
GO:0071675	BP	GO:0071675	regulation of mononuclear cell migration	6/174	123/18903	0.000975144359233586	0.00779289093862094	0.0049148667526046	AKT1/ABL1/LGALS3/MAPK1/PTK2/RHOA	6	0.0487804878048781
GO:0097237	BP	GO:0097237	cellular response to toxic substance	6/174	123/18903	0.000975144359233586	0.00779289093862094	0.0049148667526046	NQO1/ADH5/GSTZ1/GSR/ALB/GSTO1	6	0.0487804878048781
GO:0006195	BP	GO:0006195	purine nucleotide catabolic process	4/174	48/18903	0.000984046733518842	0.00783085290893053	0.00493880883356114	PDE4B/ACAT1/HINT1/PNP	4	0.0833333333333333
GO:0035305	BP	GO:0035305	negative regulation of dephosphorylation	4/174	48/18903	0.000984046733518842	0.00783085290893053	0.00493880883356114	LGALS3/FKBP1A/GSK3B/TGFB2	4	0.0833333333333333
GO:0007178	BP	GO:0007178	transmembrane receptor protein serine/threonine kinase signaling pathway	11/174	390/18903	0.00100301468992491	0.00796499244294051	0.00502340875175687	XIAP/ABL1/FKBP1A/PARP1/PPARA/TGFB2/PTK2/SRC/KDR/FNTA/MAPK14	11	0.0282051282051282
GO:2000058	BP	GO:2000058	regulation of ubiquitin-dependent protein catabolic process	7/174	170/18903	0.00101452822024121	0.00802547455481998	0.0050615539693847	AKT1/CSNK2A1/MDM2/FHIT/GSK3B/PTK2/CDK2	7	0.0411764705882353
GO:0006096	BP	GO:0006096	glycolytic process	5/174	83/18903	0.00101488636337464	0.00802547455481998	0.0050615539693847	INSR/HK1/PPARA/TPI1/PKLR	5	0.0602409638554217
GO:0009895	BP	GO:0009895	negative regulation of catabolic process	10/174	332/18903	0.00103778369595206	0.00813909205641006	0.00513321093025806	AKT1/HMGCR/NQO1/ALAD/CSNK2A1/FHIT/PPARA/EGFR/PDE3B/MAPK14	10	0.0301204819277108
GO:0010888	BP	GO:0010888	negative regulation of lipid storage	3/174	22/18903	0.00103788528078824	0.00813909205641006	0.00513321093025806	PPARA/NR1H3/PPARD	3	0.136363636363636
GO:0035584	BP	GO:0035584	calcium-mediated signaling using intracellular calcium source	3/174	22/18903	0.00103788528078824	0.00813909205641006	0.00513321093025806	PRKACA/SELP/KDR	3	0.136363636363636
GO:0060713	BP	GO:0060713	labyrinthine layer morphogenesis	3/174	22/18903	0.00103788528078824	0.00813909205641006	0.00513321093025806	ST14/GRB2/FGFR2	3	0.136363636363636
GO:0010811	BP	GO:0010811	positive regulation of cell-substrate adhesion	6/174	125/18903	0.00106030127946246	0.00827427658750597	0.00521846991342398	CDC42/ABL1/GSK3B/CDK6/FGG/KDR	6	0.048
GO:0009261	BP	GO:0009261	ribonucleotide catabolic process	4/174	49/18903	0.00106389823566819	0.00827427658750597	0.00521846991342398	PDE4B/ACAT1/HINT1/PNP	4	0.0816326530612245
GO:0035094	BP	GO:0035094	response to nicotine	4/174	49/18903	0.00106389823566819	0.00827427658750597	0.00521846991342398	IGF1R/MAPK1/PPARA/CASP3	4	0.0816326530612245
GO:1903426	BP	GO:1903426	regulation of reactive oxygen species biosynthetic process	4/174	49/18903	0.00106389823566819	0.00827427658750597	0.00521846991342398	ARG2/MMP8/PPARA/RHOA	4	0.0816326530612245
GO:0006757	BP	GO:0006757	ATP generation from ADP	5/174	84/18903	0.00107119315831391	0.0083138695332512	0.00524344062765745	INSR/HK1/PPARA/TPI1/PKLR	5	0.0595238095238095
GO:0016055	BP	GO:0016055	Wnt signaling pathway	12/174	456/18903	0.00108480787681791	0.00839408829994566	0.00529403347599408	CDC42/XIAP/ABL1/CSNK2A1/RAB5A/GSK3B/FGFR2/CSNK1G2/RHOA/SRC/EGFR/MAPK14	12	0.0263157894736842
GO:2001242	BP	GO:2001242	regulation of intrinsic apoptotic signaling pathway	7/174	172/18903	0.00108597961038534	0.00839408829994566	0.00529403347599408	AKT1/MIF/PPIA/PARP1/MDM2/PTPN1/SRC	7	0.0406976744186047
GO:0006690	BP	GO:0006690	icosanoid metabolic process	6/174	126/18903	0.00110496403935284	0.00852336269210413	0.00537556501762441	FABP5/MIF/CBR1/CYP2C9/CES2/AKR1C3	6	0.0476190476190476
GO:0198738	BP	GO:0198738	cell-cell signaling by wnt	12/174	458/18903	0.00112610507291555	0.00864411075737949	0.00545171912476353	CDC42/XIAP/ABL1/CSNK2A1/RAB5A/GSK3B/FGFR2/CSNK1G2/RHOA/SRC/EGFR/MAPK14	12	0.0262008733624454
GO:0097191	BP	GO:0097191	extrinsic apoptotic signaling pathway	8/174	224/18903	0.00112959192607748	0.00864411075737949	0.00545171912476353	AKT1/LGALS3/CTNNA1/GSK3B/TGFB2/SRC/FGG/AR	8	0.0357142857142857
GO:0048041	BP	GO:0048041	focal adhesion assembly	5/174	85/18903	0.00112978435932876	0.00864411075737949	0.00545171912476353	ABL1/PTK2/RHOA/SRC/KDR	5	0.0588235294117647
GO:1901292	BP	GO:1901292	nucleoside phosphate catabolic process	5/174	85/18903	0.00112978435932876	0.00864411075737949	0.00545171912476353	PDE4B/ACAT1/FHIT/HINT1/PNP	5	0.0588235294117647
GO:0032386	BP	GO:0032386	regulation of intracellular transport	10/174	336/18903	0.00113559561989144	0.0086709851786043	0.00546866844439519	MAP2K1/MAPK8/MAPK1/GSK3B/PTPN1/PRKACA/SRC/ARHGAP1/HSP90AA1/MAPK14	10	0.0297619047619048
GO:0045737	BP	GO:0045737	positive regulation of cyclin-dependent protein serine/threonine kinase activity	4/174	50/18903	0.00114819049499934	0.00874944352957069	0.00551815102328229	AKT1/CCNT1/SRC/EGFR	4	0.08
GO:0001838	BP	GO:0001838	embryonic epithelial tube formation	6/174	127/18903	0.00115105625241675	0.00875359714539509	0.00552077065038592	ST14/ABL1/PRKACA/CASP3/MTHFD1/TGFB2	6	0.047244094488189
GO:0002053	BP	GO:0002053	positive regulation of mesenchymal cell proliferation	3/174	23/18903	0.00118553353731612	0.00899765091097871	0.00567469192912091	STAT1/FGFR2/KDR	3	0.130434782608696
GO:0033273	BP	GO:0033273	response to vitamin	5/174	86/18903	0.00119071677441643	0.0090188427170658	0.00568805730327865	CBS/IGF1R/ALAD/RXRA/PPARD	5	0.0581395348837209
GO:0045471	BP	GO:0045471	response to ethanol	6/174	128/18903	0.00119860817403102	0.00902055423422159	0.00568913673308611	NQO1/IGF1R/ALAD/PPARA/FGFR2/RHOA	6	0.046875
GO:0009267	BP	GO:0009267	cellular response to starvation	7/174	175/18903	0.00120050854336671	0.00902055423422159	0.00568913673308611	IGF1R/MAPK8/MAPK1/HSPA8/AKR1C3/PPARA/ALB	7	0.04
GO:0048660	BP	GO:0048660	regulation of smooth muscle cell proliferation	7/174	175/18903	0.00120050854336671	0.00902055423422159	0.00568913673308611	AKT1/IGF1R/STAT1/FGFR2/PPARD/RHOA/SRC	7	0.04
GO:0071453	BP	GO:0071453	cellular response to oxygen levels	7/174	175/18903	0.00120050854336671	0.00902055423422159	0.00568913673308611	AKT1/CBS/MDM2/PDK1/CCNA2/PPARD/SRC	7	0.04
GO:0010001	BP	GO:0010001	glial cell differentiation	8/174	227/18903	0.00122974664961467	0.0092218774599335	0.00581610846108436	AKT1/MAP2K1/CSK/ABL1/MAPK1/CDK6/RHEB/RHOA	8	0.0352422907488987
GO:0043124	BP	GO:0043124	negative regulation of I-kappaB kinase/NF-kappaB signaling	4/174	51/18903	0.00123705452144154	0.00923075132567456	0.00582170508344714	ABL1/NR1H4/STAT1/RHOA	4	0.0784313725490196
GO:0060425	BP	GO:0060425	lung morphogenesis	4/174	51/18903	0.00123705452144154	0.00923075132567456	0.00582170508344714	MAP2K1/CDC42/MAPK1/FGFR2	4	0.0784313725490196
GO:0010634	BP	GO:0010634	positive regulation of epithelial cell migration	7/174	176/18903	0.00124071869621341	0.00923075132567456	0.00582170508344714	AKT1/RAB11A/ABL1/TGFB2/PTK2/SRC/KDR	7	0.0397727272727273
GO:0050680	BP	GO:0050680	negative regulation of epithelial cell proliferation	7/174	176/18903	0.00124071869621341	0.00923075132567456	0.00582170508344714	HPN/CDK6/STAT1/FGFR2/TGFB2/PPARD/AR	7	0.0397727272727273
GO:0045931	BP	GO:0045931	positive regulation of mitotic cell cycle	6/174	129/18903	0.00124765030603975	0.00925688334924177	0.00583818618331372	AKT1/RAB11A/EIF4E/ABL1/MDM2/EGFR	6	0.0465116279069767
GO:0019915	BP	GO:0019915	lipid storage	5/174	87/18903	0.00125404755871223	0.00925688334924177	0.00583818618331372	HEXB/PPARA/NR1H3/GM2A/PPARD	5	0.0574712643678161
GO:0048145	BP	GO:0048145	regulation of fibroblast proliferation	5/174	87/18903	0.00125404755871223	0.00925688334924177	0.00583818618331372	MIF/ABL1/CCNA2/CDK6/EGFR	5	0.0574712643678161
GO:1900182	BP	GO:1900182	positive regulation of protein localization to nucleus	5/174	87/18903	0.00125404755871223	0.00925688334924177	0.00583818618331372	AKT1/PARP1/SRC/HSP90AA1/MAPK14	5	0.0574712643678161
GO:0032103	BP	GO:0032103	positive regulation of response to external stimulus	12/174	464/18903	0.00125791856202723	0.00926732190618495	0.00584476963441926	MIF/IGF1R/MAPK1/NR1H4/MMP8/PTK2/PGF/SRC/KDR/HSP90AA1/PLAU/MMP12	12	0.0258620689655172
GO:0006112	BP	GO:0006112	energy reserve metabolic process	5/174	88/18903	0.00131983419679803	0.00967071846168771	0.00609918617051242	AKT1/INSR/ACADM/GSK3B/PYGL	5	0.0568181818181818
GO:0033627	BP	GO:0033627	cell adhesion mediated by integrin	5/174	88/18903	0.00131983419679803	0.00967071846168771	0.00609918617051242	DPP4/TGFB2/PTK2/PDE3B/PLAU	5	0.0568181818181818
GO:0006694	BP	GO:0006694	steroid biosynthetic process	7/174	178/18903	0.0013243016969153	0.00967071846168771	0.00609918617051242	HMGCR/IGF1R/FDPS/NR1H4/SEC14L2/AKR1C3/HSD17B1	7	0.0393258426966292
GO:0050867	BP	GO:0050867	positive regulation of cell activation	12/174	467/18903	0.00132847898874912	0.00967071846168771	0.00609918617051242	DPP4/AKT1/MIF/CSK/ABL1/GP1BA/MMP8/PNP/RHOA/SRC/SELP/CD209	12	0.0256959314775161
GO:0006636	BP	GO:0006636	unsaturated fatty acid biosynthetic process	4/174	52/18903	0.00133062112450051	0.00967071846168771	0.00609918617051242	FABP5/MIF/CBR1/AKR1C3	4	0.0769230769230769
GO:0010543	BP	GO:0010543	regulation of platelet activation	4/174	52/18903	0.00133062112450051	0.00967071846168771	0.00609918617051242	GP1BA/SELP/FGG/CTSG	4	0.0769230769230769
GO:0046622	BP	GO:0046622	positive regulation of organ growth	4/174	52/18903	0.00133062112450051	0.00967071846168771	0.00609918617051242	AKT1/ERBB4/FGFR2/MAPK14	4	0.0769230769230769
GO:0060571	BP	GO:0060571	morphogenesis of an epithelial fold	3/174	24/18903	0.00134577889224385	0.00976207304143037	0.00615680221957711	FGFR2/EGFR/AR	3	0.125
GO:0048659	BP	GO:0048659	smooth muscle cell proliferation	7/174	179/18903	0.00136771240200909	0.00990213278383545	0.0062451359299738	AKT1/IGF1R/STAT1/FGFR2/PPARD/RHOA/SRC	7	0.0391061452513966
GO:0006111	BP	GO:0006111	regulation of gluconeogenesis	4/174	53/18903	0.00142902084238558	0.0103261812595372	0.00651257734178544	KAT2B/ACADM/PPARA/PDK2	4	0.0754716981132075
GO:0008406	BP	GO:0008406	gonad development	8/174	233/18903	0.00145127508179529	0.0104650720988644	0.00660017384144485	INSR/CTNNA1/AKR1C3/CASP3/TGFB2/SRC/KDR/AR	8	0.0343347639484979
GO:0042770	BP	GO:0042770	signal transduction in response to DNA damage	7/174	181/18903	0.00145786801312353	0.0104650720988644	0.00660017384144485	MIF/DOT1L/ABL1/MDM2/GRB2/CDK2/MAPK14	7	0.0386740331491713
GO:0001101	BP	GO:0001101	response to acid chemical	6/174	133/18903	0.0014593393223761	0.0104650720988644	0.00660017384144485	NQO1/IGF1R/ALAD/CASP3/RHOA/EGFR	6	0.0451127819548872
GO:0035303	BP	GO:0035303	regulation of dephosphorylation	6/174	133/18903	0.0014593393223761	0.0104650720988644	0.00660017384144485	LGALS3/FKBP1A/PPIA/GSK3B/TGFB2/SRC	6	0.0451127819548872
GO:0070661	BP	GO:0070661	leukocyte proliferation	10/174	348/18903	0.00147522014667579	0.0105588812016339	0.00665933792367379	ARG2/MIF/ABL1/LGALS3/MAPK1/IMPDH2/PNP/CASP3/PTK2/CD209	10	0.028735632183908
GO:0007163	BP	GO:0007163	establishment or maintenance of cell polarity	8/174	234/18903	0.00149109547633192	0.0106321590486276	0.00670555323153943	CDC42/IGF1R/ABL1/CTNNA1/GSK3B/PTK2/RHOA/HSP90AA1	8	0.0341880341880342
GO:0009743	BP	GO:0009743	response to carbohydrate	8/174	234/18903	0.00149109547633192	0.0106321590486276	0.00670555323153943	NQO1/IGF1R/NR1H4/PRKACA/CASP3/PPARD/RHOA/PKLR	8	0.0341880341880342
GO:0043254	BP	GO:0043254	regulation of protein-containing complex assembly	11/174	410/18903	0.00149594162693604	0.0106465883335901	0.00671465357870001	CDC42/ABL1/LGALS3/PARP1/GRB2/GSK3B/HSPA8/RHOA/SRC/SELP/HSP90AA1	11	0.0268292682926829
GO:0046039	BP	GO:0046039	GTP metabolic process	3/174	25/18903	0.0015190086049109	0.0107903963422296	0.00680535126791285	IMPDH2/IMPDH1/RHOA	3	0.12
GO:0050819	BP	GO:0050819	negative regulation of coagulation	4/174	54/18903	0.00153238387336164	0.0108445627960977	0.0068395132888265	GP1BA/ANXA5/FGG/PLAU	4	0.0740740740740741
GO:1904031	BP	GO:1904031	positive regulation of cyclin-dependent protein kinase activity	4/174	54/18903	0.00153238387336164	0.0108445627960977	0.0068395132888265	AKT1/CCNT1/SRC/EGFR	4	0.0740740740740741
GO:0044000	BP	GO:0044000	movement in host	7/174	183/18903	0.00155259870104395	0.0109465463557715	0.00690383288609803	DPP4/INSR/PPIA/SRC/CD209/EGFR/APCS	7	0.0382513661202186
GO:0071466	BP	GO:0071466	cellular response to xenobiotic stimulus	7/174	183/18903	0.00155259870104395	0.0109465463557715	0.00690383288609803	NQO1/PDE4B/CBR1/UMPS/CYP2C9/CES2/GSTO1	7	0.0382513661202186
GO:0042476	BP	GO:0042476	odontogenesis	6/174	135/18903	0.00157493541422059	0.0110833141463434	0.00699009040875594	CTNNA1/PPARA/FGFR2/TGFB2/RHOA/SRC	6	0.0444444444444444
GO:0050728	BP	GO:0050728	negative regulation of inflammatory response	7/174	184/18903	0.00160172880499732	0.0112508771926441	0.00709577006624315	NR1H4/PPARA/NR1H3/PPARD/SRC/APCS/MAPK14	7	0.0380434782608696
GO:0046031	BP	GO:0046031	ADP metabolic process	5/174	92/18903	0.00160869952003238	0.0112788375270671	0.00711340425606177	INSR/HK1/PPARA/TPI1/PKLR	5	0.0543478260869565
GO:0007265	BP	GO:0007265	Ras protein signal transduction	10/174	353/18903	0.00163917571943772	0.011419277702962	0.00720197790051181	CDC42/ABL1/CCNA2/GRB2/TGFB2/RHOA/SRC/ARHGAP1/CDK2/RTN4R	10	0.028328611898017
GO:0031103	BP	GO:0031103	axon regeneration	4/174	55/18903	0.00164084000928032	0.011419277702962	0.00720197790051181	MAP2K1/IGF1R/CTNNA1/RTN4R	4	0.0727272727272727
GO:0038093	BP	GO:0038093	Fc receptor signaling pathway	4/174	55/18903	0.00164084000928032	0.011419277702962	0.00720197790051181	ABL1/MAPK8/PTK2/SRC	4	0.0727272727272727
GO:2000772	BP	GO:2000772	regulation of cellular senescence	4/174	55/18903	0.00164084000928032	0.011419277702962	0.00720197790051181	ARG2/MIF/ABL1/CDK6	4	0.0727272727272727
GO:1905952	BP	GO:1905952	regulation of lipid localization	7/174	185/18903	0.00165206189523966	0.0114762016000811	0.0072378790021162	AKT1/MIF/RXRA/PPARA/NR1H3/PPARD/FABP3	7	0.0378378378378378
GO:0045137	BP	GO:0045137	development of primary sexual characteristics	8/174	238/18903	0.00165913933047842	0.0115041793282437	0.00725552416192187	INSR/CTNNA1/AKR1C3/CASP3/TGFB2/SRC/KDR/AR	8	0.0336134453781513
GO:0002433	BP	GO:0002433	immune response-regulating cell surface receptor signaling pathway involved in phagocytosis	3/174	26/18903	0.00170559618067557	0.0116972887154695	0.00737731553746753	ABL1/PTK2/SRC	3	0.115384615384615
GO:0032515	BP	GO:0032515	negative regulation of phosphoprotein phosphatase activity	3/174	26/18903	0.00170559618067557	0.0116972887154695	0.00737731553746753	LGALS3/FKBP1A/GSK3B	3	0.115384615384615
GO:0038096	BP	GO:0038096	Fc-gamma receptor signaling pathway involved in phagocytosis	3/174	26/18903	0.00170559618067557	0.0116972887154695	0.00737731553746753	ABL1/PTK2/SRC	3	0.115384615384615
GO:0060314	BP	GO:0060314	regulation of ryanodine-sensitive calcium-release channel activity	3/174	26/18903	0.00170559618067557	0.0116972887154695	0.00737731553746753	FKBP1A/PRKACA/GSTO1	3	0.115384615384615
GO:0060669	BP	GO:0060669	embryonic placenta morphogenesis	3/174	26/18903	0.00170559618067557	0.0116972887154695	0.00737731553746753	ST14/GRB2/FGFR2	3	0.115384615384615
GO:2000773	BP	GO:2000773	negative regulation of cellular senescence	3/174	26/18903	0.00170559618067557	0.0116972887154695	0.00737731553746753	MIF/ABL1/CDK6	3	0.115384615384615
GO:0033673	BP	GO:0033673	negative regulation of kinase activity	8/174	240/18903	0.00174860623415502	0.0119704949459759	0.00754962286596686	AKT1/HMGCR/KAT2B/CSK/ABL1/PPIA/PTPN1/CASP3	8	0.0333333333333333
GO:0001954	BP	GO:0001954	positive regulation of cell-matrix adhesion	4/174	56/18903	0.00175451857124559	0.0119892102368449	0.00756142633679449	ABL1/GSK3B/CDK6/KDR	4	0.0714285714285714
GO:0002042	BP	GO:0002042	cell migration involved in sprouting angiogenesis	5/174	94/18903	0.00176938315262566	0.0120254292823495	0.00758426917958082	AKT1/ABL1/RHOA/EPHB4/KDR	5	0.0531914893617021
GO:1900542	BP	GO:1900542	regulation of purine nucleotide metabolic process	5/174	94/18903	0.00176938315262566	0.0120254292823495	0.00758426917958082	INSR/PARP1/PDK1/PPARA/PDK2	5	0.0531914893617021
GO:1903035	BP	GO:1903035	negative regulation of response to wounding	5/174	94/18903	0.00176938315262566	0.0120254292823495	0.00758426917958082	GP1BA/FGG/APCS/PLAU/RTN4R	5	0.0531914893617021
GO:0016311	BP	GO:0016311	dephosphorylation	10/174	357/18903	0.00178073341211991	0.0120808029325833	0.00761919256226997	EPHX2/IMPA1/LGALS3/FKBP1A/PPIA/GSK3B/PTPN1/TGFB2/SRC/PPP5C	10	0.0280112044817927
GO:0042445	BP	GO:0042445	hormone metabolic process	8/174	241/18903	0.00179474851803285	0.0121540240754397	0.00766537210763346	DPP4/HPN/MME/IGF1R/CYP2C9/AKR1C3/HSD17B1/CTSG	8	0.033195020746888
GO:0061138	BP	GO:0061138	morphogenesis of a branching epithelium	7/174	188/18903	0.00181048015517893	0.0122385862819622	0.00771870430240404	ST14/ABL1/GRB2/FGFR2/SRC/KDR/AR	7	0.0372340425531915
GO:0007044	BP	GO:0007044	cell-substrate junction assembly	5/174	95/18903	0.00185399430410869	0.0124545623097839	0.00785491734668518	ABL1/PTK2/RHOA/SRC/KDR	5	0.0526315789473684
GO:0034109	BP	GO:0034109	homotypic cell-cell adhesion	5/174	95/18903	0.00185399430410869	0.0124545623097839	0.00785491734668518	CLIC1/PPIA/GP1BA/FGG/CTSG	5	0.0526315789473684
GO:0043648	BP	GO:0043648	dicarboxylic acid metabolic process	5/174	95/18903	0.00185399430410869	0.0124545623097839	0.00785491734668518	ME2/NR1H4/ATIC/MTHFD1/OAT	5	0.0526315789473684
GO:0001819	BP	GO:0001819	positive regulation of cytokine production	12/174	486/18903	0.00185563733247576	0.0124545623097839	0.00785491734668518	MIF/PDE4B/HK1/ABL1/NR1H4/MMP8/PNP/STAT1/SRC/HSP90AA1/MMP12/MAPK14	12	0.0246913580246914
GO:0007565	BP	GO:0007565	female pregnancy	7/174	189/18903	0.00186582695325479	0.0125007091788225	0.00788402152819637	AKT1/CBS/UMPS/PARP1/PPARD/PGF/AR	7	0.037037037037037
GO:0061756	BP	GO:0061756	leukocyte adhesion to vascular endothelial cell	4/174	57/18903	0.00187354834736952	0.0125301850465919	0.00790261154358925	GP1BA/SELE/RHOA/SELP	4	0.0701754385964912
GO:0060537	BP	GO:0060537	muscle tissue development	11/174	422/18903	0.00187687896731832	0.0125302433003977	0.00790264828344554	CDC42/ABL1/FKBP1A/ACADM/ERBB4/PPARA/RARB/FGFR2/TGFB2/RHOA/MAPK14	11	0.0260663507109005
GO:0001655	BP	GO:0001655	urogenital system development	10/174	360/18903	0.00189327305082877	0.0125902994394753	0.00794052484601615	ARG2/MME/ACAT1/ERBB4/RARB/STAT1/FGFR2/TGFB2/RHOA/AR	10	0.0277777777777778
GO:0009081	BP	GO:0009081	branched-chain amino acid metabolic process	3/174	27/18903	0.00190590163837233	0.0125902994394753	0.00794052484601615	BCAT2/ACAT1/SDS	3	0.111111111111111
GO:0031639	BP	GO:0031639	plasminogen activation	3/174	27/18903	0.00190590163837233	0.0125902994394753	0.00794052484601615	HPN/FGG/PLAU	3	0.111111111111111
GO:0042026	BP	GO:0042026	protein refolding	3/174	27/18903	0.00190590163837233	0.0125902994394753	0.00794052484601615	FKBP1A/HSPA8/HSP90AA1	3	0.111111111111111
GO:0042730	BP	GO:0042730	fibrinolysis	3/174	27/18903	0.00190590163837233	0.0125902994394753	0.00794052484601615	GP1BA/FGG/PLAU	3	0.111111111111111
GO:0046174	BP	GO:0046174	polyol catabolic process	3/174	27/18903	0.00190590163837233	0.0125902994394753	0.00794052484601615	SORD/IMPA1/TPI1	3	0.111111111111111
GO:0050777	BP	GO:0050777	negative regulation of immune response	7/174	190/18903	0.00192247830310465	0.0126554767178198	0.00798163123912284	ARG2/LGALS3/PARP1/NR1H3/SRC/MMP12/MAPK14	7	0.0368421052631579
GO:0051302	BP	GO:0051302	regulation of cell division	7/174	190/18903	0.00192247830310465	0.0126554767178198	0.00798163123912284	RAB11A/CDC42/IGF1R/FGFR2/TGFB2/PGF/RHOA	7	0.0368421052631579
GO:0002831	BP	GO:0002831	regulation of response to biotic stimulus	10/174	361/18903	0.00193203993293771	0.0126962624164478	0.00800735420583023	ARG2/MIF/XIAP/PARP1/PTPN1/STAT1/NR1H3/SRC/HSP90AA1/MMP12	10	0.0277008310249307
GO:0006576	BP	GO:0006576	cellular biogenic amine metabolic process	5/174	97/18903	0.00203205269366695	0.0133302656704552	0.00840721114450766	AMD1/ALDH2/TGFB2/SRM/GCDH	5	0.0515463917525773
GO:0001649	BP	GO:0001649	osteoblast differentiation	8/174	246/18903	0.00204010361373653	0.013359845192733	0.00842586653334166	AKT1/CLIC1/GSK3B/PRKACA/CDK6/FGFR2/PTK2/MAPK14	8	0.032520325203252
GO:0050731	BP	GO:0050731	positive regulation of peptidyl-tyrosine phosphorylation	7/174	193/18903	0.00210046747362209	0.0137181220070852	0.00865182668304193	MIF/TNK2/ABL1/PTPN1/ERBB4/SRC/EGFR	7	0.0362694300518135
GO:0010212	BP	GO:0010212	response to ionizing radiation	6/174	143/18903	0.00210833633137117	0.0137181220070852	0.00865182668304193	ALAD/PARP1/MDM2/GRB2/CASP3/MAPK14	6	0.041958041958042
GO:0055123	BP	GO:0055123	digestive system development	6/174	143/18903	0.00210833633137117	0.0137181220070852	0.00865182668304193	INSR/RARB/FGFR2/TGFB2/SRC/EGFR	6	0.041958041958042
GO:0010758	BP	GO:0010758	regulation of macrophage chemotaxis	3/174	28/18903	0.00212027177362954	0.0137181220070852	0.00865182668304193	MIF/MAPK1/PTK2	3	0.107142857142857
GO:0032104	BP	GO:0032104	regulation of response to extracellular stimulus	3/174	28/18903	0.00212027177362954	0.0137181220070852	0.00865182668304193	NR1H4/RXRA/PPARA	3	0.107142857142857
GO:0032107	BP	GO:0032107	regulation of response to nutrient levels	3/174	28/18903	0.00212027177362954	0.0137181220070852	0.00865182668304193	NR1H4/RXRA/PPARA	3	0.107142857142857
GO:1903649	BP	GO:1903649	regulation of cytoplasmic transport	3/174	28/18903	0.00212027177362954	0.0137181220070852	0.00865182668304193	MAP2K1/MAPK1/SRC	3	0.107142857142857
GO:0048661	BP	GO:0048661	positive regulation of smooth muscle cell proliferation	5/174	98/18903	0.00212561940351068	0.0137221727944634	0.00865438145769026	AKT1/IGF1R/STAT1/FGFR2/SRC	5	0.0510204081632653
GO:0061098	BP	GO:0061098	positive regulation of protein tyrosine kinase activity	4/174	59/18903	0.00212817367040326	0.0137221727944634	0.00865438145769026	PTPN1/ERBB4/SRC/EGFR	4	0.0677966101694915
GO:0034504	BP	GO:0034504	protein localization to nucleus	9/174	306/18903	0.0021612190035219	0.0138491028044351	0.00873443443043574	AKT1/PARP1/MDM2/CTNNA1/GSK3B/SRC/HSP90AA1/MMP12/MAPK14	9	0.0294117647058824
GO:0048608	BP	GO:0048608	reproductive structure development	9/174	306/18903	0.0021612190035219	0.0138491028044351	0.00873443443043574	INSR/CTNNA1/AKR1C3/CASP3/FGFR2/TGFB2/SRC/KDR/AR	9	0.0294117647058824
GO:0009749	BP	GO:0009749	response to glucose	7/174	194/18903	0.002162545480332	0.0138491028044351	0.00873443443043574	IGF1R/NR1H4/PRKACA/CASP3/PPARD/RHOA/PKLR	7	0.0360824742268041
GO:0061136	BP	GO:0061136	regulation of proteasomal protein catabolic process	7/174	194/18903	0.002162545480332	0.0138491028044351	0.00873443443043574	AKT1/ALAD/MDM2/FHIT/GSK3B/PRKACA/CDK2	7	0.0360824742268041
GO:0044264	BP	GO:0044264	cellular polysaccharide metabolic process	5/174	99/18903	0.00222229101193052	0.0142075960966134	0.00896053110965739	AKT1/INSR/ACADM/GSK3B/PYGL	5	0.0505050505050505
GO:0009636	BP	GO:0009636	response to toxic substance	8/174	250/18903	0.00225480988465093	0.014366795413688	0.00906093588070962	EPHX2/NQO1/ADH5/GSTZ1/ALAD/GSR/ALB/GSTO1	8	0.032
GO:0060047	BP	GO:0060047	heart contraction	8/174	250/18903	0.00225480988465093	0.014366795413688	0.00906093588070962	PDE4B/CDC42/THRB/MDM2/PRKACA/TGFB2/GSTO1/HSP90AA1	8	0.032
GO:1905517	BP	GO:1905517	macrophage migration	4/174	60/18903	0.00226402359678222	0.0143769309883208	0.00906732824513171	MIF/LGALS3/MAPK1/PTK2	4	0.0666666666666667
GO:2000351	BP	GO:2000351	regulation of endothelial cell apoptotic process	4/174	60/18903	0.00226402359678222	0.0143769309883208	0.00906732824513171	ABL1/AKR1C3/FGG/KDR	4	0.0666666666666667
GO:0001822	BP	GO:0001822	kidney development	9/174	309/18903	0.00230788766726192	0.0146228134734743	0.00922240287158896	ARG2/MME/ACAT1/ERBB4/RARB/STAT1/FGFR2/TGFB2/RHOA	9	0.029126213592233
GO:0050870	BP	GO:0050870	positive regulation of T cell activation	8/174	251/18903	0.00231116519432347	0.0146228134734743	0.00922240287158896	DPP4/AKT1/CSK/ABL1/PNP/RHOA/SRC/CD209	8	0.0318725099601594
GO:0006165	BP	GO:0006165	nucleoside diphosphate phosphorylation	5/174	100/18903	0.00232212759029987	0.0146228134734743	0.00922240287158896	INSR/HK1/PPARA/TPI1/PKLR	5	0.05
GO:0036473	BP	GO:0036473	cell death in response to oxidative stress	5/174	100/18903	0.00232212759029987	0.0146228134734743	0.00922240287158896	AKT1/ABL1/PPIA/PARP1/PDK1	5	0.05
GO:0098869	BP	GO:0098869	cellular oxidant detoxification	5/174	100/18903	0.00232212759029987	0.0146228134734743	0.00922240287158896	NQO1/GSTZ1/GSR/ALB/GSTO1	5	0.05
GO:1902175	BP	GO:1902175	regulation of oxidative stress-induced intrinsic apoptotic signaling pathway	3/174	29/18903	0.00234904041810398	0.014767634095147	0.00931373920160527	AKT1/PPIA/PARP1	3	0.103448275862069
GO:0061458	BP	GO:0061458	reproductive system development	9/174	310/18903	0.00235850091399713	0.0148024383487474	0.00933568975502848	INSR/CTNNA1/AKR1C3/CASP3/FGFR2/TGFB2/SRC/KDR/AR	9	0.0290322580645161
GO:1900024	BP	GO:1900024	regulation of substrate adhesion-dependent cell spreading	4/174	61/18903	0.0024057333857182	0.0150737978919087	0.00950683240378235	CDC42/ABL1/PTK2/FGG	4	0.0655737704918033
GO:1903038	BP	GO:1903038	negative regulation of leukocyte cell-cell adhesion	6/174	147/18903	0.00242134706095814	0.015120353869756	0.00953619460446742	ARG2/AKT1/LGALS3/PPARA/CASP3/CTSG	6	0.0408163265306122
GO:0006721	BP	GO:0006721	terpenoid metabolic process	5/174	101/18903	0.00242518931368038	0.015120353869756	0.00953619460446742	ADH5/FDPS/CYP2C9/AKR1C3/PPARD	5	0.0495049504950495
GO:0150115	BP	GO:0150115	cell-substrate junction organization	5/174	101/18903	0.00242518931368038	0.015120353869756	0.00953619460446742	ABL1/PTK2/RHOA/SRC/KDR	5	0.0495049504950495
GO:0051346	BP	GO:0051346	negative regulation of hydrolase activity	10/174	373/18903	0.00244936539622217	0.0152458849415017	0.00961536528654179	AKT1/XIAP/ABL1/LGALS3/FKBP1A/CSNK2A1/GSK3B/TGFB2/SRC/APCS	10	0.0268096514745308
GO:0022604	BP	GO:0022604	regulation of cell morphogenesis	9/174	312/18903	0.00246237728760912	0.0153016262419466	0.00965052054105022	CDC42/HPN/ABL1/HEXB/PTK2/RHOA/SRC/FGG/KDR	9	0.0288461538461538
GO:0034612	BP	GO:0034612	response to tumor necrosis factor	8/174	254/18903	0.00248689528116169	0.0154285674351018	0.00973058056687227	AKT1/XIAP/MAPK1/NR1H4/STAT1/CASP3/SELE/MAPK14	8	0.031496062992126
GO:0009746	BP	GO:0009746	response to hexose	7/174	199/18903	0.00249450526370804	0.0154503675775151	0.0097443296101982	IGF1R/NR1H4/PRKACA/CASP3/PPARD/RHOA/PKLR	7	0.0351758793969849
GO:0019218	BP	GO:0019218	regulation of steroid metabolic process	5/174	102/18903	0.00253153644403974	0.0156284050195056	0.0098566153217845	EPHX2/IGF1R/NR1H4/SEC14L2/AKR1C3	5	0.0490196078431373
GO:0046939	BP	GO:0046939	nucleotide phosphorylation	5/174	102/18903	0.00253153644403974	0.0156284050195056	0.0098566153217845	INSR/HK1/PPARA/TPI1/PKLR	5	0.0490196078431373
GO:0031102	BP	GO:0031102	neuron projection regeneration	4/174	62/18903	0.00255342829686658	0.0156610268874483	0.00987718947525625	MAP2K1/IGF1R/CTNNA1/RTN4R	4	0.0645161290322581
GO:0045428	BP	GO:0045428	regulation of nitric oxide biosynthetic process	4/174	62/18903	0.00255342829686658	0.0156610268874483	0.00987718947525625	AKT1/INSR/MMP8/HSP90AA1	4	0.0645161290322581
GO:0046824	BP	GO:0046824	positive regulation of nucleocytoplasmic transport	4/174	62/18903	0.00255342829686658	0.0156610268874483	0.00987718947525625	GSK3B/PRKACA/HSP90AA1/MAPK14	4	0.0645161290322581
GO:1903409	BP	GO:1903409	reactive oxygen species biosynthetic process	4/174	62/18903	0.00255342829686658	0.0156610268874483	0.00987718947525625	ARG2/MMP8/PPARA/RHOA	4	0.0645161290322581
GO:0005979	BP	GO:0005979	regulation of glycogen biosynthetic process	3/174	30/18903	0.00259252869468779	0.0157726100586489	0.00994756341255417	AKT1/INSR/GSK3B	3	0.1
GO:0008299	BP	GO:0008299	isoprenoid biosynthetic process	3/174	30/18903	0.00259252869468779	0.0157726100586489	0.00994756341255417	HMGCR/FDPS/AKR1C3	3	0.1
GO:0010464	BP	GO:0010464	regulation of mesenchymal cell proliferation	3/174	30/18903	0.00259252869468779	0.0157726100586489	0.00994756341255417	STAT1/FGFR2/KDR	3	0.1
GO:0010962	BP	GO:0010962	regulation of glucan biosynthetic process	3/174	30/18903	0.00259252869468779	0.0157726100586489	0.00994756341255417	AKT1/INSR/GSK3B	3	0.1
GO:0060045	BP	GO:0060045	positive regulation of cardiac muscle cell proliferation	3/174	30/18903	0.00259252869468779	0.0157726100586489	0.00994756341255417	ERBB4/FGFR2/MAPK14	3	0.1
GO:0046620	BP	GO:0046620	regulation of organ growth	5/174	103/18903	0.00264122931358494	0.0159915200174035	0.0100856268458257	AKT1/ERBB4/PPARA/FGFR2/MAPK14	5	0.0485436893203883
GO:0048144	BP	GO:0048144	fibroblast proliferation	5/174	103/18903	0.00264122931358494	0.0159915200174035	0.0100856268458257	MIF/ABL1/CCNA2/CDK6/EGFR	5	0.0485436893203883
GO:1903076	BP	GO:1903076	regulation of protein localization to plasma membrane	5/174	103/18903	0.00264122931358494	0.0159915200174035	0.0100856268458257	AKT1/CSK/LGALS3/EGFR/AR	5	0.0485436893203883
GO:0050708	BP	GO:0050708	regulation of protein secretion	8/174	257/18903	0.00267293517435464	0.0161575504449771	0.0101903399022292	HMGCR/PPIA/NR1H4/TGFB2/NR1H3/PPARD/FGG/HADH	8	0.0311284046692607
GO:0031663	BP	GO:0031663	lipopolysaccharide-mediated signaling pathway	4/174	63/18903	0.00270723272494417	0.0162865739050868	0.0102717131845443	AKT1/MIF/MAPK1/MAPK14	4	0.0634920634920635
GO:0032623	BP	GO:0032623	interleukin-2 production	4/174	63/18903	0.00270723272494417	0.0162865739050868	0.0102717131845443	PDE4B/ABL1/NR1H4/PNP	4	0.0634920634920635
GO:0032663	BP	GO:0032663	regulation of interleukin-2 production	4/174	63/18903	0.00270723272494417	0.0162865739050868	0.0102717131845443	PDE4B/ABL1/NR1H4/PNP	4	0.0634920634920635
GO:0003007	BP	GO:0003007	heart morphogenesis	8/174	258/18903	0.00273730999078906	0.0164194999030716	0.0103555477426304	CDC42/INSR/FKBP1A/MDM2/FGFR2/TGFB2/PTK2/EPHB4	8	0.0310077519379845
GO:0016236	BP	GO:0016236	macroautophagy	9/174	317/18903	0.00273803431575611	0.0164194999030716	0.0103555477426304	AKT1/RAB5A/MAPK8/PRKACA/RHEB/CASP3/SRC/KDR/CTSD	9	0.028391167192429
GO:0009135	BP	GO:0009135	purine nucleoside diphosphate metabolic process	5/174	104/18903	0.0027543283082159	0.016464859554026	0.0103841554367636	INSR/HK1/PPARA/TPI1/PKLR	5	0.0480769230769231
GO:0009179	BP	GO:0009179	purine ribonucleoside diphosphate metabolic process	5/174	104/18903	0.0027543283082159	0.016464859554026	0.0103841554367636	INSR/HK1/PPARA/TPI1/PKLR	5	0.0480769230769231
GO:0071456	BP	GO:0071456	cellular response to hypoxia	6/174	151/18903	0.00276811488926223	0.0165210907631284	0.0104196196697746	CBS/MDM2/PDK1/CCNA2/PPARD/SRC	6	0.0397350993377483
GO:0001763	BP	GO:0001763	morphogenesis of a branching structure	7/174	203/18903	0.00278725639645509	0.0165828566678684	0.0104585745575104	ST14/ABL1/GRB2/FGFR2/SRC/KDR/AR	7	0.0344827586206897
GO:0051701	BP	GO:0051701	biological process involved in interaction with host	7/174	203/18903	0.00278725639645509	0.0165828566678684	0.0104585745575104	DPP4/INSR/PPIA/SRC/CD209/EGFR/APCS	7	0.0344827586206897
GO:0072001	BP	GO:0072001	renal system development	9/174	318/18903	0.00279599103359528	0.0166086270531045	0.0104748275771659	ARG2/MME/ACAT1/ERBB4/RARB/STAT1/FGFR2/TGFB2/RHOA	9	0.0283018867924528
GO:0032148	BP	GO:0032148	activation of protein kinase B activity	3/174	31/18903	0.00285104526874315	0.0168296443719862	0.0106142200928417	INSR/PPIA/SRC	3	0.0967741935483871
GO:0048384	BP	GO:0048384	retinoic acid receptor signaling pathway	3/174	31/18903	0.00285104526874315	0.0168296443719862	0.0106142200928417	RXRA/AKR1C3/RARB	3	0.0967741935483871
GO:0048679	BP	GO:0048679	regulation of axon regeneration	3/174	31/18903	0.00285104526874315	0.0168296443719862	0.0106142200928417	MAP2K1/IGF1R/RTN4R	3	0.0967741935483871
GO:0060603	BP	GO:0060603	mammary gland duct morphogenesis	3/174	31/18903	0.00285104526874315	0.0168296443719862	0.0106142200928417	FGFR2/SRC/AR	3	0.0967741935483871
GO:0050918	BP	GO:0050918	positive chemotaxis	4/174	64/18903	0.00286727015094307	0.0168939338632892	0.010654766571143	MIF/LGALS3/PGF/KDR	4	0.0625
GO:0008585	BP	GO:0008585	female gonad development	5/174	105/18903	0.00287089385110509	0.0168939338632892	0.010654766571143	INSR/CTNNA1/CASP3/SRC/KDR	5	0.0476190476190476
GO:0030902	BP	GO:0030902	hindbrain development	6/174	153/18903	0.00295484655965935	0.0173608741791823	0.0109492592635352	MAP2K1/CBS/IGF1R/ABL1/ATIC/GART	6	0.0392156862745098
GO:0009416	BP	GO:0009416	response to light stimulus	9/174	321/18903	0.00297571338221605	0.0174562844132487	0.0110094331567623	AKT1/HMGCR/FECH/MME/PARP1/MAPK8/CASP7/CASP3/EGFR	9	0.0280373831775701
GO:0030593	BP	GO:0030593	neutrophil chemotaxis	5/174	106/18903	0.00299098638640782	0.0175186345489601	0.0110487565107579	DPP4/PDE4B/LGALS3/PPIA/TGFB2	5	0.0471698113207547
GO:0080164	BP	GO:0080164	regulation of nitric oxide metabolic process	4/174	65/18903	0.00303366309510781	0.0177135869887719	0.0111717102736576	AKT1/INSR/MMP8/HSP90AA1	4	0.0615384615384615
GO:1905953	BP	GO:1905953	negative regulation of lipid localization	4/174	65/18903	0.00303366309510781	0.0177135869887719	0.0111717102736576	AKT1/PPARA/NR1H3/PPARD	4	0.0615384615384615
GO:0050905	BP	GO:0050905	neuromuscular process	6/174	154/18903	0.00305167105943968	0.017763739562047	0.0112033407965134	ABL1/HEXB/GM2A/BACE1/GSTO1/HSP90AA1	6	0.038961038961039
GO:0098754	BP	GO:0098754	detoxification	6/174	154/18903	0.00305167105943968	0.017763739562047	0.0112033407965134	NQO1/ADH5/GSTZ1/GSR/ALB/GSTO1	6	0.038961038961039
GO:0034284	BP	GO:0034284	response to monosaccharide	7/174	207/18903	0.0031056986527215	0.0180503779939376	0.0113841196255788	IGF1R/NR1H4/PRKACA/CASP3/PPARD/RHOA/PKLR	7	0.0338164251207729
GO:0006221	BP	GO:0006221	pyrimidine nucleotide biosynthetic process	3/174	32/18903	0.00312488659541885	0.0180506466124348	0.0113842890394884	UMPS/DTYMK/DHODH	3	0.09375
GO:0007435	BP	GO:0007435	salivary gland morphogenesis	3/174	32/18903	0.00312488659541885	0.0180506466124348	0.0113842890394884	FGFR2/TGFB2/EGFR	3	0.09375
GO:0043552	BP	GO:0043552	positive regulation of phosphatidylinositol 3-kinase activity	3/174	32/18903	0.00312488659541885	0.0180506466124348	0.0113842890394884	CDC42/PTK2/SRC	3	0.09375
GO:0060674	BP	GO:0060674	placenta blood vessel development	3/174	32/18903	0.00312488659541885	0.0180506466124348	0.0113842890394884	AKT1/MAP2K1/MAPK1	3	0.09375
GO:0032368	BP	GO:0032368	regulation of lipid transport	6/174	155/18903	0.00315084799583271	0.0181727807955366	0.0114613173516528	AKT1/MIF/RXRA/PPARA/NR1H3/FABP3	6	0.0387096774193548
GO:0010517	BP	GO:0010517	regulation of phospholipase activity	4/174	66/18903	0.00320653307163807	0.0184095018968323	0.0116106140221133	ABL1/FGFR2/SELE/EGFR	4	0.0606060606060606
GO:0033692	BP	GO:0033692	cellular polysaccharide biosynthetic process	4/174	66/18903	0.00320653307163807	0.0184095018968323	0.0116106140221133	AKT1/INSR/ACADM/GSK3B	4	0.0606060606060606
GO:0072577	BP	GO:0072577	endothelial cell apoptotic process	4/174	66/18903	0.00320653307163807	0.0184095018968323	0.0116106140221133	ABL1/AKR1C3/FGG/KDR	4	0.0606060606060606
GO:0090263	BP	GO:0090263	positive regulation of canonical Wnt signaling pathway	5/174	108/18903	0.00324199421900476	0.0185848057660881	0.011721175707808	XIAP/FGFR2/CSNK1G2/SRC/EGFR	5	0.0462962962962963
GO:0044703	BP	GO:0044703	multi-organism reproductive process	7/174	209/18903	0.00327500236282495	0.0187455370448797	0.0118225466655769	AKT1/CBS/UMPS/PARP1/PPARD/PGF/AR	7	0.0334928229665072
GO:0007623	BP	GO:0007623	circadian rhythm	7/174	210/18903	0.00336225423313124	0.0192157923748046	0.0121191300907123	AHCY/PARP1/MAPK8/GSK3B/IMPDH2/PPARA/NR1H3	7	0.0333333333333333
GO:0046545	BP	GO:0046545	development of primary female sexual characteristics	5/174	109/18903	0.00337303036484169	0.0192482156371904	0.0121395789864515	INSR/CTNNA1/CASP3/SRC/KDR	5	0.0458715596330275
GO:0015909	BP	GO:0015909	long-chain fatty acid transport	4/174	67/18903	0.00338600054507963	0.0192509413740248	0.0121412980703511	AKT1/FABP5/MIF/FABP3	4	0.0597014925373134
GO:0000096	BP	GO:0000096	sulfur amino acid metabolic process	3/174	33/18903	0.00341433716310249	0.0192509413740248	0.0121412980703511	CBS/MTHFD1/MTAP	3	0.0909090909090909
GO:0001782	BP	GO:0001782	B cell homeostasis	3/174	33/18903	0.00341433716310249	0.0192509413740248	0.0121412980703511	MIF/ABL1/CASP3	3	0.0909090909090909
GO:0006084	BP	GO:0006084	acetyl-CoA metabolic process	3/174	33/18903	0.00341433716310249	0.0192509413740248	0.0121412980703511	ACAT1/PDK1/PDK2	3	0.0909090909090909
GO:0038094	BP	GO:0038094	Fc-gamma receptor signaling pathway	3/174	33/18903	0.00341433716310249	0.0192509413740248	0.0121412980703511	ABL1/PTK2/SRC	3	0.0909090909090909
GO:0045907	BP	GO:0045907	positive regulation of vasoconstriction	3/174	33/18903	0.00341433716310249	0.0192509413740248	0.0121412980703511	ABL1/RHOA/FGG	3	0.0909090909090909
GO:0048566	BP	GO:0048566	embryonic digestive tract development	3/174	33/18903	0.00341433716310249	0.0192509413740248	0.0121412980703511	RARB/FGFR2/TGFB2	3	0.0909090909090909
GO:0050901	BP	GO:0050901	leukocyte tethering or rolling	3/174	33/18903	0.00341433716310249	0.0192509413740248	0.0121412980703511	GP1BA/SELE/SELP	3	0.0909090909090909
GO:0044409	BP	GO:0044409	entry into host	6/174	158/18903	0.00346284504200068	0.0194953007439203	0.012295412089429	DPP4/INSR/SRC/CD209/EGFR/APCS	6	0.0379746835443038
GO:0005976	BP	GO:0005976	polysaccharide metabolic process	5/174	110/18903	0.00350783516858716	0.0197191568642486	0.0124365949972656	AKT1/INSR/ACADM/GSK3B/PYGL	5	0.0454545454545455
GO:0070663	BP	GO:0070663	regulation of leukocyte proliferation	8/174	269/18903	0.00352846100796203	0.0198055876815964	0.0124911056986125	ARG2/MIF/LGALS3/MAPK1/PNP/CASP3/PTK2/CD209	8	0.0297397769516729
GO:0003018	BP	GO:0003018	vascular process in circulatory system	8/174	270/18903	0.00360834115824938	0.0200034879633872	0.0126159186240038	FABP5/INSR/CBS/ABL1/PPARD/RHOA/SRC/FGG	8	0.0296296296296296
GO:0006222	BP	GO:0006222	UMP biosynthetic process	2/174	10/18903	0.00361144626274303	0.0200034879633872	0.0126159186240038	UMPS/DHODH	2	0.2
GO:0009113	BP	GO:0009113	purine nucleobase biosynthetic process	2/174	10/18903	0.00361144626274303	0.0200034879633872	0.0126159186240038	APRT/GART	2	0.2
GO:0009170	BP	GO:0009170	purine deoxyribonucleoside monophosphate metabolic process	2/174	10/18903	0.00361144626274303	0.0200034879633872	0.0126159186240038	ADK/PNP	2	0.2
GO:0010572	BP	GO:0010572	positive regulation of platelet activation	2/174	10/18903	0.00361144626274303	0.0200034879633872	0.0126159186240038	GP1BA/SELP	2	0.2
GO:0032025	BP	GO:0032025	response to cobalt ion	2/174	10/18903	0.00361144626274303	0.0200034879633872	0.0126159186240038	ALAD/CASP3	2	0.2
GO:0032261	BP	GO:0032261	purine nucleotide salvage	2/174	10/18903	0.00361144626274303	0.0200034879633872	0.0126159186240038	APRT/ADK	2	0.2
GO:0071073	BP	GO:0071073	positive regulation of phospholipid biosynthetic process	2/174	10/18903	0.00361144626274303	0.0200034879633872	0.0126159186240038	NR1H4/FABP3	2	0.2
GO:1904181	BP	GO:1904181	positive regulation of membrane depolarization	2/174	10/18903	0.00361144626274303	0.0200034879633872	0.0126159186240038	PARP1/KDR	2	0.2
GO:0021761	BP	GO:0021761	limbic system development	5/174	111/18903	0.00364646893986547	0.0201088901186733	0.012682394281465	IGF1R/GSK3B/CDK6/CASP3/FGFR2	5	0.045045045045045
GO:0031532	BP	GO:0031532	actin cytoskeleton reorganization	5/174	111/18903	0.00364646893986547	0.0201088901186733	0.012682394281465	CDC42/ABL1/GRB2/PTPN1/RHOA	5	0.045045045045045
GO:0042177	BP	GO:0042177	negative regulation of protein catabolic process	5/174	111/18903	0.00364646893986547	0.0201088901186733	0.012682394281465	HMGCR/NQO1/ALAD/FHIT/EGFR	5	0.045045045045045
GO:0016241	BP	GO:0016241	regulation of macroautophagy	6/174	160/18903	0.00368325136572476	0.0202820790533048	0.0127916221076265	AKT1/MAPK8/PRKACA/RHEB/CASP3/KDR	6	0.0375
GO:0007431	BP	GO:0007431	salivary gland development	3/174	34/18903	0.00371966973306136	0.0203341945407354	0.0128244906128431	FGFR2/TGFB2/EGFR	3	0.0882352941176471
GO:0032743	BP	GO:0032743	positive regulation of interleukin-2 production	3/174	34/18903	0.00371966973306136	0.0203341945407354	0.0128244906128431	PDE4B/ABL1/PNP	3	0.0882352941176471
GO:0035308	BP	GO:0035308	negative regulation of protein dephosphorylation	3/174	34/18903	0.00371966973306136	0.0203341945407354	0.0128244906128431	LGALS3/FKBP1A/GSK3B	3	0.0882352941176471
GO:0051450	BP	GO:0051450	myoblast proliferation	3/174	34/18903	0.00371966973306136	0.0203341945407354	0.0128244906128431	ABL1/PPARD/SRC	3	0.0882352941176471
GO:0070570	BP	GO:0070570	regulation of neuron projection regeneration	3/174	34/18903	0.00371966973306136	0.0203341945407354	0.0128244906128431	MAP2K1/IGF1R/RTN4R	3	0.0882352941176471
GO:0008016	BP	GO:0008016	regulation of heart contraction	7/174	214/18903	0.00372912977991314	0.0203564074237806	0.0128384999658827	PDE4B/THRB/MDM2/PRKACA/TGFB2/GSTO1/HSP90AA1	7	0.0327102803738318
GO:0002260	BP	GO:0002260	lymphocyte homeostasis	4/174	69/18903	0.00376520434248267	0.0204644823917069	0.0129066613286984	AKT1/MIF/ABL1/CASP3	4	0.0579710144927536
GO:0048645	BP	GO:0048645	animal organ formation	4/174	69/18903	0.00376520434248267	0.0204644823917069	0.0129066613286984	MAP2K1/MAPK1/FGFR2/AR	4	0.0579710144927536
GO:0055021	BP	GO:0055021	regulation of cardiac muscle tissue growth	4/174	69/18903	0.00376520434248267	0.0204644823917069	0.0129066613286984	ERBB4/PPARA/FGFR2/MAPK14	4	0.0579710144927536
GO:0046434	BP	GO:0046434	organophosphate catabolic process	6/174	161/18903	0.00379728333746201	0.0206091406459089	0.0129978952558336	PDE4B/ACAT1/IMPA1/FHIT/HINT1/PNP	6	0.0372670807453416
GO:0050792	BP	GO:0050792	regulation of viral process	6/174	162/18903	0.00391391525587735	0.0212032423745304	0.0133725868634366	PPIA/ISG20/PPARA/STAT1/CD209/APCS	6	0.037037037037037
GO:0006469	BP	GO:0006469	negative regulation of protein kinase activity	7/174	216/18903	0.00392361165891364	0.0212032423745304	0.0133725868634366	AKT1/HMGCR/KAT2B/ABL1/PPIA/PTPN1/CASP3	7	0.0324074074074074
GO:0007179	BP	GO:0007179	transforming growth factor beta receptor signaling pathway	7/174	216/18903	0.00392361165891364	0.0212032423745304	0.0133725868634366	FKBP1A/PARP1/PPARA/TGFB2/PTK2/SRC/FNTA	7	0.0324074074074074
GO:0007229	BP	GO:0007229	integrin-mediated signaling pathway	5/174	113/18903	0.00393546423948706	0.0212065301590646	0.0133746604229184	CDC42/ABL1/CTNNA1/PTK2/SRC	5	0.0442477876106195
GO:1904659	BP	GO:1904659	glucose transmembrane transport	5/174	113/18903	0.00393546423948706	0.0212065301590646	0.0133746604229184	AKT1/FABP5/INSR/PPARD/MAPK14	5	0.0442477876106195
GO:0043627	BP	GO:0043627	response to estrogen	4/174	70/18903	0.00396517597769533	0.0213361537630054	0.0134564122075102	MME/CTNNA1/HSP90AA1/AR	4	0.0571428571428571
GO:0030111	BP	GO:0030111	regulation of Wnt signaling pathway	9/174	336/18903	0.00401586625830995	0.0215603976097924	0.0135978396489733	XIAP/ABL1/CSNK2A1/GSK3B/FGFR2/CSNK1G2/SRC/EGFR/MAPK14	9	0.0267857142857143
GO:0001893	BP	GO:0001893	maternal placenta development	3/174	35/18903	0.00404114557532429	0.0215603976097924	0.0135978396489733	AKT1/PARP1/PPARD	3	0.0857142857142857
GO:0033146	BP	GO:0033146	regulation of intracellular estrogen receptor signaling pathway	3/174	35/18903	0.00404114557532429	0.0215603976097924	0.0135978396489733	PARP1/SRC/AR	3	0.0857142857142857
GO:0043276	BP	GO:0043276	anoikis	3/174	35/18903	0.00404114557532429	0.0215603976097924	0.0135978396489733	AKT1/PTK2/SRC	3	0.0857142857142857
GO:0071398	BP	GO:0071398	cellular response to fatty acid	3/174	35/18903	0.00404114557532429	0.0215603976097924	0.0135978396489733	NR1H4/AKR1C3/SRC	3	0.0857142857142857
GO:2000352	BP	GO:2000352	negative regulation of endothelial cell apoptotic process	3/174	35/18903	0.00404114557532429	0.0215603976097924	0.0135978396489733	ABL1/FGG/KDR	3	0.0857142857142857
GO:0009408	BP	GO:0009408	response to heat	5/174	114/18903	0.00408594595745633	0.0217686273326628	0.0137291672076291	AKT1/GSK3B/PRKACA/HSP90AA1/PKLR	5	0.043859649122807
GO:0002573	BP	GO:0002573	myeloid leukocyte differentiation	7/174	218/18903	0.00412570433023763	0.0219494453225054	0.0138432065716532	GLO1/CDC42/PARP1/CDK6/SRC/APCS/MAPK14	7	0.0321100917431193
GO:0046700	BP	GO:0046700	heterocycle catabolic process	11/174	468/18903	0.00413516401821418	0.021968786868597	0.0138554050128451	AKT1/BLVRB/AHCY/PDE4B/ACAT1/FHIT/HINT1/ISG20/PNP/RNASE3/MAPK14	11	0.0235042735042735
GO:0006633	BP	GO:0006633	fatty acid biosynthetic process	6/174	164/18903	0.00415512148080415	0.0220128064966197	0.0138831675733551	FABP5/MIF/CBR1/CYP2C9/AKR1C3/NR1H3	6	0.0365853658536585
GO:0021915	BP	GO:0021915	neural tube development	6/174	164/18903	0.00415512148080415	0.0220128064966197	0.0138831675733551	ST14/ABL1/PRKACA/CASP3/MTHFD1/TGFB2	6	0.0365853658536585
GO:0070873	BP	GO:0070873	regulation of glycogen metabolic process	3/174	36/18903	0.00437901470085612	0.0226081276752626	0.014258628270942	AKT1/INSR/GSK3B	3	0.0833333333333333
GO:0090218	BP	GO:0090218	positive regulation of lipid kinase activity	3/174	36/18903	0.00437901470085612	0.0226081276752626	0.014258628270942	CDC42/PTK2/SRC	3	0.0833333333333333
GO:0033143	BP	GO:0033143	regulation of intracellular steroid hormone receptor signaling pathway	4/174	72/18903	0.00438643799714584	0.0226081276752626	0.014258628270942	PARP1/RHOA/SRC/AR	4	0.0555555555555556
GO:0042698	BP	GO:0042698	ovulation cycle	4/174	72/18903	0.00438643799714584	0.0226081276752626	0.014258628270942	IGF1R/CASP3/TGFB2/SRC	4	0.0555555555555556
GO:0006086	BP	GO:0006086	acetyl-CoA biosynthetic process from pyruvate	2/174	11/18903	0.00438736730071374	0.0226081276752626	0.014258628270942	PDK1/PDK2	2	0.181818181818182
GO:0006183	BP	GO:0006183	GTP biosynthetic process	2/174	11/18903	0.00438736730071374	0.0226081276752626	0.014258628270942	IMPDH2/IMPDH1	2	0.181818181818182
GO:0006527	BP	GO:0006527	arginine catabolic process	2/174	11/18903	0.00438736730071374	0.0226081276752626	0.014258628270942	ARG2/OAT	2	0.181818181818182
GO:0009120	BP	GO:0009120	deoxyribonucleoside metabolic process	2/174	11/18903	0.00438736730071374	0.0226081276752626	0.014258628270942	PNP/DTYMK	2	0.181818181818182
GO:0009174	BP	GO:0009174	pyrimidine ribonucleoside monophosphate biosynthetic process	2/174	11/18903	0.00438736730071374	0.0226081276752626	0.014258628270942	UMPS/DHODH	2	0.181818181818182
GO:0015937	BP	GO:0015937	coenzyme A biosynthetic process	2/174	11/18903	0.00438736730071374	0.0226081276752626	0.014258628270942	ACAT1/PPCDC	2	0.181818181818182
GO:0019062	BP	GO:0019062	virion attachment to host cell	2/174	11/18903	0.00438736730071374	0.0226081276752626	0.014258628270942	DPP4/CD209	2	0.181818181818182
GO:0033148	BP	GO:0033148	positive regulation of intracellular estrogen receptor signaling pathway	2/174	11/18903	0.00438736730071374	0.0226081276752626	0.014258628270942	PARP1/AR	2	0.181818181818182
GO:0042762	BP	GO:0042762	regulation of sulfur metabolic process	2/174	11/18903	0.00438736730071374	0.0226081276752626	0.014258628270942	PDK1/PDK2	2	0.181818181818182
GO:0046501	BP	GO:0046501	protoporphyrinogen IX metabolic process	2/174	11/18903	0.00438736730071374	0.0226081276752626	0.014258628270942	FECH/ALAD	2	0.181818181818182
GO:0060439	BP	GO:0060439	trachea morphogenesis	2/174	11/18903	0.00438736730071374	0.0226081276752626	0.014258628270942	MAP2K1/MAPK1	2	0.181818181818182
GO:0060601	BP	GO:0060601	lateral sprouting from an epithelium	2/174	11/18903	0.00438736730071374	0.0226081276752626	0.014258628270942	FGFR2/AR	2	0.181818181818182
GO:0060742	BP	GO:0060742	epithelial cell differentiation involved in prostate gland development	2/174	11/18903	0.00438736730071374	0.0226081276752626	0.014258628270942	FGFR2/AR	2	0.181818181818182
GO:0071394	BP	GO:0071394	cellular response to testosterone stimulus	2/174	11/18903	0.00438736730071374	0.0226081276752626	0.014258628270942	IGF1R/AR	2	0.181818181818182
GO:0071803	BP	GO:0071803	positive regulation of podosome assembly	2/174	11/18903	0.00438736730071374	0.0226081276752626	0.014258628270942	RHOA/SRC	2	0.181818181818182
GO:0072584	BP	GO:0072584	caveolin-mediated endocytosis	2/174	11/18903	0.00438736730071374	0.0226081276752626	0.014258628270942	MAPK1/SRC	2	0.181818181818182
GO:0008645	BP	GO:0008645	hexose transmembrane transport	5/174	116/18903	0.00439917713369821	0.0226380575011046	0.0142775045913089	AKT1/FABP5/INSR/PPARD/MAPK14	5	0.0431034482758621
GO:0044843	BP	GO:0044843	cell cycle G1/S phase transition	8/174	280/18903	0.00448659111459264	0.0230564328123208	0.0145413680180401	AKT1/EIF4E/CDK7/MDM2/CCNA2/CDK6/EGFR/CDK2	8	0.0285714285714286
GO:0030099	BP	GO:0030099	myeloid cell differentiation	10/174	407/18903	0.00454005990095569	0.023285571855132	0.0146858827908127	GLO1/CDC42/PARP1/GP1BA/CDK6/STAT1/CASP3/SRC/APCS/MAPK14	10	0.0245700245700246
GO:0044270	BP	GO:0044270	cellular nitrogen compound catabolic process	11/174	474/18903	0.00454540431653823	0.023285571855132	0.0146858827908127	AKT1/BLVRB/AHCY/PDE4B/ACAT1/FHIT/HINT1/ISG20/PNP/RNASE3/MAPK14	11	0.0232067510548523
GO:0009206	BP	GO:0009206	purine ribonucleoside triphosphate biosynthetic process	5/174	117/18903	0.00456204602357969	0.023285571855132	0.0146858827908127	PARP1/IMPDH2/IMPDH1/PPARA/PKLR	5	0.0427350427350427
GO:0021987	BP	GO:0021987	cerebral cortex development	5/174	117/18903	0.00456204602357969	0.023285571855132	0.0146858827908127	GSK3B/ATIC/GART/RHOA/EGFR	5	0.0427350427350427
GO:0071887	BP	GO:0071887	leukocyte apoptotic process	5/174	117/18903	0.00456204602357969	0.023285571855132	0.0146858827908127	ARG2/AKT1/MIF/LGALS3/CASP3	5	0.0427350427350427
GO:0000271	BP	GO:0000271	polysaccharide biosynthetic process	4/174	73/18903	0.0046079563409496	0.0234564255304479	0.0147936378017559	AKT1/INSR/ACADM/GSK3B	4	0.0547945205479452
GO:0045665	BP	GO:0045665	negative regulation of neuron differentiation	4/174	73/18903	0.0046079563409496	0.0234564255304479	0.0147936378017559	EIF4E/GSK3B/DDX6/RHOA	4	0.0547945205479452
GO:0048639	BP	GO:0048639	positive regulation of developmental growth	6/174	168/18903	0.00467030371070752	0.0237417595644053	0.0149735939653837	AKT1/INSR/ERBB4/FGFR2/PPARD/MAPK14	6	0.0357142857142857
GO:0006805	BP	GO:0006805	xenobiotic metabolic process	5/174	118/18903	0.00472916314072399	0.0237431152816043	0.0149744489971607	NQO1/CBR1/CYP2C9/CES2/GSTO1	5	0.0423728813559322
GO:0003230	BP	GO:0003230	cardiac atrium development	3/174	37/18903	0.00473351609007594	0.0237431152816043	0.0149744489971607	IGF1R/MDM2/TGFB2	3	0.0810810810810811
GO:0006734	BP	GO:0006734	NADH metabolic process	3/174	37/18903	0.00473351609007594	0.0237431152816043	0.0149744489971607	NQO1/HK1/TPI1	3	0.0810810810810811
GO:0046326	BP	GO:0046326	positive regulation of glucose import	3/174	37/18903	0.00473351609007594	0.0237431152816043	0.0149744489971607	AKT1/INSR/MAPK14	3	0.0810810810810811
GO:0051385	BP	GO:0051385	response to mineralocorticoid	3/174	37/18903	0.00473351609007594	0.0237431152816043	0.0149744489971607	IGF1R/PARP1/SRC	3	0.0810810810810811
GO:0055023	BP	GO:0055023	positive regulation of cardiac muscle tissue growth	3/174	37/18903	0.00473351609007594	0.0237431152816043	0.0149744489971607	ERBB4/FGFR2/MAPK14	3	0.0810810810810811
GO:0060416	BP	GO:0060416	response to growth hormone	3/174	37/18903	0.00473351609007594	0.0237431152816043	0.0149744489971607	AKT1/PTPN1/PTK2	3	0.0810810810810811
GO:0071312	BP	GO:0071312	cellular response to alkaloid	3/174	37/18903	0.00473351609007594	0.0237431152816043	0.0149744489971607	CASP7/CCNA2/CASP3	3	0.0810810810810811
GO:0072528	BP	GO:0072528	pyrimidine-containing compound biosynthetic process	3/174	37/18903	0.00473351609007594	0.0237431152816043	0.0149744489971607	UMPS/DTYMK/DHODH	3	0.0810810810810811
GO:1902745	BP	GO:1902745	positive regulation of lamellipodium organization	3/174	37/18903	0.00473351609007594	0.0237431152816043	0.0149744489971607	CDC42/SRC/HSP90AA1	3	0.0810810810810811
GO:0002262	BP	GO:0002262	myeloid cell homeostasis	6/174	169/18903	0.00480613505959782	0.0240753538443599	0.0151839871876579	PDE4B/CDK6/STAT1/CASP3/MTHFD1/MAPK14	6	0.0355029585798817
GO:0001736	BP	GO:0001736	establishment of planar polarity	4/174	74/18903	0.00483688271797911	0.02413322964579	0.0152204886419281	CDC42/ABL1/ERBB4/RHOA	4	0.0540540540540541
GO:0007164	BP	GO:0007164	establishment of tissue polarity	4/174	74/18903	0.00483688271797911	0.02413322964579	0.0152204886419281	CDC42/ABL1/ERBB4/RHOA	4	0.0540540540540541
GO:0035924	BP	GO:0035924	cellular response to vascular endothelial growth factor stimulus	4/174	74/18903	0.00483688271797911	0.02413322964579	0.0152204886419281	AKT1/PGF/KDR/MAPK14	4	0.0540540540540541
GO:0015749	BP	GO:0015749	monosaccharide transmembrane transport	5/174	119/18903	0.00490058778703356	0.0244187808886269	0.0154005817961425	AKT1/FABP5/INSR/PPARD/MAPK14	5	0.0420168067226891
GO:0032890	BP	GO:0032890	regulation of organic acid transport	4/174	75/18903	0.00507332781645662	0.0251525649988365	0.0158633691179802	AKT1/MIF/PPARA/FABP3	4	0.0533333333333333
GO:0050810	BP	GO:0050810	regulation of steroid biosynthetic process	4/174	75/18903	0.00507332781645662	0.0251525649988365	0.0158633691179802	IGF1R/NR1H4/SEC14L2/AKR1C3	4	0.0533333333333333
GO:0050818	BP	GO:0050818	regulation of coagulation	4/174	75/18903	0.00507332781645662	0.0251525649988365	0.0158633691179802	GP1BA/ANXA5/FGG/PLAU	4	0.0533333333333333
GO:0042752	BP	GO:0042752	regulation of circadian rhythm	5/174	120/18903	0.00507637907338981	0.0251525649988365	0.0158633691179802	PARP1/MAPK8/GSK3B/PPARA/NR1H3	5	0.0416666666666667
GO:0010742	BP	GO:0010742	macrophage derived foam cell differentiation	3/174	38/18903	0.0051048779177693	0.0251525649988365	0.0158633691179802	PPARA/STAT1/NR1H3	3	0.0789473684210526
GO:0032885	BP	GO:0032885	regulation of polysaccharide biosynthetic process	3/174	38/18903	0.0051048779177693	0.0251525649988365	0.0158633691179802	AKT1/INSR/GSK3B	3	0.0789473684210526
GO:0048009	BP	GO:0048009	insulin-like growth factor receptor signaling pathway	3/174	38/18903	0.0051048779177693	0.0251525649988365	0.0158633691179802	AKT1/IGF1R/AR	3	0.0789473684210526
GO:0140448	BP	GO:0140448	signaling receptor ligand precursor processing	3/174	38/18903	0.0051048779177693	0.0251525649988365	0.0158633691179802	DPP4/MME/CTSG	3	0.0789473684210526
GO:0050727	BP	GO:0050727	regulation of inflammatory response	10/174	414/18903	0.00510786447219213	0.0251525649988365	0.0158633691179802	XIAP/NR1H4/MMP8/PPARA/SELE/NR1H3/PPARD/SRC/APCS/MAPK14	10	0.0241545893719807
GO:0010876	BP	GO:0010876	lipid localization	11/174	483/18903	0.00522088809884355	0.025339268176521	0.0159811201872349	AKT1/FABP5/MIF/PITPNA/HEXB/RXRA/PPARA/NR1H3/GM2A/PPARD/FABP3	11	0.0227743271221532
GO:1905475	BP	GO:1905475	regulation of protein localization to membrane	6/174	172/18903	0.00523108834477271	0.025339268176521	0.0159811201872349	AKT1/CSK/LGALS3/MAPK8/EGFR/AR	6	0.0348837209302326
GO:0009086	BP	GO:0009086	methionine biosynthetic process	2/174	12/18903	0.0052331097321076	0.025339268176521	0.0159811201872349	MTHFD1/MTAP	2	0.166666666666667
GO:0010749	BP	GO:0010749	regulation of nitric oxide mediated signal transduction	2/174	12/18903	0.0052331097321076	0.025339268176521	0.0159811201872349	CBS/EGFR	2	0.166666666666667
GO:0033145	BP	GO:0033145	positive regulation of intracellular steroid hormone receptor signaling pathway	2/174	12/18903	0.0052331097321076	0.025339268176521	0.0159811201872349	PARP1/AR	2	0.166666666666667
GO:0033539	BP	GO:0033539	fatty acid beta-oxidation using acyl-CoA dehydrogenase	2/174	12/18903	0.0052331097321076	0.025339268176521	0.0159811201872349	ACADM/GCDH	2	0.166666666666667
GO:0042416	BP	GO:0042416	dopamine biosynthetic process	2/174	12/18903	0.0052331097321076	0.025339268176521	0.0159811201872349	ALDH2/TGFB2	2	0.166666666666667
GO:0048548	BP	GO:0048548	regulation of pinocytosis	2/174	12/18903	0.0052331097321076	0.025339268176521	0.0159811201872349	CDC42/NR1H3	2	0.166666666666667
GO:0060736	BP	GO:0060736	prostate gland growth	2/174	12/18903	0.0052331097321076	0.025339268176521	0.0159811201872349	FGFR2/AR	2	0.166666666666667
GO:0061517	BP	GO:0061517	macrophage proliferation	2/174	12/18903	0.0052331097321076	0.025339268176521	0.0159811201872349	MAPK1/PTK2	2	0.166666666666667
GO:0150065	BP	GO:0150065	regulation of deacetylase activity	2/174	12/18903	0.0052331097321076	0.025339268176521	0.0159811201872349	MAPK8/FNTA	2	0.166666666666667
GO:1901030	BP	GO:1901030	positive regulation of mitochondrial outer membrane permeabilization involved in apoptotic signaling pathway	2/174	12/18903	0.0052331097321076	0.025339268176521	0.0159811201872349	MAPK8/GSK3B	2	0.166666666666667
GO:1903800	BP	GO:1903800	positive regulation of miRNA maturation	2/174	12/18903	0.0052331097321076	0.025339268176521	0.0159811201872349	MAP2K1/EGFR	2	0.166666666666667
GO:0032355	BP	GO:0032355	response to estradiol	5/174	121/18903	0.00525659590579153	0.0254203586623662	0.0160322628165842	NQO1/IGF1R/CCNA2/CASP3/EGFR	5	0.0413223140495868
GO:0007548	BP	GO:0007548	sex differentiation	8/174	288/18903	0.00530075557014255	0.0256010883618152	0.0161462464970984	INSR/CTNNA1/AKR1C3/CASP3/TGFB2/SRC/KDR/AR	8	0.0277777777777778
GO:0060420	BP	GO:0060420	regulation of heart growth	4/174	76/18903	0.00531740095262091	0.0256486398891126	0.0161762365768249	ERBB4/PPARA/FGFR2/MAPK14	4	0.0526315789473684
GO:0072331	BP	GO:0072331	signal transduction by p53 class mediator	6/174	173/18903	0.00537867867602689	0.0259110804163135	0.0163417541276074	AKT1/MIF/MDM2/FHIT/HINT1/PDK2	6	0.0346820809248555
GO:0006730	BP	GO:0006730	one-carbon metabolic process	3/174	39/18903	0.00549331777444417	0.0262954246766541	0.0165841546490032	AHCY/CA12/MTHFD1	3	0.0769230769230769
GO:0032350	BP	GO:0032350	regulation of hormone metabolic process	3/174	39/18903	0.00549331777444417	0.0262954246766541	0.0165841546490032	HPN/IGF1R/AKR1C3	3	0.0769230769230769
GO:0044273	BP	GO:0044273	sulfur compound catabolic process	3/174	39/18903	0.00549331777444417	0.0262954246766541	0.0165841546490032	AHCY/CBS/ACAT1	3	0.0769230769230769
GO:0090077	BP	GO:0090077	foam cell differentiation	3/174	39/18903	0.00549331777444417	0.0262954246766541	0.0165841546490032	PPARA/STAT1/NR1H3	3	0.0769230769230769
GO:0090181	BP	GO:0090181	regulation of cholesterol metabolic process	3/174	39/18903	0.00549331777444417	0.0262954246766541	0.0165841546490032	EPHX2/NR1H4/SEC14L2	3	0.0769230769230769
GO:0010827	BP	GO:0010827	regulation of glucose transmembrane transport	4/174	77/18903	0.00556921004209362	0.0266249179705667	0.0167919614370377	AKT1/FABP5/INSR/MAPK14	4	0.051948051948052
GO:0009201	BP	GO:0009201	ribonucleoside triphosphate biosynthetic process	5/174	123/18903	0.00563054072644334	0.0268840501520814	0.0169553924607088	PARP1/IMPDH2/IMPDH1/PPARA/PKLR	5	0.040650406504065
GO:0010632	BP	GO:0010632	regulation of epithelial cell migration	8/174	292/18903	0.00574799445076607	0.0274101581141462	0.0172872013556874	AKT1/RAB11A/ABL1/TGFB2/PTK2/RHOA/SRC/KDR	8	0.0273972602739726
GO:0061564	BP	GO:0061564	axon development	11/174	490/18903	0.00579936849123299	0.0275865318089282	0.0173984377653005	MAP2K1/IGF1R/ABL1/CTNNA1/GSK3B/CASP3/FGFR2/PTK2/EPHB4/HSP90AA1/RTN4R	11	0.0224489795918367
GO:0046660	BP	GO:0046660	female sex differentiation	5/174	124/18903	0.00582438538012941	0.0275865318089282	0.0173984377653005	INSR/CTNNA1/CASP3/SRC/KDR	5	0.0403225806451613
GO:0051209	BP	GO:0051209	release of sequestered calcium ion into cytosol	5/174	124/18903	0.00582438538012941	0.0275865318089282	0.0173984377653005	ABL1/FKBP1A/PRKACA/GP1BA/GSTO1	5	0.0403225806451613
GO:0043154	BP	GO:0043154	negative regulation of cysteine-type endopeptidase activity involved in apoptotic process	4/174	78/18903	0.00582886157256515	0.0275865318089282	0.0173984377653005	AKT1/XIAP/CSNK2A1/SRC	4	0.0512820512820513
GO:0055117	BP	GO:0055117	regulation of cardiac muscle contraction	4/174	78/18903	0.00582886157256515	0.0275865318089282	0.0173984377653005	PDE4B/PRKACA/GSTO1/HSP90AA1	4	0.0512820512820513
GO:0061045	BP	GO:0061045	negative regulation of wound healing	4/174	78/18903	0.00582886157256515	0.0275865318089282	0.0173984377653005	GP1BA/FGG/APCS/PLAU	4	0.0512820512820513
GO:0045923	BP	GO:0045923	positive regulation of fatty acid metabolic process	3/174	40/18903	0.00589904288418003	0.0277792631200088	0.0175199906935368	PPARA/NR1H3/PPARD	3	0.075
GO:0071392	BP	GO:0071392	cellular response to estradiol stimulus	3/174	40/18903	0.00589904288418003	0.0277792631200088	0.0175199906935368	IGF1R/CCNA2/EGFR	3	0.075
GO:1901532	BP	GO:1901532	regulation of hematopoietic progenitor cell differentiation	3/174	40/18903	0.00589904288418003	0.0277792631200088	0.0175199906935368	ABL1/CDK6/KDR	3	0.075
GO:1990000	BP	GO:1990000	amyloid fibril formation	3/174	40/18903	0.00589904288418003	0.0277792631200088	0.0175199906935368	FKBP1A/MDM2/BACE1	3	0.075
GO:0051283	BP	GO:0051283	negative regulation of sequestering of calcium ion	5/174	125/18903	0.00602288888432386	0.0282918267393146	0.017843257361961	ABL1/FKBP1A/PRKACA/GP1BA/GSTO1	5	0.04
GO:1904375	BP	GO:1904375	regulation of protein localization to cell periphery	5/174	125/18903	0.00602288888432386	0.0282918267393146	0.017843257361961	AKT1/CSK/LGALS3/EGFR/AR	5	0.04
GO:0006534	BP	GO:0006534	cysteine metabolic process	2/174	13/18903	0.00614733743495381	0.0286268602526491	0.0180545582884933	CBS/MTHFD1	2	0.153846153846154
GO:0007183	BP	GO:0007183	SMAD protein complex assembly	2/174	13/18903	0.00614733743495381	0.0286268602526491	0.0180545582884933	FKBP1A/PARP1	2	0.153846153846154
GO:0009437	BP	GO:0009437	carnitine metabolic process	2/174	13/18903	0.00614733743495381	0.0286268602526491	0.0180545582884933	CRAT/ACADM	2	0.153846153846154
GO:0010745	BP	GO:0010745	negative regulation of macrophage derived foam cell differentiation	2/174	13/18903	0.00614733743495381	0.0286268602526491	0.0180545582884933	PPARA/NR1H3	2	0.153846153846154
GO:0033690	BP	GO:0033690	positive regulation of osteoblast proliferation	2/174	13/18903	0.00614733743495381	0.0286268602526491	0.0180545582884933	IGF1R/ABL1	2	0.153846153846154
GO:0044650	BP	GO:0044650	adhesion of symbiont to host cell	2/174	13/18903	0.00614733743495381	0.0286268602526491	0.0180545582884933	DPP4/CD209	2	0.153846153846154
GO:0051036	BP	GO:0051036	regulation of endosome size	2/174	13/18903	0.00614733743495381	0.0286268602526491	0.0180545582884933	RAB11A/RAB5A	2	0.153846153846154
GO:0002691	BP	GO:0002691	regulation of cellular extravasation	3/174	41/18903	0.00632225031901808	0.0293688770977047	0.0185225378804522	GP1BA/SELE/SELP	3	0.0731707317073171
GO:0060421	BP	GO:0060421	positive regulation of heart growth	3/174	41/18903	0.00632225031901808	0.0293688770977047	0.0185225378804522	ERBB4/FGFR2/MAPK14	3	0.0731707317073171
GO:0070227	BP	GO:0070227	lymphocyte apoptotic process	4/174	80/18903	0.00637211061272307	0.0295277656402843	0.0186227466503998	ARG2/AKT1/MIF/LGALS3	4	0.05
GO:1903201	BP	GO:1903201	regulation of oxidative stress-induced cell death	4/174	80/18903	0.00637211061272307	0.0295277656402843	0.0186227466503998	AKT1/ABL1/PPIA/PARP1	4	0.05
GO:0034655	BP	GO:0034655	nucleobase-containing compound catabolic process	10/174	428/18903	0.00641006994584381	0.0296672194303348	0.0187106981951657	AKT1/AHCY/PDE4B/ACAT1/FHIT/HINT1/ISG20/PNP/RNASE3/MAPK14	10	0.0233644859813084
GO:0001704	BP	GO:0001704	formation of primary germ layer	5/174	127/18903	0.00643410288099508	0.02966923724586	0.0187119708030484	MAP2K1/GRB2/PRKACA/MMP8/FGFR2	5	0.0393700787401575
GO:0002688	BP	GO:0002688	regulation of leukocyte chemotaxis	5/174	127/18903	0.00643410288099508	0.02966923724586	0.0187119708030484	DPP4/MIF/MAPK1/PTK2/PGF	5	0.0393700787401575
GO:0051282	BP	GO:0051282	regulation of sequestering of calcium ion	5/174	127/18903	0.00643410288099508	0.02966923724586	0.0187119708030484	ABL1/FKBP1A/PRKACA/GP1BA/GSTO1	5	0.0393700787401575
GO:0034329	BP	GO:0034329	cell junction assembly	10/174	430/18903	0.00661546790366433	0.0304683088310401	0.0192159340174557	CDC42/ABL1/CTNNA1/NR1H4/ERBB4/PRKACA/PTK2/RHOA/SRC/KDR	10	0.0232558139534884
GO:0010833	BP	GO:0010833	telomere maintenance via telomere lengthening	4/174	81/18903	0.00665591373018445	0.0306172031588485	0.0193098395766584	PARP1/MAPK1/SRC/HSP90AA1	4	0.0493827160493827
GO:0043409	BP	GO:0043409	negative regulation of MAPK cascade	6/174	181/18903	0.00667146298964412	0.0306513500571713	0.01933137554535	HMGCR/IGF1R/CSK/ABL1/PPIA/PTPN1	6	0.0331491712707182
GO:0010463	BP	GO:0010463	mesenchymal cell proliferation	3/174	42/18903	0.00676312720994093	0.0308470566334911	0.0194548049315427	STAT1/FGFR2/KDR	3	0.0714285714285714
GO:0019320	BP	GO:0019320	hexose catabolic process	3/174	42/18903	0.00676312720994093	0.0308470566334911	0.0194548049315427	HK1/GALE/TPI1	3	0.0714285714285714
GO:0021587	BP	GO:0021587	cerebellum morphogenesis	3/174	42/18903	0.00676312720994093	0.0308470566334911	0.0194548049315427	MAP2K1/CBS/ABL1	3	0.0714285714285714
GO:0031670	BP	GO:0031670	cellular response to nutrient	3/174	42/18903	0.00676312720994093	0.0308470566334911	0.0194548049315427	NR1H4/RXRA/PDK2	3	0.0714285714285714
GO:0050691	BP	GO:0050691	regulation of defense response to virus by host	3/174	42/18903	0.00676312720994093	0.0308470566334911	0.0194548049315427	STAT1/HSP90AA1/MMP12	3	0.0714285714285714
GO:1900274	BP	GO:1900274	regulation of phospholipase C activity	3/174	42/18903	0.00676312720994093	0.0308470566334911	0.0194548049315427	ABL1/SELE/EGFR	3	0.0714285714285714
GO:0051054	BP	GO:0051054	positive regulation of DNA metabolic process	8/174	301/18903	0.00685920129152822	0.0312345290983061	0.0196991783675202	AKT1/IGF1R/PARP1/MAPK1/SRC/EGFR/CDK2/HSP90AA1	8	0.026578073089701
GO:0050714	BP	GO:0050714	positive regulation of protein secretion	5/174	129/18903	0.00686464067404448	0.0312345290983061	0.0196991783675202	PPIA/NR1H4/TGFB2/PPARD/FGG	5	0.0387596899224806
GO:0045088	BP	GO:0045088	regulation of innate immune response	7/174	240/18903	0.00690521368332839	0.0313489767569623	0.0197713588967837	XIAP/PARP1/PTPN1/NR1H3/SRC/HSP90AA1/MMP12	7	0.0291666666666667
GO:0006869	BP	GO:0006869	lipid transport	10/174	433/18903	0.00693313075944434	0.0313489767569623	0.0197713588967837	AKT1/FABP5/MIF/PITPNA/RXRA/PPARA/NR1H3/GM2A/PPARD/FABP3	10	0.023094688221709
GO:0021766	BP	GO:0021766	hippocampus development	4/174	82/18903	0.00694797045832993	0.0313489767569623	0.0197713588967837	IGF1R/GSK3B/CDK6/CASP3	4	0.0487804878048781
GO:0048708	BP	GO:0048708	astrocyte differentiation	4/174	82/18903	0.00694797045832993	0.0313489767569623	0.0197713588967837	MAP2K1/ABL1/MAPK1/CDK6	4	0.0487804878048781
GO:0051279	BP	GO:0051279	regulation of release of sequestered calcium ion into cytosol	4/174	82/18903	0.00694797045832993	0.0313489767569623	0.0197713588967837	ABL1/FKBP1A/PRKACA/GSTO1	4	0.0487804878048781
GO:0072527	BP	GO:0072527	pyrimidine-containing compound metabolic process	4/174	82/18903	0.00694797045832993	0.0313489767569623	0.0197713588967837	UMPS/MAPK1/DTYMK/DHODH	4	0.0487804878048781
GO:2000736	BP	GO:2000736	regulation of stem cell differentiation	4/174	82/18903	0.00694797045832993	0.0313489767569623	0.0197713588967837	ABL1/GSK3B/CDK6/TGFB2	4	0.0487804878048781
GO:0019079	BP	GO:0019079	viral genome replication	5/174	130/18903	0.00708729776533396	0.0317094101772701	0.0199986791875399	PPIA/HSPA8/ISG20/PPARA/CD209	5	0.0384615384615385
GO:0042542	BP	GO:0042542	response to hydrogen peroxide	5/174	130/18903	0.00708729776533396	0.0317094101772701	0.0199986791875399	NQO1/ABL1/STAT1/CASP3/SRC	5	0.0384615384615385
GO:1990266	BP	GO:1990266	neutrophil migration	5/174	130/18903	0.00708729776533396	0.0317094101772701	0.0199986791875399	DPP4/PDE4B/LGALS3/PPIA/TGFB2	5	0.0384615384615385
GO:0006563	BP	GO:0006563	L-serine metabolic process	2/174	14/18903	0.0071287327227797	0.0317094101772701	0.0199986791875399	CBS/SDS	2	0.142857142857143
GO:0006596	BP	GO:0006596	polyamine biosynthetic process	2/174	14/18903	0.0071287327227797	0.0317094101772701	0.0199986791875399	AMD1/SRM	2	0.142857142857143
GO:0009313	BP	GO:0009313	oligosaccharide catabolic process	2/174	14/18903	0.0071287327227797	0.0317094101772701	0.0199986791875399	HEXB/GM2A	2	0.142857142857143
GO:0030238	BP	GO:0030238	male sex determination	2/174	14/18903	0.0071287327227797	0.0317094101772701	0.0199986791875399	INSR/AR	2	0.142857142857143
GO:0046049	BP	GO:0046049	UMP metabolic process	2/174	14/18903	0.0071287327227797	0.0317094101772701	0.0199986791875399	UMPS/DHODH	2	0.142857142857143
GO:0050667	BP	GO:0050667	homocysteine metabolic process	2/174	14/18903	0.0071287327227797	0.0317094101772701	0.0199986791875399	CBS/MTHFD1	2	0.142857142857143
GO:0070816	BP	GO:0070816	phosphorylation of RNA polymerase II C-terminal domain	2/174	14/18903	0.0071287327227797	0.0317094101772701	0.0199986791875399	CDK7/CCNT1	2	0.142857142857143
GO:0071801	BP	GO:0071801	regulation of podosome assembly	2/174	14/18903	0.0071287327227797	0.0317094101772701	0.0199986791875399	RHOA/SRC	2	0.142857142857143
GO:1904044	BP	GO:1904044	response to aldosterone	2/174	14/18903	0.0071287327227797	0.0317094101772701	0.0199986791875399	IGF1R/PARP1	2	0.142857142857143
GO:0007595	BP	GO:0007595	lactation	3/174	43/18903	0.00722185095448867	0.0320103663928687	0.0201884880414922	APRT/UMPS/ERBB4	3	0.0697674418604651
GO:0042789	BP	GO:0042789	mRNA transcription by RNA polymerase II	3/174	43/18903	0.00722185095448867	0.0320103663928687	0.0201884880414922	THRB/RXRA/NR1H3	3	0.0697674418604651
GO:0071364	BP	GO:0071364	cellular response to epidermal growth factor stimulus	3/174	43/18903	0.00722185095448867	0.0320103663928687	0.0201884880414922	AKT1/ERBB4/EGFR	3	0.0697674418604651
GO:0051208	BP	GO:0051208	sequestering of calcium ion	5/174	131/18903	0.00731495527938677	0.0323849898049846	0.0204247577605808	ABL1/FKBP1A/PRKACA/GP1BA/GSTO1	5	0.0381679389312977
GO:0002040	BP	GO:0002040	sprouting angiogenesis	6/174	185/18903	0.00739627225906249	0.0326947697928954	0.0206201316436746	AKT1/ABL1/PGF/RHOA/EPHB4/KDR	6	0.0324324324324324
GO:0046651	BP	GO:0046651	lymphocyte proliferation	8/174	305/18903	0.00740226230199699	0.0326947697928954	0.0206201316436746	ARG2/MIF/ABL1/LGALS3/IMPDH2/PNP/CASP3/CD209	8	0.0262295081967213
GO:0034219	BP	GO:0034219	carbohydrate transmembrane transport	5/174	132/18903	0.00754766900788512	0.0332236665797202	0.0209536994112206	AKT1/FABP5/INSR/PPARD/MAPK14	5	0.0378787878787879
GO:0048565	BP	GO:0048565	digestive tract development	5/174	132/18903	0.00754766900788512	0.0332236665797202	0.0209536994112206	RARB/FGFR2/TGFB2/SRC/EGFR	5	0.0378787878787879
GO:0010921	BP	GO:0010921	regulation of phosphatase activity	4/174	84/18903	0.00755723911065747	0.0332236665797202	0.0209536994112206	LGALS3/FKBP1A/GSK3B/TGFB2	4	0.0476190476190476
GO:0051899	BP	GO:0051899	membrane depolarization	4/174	84/18903	0.00755723911065747	0.0332236665797202	0.0209536994112206	ABL1/PARP1/SRC/KDR	4	0.0476190476190476
GO:0009266	BP	GO:0009266	response to temperature stimulus	6/174	186/18903	0.00758602740072456	0.0333114032078382	0.0210090336690613	AKT1/ACADM/GSK3B/PRKACA/HSP90AA1/PKLR	6	0.032258064516129
GO:0009394	BP	GO:0009394	2'-deoxyribonucleotide metabolic process	3/174	44/18903	0.00769858942105837	0.0335324241295984	0.0211484284570219	ADK/PNP/DTYMK	3	0.0681818181818182
GO:0010828	BP	GO:0010828	positive regulation of glucose transmembrane transport	3/174	44/18903	0.00769858942105837	0.0335324241295984	0.0211484284570219	AKT1/INSR/MAPK14	3	0.0681818181818182
GO:0032881	BP	GO:0032881	regulation of polysaccharide metabolic process	3/174	44/18903	0.00769858942105837	0.0335324241295984	0.0211484284570219	AKT1/INSR/GSK3B	3	0.0681818181818182
GO:0042181	BP	GO:0042181	ketone biosynthetic process	3/174	44/18903	0.00769858942105837	0.0335324241295984	0.0211484284570219	AKR1C3/HSD17B1/TPI1	3	0.0681818181818182
GO:0044275	BP	GO:0044275	cellular carbohydrate catabolic process	3/174	44/18903	0.00769858942105837	0.0335324241295984	0.0211484284570219	SORD/PYGL/TPI1	3	0.0681818181818182
GO:1900026	BP	GO:1900026	positive regulation of substrate adhesion-dependent cell spreading	3/174	44/18903	0.00769858942105837	0.0335324241295984	0.0211484284570219	CDC42/ABL1/FGG	3	0.0681818181818182
GO:1905521	BP	GO:1905521	regulation of macrophage migration	3/174	44/18903	0.00769858942105837	0.0335324241295984	0.0211484284570219	MIF/MAPK1/PTK2	3	0.0681818181818182
GO:0043467	BP	GO:0043467	regulation of generation of precursor metabolites and energy	5/174	134/18903	0.00802848648218634	0.034647854638504	0.0218519147968463	AKT1/INSR/GSK3B/PPARA/RHOA	5	0.0373134328358209
GO:0060070	BP	GO:0060070	canonical Wnt signaling pathway	8/174	310/18903	0.00812602030997761	0.034647854638504	0.0218519147968463	XIAP/RAB5A/GSK3B/FGFR2/CSNK1G2/SRC/EGFR/MAPK14	8	0.0258064516129032
GO:0009071	BP	GO:0009071	serine family amino acid catabolic process	2/174	15/18903	0.00817599612162935	0.034647854638504	0.0218519147968463	CBS/SDS	2	0.133333333333333
GO:0009173	BP	GO:0009173	pyrimidine ribonucleoside monophosphate metabolic process	2/174	15/18903	0.00817599612162935	0.034647854638504	0.0218519147968463	UMPS/DHODH	2	0.133333333333333
GO:0032352	BP	GO:0032352	positive regulation of hormone metabolic process	2/174	15/18903	0.00817599612162935	0.034647854638504	0.0218519147968463	HPN/IGF1R	2	0.133333333333333
GO:0032488	BP	GO:0032488	Cdc42 protein signal transduction	2/174	15/18903	0.00817599612162935	0.034647854638504	0.0218519147968463	CDC42/ABL1	2	0.133333333333333
GO:0034310	BP	GO:0034310	primary alcohol catabolic process	2/174	15/18903	0.00817599612162935	0.034647854638504	0.0218519147968463	ALDH2/AKR1C3	2	0.133333333333333
GO:0042182	BP	GO:0042182	ketone catabolic process	2/174	15/18903	0.00817599612162935	0.034647854638504	0.0218519147968463	HAGH/NQO2	2	0.133333333333333
GO:0043518	BP	GO:0043518	negative regulation of DNA damage response, signal transduction by p53 class mediator	2/174	15/18903	0.00817599612162935	0.034647854638504	0.0218519147968463	MIF/MDM2	2	0.133333333333333
GO:0045725	BP	GO:0045725	positive regulation of glycogen biosynthetic process	2/174	15/18903	0.00817599612162935	0.034647854638504	0.0218519147968463	AKT1/INSR	2	0.133333333333333
GO:0045989	BP	GO:0045989	positive regulation of striated muscle contraction	2/174	15/18903	0.00817599612162935	0.034647854638504	0.0218519147968463	GSTO1/HSP90AA1	2	0.133333333333333
GO:0046479	BP	GO:0046479	glycosphingolipid catabolic process	2/174	15/18903	0.00817599612162935	0.034647854638504	0.0218519147968463	HEXB/GM2A	2	0.133333333333333
GO:0046500	BP	GO:0046500	S-adenosylmethionine metabolic process	2/174	15/18903	0.00817599612162935	0.034647854638504	0.0218519147968463	AMD1/AHCY	2	0.133333333333333
GO:0048308	BP	GO:0048308	organelle inheritance	2/174	15/18903	0.00817599612162935	0.034647854638504	0.0218519147968463	MAP2K1/MAPK1	2	0.133333333333333
GO:0048313	BP	GO:0048313	Golgi inheritance	2/174	15/18903	0.00817599612162935	0.034647854638504	0.0218519147968463	MAP2K1/MAPK1	2	0.133333333333333
GO:0051791	BP	GO:0051791	medium-chain fatty acid metabolic process	2/174	15/18903	0.00817599612162935	0.034647854638504	0.0218519147968463	CRAT/ACADM	2	0.133333333333333
GO:0060572	BP	GO:0060572	morphogenesis of an epithelial bud	2/174	15/18903	0.00817599612162935	0.034647854638504	0.0218519147968463	FGFR2/AR	2	0.133333333333333
GO:0061307	BP	GO:0061307	cardiac neural crest cell differentiation involved in heart development	2/174	15/18903	0.00817599612162935	0.034647854638504	0.0218519147968463	CDC42/MAPK1	2	0.133333333333333
GO:0061308	BP	GO:0061308	cardiac neural crest cell development involved in heart development	2/174	15/18903	0.00817599612162935	0.034647854638504	0.0218519147968463	CDC42/MAPK1	2	0.133333333333333
GO:1903727	BP	GO:1903727	positive regulation of phospholipid metabolic process	2/174	15/18903	0.00817599612162935	0.034647854638504	0.0218519147968463	NR1H4/FABP3	2	0.133333333333333
GO:0003254	BP	GO:0003254	regulation of membrane depolarization	3/174	45/18903	0.00819350114993254	0.034647854638504	0.0218519147968463	PARP1/SRC/KDR	3	0.0666666666666667
GO:0006775	BP	GO:0006775	fat-soluble vitamin metabolic process	3/174	45/18903	0.00819350114993254	0.034647854638504	0.0218519147968463	NQO1/CBR1/PPARD	3	0.0666666666666667
GO:0009262	BP	GO:0009262	deoxyribonucleotide metabolic process	3/174	45/18903	0.00819350114993254	0.034647854638504	0.0218519147968463	ADK/PNP/DTYMK	3	0.0666666666666667
GO:0019692	BP	GO:0019692	deoxyribose phosphate metabolic process	3/174	45/18903	0.00819350114993254	0.034647854638504	0.0218519147968463	ADK/PNP/DTYMK	3	0.0666666666666667
GO:0021575	BP	GO:0021575	hindbrain morphogenesis	3/174	45/18903	0.00819350114993254	0.034647854638504	0.0218519147968463	MAP2K1/CBS/ABL1	3	0.0666666666666667
GO:0030574	BP	GO:0030574	collagen catabolic process	3/174	45/18903	0.00819350114993254	0.034647854638504	0.0218519147968463	MMP7/MMP8/MMP12	3	0.0666666666666667
GO:0032943	BP	GO:0032943	mononuclear cell proliferation	8/174	312/18903	0.00842995326900774	0.0356078205270965	0.0224573517863588	ARG2/MIF/ABL1/LGALS3/IMPDH2/PNP/CASP3/CD209	8	0.0256410256410256
GO:0014910	BP	GO:0014910	regulation of smooth muscle cell migration	4/174	87/18903	0.00853546745413765	0.0360131803545942	0.022713006530497	PPARD/RHOA/SRC/PLAU	4	0.0459770114942529
GO:0000082	BP	GO:0000082	G1/S transition of mitotic cell cycle	7/174	250/18903	0.00854939426382397	0.0360316370537922	0.0227246469111934	AKT1/EIF4E/CDK7/MDM2/CDK6/EGFR/CDK2	7	0.028
GO:0032467	BP	GO:0032467	positive regulation of cytokinesis	3/174	46/18903	0.00870673555108267	0.0364503956700154	0.0229887520830035	CDC42/IGF1R/RHOA	3	0.0652173913043478
GO:0042168	BP	GO:0042168	heme metabolic process	3/174	46/18903	0.00870673555108267	0.0364503956700154	0.0229887520830035	BLVRB/FECH/ALAD	3	0.0652173913043478
GO:0046365	BP	GO:0046365	monosaccharide catabolic process	3/174	46/18903	0.00870673555108267	0.0364503956700154	0.0229887520830035	HK1/GALE/TPI1	3	0.0652173913043478
GO:0055010	BP	GO:0055010	ventricular cardiac muscle tissue morphogenesis	3/174	46/18903	0.00870673555108267	0.0364503956700154	0.0229887520830035	FKBP1A/FGFR2/TGFB2	3	0.0652173913043478
GO:0060443	BP	GO:0060443	mammary gland morphogenesis	3/174	46/18903	0.00870673555108267	0.0364503956700154	0.0229887520830035	FGFR2/SRC/AR	3	0.0652173913043478
GO:1900271	BP	GO:1900271	regulation of long-term synaptic potentiation	3/174	46/18903	0.00870673555108267	0.0364503956700154	0.0229887520830035	MME/ABL1/GSK3B	3	0.0652173913043478
GO:0061041	BP	GO:0061041	regulation of wound healing	5/174	137/18903	0.00878900800702515	0.0367540334839234	0.0231802521833083	GP1BA/PTK2/FGG/APCS/PLAU	5	0.0364963503649635
GO:0031334	BP	GO:0031334	positive regulation of protein-containing complex assembly	6/174	192/18903	0.00879910636877559	0.0367555140897248	0.023181185980571	LGALS3/GRB2/GSK3B/RHOA/SRC/HSP90AA1	6	0.03125
GO:0099177	BP	GO:0099177	regulation of trans-synaptic signaling	10/174	449/18903	0.00883231909651296	0.0368534376460695	0.0232429449908236	FABP5/EIF4E/MME/ABL1/RAB5A/MAPK1/GSK3B/PRKACA/SRC/BACE1	10	0.022271714922049
GO:0032370	BP	GO:0032370	positive regulation of lipid transport	4/174	88/18903	0.00887906903782048	0.0370075673045954	0.0233401523995048	MIF/RXRA/NR1H3/FABP3	4	0.0454545454545455
GO:0042326	BP	GO:0042326	negative regulation of phosphorylation	9/174	381/18903	0.00890046356170129	0.037055793106774	0.0233705677349191	AKT1/HMGCR/KAT2B/CSK/ABL1/PPIA/PTPN1/PPARA/CASP3	9	0.0236220472440945
GO:0002696	BP	GO:0002696	positive regulation of leukocyte activation	10/174	450/18903	0.00896307928926166	0.0372753418733131	0.0235090340552792	DPP4/AKT1/MIF/CSK/ABL1/MMP8/PNP/RHOA/SRC/CD209	10	0.0222222222222222
GO:0001960	BP	GO:0001960	negative regulation of cytokine-mediated signaling pathway	4/174	89/18903	0.0092315836050109	0.0377518918925047	0.0238095874524364	XIAP/NR1H4/NR1H3/MMP12	4	0.0449438202247191
GO:0007589	BP	GO:0007589	body fluid secretion	4/174	89/18903	0.0092315836050109	0.0377518918925047	0.0238095874524364	APRT/UMPS/ERBB4/NR1H3	4	0.0449438202247191
GO:0048678	BP	GO:0048678	response to axon injury	4/174	89/18903	0.0092315836050109	0.0377518918925047	0.0238095874524364	MAP2K1/IGF1R/CTNNA1/RTN4R	4	0.0449438202247191
GO:0045646	BP	GO:0045646	regulation of erythrocyte differentiation	3/174	47/18903	0.00923843309879221	0.0377518918925047	0.0238095874524364	CDK6/STAT1/MAPK14	3	0.0638297872340425
GO:0046677	BP	GO:0046677	response to antibiotic	3/174	47/18903	0.00923843309879221	0.0377518918925047	0.0238095874524364	MDM2/CASP3/HSP90AA1	3	0.0638297872340425
GO:0048286	BP	GO:0048286	lung alveolus development	3/174	47/18903	0.00923843309879221	0.0377518918925047	0.0238095874524364	FGFR2/KDR/MMP12	3	0.0638297872340425
GO:0051972	BP	GO:0051972	regulation of telomerase activity	3/174	47/18903	0.00923843309879221	0.0377518918925047	0.0238095874524364	MAPK1/SRC/HSP90AA1	3	0.0638297872340425
GO:0061383	BP	GO:0061383	trabecula morphogenesis	3/174	47/18903	0.00923843309879221	0.0377518918925047	0.0238095874524364	FKBP1A/TGFB2/RHOA	3	0.0638297872340425
GO:0006555	BP	GO:0006555	methionine metabolic process	2/174	16/18903	0.00928784614958759	0.0377518918925047	0.0238095874524364	MTHFD1/MTAP	2	0.125
GO:0006735	BP	GO:0006735	NADH regeneration	2/174	16/18903	0.00928784614958759	0.0377518918925047	0.0238095874524364	HK1/TPI1	2	0.125
GO:0009130	BP	GO:0009130	pyrimidine nucleoside monophosphate biosynthetic process	2/174	16/18903	0.00928784614958759	0.0377518918925047	0.0238095874524364	UMPS/DHODH	2	0.125
GO:0009263	BP	GO:0009263	deoxyribonucleotide biosynthetic process	2/174	16/18903	0.00928784614958759	0.0377518918925047	0.0238095874524364	ADK/DTYMK	2	0.125
GO:0009265	BP	GO:0009265	2'-deoxyribonucleotide biosynthetic process	2/174	16/18903	0.00928784614958759	0.0377518918925047	0.0238095874524364	ADK/DTYMK	2	0.125
GO:0044406	BP	GO:0044406	adhesion of symbiont to host	2/174	16/18903	0.00928784614958759	0.0377518918925047	0.0238095874524364	DPP4/CD209	2	0.125
GO:0046184	BP	GO:0046184	aldehyde biosynthetic process	2/174	16/18903	0.00928784614958759	0.0377518918925047	0.0238095874524364	PNPO/TPI1	2	0.125
GO:0046321	BP	GO:0046321	positive regulation of fatty acid oxidation	2/174	16/18903	0.00928784614958759	0.0377518918925047	0.0238095874524364	PPARA/PPARD	2	0.125
GO:0046385	BP	GO:0046385	deoxyribose phosphate biosynthetic process	2/174	16/18903	0.00928784614958759	0.0377518918925047	0.0238095874524364	ADK/DTYMK	2	0.125
GO:0061621	BP	GO:0061621	canonical glycolysis	2/174	16/18903	0.00928784614958759	0.0377518918925047	0.0238095874524364	HK1/TPI1	2	0.125
GO:0061684	BP	GO:0061684	chaperone-mediated autophagy	2/174	16/18903	0.00928784614958759	0.0377518918925047	0.0238095874524364	HSPA8/HSP90AA1	2	0.125
GO:0061718	BP	GO:0061718	glucose catabolic process to pyruvate	2/174	16/18903	0.00928784614958759	0.0377518918925047	0.0238095874524364	HK1/TPI1	2	0.125
GO:0070875	BP	GO:0070875	positive regulation of glycogen metabolic process	2/174	16/18903	0.00928784614958759	0.0377518918925047	0.0238095874524364	AKT1/INSR	2	0.125
GO:0050852	BP	GO:0050852	T cell receptor signaling pathway	5/174	139/18903	0.0093228479800829	0.037853371992328	0.0238735895246585	PDE4B/CSK/ABL1/LGALS3/MAPK1	5	0.0359712230215827
GO:0030198	BP	GO:0030198	extracellular matrix organization	8/174	318/18903	0.00939305578575194	0.0380974262622111	0.0240275111214481	DPP4/HPN/MMP7/ABL1/MMP8/TGFB2/CTSG/MMP12	8	0.0251572327044025
GO:0043062	BP	GO:0043062	extracellular structure organization	8/174	319/18903	0.00956123945656481	0.0387379110957706	0.0244314559012228	DPP4/HPN/MMP7/ABL1/MMP8/TGFB2/CTSG/MMP12	8	0.0250783699059561
GO:0007266	BP	GO:0007266	Rho protein signal transduction	5/174	140/18903	0.00959797484181296	0.0388450226430456	0.0244990096481786	CDC42/ABL1/RHOA/ARHGAP1/RTN4R	5	0.0357142857142857
GO:0090257	BP	GO:0090257	regulation of muscle system process	7/174	256/18903	0.00966478509651193	0.0390734934448478	0.0246431029707418	PDE4B/PARP1/PRKACA/PPARA/RHOA/GSTO1/HSP90AA1	7	0.0273438
GO:0009066	BP	GO:0009066	aspartate family amino acid metabolic process	3/174	48/18903	0.00978872552314377	0.0394477272150623	0.0248791269481612	MTHFD1/SDS/MTAP	3	0.0625
GO:0009299	BP	GO:0009299	mRNA transcription	3/174	48/18903	0.00978872552314377	0.0394477272150623	0.0248791269481612	THRB/RXRA/NR1H3	3	0.0625
GO:0048538	BP	GO:0048538	thymus development	3/174	48/18903	0.00978872552314377	0.0394477272150623	0.0248791269481612	MAP2K1/ABL1/MAPK1	3	0.0625
GO:0032434	BP	GO:0032434	regulation of proteasomal ubiquitin-dependent protein catabolic process	5/174	141/18903	0.00987864269303659	0.0397252028125096	0.0250541269063659	AKT1/MDM2/FHIT/GSK3B/CDK2	5	0.0354609929078014
GO:0045667	BP	GO:0045667	regulation of osteoblast differentiation	5/174	141/18903	0.00987864269303659	0.0397252028125096	0.0250541269063659	CLIC1/PRKACA/CDK6/FGFR2/PTK2	5	0.0354609929078014
GO:0045229	BP	GO:0045229	external encapsulating structure organization	8/174	321/18903	0.00990433645183539	0.0397861097937413	0.0250925400831209	DPP4/HPN/MMP7/ABL1/MMP8/TGFB2/CTSG/MMP12	8	0.0249221183800623
GO:0048525	BP	GO:0048525	negative regulation of viral process	4/174	91/18903	0.00996370066537218	0.0398971113691973	0.0251625472161595	PPIA/ISG20/STAT1/APCS	4	0.043956043956044
GO:0106027	BP	GO:0106027	neuron projection organization	4/174	91/18903	0.00996370066537218	0.0398971113691973	0.0251625472161595	CDC42/INSR/IGF1R/GSK3B	4	0.043956043956044
GO:2000117	BP	GO:2000117	negative regulation of cysteine-type endopeptidase activity	4/174	91/18903	0.00996370066537218	0.0398971113691973	0.0251625472161595	AKT1/XIAP/CSNK2A1/SRC	4	0.043956043956044
GO:0051384	BP	GO:0051384	response to glucocorticoid	5/174	142/18903	0.0101649032769976	0.0406165414839354	0.0256162816748602	EIF4E/IGF1R/ALAD/CASP3/RHOA	5	0.0352112676056338
GO:1903900	BP	GO:1903900	regulation of viral life cycle	5/174	142/18903	0.0101649032769976	0.0406165414839354	0.0256162816748602	PPIA/ISG20/PPARA/CD209/APCS	5	0.0352112676056338
GO:0008654	BP	GO:0008654	phospholipid biosynthetic process	7/174	259/18903	0.0102607776876725	0.0409562470242337	0.0258305291831133	FABP5/FDPS/IMPA1/NR1H4/HEXB/PPARD/FABP3	7	0.027027027027027
GO:0009791	BP	GO:0009791	post-embryonic development	4/174	92/18903	0.0103434734447058	0.0409917070132598	0.0258528932996504	ABL1/ACADM/FGFR2/KDR	4	0.0434782608695652
GO:0035987	BP	GO:0035987	endodermal cell differentiation	3/174	49/18903	0.0103577359984139	0.0409917070132598	0.0258528932996504	MAP2K1/GRB2/MMP8	3	0.0612244897959184
GO:0045933	BP	GO:0045933	positive regulation of muscle contraction	3/174	49/18903	0.0103577359984139	0.0409917070132598	0.0258528932996504	RHOA/GSTO1/HSP90AA1	3	0.0612244897959184
GO:0006577	BP	GO:0006577	amino-acid betaine metabolic process	2/174	17/18903	0.010463019098783	0.0409917070132598	0.0258528932996504	CRAT/ACADM	2	0.117647058823529
GO:0009151	BP	GO:0009151	purine deoxyribonucleotide metabolic process	2/174	17/18903	0.010463019098783	0.0409917070132598	0.0258528932996504	ADK/PNP	2	0.117647058823529
GO:0010763	BP	GO:0010763	positive regulation of fibroblast migration	2/174	17/18903	0.010463019098783	0.0409917070132598	0.0258528932996504	AKT1/PTK2	2	0.117647058823529
GO:0016114	BP	GO:0016114	terpenoid biosynthetic process	2/174	17/18903	0.010463019098783	0.0409917070132598	0.0258528932996504	FDPS/AKR1C3	2	0.117647058823529
GO:0019377	BP	GO:0019377	glycolipid catabolic process	2/174	17/18903	0.010463019098783	0.0409917070132598	0.0258528932996504	HEXB/GM2A	2	0.117647058823529
GO:0033623	BP	GO:0033623	regulation of integrin activation	2/174	17/18903	0.010463019098783	0.0409917070132598	0.0258528932996504	SRC/SELP	2	0.117647058823529
GO:0043923	BP	GO:0043923	positive regulation by host of viral transcription	2/174	17/18903	0.010463019098783	0.0409917070132598	0.0258528932996504	HPN/CCNT1	2	0.117647058823529
GO:0044539	BP	GO:0044539	long-chain fatty acid import into cell	2/174	17/18903	0.010463019098783	0.0409917070132598	0.0258528932996504	AKT1/FABP3	2	0.117647058823529
GO:0045198	BP	GO:0045198	establishment of epithelial cell apical/basal polarity	2/174	17/18903	0.010463019098783	0.0409917070132598	0.0258528932996504	CDC42/RHOA	2	0.117647058823529
GO:0071732	BP	GO:0071732	cellular response to nitric oxide	2/174	17/18903	0.010463019098783	0.0409917070132598	0.0258528932996504	CCNA2/CDK2	2	0.117647058823529
GO:0072378	BP	GO:0072378	blood coagulation, fibrin clot formation	2/174	17/18903	0.010463019098783	0.0409917070132598	0.0258528932996504	GP1BA/FGG	2	0.117647058823529
GO:0110096	BP	GO:0110096	cellular response to aldehyde	2/174	17/18903	0.010463019098783	0.0409917070132598	0.0258528932996504	ADH5/IGF1R	2	0.117647058823529
GO:1902036	BP	GO:1902036	regulation of hematopoietic stem cell differentiation	2/174	17/18903	0.010463019098783	0.0409917070132598	0.0258528932996504	ABL1/CDK6	2	0.117647058823529
GO:1903358	BP	GO:1903358	regulation of Golgi organization	2/174	17/18903	0.010463019098783	0.0409917070132598	0.0258528932996504	MAP2K1/MAPK1	2	0.117647058823529
GO:0060828	BP	GO:0060828	regulation of canonical Wnt signaling pathway	7/174	260/18903	0.0104652740863651	0.0409917070132598	0.0258528932996504	XIAP/GSK3B/FGFR2/CSNK1G2/SRC/EGFR/MAPK14	7	0.0269230769230769
GO:0030195	BP	GO:0030195	negative regulation of blood coagulation	3/174	50/18903	0.0109455793284191	0.0426956827578044	0.0269275668450739	GP1BA/FGG/PLAU	3	0.06
GO:0050885	BP	GO:0050885	neuromuscular process controlling balance	3/174	50/18903	0.0109455793284191	0.0426956827578044	0.0269275668450739	ABL1/HEXB/GM2A	3	0.06
GO:0060043	BP	GO:0060043	regulation of cardiac muscle cell proliferation	3/174	50/18903	0.0109455793284191	0.0426956827578044	0.0269275668450739	ERBB4/FGFR2/MAPK14	3	0.06
GO:1902041	BP	GO:1902041	regulation of extrinsic apoptotic signaling pathway via death domain receptors	3/174	50/18903	0.0109455793284191	0.0426956827578044	0.0269275668450739	LGALS3/GSK3B/FGG	3	0.06
GO:0006637	BP	GO:0006637	acyl-CoA metabolic process	4/174	94/18903	0.0111308604952398	0.0432395528198194	0.0272705780467689	ACAT1/PDK1/PDK2/GCDH	4	0.0425531914893617
GO:0035304	BP	GO:0035304	regulation of protein dephosphorylation	4/174	94/18903	0.0111308604952398	0.0432395528198194	0.0272705780467689	LGALS3/FKBP1A/PPIA/GSK3B	4	0.0425531914893617
GO:0035383	BP	GO:0035383	thioester metabolic process	4/174	94/18903	0.0111308604952398	0.0432395528198194	0.0272705780467689	ACAT1/PDK1/PDK2/GCDH	4	0.0425531914893617
GO:0060761	BP	GO:0060761	negative regulation of response to cytokine stimulus	4/174	94/18903	0.0111308604952398	0.0432395528198194	0.0272705780467689	XIAP/NR1H4/NR1H3/MMP12	4	0.0425531914893617
GO:0072073	BP	GO:0072073	kidney epithelium development	5/174	146/18903	0.0113668914950567	0.0440946841217451	0.0278098973363688	ARG2/ACAT1/RARB/STAT1/FGFR2	5	0.0342465753424658
GO:1903828	BP	GO:1903828	negative regulation of protein localization	6/174	203/18903	0.0113743710632179	0.0440946841217451	0.0278098973363688	HMGCR/CSK/CTNNA1/GSK3B/NR1H3/HADH	6	0.0295566502463054
GO:0014909	BP	GO:0014909	smooth muscle cell migration	4/174	95/18903	0.0115386348333115	0.0441775915800293	0.02786218590469	PPARD/RHOA/SRC/PLAU	4	0.0421052631578947
GO:0032465	BP	GO:0032465	regulation of cytokinesis	4/174	95/18903	0.0115386348333115	0.0441775915800293	0.02786218590469	RAB11A/CDC42/IGF1R/RHOA	4	0.0421052631578947
GO:1900407	BP	GO:1900407	regulation of cellular response to oxidative stress	4/174	95/18903	0.0115386348333115	0.0441775915800293	0.02786218590469	AKT1/ABL1/PPIA/PARP1	4	0.0421052631578947
GO:0007157	BP	GO:0007157	heterophilic cell-cell adhesion via plasma membrane cell adhesion molecules	3/174	51/18903	0.0115523621288552	0.0441775915800293	0.02786218590469	SELE/SELP/CD209	3	0.0588235294117647
GO:0022602	BP	GO:0022602	ovulation cycle process	3/174	51/18903	0.0115523621288552	0.0441775915800293	0.02786218590469	CASP3/TGFB2/SRC	3	0.0588235294117647
GO:0034332	BP	GO:0034332	adherens junction organization	3/174	51/18903	0.0115523621288552	0.0441775915800293	0.02786218590469	CDC42/CSK/SRC	3	0.0588235294117647
GO:0050982	BP	GO:0050982	detection of mechanical stimulus	3/174	51/18903	0.0115523621288552	0.0441775915800293	0.02786218590469	HPN/PTK2/BACE1	3	0.0588235294117647
GO:0060688	BP	GO:0060688	regulation of morphogenesis of a branching structure	3/174	51/18903	0.0115523621288552	0.0441775915800293	0.02786218590469	ABL1/FGFR2/AR	3	0.0588235294117647
GO:1900047	BP	GO:1900047	negative regulation of hemostasis	3/174	51/18903	0.0115523621288552	0.0441775915800293	0.02786218590469	GP1BA/FGG/PLAU	3	0.0588235294117647
GO:1901888	BP	GO:1901888	regulation of cell junction assembly	6/174	204/18903	0.0116322488933985	0.0441775915800293	0.02786218590469	ABL1/PRKACA/PTK2/RHOA/SRC/KDR	6	0.0294117647058824
GO:0008584	BP	GO:0008584	male gonad development	5/174	147/18903	0.0116818754540038	0.0441775915800293	0.02786218590469	INSR/CTNNA1/AKR1C3/TGFB2/AR	5	0.0340136054421769
GO:0035296	BP	GO:0035296	regulation of tube diameter	5/174	147/18903	0.0116818754540038	0.0441775915800293	0.02786218590469	CBS/ABL1/PPARD/RHOA/FGG	5	0.0340136054421769
GO:0097746	BP	GO:0097746	blood vessel diameter maintenance	5/174	147/18903	0.0116818754540038	0.0441775915800293	0.02786218590469	CBS/ABL1/PPARD/RHOA/FGG	5	0.0340136054421769
GO:0106106	BP	GO:0106106	cold-induced thermogenesis	5/174	147/18903	0.0116818754540038	0.0441775915800293	0.02786218590469	FABP5/IGF1R/RHEB/NR1H3/HADH	5	0.0340136054421769
GO:0120161	BP	GO:0120161	regulation of cold-induced thermogenesis	5/174	147/18903	0.0116818754540038	0.0441775915800293	0.02786218590469	FABP5/IGF1R/RHEB/NR1H3/HADH	5	0.0340136054421769
GO:0006595	BP	GO:0006595	polyamine metabolic process	2/174	18/18903	0.0117002688198434	0.0441775915800293	0.02786218590469	AMD1/SRM	2	0.111111111111111
GO:0010755	BP	GO:0010755	regulation of plasminogen activation	2/174	18/18903	0.0117002688198434	0.0441775915800293	0.02786218590469	HPN/PLAU	2	0.111111111111111
GO:0043173	BP	GO:0043173	nucleotide salvage	2/174	18/18903	0.0117002688198434	0.0441775915800293	0.02786218590469	APRT/ADK	2	0.111111111111111
GO:0045722	BP	GO:0045722	positive regulation of gluconeogenesis	2/174	18/18903	0.0117002688198434	0.0441775915800293	0.02786218590469	KAT2B/PPARA	2	0.111111111111111
GO:0046827	BP	GO:0046827	positive regulation of protein export from nucleus	2/174	18/18903	0.0117002688198434	0.0441775915800293	0.02786218590469	GSK3B/PRKACA	2	0.111111111111111
GO:0051770	BP	GO:0051770	positive regulation of nitric-oxide synthase biosynthetic process	2/174	18/18903	0.0117002688198434	0.0441775915800293	0.02786218590469	STAT1/KDR	2	0.111111111111111
GO:0051988	BP	GO:0051988	regulation of attachment of spindle microtubules to kinetochore	2/174	18/18903	0.0117002688198434	0.0441775915800293	0.02786218590469	CDC42/KAT2B	2	0.111111111111111
GO:0060644	BP	GO:0060644	mammary gland epithelial cell differentiation	2/174	18/18903	0.0117002688198434	0.0441775915800293	0.02786218590469	AKT1/ERBB4	2	0.111111111111111
GO:0061620	BP	GO:0061620	glycolytic process through glucose-6-phosphate	2/174	18/18903	0.0117002688198434	0.0441775915800293	0.02786218590469	HK1/TPI1	2	0.111111111111111
GO:0071071	BP	GO:0071071	regulation of phospholipid biosynthetic process	2/174	18/18903	0.0117002688198434	0.0441775915800293	0.02786218590469	NR1H4/FABP3	2	0.111111111111111
GO:2000811	BP	GO:2000811	negative regulation of anoikis	2/174	18/18903	0.0117002688198434	0.0441775915800293	0.02786218590469	PTK2/SRC	2	0.111111111111111
GO:0050730	BP	GO:0050730	regulation of peptidyl-tyrosine phosphorylation	7/174	266/18903	0.0117551411083985	0.0443403922608791	0.0279648620052427	MIF/TNK2/ABL1/PTPN1/ERBB4/SRC/EGFR	7	0.0263157894736842
GO:0043281	BP	GO:0043281	regulation of cysteine-type endopeptidase activity involved in apoptotic process	6/174	205/18903	0.0118942309655056	0.0448202189829042	0.0282674819728089	AKT1/XIAP/CSNK2A1/RHOA/SRC/CTSD	6	0.0292682926829268
GO:0001738	BP	GO:0001738	morphogenesis of a polarized epithelium	4/174	96/18903	0.0119559002203422	0.044909829084886	0.0283239978042759	CDC42/ABL1/ERBB4/RHOA	4	0.0416666666666667
GO:0032091	BP	GO:0032091	negative regulation of protein binding	4/174	96/18903	0.0119559002203422	0.044909829084886	0.0283239978042759	AKT1/MAPK8/GSK3B/PPARA	4	0.0416666666666667
GO:0061097	BP	GO:0061097	regulation of protein tyrosine kinase activity	4/174	96/18903	0.0119559002203422	0.044909829084886	0.0283239978042759	PTPN1/ERBB4/SRC/EGFR	4	0.0416666666666667
GO:0051251	BP	GO:0051251	positive regulation of lymphocyte activation	9/174	400/18903	0.0119656357980674	0.044909829084886	0.0283239978042759	DPP4/AKT1/MIF/CSK/ABL1/PNP/RHOA/SRC/CD209	9	0.0225
GO:0035150	BP	GO:0035150	regulation of tube size	5/174	148/18903	0.0120027526171186	0.0449596652152646	0.0283554287510459	CBS/ABL1/PPARD/RHOA/FGG	5	0.0337837837837838
GO:0046546	BP	GO:0046546	development of primary male sexual characteristics	5/174	148/18903	0.0120027526171186	0.0449596652152646	0.0283554287510459	INSR/CTNNA1/AKR1C3/TGFB2/AR	5	0.0337837837837838
GO:0006220	BP	GO:0006220	pyrimidine nucleotide metabolic process	3/174	52/18903	0.0121781830066728	0.045436306924995	0.0286560399761368	UMPS/DTYMK/DHODH	3	0.0576923076923077
GO:0048013	BP	GO:0048013	ephrin receptor signaling pathway	3/174	52/18903	0.0121781830066728	0.045436306924995	0.0286560399761368	PTK2/SRC/EPHB4	3	0.0576923076923077
GO:0051496	BP	GO:0051496	positive regulation of stress fiber assembly	3/174	52/18903	0.0121781830066728	0.045436306924995	0.0286560399761368	CDC42/ABL1/RHOA	3	0.0576923076923077
GO:0060612	BP	GO:0060612	adipose tissue development	3/174	52/18903	0.0121781830066728	0.045436306924995	0.0286560399761368	ACAT1/NR1H4/PPARD	3	0.0576923076923077
GO:0051924	BP	GO:0051924	regulation of calcium ion transport	7/174	268/18903	0.0122096158898508	0.0455085683167166	0.028701614219953	PDE4B/ABL1/LGALS3/FKBP1A/PRKACA/RHOA/GSTO1	7	0.0261194029850746
GO:0006942	BP	GO:0006942	regulation of striated muscle contraction	4/174	97/18903	0.0123827323720271	0.0461082591384861	0.0290798307900258	PDE4B/PRKACA/GSTO1/HSP90AA1	4	0.0412371134020619
GO:0071214	BP	GO:0071214	cellular response to abiotic stimulus	8/174	335/18903	0.0125683738349306	0.0467072966555254	0.0294576353299904	MME/IGF1R/PARP1/MDM2/MAPK8/GRB2/CASP3/MAPK14	8	0.0238805970149254
GO:0104004	BP	GO:0104004	cellular response to environmental stimulus	8/174	335/18903	0.0125683738349306	0.0467072966555254	0.0294576353299904	MME/IGF1R/PARP1/MDM2/MAPK8/GRB2/CASP3/MAPK14	8	0.0238805970149254
GO:0006778	BP	GO:0006778	porphyrin-containing compound metabolic process	3/174	53/18903	0.0128231327365301	0.0474669839864488	0.0299367594489519	BLVRB/FECH/ALAD	3	0.0566037735849057
GO:0009409	BP	GO:0009409	response to cold	3/174	53/18903	0.0128231327365301	0.0474669839864488	0.0299367594489519	ACADM/PRKACA/HSP90AA1	3	0.0566037735849057
GO:0060071	BP	GO:0060071	Wnt signaling pathway, planar cell polarity pathway	3/174	53/18903	0.0128231327365301	0.0474669839864488	0.0299367594489519	CDC42/ABL1/RHOA	3	0.0566037735849057
GO:0071622	BP	GO:0071622	regulation of granulocyte chemotaxis	3/174	53/18903	0.0128231327365301	0.0474669839864488	0.0299367594489519	DPP4/MAPK1/PTK2	3	0.0566037735849057
GO:0010759	BP	GO:0010759	positive regulation of macrophage chemotaxis	2/174	19/18903	0.0129983665087769	0.0475199777739506	0.0299701818856752	MAPK1/PTK2	2	0.105263157894737
GO:0055070	BP	GO:0055070	copper ion homeostasis	2/174	19/18903	0.0129983665087769	0.0475199777739506	0.0299701818856752	XIAP/ATOX1	2	0.105263157894737
GO:0060438	BP	GO:0060438	trachea development	2/174	19/18903	0.0129983665087769	0.0475199777739506	0.0299701818856752	MAP2K1/MAPK1	2	0.105263157894737
GO:0061615	BP	GO:0061615	glycolytic process through fructose-6-phosphate	2/174	19/18903	0.0129983665087769	0.0475199777739506	0.0299701818856752	HK1/TPI1	2	0.105263157894737
GO:0071800	BP	GO:0071800	podosome assembly	2/174	19/18903	0.0129983665087769	0.0475199777739506	0.0299701818856752	RHOA/SRC	2	0.105263157894737
GO:0097284	BP	GO:0097284	hepatocyte apoptotic process	2/174	19/18903	0.0129983665087769	0.0475199777739506	0.0299701818856752	IGF1R/PPARA	2	0.105263157894737
GO:0097494	BP	GO:0097494	regulation of vesicle size	2/174	19/18903	0.0129983665087769	0.0475199777739506	0.0299701818856752	RAB11A/RAB5A	2	0.105263157894737
GO:0140354	BP	GO:0140354	lipid import into cell	2/174	19/18903	0.0129983665087769	0.0475199777739506	0.0299701818856752	AKT1/FABP3	2	0.105263157894737
GO:1902170	BP	GO:1902170	cellular response to reactive nitrogen species	2/174	19/18903	0.0129983665087769	0.0475199777739506	0.0299701818856752	CCNA2/CDK2	2	0.105263157894737
GO:1902176	BP	GO:1902176	negative regulation of oxidative stress-induced intrinsic apoptotic signaling pathway	2/174	19/18903	0.0129983665087769	0.0475199777739506	0.0299701818856752	AKT1/PPIA	2	0.105263157894737
GO:1902894	BP	GO:1902894	negative regulation of miRNA transcription	2/174	19/18903	0.0129983665087769	0.0475199777739506	0.0299701818856752	PPARA/PPARD	2	0.105263157894737
GO:2000251	BP	GO:2000251	positive regulation of actin cytoskeleton reorganization	2/174	19/18903	0.0129983665087769	0.0475199777739506	0.0299701818856752	CDC42/ABL1	2	0.105263157894737
GO:0046718	BP	GO:0046718	viral entry into host cell	5/174	151/18903	0.013001224035715	0.0475199777739506	0.0299701818856752	DPP4/INSR/CD209/EGFR/APCS	5	0.033112582781457
GO:0031396	BP	GO:0031396	regulation of protein ubiquitination	6/174	210/18903	0.0132668384812553	0.0484438671358133	0.0305528659169889	AKT1/XIAP/ABL1/FKBP1A/PPIA/HSP90AA1	6	0.0285714285714286
GO:0010883	BP	GO:0010883	regulation of lipid storage	3/174	54/18903	0.0134872944343635	0.0491062496200957	0.0309706212372094	PPARA/NR1H3/PPARD	3	0.0555555555555556
GO:0030520	BP	GO:0030520	intracellular estrogen receptor signaling pathway	3/174	54/18903	0.0134872944343635	0.0491062496200957	0.0309706212372094	PARP1/SRC/AR	3	0.0555555555555556
GO:1902743	BP	GO:1902743	regulation of lamellipodium organization	3/174	54/18903	0.0134872944343635	0.0491062496200957	0.0309706212372094	CDC42/SRC/HSP90AA1	3	0.0555555555555556
GO:0010769	BP	GO:0010769	regulation of cell morphogenesis involved in differentiation	4/174	100/18903	0.0137213604416149	0.0497185125703856	0.0313567668719851	CDC42/ABL1/PTK2/FGG	4	0.04
GO:0019080	BP	GO:0019080	viral gene expression	4/174	100/18903	0.0137213604416149	0.0497185125703856	0.0313567668719851	HPN/GSK3B/MAN1B1/CCNT1	4	0.04
GO:0042632	BP	GO:0042632	cholesterol homeostasis	4/174	100/18903	0.0137213604416149	0.0497185125703856	0.0313567668719851	EPHX2/NR1H4/NR1H3/FABP3	4	0.04
GO:0097306	BP	GO:0097306	cellular response to alcohol	4/174	100/18903	0.0137213604416149	0.0497185125703856	0.0313567668719851	AKT1/IGF1R/CTNNA1/AKR1C3	4	0.04
GO:1901992	BP	GO:1901992	positive regulation of mitotic cell cycle phase transition	4/174	100/18903	0.0137213604416149	0.0497185125703856	0.0313567668719851	AKT1/RAB11A/MDM2/EGFR	4	0.04
GO:0042098	BP	GO:0042098	T cell proliferation	6/174	212/18903	0.0138457365522497	0.0501184411010214	0.0316089961735526	ARG2/ABL1/LGALS3/PNP/CASP3/CD209	6	0.0283018867924528
GO:0002768	BP	GO:0002768	immune response-regulating cell surface receptor signaling pathway	8/174	341/18903	0.013858307017064	0.0501184411010214	0.0316089961735526	PDE4B/CSK/ABL1/LGALS3/MAPK8/MAPK1/PTK2/SRC	8	0.0234604105571848
GO:0008360	BP	GO:0008360	regulation of cell shape	5/174	154/18903	0.0140544425412893	0.0507509007234002	0.0320078795654642	HPN/HEXB/PTK2/RHOA/KDR	5	0.0324675324675325
GO:0002686	BP	GO:0002686	negative regulation of leukocyte migration	3/174	55/18903	0.0141707437281183	0.0507509007234002	0.0320078795654642	DPP4/AKT1/MIF	3	0.0545454545454545
GO:0003229	BP	GO:0003229	ventricular cardiac muscle tissue development	3/174	55/18903	0.0141707437281183	0.0507509007234002	0.0320078795654642	FKBP1A/FGFR2/TGFB2	3	0.0545454545454545
GO:0010518	BP	GO:0010518	positive regulation of phospholipase activity	3/174	55/18903	0.0141707437281183	0.0507509007234002	0.0320078795654642	FGFR2/SELE/EGFR	3	0.0545454545454545
GO:1900087	BP	GO:1900087	positive regulation of G1/S transition of mitotic cell cycle	3/174	55/18903	0.0141707437281183	0.0507509007234002	0.0320078795654642	AKT1/MDM2/EGFR	3	0.0545454545454545
GO:0022411	BP	GO:0022411	cellular component disassembly	10/174	483/18903	0.0141743119060364	0.0507509007234002	0.0320078795654642	DPP4/INSR/HPN/MMP7/IGF1R/GSK3B/HSPA8/MMP8/CTSG/MMP12	10	0.020703933747412
GO:0055092	BP	GO:0055092	sterol homeostasis	4/174	101/18903	0.0141871819314266	0.0507509007234002	0.0320078795654642	EPHX2/NR1H4/NR1H3/FABP3	4	0.0396039603960396
GO:1905477	BP	GO:1905477	positive regulation of protein localization to membrane	4/174	101/18903	0.0141871819314266	0.0507509007234002	0.0320078795654642	AKT1/LGALS3/MAPK8/EGFR	4	0.0396039603960396
GO:0001780	BP	GO:0001780	neutrophil homeostasis	2/174	20/18903	0.0143561004962534	0.0507509007234002	0.0320078795654642	PDE4B/MTHFD1	2	0.1
GO:0006525	BP	GO:0006525	arginine metabolic process	2/174	20/18903	0.0143561004962534	0.0507509007234002	0.0320078795654642	ARG2/OAT	2	0.1
GO:0009110	BP	GO:0009110	vitamin biosynthetic process	2/174	20/18903	0.0143561004962534	0.0507509007234002	0.0320078795654642	PNPO/RFK	2	0.1
GO:0014856	BP	GO:0014856	skeletal muscle cell proliferation	2/174	20/18903	0.0143561004962534	0.0507509007234002	0.0320078795654642	PPARD/SRC	2	0.1
GO:0031998	BP	GO:0031998	regulation of fatty acid beta-oxidation	2/174	20/18903	0.0143561004962534	0.0507509007234002	0.0320078795654642	AKT1/PPARA	2	0.1
GO:0045655	BP	GO:0045655	regulation of monocyte differentiation	2/174	20/18903	0.0143561004962534	0.0507509007234002	0.0320078795654642	CDK6/APCS	2	0.1
GO:0060716	BP	GO:0060716	labyrinthine layer blood vessel development	2/174	20/18903	0.0143561004962534	0.0507509007234002	0.0320078795654642	AKT1/MAPK1	2	0.1
GO:0060749	BP	GO:0060749	mammary gland alveolus development	2/174	20/18903	0.0143561004962534	0.0507509007234002	0.0320078795654642	ERBB4/AR	2	0.1
GO:0061377	BP	GO:0061377	mammary gland lobule development	2/174	20/18903	0.0143561004962534	0.0507509007234002	0.0320078795654642	ERBB4/AR	2	0.1
GO:0071379	BP	GO:0071379	cellular response to prostaglandin stimulus	2/174	20/18903	0.0143561004962534	0.0507509007234002	0.0320078795654642	AKT1/AKR1C3	2	0.1
GO:0072234	BP	GO:0072234	metanephric nephron tubule development	2/174	20/18903	0.0143561004962534	0.0507509007234002	0.0320078795654642	ACAT1/STAT1	2	0.1
GO:0072376	BP	GO:0072376	protein activation cascade	2/174	20/18903	0.0143561004962534	0.0507509007234002	0.0320078795654642	GP1BA/FGG	2	0.1
GO:1903427	BP	GO:1903427	negative regulation of reactive oxygen species biosynthetic process	2/174	20/18903	0.0143561004962534	0.0507509007234002	0.0320078795654642	PPARA/RHOA	2	0.1
GO:1903579	BP	GO:1903579	negative regulation of ATP metabolic process	2/174	20/18903	0.0143561004962534	0.0507509007234002	0.0320078795654642	PARP1/PPARA	2	0.1
GO:2000010	BP	GO:2000010	positive regulation of protein localization to cell surface	2/174	20/18903	0.0143561004962534	0.0507509007234002	0.0320078795654642	AKT1/ERBB4	2	0.1
GO:2000629	BP	GO:2000629	negative regulation of miRNA metabolic process	2/174	20/18903	0.0143561004962534	0.0507509007234002	0.0320078795654642	PPARA/PPARD	2	0.1
GO:0010506	BP	GO:0010506	regulation of autophagy	8/174	344/18903	0.0145384005050867	0.0513472347426845	0.0323839790474039	AKT1/ABL1/MAPK8/GSK3B/PRKACA/RHEB/CASP3/KDR	8	0.0232558139534884
GO:1901019	BP	GO:1901019	regulation of calcium ion transmembrane transporter activity	4/174	102/18903	0.0146629225635649	0.0517299228534805	0.0326253350585662	PDE4B/FKBP1A/PRKACA/GSTO1	4	0.0392156862745098
GO:1903532	BP	GO:1903532	positive regulation of secretion by cell	7/174	278/18903	0.0146741827818728	0.0517299228534805	0.0326253350585662	MIF/PPIA/RAB5A/NR1H4/TGFB2/PPARD/FGG	7	0.0251798561151079
GO:0008643	BP	GO:0008643	carbohydrate transport	5/174	156/18903	0.0147876136797863	0.052081119327875	0.0328468297373995	AKT1/FABP5/INSR/PPARD/MAPK14	5	0.032051282051282
GO:0043551	BP	GO:0043551	regulation of phosphatidylinositol 3-kinase activity	3/174	56/18903	0.0148735489256771	0.0523349128243042	0.0330068937274453	CDC42/PTK2/SRC	3	0.0535714285714286
GO:0048754	BP	GO:0048754	branching morphogenesis of an epithelial tube	5/174	157/18903	0.0151636404542089	0.053256286585918	0.0335879912050496	ABL1/FGFR2/SRC/KDR/AR	5	0.0318471337579618
GO:0090316	BP	GO:0090316	positive regulation of intracellular protein transport	5/174	157/18903	0.0151636404542089	0.053256286585918	0.0335879912050496	MAPK8/GSK3B/PRKACA/HSP90AA1/MAPK14	5	0.0318471337579618
GO:0043542	BP	GO:0043542	endothelial cell migration	7/174	281/18903	0.0154782206548926	0.0543105565676788	0.0342529044602763	DPP4/AKT1/ABL1/PTK2/RHOA/EPHB4/KDR	7	0.0249110320284698
GO:0001678	BP	GO:0001678	cellular glucose homeostasis	5/174	158/18903	0.0155460193892484	0.0544977557028299	0.0343709683229323	HK1/IGF1R/NR1H4/PRKACA/PPARD	5	0.0316455696202532
GO:0070231	BP	GO:0070231	T cell apoptotic process	3/174	57/18903	0.0155957711800275	0.0545707318098923	0.0344169933276655	ARG2/AKT1/LGALS3	3	0.0526315789473684
GO:0090175	BP	GO:0090175	regulation of establishment of planar polarity	3/174	57/18903	0.0155957711800275	0.0545707318098923	0.0344169933276655	CDC42/ABL1/RHOA	3	0.0526315789473684
GO:0060291	BP	GO:0060291	long-term synaptic potentiation	4/174	104/18903	0.0156444203127679	0.0545807570826524	0.0344233161262472	MME/ABL1/MAPK1/GSK3B	4	0.0384615384615385
GO:1902882	BP	GO:1902882	regulation of response to oxidative stress	4/174	104/18903	0.0156444203127679	0.0545807570826524	0.0344233161262472	AKT1/ABL1/PPIA/PARP1	4	0.0384615384615385
GO:1901215	BP	GO:1901215	negative regulation of neuron death	6/174	218/18903	0.0156880382439308	0.0545807570826524	0.0344233161262472	AKT1/GSK3B/NMNAT1/PPARA/RHOA/KDR	6	0.0275229357798165
GO:0045165	BP	GO:0045165	cell fate commitment	7/174	282/18903	0.0157530734266419	0.0545807570826524	0.0344233161262472	CDC42/ERBB4/CASP3/FGFR2/RHOA/KDR/AR	7	0.024822695035461
GO:0006067	BP	GO:0006067	ethanol metabolic process	2/174	21/18903	0.0157722760392606	0.0545807570826524	0.0344233161262472	ADH5/ALDH2	2	0.0952380952380952
GO:0009067	BP	GO:0009067	aspartate family amino acid biosynthetic process	2/174	21/18903	0.0157722760392606	0.0545807570826524	0.0344233161262472	MTHFD1/MTAP	2	0.0952380952380952
GO:0009083	BP	GO:0009083	branched-chain amino acid catabolic process	2/174	21/18903	0.0157722760392606	0.0545807570826524	0.0344233161262472	BCAT2/ACAT1	2	0.0952380952380952
GO:0034035	BP	GO:0034035	purine ribonucleoside bisphosphate metabolic process	2/174	21/18903	0.0157722760392606	0.0545807570826524	0.0344233161262472	SULT2B1/PAPSS1	2	0.0952380952380952
GO:0042454	BP	GO:0042454	ribonucleoside catabolic process	2/174	21/18903	0.0157722760392606	0.0545807570826524	0.0344233161262472	AHCY/PNP	2	0.0952380952380952
GO:0050427	BP	GO:0050427	3'-phosphoadenosine 5'-phosphosulfate metabolic process	2/174	21/18903	0.0157722760392606	0.0545807570826524	0.0344233161262472	SULT2B1/PAPSS1	2	0.0952380952380952
GO:0071731	BP	GO:0071731	response to nitric oxide	2/174	21/18903	0.0157722760392606	0.0545807570826524	0.0344233161262472	CCNA2/CDK2	2	0.0952380952380952
GO:0097062	BP	GO:0097062	dendritic spine maintenance	2/174	21/18903	0.0157722760392606	0.0545807570826524	0.0344233161262472	INSR/IGF1R	2	0.0952380952380952
GO:0120254	BP	GO:0120254	olefinic compound metabolic process	5/174	160/18903	0.0163300043022419	0.0560736275397979	0.0353648485348952	EPHX2/CBR1/CYP2C9/AKR1C3/HSD17B1	5	0.03125
GO:1990845	BP	GO:1990845	adaptive thermogenesis	5/174	160/18903	0.0163300043022419	0.0560736275397979	0.0353648485348952	FABP5/IGF1R/RHEB/NR1H3/HADH	5	0.03125
GO:0001541	BP	GO:0001541	ovarian follicle development	3/174	58/18903	0.0163374646517068	0.0560736275397979	0.0353648485348952	CTNNA1/SRC/KDR	3	0.0517241379310345
GO:0001706	BP	GO:0001706	endoderm formation	3/174	58/18903	0.0163374646517068	0.0560736275397979	0.0353648485348952	MAP2K1/GRB2/MMP8	3	0.0517241379310345
GO:0006695	BP	GO:0006695	cholesterol biosynthetic process	3/174	58/18903	0.0163374646517068	0.0560736275397979	0.0353648485348952	HMGCR/FDPS/SEC14L2	3	0.0517241379310345
GO:0019369	BP	GO:0019369	arachidonic acid metabolic process	3/174	58/18903	0.0163374646517068	0.0560736275397979	0.0353648485348952	CBR1/CYP2C9/AKR1C3	3	0.0517241379310345
GO:0033619	BP	GO:0033619	membrane protein proteolysis	3/174	58/18903	0.0163374646517068	0.0560736275397979	0.0353648485348952	MMP7/CLPP/BACE1	3	0.0517241379310345
GO:0048008	BP	GO:0048008	platelet-derived growth factor receptor signaling pathway	3/174	58/18903	0.0163374646517068	0.0560736275397979	0.0353648485348952	ABL1/PTPN1/SRC	3	0.0517241379310345
GO:1902653	BP	GO:1902653	secondary alcohol biosynthetic process	3/174	58/18903	0.0163374646517068	0.0560736275397979	0.0353648485348952	HMGCR/FDPS/SEC14L2	3	0.0517241379310345
GO:0045861	BP	GO:0045861	negative regulation of proteolysis	8/174	352/18903	0.0164706849929081	0.0564794761756811	0.0356208115636098	AKT1/XIAP/ALAD/CSNK2A1/FHIT/NR1H3/SRC/PLAU	8	0.0227272727272727
GO:0050866	BP	GO:0050866	negative regulation of cell activation	6/174	221/18903	0.016670094933798	0.0571113515806414	0.0360193264978092	ARG2/LGALS3/CASP3/NR1H3/FGG/CTSG	6	0.0271493212669683
GO:0019221	BP	GO:0019221	cytokine-mediated signaling pathway	10/174	496/18903	0.0167552766814453	0.0573510922344933	0.0361705275576142	AKT1/XIAP/NR1H4/PTPN1/PRKACA/STAT1/NR1H3/SRC/CTSG/MMP12	10	0.0201612903225806
GO:0043666	BP	GO:0043666	regulation of phosphoprotein phosphatase activity	3/174	59/18903	0.0170986766685623	0.0579775734529294	0.0365656404542112	LGALS3/FKBP1A/GSK3B	3	0.0508474576271186
GO:0046324	BP	GO:0046324	regulation of glucose import	3/174	59/18903	0.0170986766685623	0.0579775734529294	0.0365656404542112	AKT1/INSR/MAPK14	3	0.0508474576271186
GO:1903078	BP	GO:1903078	positive regulation of protein localization to plasma membrane	3/174	59/18903	0.0170986766685623	0.0579775734529294	0.0365656404542112	AKT1/LGALS3/EGFR	3	0.0508474576271186
GO:0044089	BP	GO:0044089	positive regulation of cellular component biogenesis	10/174	498/18903	0.0171814088452915	0.0579775734529294	0.0365656404542112	CDC42/ABL1/LGALS3/GRB2/GSK3B/RHOA/SRC/KDR/CDK2/HSP90AA1	10	0.0200803212851406
GO:0032963	BP	GO:0032963	collagen metabolic process	4/174	107/18903	0.017192633300951	0.0579775734529294	0.0365656404542112	MMP7/MMP8/PPARD/MMP12	4	0.0373831775700935
GO:0006907	BP	GO:0006907	pinocytosis	2/174	22/18903	0.0172457151151079	0.0579775734529294	0.0365656404542112	CDC42/NR1H3	2	0.0909090909090909
GO:0007530	BP	GO:0007530	sex determination	2/174	22/18903	0.0172457151151079	0.0579775734529294	0.0365656404542112	INSR/AR	2	0.0909090909090909
GO:0009070	BP	GO:0009070	serine family amino acid biosynthetic process	2/174	22/18903	0.0172457151151079	0.0579775734529294	0.0365656404542112	CBS/MTHFD1	2	0.0909090909090909
GO:0009129	BP	GO:0009129	pyrimidine nucleoside monophosphate metabolic process	2/174	22/18903	0.0172457151151079	0.0579775734529294	0.0365656404542112	UMPS/DHODH	2	0.0909090909090909
GO:0009713	BP	GO:0009713	catechol-containing compound biosynthetic process	2/174	22/18903	0.0172457151151079	0.0579775734529294	0.0365656404542112	ALDH2/TGFB2	2	0.0909090909090909
GO:0010881	BP	GO:0010881	regulation of cardiac muscle contraction by regulation of the release of sequestered calcium ion	2/174	22/18903	0.0172457151151079	0.0579775734529294	0.0365656404542112	PRKACA/GSTO1	2	0.0909090909090909
GO:0010988	BP	GO:0010988	regulation of low-density lipoprotein particle clearance	2/174	22/18903	0.0172457151151079	0.0579775734529294	0.0365656404542112	CSK/NR1H4	2	0.0909090909090909
GO:0019400	BP	GO:0019400	alditol metabolic process	2/174	22/18903	0.0172457151151079	0.0579775734529294	0.0365656404542112	SORD/TPI1	2	0.0909090909090909
GO:0035089	BP	GO:0035089	establishment of apical/basal cell polarity	2/174	22/18903	0.0172457151151079	0.0579775734529294	0.0365656404542112	CDC42/RHOA	2	0.0909090909090909
GO:0042423	BP	GO:0042423	catecholamine biosynthetic process	2/174	22/18903	0.0172457151151079	0.0579775734529294	0.0365656404542112	ALDH2/TGFB2	2	0.0909090909090909
GO:0046514	BP	GO:0046514	ceramide catabolic process	2/174	22/18903	0.0172457151151079	0.0579775734529294	0.0365656404542112	HEXB/GM2A	2	0.0909090909090909
GO:0046628	BP	GO:0046628	positive regulation of insulin receptor signaling pathway	2/174	22/18903	0.0172457151151079	0.0579775734529294	0.0365656404542112	NR1H4/SRC	2	0.0909090909090909
GO:0051767	BP	GO:0051767	nitric-oxide synthase biosynthetic process	2/174	22/18903	0.0172457151151079	0.0579775734529294	0.0365656404542112	STAT1/KDR	2	0.0909090909090909
GO:0051769	BP	GO:0051769	regulation of nitric-oxide synthase biosynthetic process	2/174	22/18903	0.0172457151151079	0.0579775734529294	0.0365656404542112	STAT1/KDR	2	0.0909090909090909
GO:0060065	BP	GO:0060065	uterus development	2/174	22/18903	0.0172457151151079	0.0579775734529294	0.0365656404542112	TGFB2/SRC	2	0.0909090909090909
GO:0006457	BP	GO:0006457	protein folding	6/174	223/18903	0.0173478991806477	0.0582691680404301	0.0367495450609399	FKBP1A/PPIA/CSNK2A1/HSPA8/APCS/HSP90AA1	6	0.0269058295964126
GO:0007249	BP	GO:0007249	I-kappaB kinase/NF-kappaB signaling	7/174	288/18903	0.0174755313424068	0.0586456443270091	0.0369869833619023	AKT1/ABL1/FKBP1A/NR1H4/STAT1/RHOA/PPP5C	7	0.0243055555555556
GO:0008637	BP	GO:0008637	apoptotic mitochondrial changes	4/174	108/18903	0.0177291963425643	0.0592334177184699	0.0373576837762298	AKT1/MAPK8/GSK3B/ERBB4	4	0.037037037037037
GO:0014812	BP	GO:0014812	muscle cell migration	4/174	108/18903	0.0177291963425643	0.0592334177184699	0.0373576837762298	PPARD/RHOA/SRC/PLAU	4	0.037037037037037
GO:0033138	BP	GO:0033138	positive regulation of peptidyl-serine phosphorylation	4/174	108/18903	0.0177291963425643	0.0592334177184699	0.0373576837762298	AKT1/MIF/EGFR/HSP90AA1	4	0.037037037037037
GO:0051341	BP	GO:0051341	regulation of oxidoreductase activity	4/174	108/18903	0.0177291963425643	0.0592334177184699	0.0373576837762298	AKT1/ABL1/RFK/EGFR	4	0.037037037037037
GO:0062014	BP	GO:0062014	negative regulation of small molecule metabolic process	4/174	108/18903	0.0177291963425643	0.0592334177184699	0.0373576837762298	AKT1/PARP1/AKR1C3/PPARA	4	0.037037037037037
GO:0051353	BP	GO:0051353	positive regulation of oxidoreductase activity	3/174	60/18903	0.0178794478828665	0.0595771001891983	0.0375744394785925	AKT1/ABL1/RFK	3	0.05
GO:0055008	BP	GO:0055008	cardiac muscle tissue morphogenesis	3/174	60/18903	0.0178794478828665	0.0595771001891983	0.0375744394785925	FKBP1A/FGFR2/TGFB2	3	0.05
GO:2000300	BP	GO:2000300	regulation of synaptic vesicle exocytosis	3/174	60/18903	0.0178794478828665	0.0595771001891983	0.0375744394785925	RAB5A/GSK3B/BACE1	3	0.05
GO:0033157	BP	GO:0033157	regulation of intracellular protein transport	6/174	225/18903	0.0180444516888307	0.0600738497531063	0.0378877324446113	MAPK8/GSK3B/PTPN1/PRKACA/HSP90AA1/MAPK14	6	0.0266666666666667
GO:0090092	BP	GO:0090092	regulation of transmembrane receptor protein serine/threonine kinase signaling pathway	7/174	290/18903	0.0180781362245591	0.0601329187293096	0.0379249864174359	XIAP/ABL1/FKBP1A/PARP1/PPARA/TGFB2/KDR	7	0.0241379310344828
GO:0030038	BP	GO:0030038	contractile actin filament bundle assembly	4/174	109/18903	0.0182760979036204	0.0606309949801725	0.038239116106265	CDC42/ABL1/RHOA/SRC	4	0.036697247706422
GO:0043149	BP	GO:0043149	stress fiber assembly	4/174	109/18903	0.0182760979036204	0.0606309949801725	0.038239116106265	CDC42/ABL1/RHOA/SRC	4	0.036697247706422
GO:0046822	BP	GO:0046822	regulation of nucleocytoplasmic transport	4/174	109/18903	0.0182760979036204	0.0606309949801725	0.038239116106265	GSK3B/PRKACA/HSP90AA1/MAPK14	4	0.036697247706422
GO:0009306	BP	GO:0009306	protein secretion	8/174	359/18903	0.0183082938165841	0.0606844325801013	0.0382728184492462	HMGCR/PPIA/NR1H4/TGFB2/NR1H3/PPARD/FGG/HADH	8	0.0222841225626741
GO:0035592	BP	GO:0035592	establishment of protein localization to extracellular region	8/174	360/18903	0.0185823467272457	0.0614226075050917	0.0387383749962346	HMGCR/PPIA/NR1H4/TGFB2/NR1H3/PPARD/FGG/HADH	8	0.0222222222222222
GO:1902893	BP	GO:1902893	regulation of miRNA transcription	3/174	61/18903	0.0186798124258225	0.0614226075050917	0.0387383749962346	PPARA/TGFB2/PPARD	3	0.0491803278688525
GO:1904356	BP	GO:1904356	regulation of telomere maintenance via telomere lengthening	3/174	61/18903	0.0186798124258225	0.0614226075050917	0.0387383749962346	PARP1/MAPK1/SRC	3	0.0491803278688525
GO:0002689	BP	GO:0002689	negative regulation of leukocyte chemotaxis	2/174	23/18903	0.0187752562177547	0.0614226075050917	0.0387383749962346	DPP4/MIF	2	0.0869565217391304
GO:0003283	BP	GO:0003283	atrial septum development	2/174	23/18903	0.0187752562177547	0.0614226075050917	0.0387383749962346	MDM2/TGFB2	2	0.0869565217391304
GO:0009220	BP	GO:0009220	pyrimidine ribonucleotide biosynthetic process	2/174	23/18903	0.0187752562177547	0.0614226075050917	0.0387383749962346	UMPS/DHODH	2	0.0869565217391304
GO:0032727	BP	GO:0032727	positive regulation of interferon-alpha production	2/174	23/18903	0.0187752562177547	0.0614226075050917	0.0387383749962346	STAT1/MMP12	2	0.0869565217391304
GO:0046794	BP	GO:0046794	transport of virus	2/174	23/18903	0.0187752562177547	0.0614226075050917	0.0387383749962346	DPP4/CD209	2	0.0869565217391304
GO:0051131	BP	GO:0051131	chaperone-mediated protein complex assembly	2/174	23/18903	0.0187752562177547	0.0614226075050917	0.0387383749962346	APCS/HSP90AA1	2	0.0869565217391304
GO:0060444	BP	GO:0060444	branching involved in mammary gland duct morphogenesis	2/174	23/18903	0.0187752562177547	0.0614226075050917	0.0387383749962346	SRC/AR	2	0.0869565217391304
GO:0072170	BP	GO:0072170	metanephric tubule development	2/174	23/18903	0.0187752562177547	0.0614226075050917	0.0387383749962346	ACAT1/STAT1	2	0.0869565217391304
GO:0072243	BP	GO:0072243	metanephric nephron epithelium development	2/174	23/18903	0.0187752562177547	0.0614226075050917	0.0387383749962346	ACAT1/STAT1	2	0.0869565217391304
GO:1900543	BP	GO:1900543	negative regulation of purine nucleotide metabolic process	2/174	23/18903	0.0187752562177547	0.0614226075050917	0.0387383749962346	PARP1/PPARA	2	0.0869565217391304
GO:1902254	BP	GO:1902254	negative regulation of intrinsic apoptotic signaling pathway by p53 class mediator	2/174	23/18903	0.0187752562177547	0.0614226075050917	0.0387383749962346	MIF/MDM2	2	0.0869565217391304
GO:2001169	BP	GO:2001169	regulation of ATP biosynthetic process	2/174	23/18903	0.0187752562177547	0.0614226075050917	0.0387383749962346	PARP1/PPARA	2	0.0869565217391304
GO:0050808	BP	GO:0050808	synapse organization	9/174	432/18903	0.018823919396705	0.0614703445234928	0.0387684820625924	CDC42/INSR/IGF1R/ABL1/ERBB4/HSPA8/RHOA/FNTA/MAPK14	9	0.0208333333333333
GO:2000060	BP	GO:2000060	positive regulation of ubiquitin-dependent protein catabolic process	4/174	110/18903	0.0188333908370179	0.0614703445234928	0.0387684820625924	AKT1/MDM2/GSK3B/PTK2	4	0.0363636363636364
GO:0099173	BP	GO:0099173	postsynapse organization	5/174	166/18903	0.0188387376111235	0.0614703445234928	0.0387684820625924	CDC42/INSR/IGF1R/HSPA8/FNTA	5	0.0301204819277108
GO:0001959	BP	GO:0001959	regulation of cytokine-mediated signaling pathway	5/174	167/18903	0.0192801393122128	0.0627477873042853	0.0395741472645211	XIAP/NR1H4/PTPN1/NR1H3/MMP12	5	0.029940119760479
GO:0003205	BP	GO:0003205	cardiac chamber development	5/174	167/18903	0.0192801393122128	0.0627477873042853	0.0395741472645211	IGF1R/FKBP1A/MDM2/FGFR2/TGFB2	5	0.029940119760479
GO:0070665	BP	GO:0070665	positive regulation of leukocyte proliferation	5/174	167/18903	0.0192801393122128	0.0627477873042853	0.0395741472645211	MIF/MAPK1/PNP/PTK2/CD209	5	0.029940119760479
GO:0048588	BP	GO:0048588	developmental cell growth	6/174	229/18903	0.0194946988737723	0.0631358268501522	0.0398188783505453	ABL1/PAK6/GSK3B/PPARA/HSP90AA1/RTN4R	6	0.0262008733624454
GO:0006767	BP	GO:0006767	water-soluble vitamin metabolic process	3/174	62/18903	0.0194997980594982	0.0631358268501522	0.0398188783505453	PNPO/RFK/GSTO1	3	0.0483870967741935
GO:0032233	BP	GO:0032233	positive regulation of actin filament bundle assembly	3/174	62/18903	0.0194997980594982	0.0631358268501522	0.0398188783505453	CDC42/ABL1/RHOA	3	0.0483870967741935
GO:0043030	BP	GO:0043030	regulation of macrophage activation	3/174	62/18903	0.0194997980594982	0.0631358268501522	0.0398188783505453	MIF/MMP8/NR1H3	3	0.0483870967741935
GO:0061614	BP	GO:0061614	miRNA transcription	3/174	62/18903	0.0194997980594982	0.0631358268501522	0.0398188783505453	PPARA/TGFB2/PPARD	3	0.0483870967741935
GO:0070228	BP	GO:0070228	regulation of lymphocyte apoptotic process	3/174	62/18903	0.0194997980594982	0.0631358268501522	0.0398188783505453	ARG2/MIF/LGALS3	3	0.0483870967741935
GO:0050920	BP	GO:0050920	regulation of chemotaxis	6/174	230/18903	0.0198693253395816	0.0642770970676687	0.040538661431303	DPP4/MIF/MAPK1/PTK2/PGF/KDR	6	0.0260869565217391
GO:0001837	BP	GO:0001837	epithelial to mesenchymal transition	5/174	169/18903	0.0201832376418983	0.0650769656715735	0.0410431273142145	HPN/GSK3B/FGFR2/TGFB2/PTK2	5	0.029585798816568
GO:0007568	BP	GO:0007568	aging	5/174	169/18903	0.0201832376418983	0.0650769656715735	0.0410431273142145	NQO1/MME/IGF1R/CTNNA1/GRB2	5	0.029585798816568
GO:0032481	BP	GO:0032481	positive regulation of type I interferon production	3/174	63/18903	0.0203394263262259	0.0650769656715735	0.0410431273142145	STAT1/HSP90AA1/MMP12	3	0.0476190476190476
GO:0050994	BP	GO:0050994	regulation of lipid catabolic process	3/174	63/18903	0.0203394263262259	0.0650769656715735	0.0410431273142145	AKT1/PPARA/PDE3B	3	0.0476190476190476
GO:0003181	BP	GO:0003181	atrioventricular valve morphogenesis	2/174	24/18903	0.0203597541564375	0.0650769656715735	0.0410431273142145	MDM2/TGFB2	2	0.0833333333333333
GO:0030859	BP	GO:0030859	polarized epithelial cell differentiation	2/174	24/18903	0.0203597541564375	0.0650769656715735	0.0410431273142145	CDC42/RHOA	2	0.0833333333333333
GO:0035357	BP	GO:0035357	peroxisome proliferator activated receptor signaling pathway	2/174	24/18903	0.0203597541564375	0.0650769656715735	0.0410431273142145	FABP5/RXRA	2	0.0833333333333333
GO:0036120	BP	GO:0036120	cellular response to platelet-derived growth factor stimulus	2/174	24/18903	0.0203597541564375	0.0650769656715735	0.0410431273142145	CCNA2/SRC	2	0.0833333333333333
GO:0042430	BP	GO:0042430	indole-containing compound metabolic process	2/174	24/18903	0.0203597541564375	0.0650769656715735	0.0410431273142145	ALDH2/GCDH	2	0.0833333333333333
GO:0042745	BP	GO:0042745	circadian sleep/wake cycle	2/174	24/18903	0.0203597541564375	0.0650769656715735	0.0410431273142145	AHCY/PARP1	2	0.0833333333333333
GO:0048011	BP	GO:0048011	neurotrophin TRK receptor signaling pathway	2/174	24/18903	0.0203597541564375	0.0650769656715735	0.0410431273142145	CASP3/SRC	2	0.0833333333333333
GO:0061162	BP	GO:0061162	establishment of monopolar cell polarity	2/174	24/18903	0.0203597541564375	0.0650769656715735	0.0410431273142145	CDC42/RHOA	2	0.0833333333333333
GO:0120255	BP	GO:0120255	olefinic compound biosynthetic process	2/174	24/18903	0.0203597541564375	0.0650769656715735	0.0410431273142145	AKR1C3/HSD17B1	2	0.0833333333333333
GO:2000637	BP	GO:2000637	positive regulation of miRNA-mediated gene silencing	2/174	24/18903	0.0203597541564375	0.0650769656715735	0.0410431273142145	MAP2K1/EGFR	2	0.0833333333333333
GO:0007409	BP	GO:0007409	axonogenesis	9/174	438/18903	0.0203753702168951	0.0650769656715735	0.0410431273142145	MAP2K1/IGF1R/ABL1/GSK3B/FGFR2/PTK2/EPHB4/HSP90AA1/RTN4R	9	0.0205479452054795
GO:1905954	BP	GO:1905954	positive regulation of lipid localization	4/174	113/18903	0.0205681200079733	0.0656312351669376	0.0413926972923143	MIF/RXRA/NR1H3/FABP3	4	0.0353982300884956
GO:0032535	BP	GO:0032535	regulation of cellular component size	8/174	367/18903	0.0205837092265342	0.0656312351669376	0.0413926972923143	RAB11A/ABL1/RAB5A/GRB2/GSK3B/RHOA/HSP90AA1/RTN4R	8	0.0217983651226158
GO:0071692	BP	GO:0071692	protein localization to extracellular region	8/174	368/18903	0.0208816618510477	0.0665250240727636	0.0419563973891962	HMGCR/PPIA/NR1H4/TGFB2/NR1H3/PPARD/FGG/HADH	8	0.0217391304347826
GO:0060560	BP	GO:0060560	developmental growth involved in morphogenesis	6/174	233/18903	0.0210225878444178	0.0669174694929486	0.0422039071982095	ABL1/PAK6/GSK3B/FGFR2/HSP90AA1/RTN4R	6	0.0257510729613734
GO:0046661	BP	GO:0046661	male sex differentiation	5/174	171/18903	0.021113636873003	0.0671381564126229	0.0423430913357504	INSR/CTNNA1/AKR1C3/TGFB2/AR	5	0.0292397660818713
GO:0009311	BP	GO:0009311	oligosaccharide metabolic process	3/174	64/18903	0.0211987126955021	0.0671381564126229	0.0423430913357504	HEXB/MAN1B1/GM2A	3	0.046875
GO:0019229	BP	GO:0019229	regulation of vasoconstriction	3/174	64/18903	0.0211987126955021	0.0671381564126229	0.0423430913357504	ABL1/RHOA/FGG	3	0.046875
GO:0048002	BP	GO:0048002	antigen processing and presentation of peptide antigen	3/174	64/18903	0.0211987126955021	0.0671381564126229	0.0423430913357504	AZGP1/CD209/CTSD	3	0.046875
GO:0048524	BP	GO:0048524	positive regulation of viral process	3/174	64/18903	0.0211987126955021	0.0671381564126229	0.0423430913357504	PPIA/PPARA/CD209	3	0.046875
GO:0071384	BP	GO:0071384	cellular response to corticosteroid stimulus	3/174	64/18903	0.0211987126955021	0.0671381564126229	0.0423430913357504	EIF4E/IGF1R/AKR1C3	3	0.046875
GO:0071356	BP	GO:0071356	cellular response to tumor necrosis factor	6/174	234/18903	0.0214168900600532	0.067772239351108	0.0427429985303076	AKT1/XIAP/MAPK1/NR1H4/STAT1/MAPK14	6	0.0256410256410256
GO:0007254	BP	GO:0007254	JNK cascade	5/174	172/18903	0.0215891622780398	0.0682029481681457	0.0430146405257603	XIAP/IGF1R/MAPK8/MMP8/EGFR	5	0.0290697674418605
GO:1990138	BP	GO:1990138	neuron projection extension	5/174	172/18903	0.0215891622780398	0.0682029481681457	0.0430146405257603	ABL1/PAK6/GSK3B/HSP90AA1/RTN4R	5	0.0290697674418605
GO:2000116	BP	GO:2000116	regulation of cysteine-type endopeptidase activity	6/174	235/18903	0.0218161757446804	0.0684249640552304	0.0431546628243626	AKT1/XIAP/CSNK2A1/RHOA/SRC/CTSD	6	0.025531914893617
GO:0003081	BP	GO:0003081	regulation of systemic arterial blood pressure by renin-angiotensin	2/174	25/18903	0.0219980798565702	0.0684249640552304	0.0431546628243626	RHOA/CTSG	2	0.08
GO:0003148	BP	GO:0003148	outflow tract septum morphogenesis	2/174	25/18903	0.0219980798565702	0.0684249640552304	0.0431546628243626	FGFR2/TGFB2	2	0.08
GO:0006007	BP	GO:0006007	glucose catabolic process	2/174	25/18903	0.0219980798565702	0.0684249640552304	0.0431546628243626	HK1/TPI1	2	0.08
GO:0009162	BP	GO:0009162	deoxyribonucleoside monophosphate metabolic process	2/174	25/18903	0.0219980798565702	0.0684249640552304	0.0431546628243626	ADK/PNP	2	0.08
GO:0035330	BP	GO:0035330	regulation of hippo signaling	2/174	25/18903	0.0219980798565702	0.0684249640552304	0.0431546628243626	SRC/MAPK14	2	0.08
GO:0045980	BP	GO:0045980	negative regulation of nucleotide metabolic process	2/174	25/18903	0.0219980798565702	0.0684249640552304	0.0431546628243626	PARP1/PPARA	2	0.08
GO:0046697	BP	GO:0046697	decidualization	2/174	25/18903	0.0219980798565702	0.0684249640552304	0.0431546628243626	PARP1/PPARD	2	0.08
GO:0050927	BP	GO:0050927	positive regulation of positive chemotaxis	2/174	25/18903	0.0219980798565702	0.0684249640552304	0.0431546628243626	PGF/KDR	2	0.08
GO:0060148	BP	GO:0060148	positive regulation of post-transcriptional gene silencing	2/174	25/18903	0.0219980798565702	0.0684249640552304	0.0431546628243626	MAP2K1/EGFR	2	0.08
GO:0060396	BP	GO:0060396	growth hormone receptor signaling pathway	2/174	25/18903	0.0219980798565702	0.0684249640552304	0.0431546628243626	PTPN1/PTK2	2	0.08
GO:0061339	BP	GO:0061339	establishment or maintenance of monopolar cell polarity	2/174	25/18903	0.0219980798565702	0.0684249640552304	0.0431546628243626	CDC42/RHOA	2	0.08
GO:0071378	BP	GO:0071378	cellular response to growth hormone stimulus	2/174	25/18903	0.0219980798565702	0.0684249640552304	0.0431546628243626	PTPN1/PTK2	2	0.08
GO:1900078	BP	GO:1900078	positive regulation of cellular response to insulin stimulus	2/174	25/18903	0.0219980798565702	0.0684249640552304	0.0431546628243626	NR1H4/SRC	2	0.08
GO:1900370	BP	GO:1900370	positive regulation of post-transcriptional gene silencing by RNA	2/174	25/18903	0.0219980798565702	0.0684249640552304	0.0431546628243626	MAP2K1/EGFR	2	0.08
GO:1901028	BP	GO:1901028	regulation of mitochondrial outer membrane permeabilization involved in apoptotic signaling pathway	2/174	25/18903	0.0219980798565702	0.0684249640552304	0.0431546628243626	MAPK8/GSK3B	2	0.08
GO:2000193	BP	GO:2000193	positive regulation of fatty acid transport	2/174	25/18903	0.0219980798565702	0.0684249640552304	0.0431546628243626	MIF/FABP3	2	0.08
GO:2000209	BP	GO:2000209	regulation of anoikis	2/174	25/18903	0.0219980798565702	0.0684249640552304	0.0431546628243626	PTK2/SRC	2	0.08
GO:0043588	BP	GO:0043588	skin development	7/174	302/18903	0.0220041042945373	0.0684249640552304	0.0431546628243626	ST14/MAP2K1/AKR1C3/CASP3/FGFR2/TGFB2/EGFR	7	0.0231788079470199
GO:0016126	BP	GO:0016126	sterol biosynthetic process	3/174	65/18903	0.0220776667084244	0.0684280680560205	0.0431566204740209	HMGCR/FDPS/SEC14L2	3	0.0461538461538462
GO:0031100	BP	GO:0031100	animal organ regeneration	3/174	65/18903	0.0220776667084244	0.0684280680560205	0.0431566204740209	CCNA2/ATIC/PGF	3	0.0461538461538462
GO:0033013	BP	GO:0033013	tetrapyrrole metabolic process	3/174	65/18903	0.0220776667084244	0.0684280680560205	0.0431566204740209	BLVRB/FECH/ALAD	3	0.0461538461538462
GO:0050435	BP	GO:0050435	amyloid-beta metabolic process	3/174	65/18903	0.0220776667084244	0.0684280680560205	0.0431566204740209	MME/CASP3/BACE1	3	0.0461538461538462
GO:0045862	BP	GO:0045862	positive regulation of proteolysis	8/174	372/18903	0.022104196946241	0.068454048342546	0.0431730058754685	AKT1/HPN/MDM2/GSK3B/PTK2/RHOA/SRC/CTSD	8	0.021505376344086
GO:0002832	BP	GO:0002832	negative regulation of response to biotic stimulus	4/174	116/18903	0.0223981055701883	0.0692505362383199	0.0436753395932921	ARG2/PARP1/NR1H3/MMP12	4	0.0344827586206897
GO:0030518	BP	GO:0030518	intracellular steroid hormone receptor signaling pathway	4/174	116/18903	0.0223981055701883	0.0692505362383199	0.0436753395932921	PARP1/RHOA/SRC/AR	4	0.0344827586206897
GO:0006937	BP	GO:0006937	regulation of muscle contraction	5/174	174/18903	0.0225610348628685	0.0696971527458968	0.0439570143455173	PDE4B/PRKACA/RHOA/GSTO1/HSP90AA1	5	0.028735632183908
GO:0051047	BP	GO:0051047	positive regulation of secretion	7/174	304/18903	0.0227116445758816	0.0701050109167149	0.0442142447596628	MIF/PPIA/RAB5A/NR1H4/TGFB2/PPARD/FGG	7	0.0230263157894737
GO:0010812	BP	GO:0010812	negative regulation of cell-substrate adhesion	3/174	66/18903	0.0229762921197	0.0707482235718435	0.0446199099381499	RHOA/SRC/MMP12	3	0.0454545454545455
GO:0034605	BP	GO:0034605	cellular response to heat	3/174	66/18903	0.0229762921197	0.0707482235718435	0.0446199099381499	GSK3B/PRKACA/HSP90AA1	3	0.0454545454545455
GO:1903051	BP	GO:1903051	negative regulation of proteolysis involved in protein catabolic process	3/174	66/18903	0.0229762921197	0.0707482235718435	0.0446199099381499	ALAD/CSNK2A1/FHIT	3	0.0454545454545455
GO:0050804	BP	GO:0050804	modulation of chemical synaptic transmission	9/174	448/18903	0.0231637138818704	0.0712671523347595	0.0449471910131597	EIF4E/MME/ABL1/RAB5A/MAPK1/GSK3B/PRKACA/SRC/BACE1	9	0.0200892857142857
GO:0050670	BP	GO:0050670	regulation of lymphocyte proliferation	6/174	239/18903	0.0234636531590074	0.0718290685325074	0.0453015836589459	ARG2/MIF/LGALS3/PNP/CASP3/CD209	6	0.0251046025104603
GO:0022900	BP	GO:0022900	electron transport chain	5/174	176/18903	0.0235608890575561	0.0718290685325074	0.0453015836589459	ADH5/ME2/GSR/ALDH2/NQO2	5	0.0284090909090909
GO:0009164	BP	GO:0009164	nucleoside catabolic process	2/174	26/18903	0.0236891201628948	0.0718290685325074	0.0453015836589459	AHCY/PNP	2	0.0769230769230769
GO:0010882	BP	GO:0010882	regulation of cardiac muscle contraction by calcium ion signaling	2/174	26/18903	0.0236891201628948	0.0718290685325074	0.0453015836589459	PRKACA/GSTO1	2	0.0769230769230769
GO:0010954	BP	GO:0010954	positive regulation of protein processing	2/174	26/18903	0.0236891201628948	0.0718290685325074	0.0453015836589459	HPN/SRC	2	0.0769230769230769
GO:0033622	BP	GO:0033622	integrin activation	2/174	26/18903	0.0236891201628948	0.0718290685325074	0.0453015836589459	SRC/SELP	2	0.0769230769230769
GO:0035994	BP	GO:0035994	response to muscle stretch	2/174	26/18903	0.0236891201628948	0.0718290685325074	0.0453015836589459	PTK2/MAPK14	2	0.0769230769230769
GO:0036119	BP	GO:0036119	response to platelet-derived growth factor	2/174	26/18903	0.0236891201628948	0.0718290685325074	0.0453015836589459	CCNA2/SRC	2	0.0769230769230769
GO:0042178	BP	GO:0042178	xenobiotic catabolic process	2/174	26/18903	0.0236891201628948	0.0718290685325074	0.0453015836589459	CYP2C9/GSTO1	2	0.0769230769230769
GO:0044346	BP	GO:0044346	fibroblast apoptotic process	2/174	26/18903	0.0236891201628948	0.0718290685325074	0.0453015836589459	CASP7/CASP3	2	0.0769230769230769
GO:0050926	BP	GO:0050926	regulation of positive chemotaxis	2/174	26/18903	0.0236891201628948	0.0718290685325074	0.0453015836589459	PGF/KDR	2	0.0769230769230769
GO:0050995	BP	GO:0050995	negative regulation of lipid catabolic process	2/174	26/18903	0.0236891201628948	0.0718290685325074	0.0453015836589459	AKT1/PDE3B	2	0.0769230769230769
GO:0051894	BP	GO:0051894	positive regulation of focal adhesion assembly	2/174	26/18903	0.0236891201628948	0.0718290685325074	0.0453015836589459	ABL1/KDR	2	0.0769230769230769
GO:0060333	BP	GO:0060333	interferon-gamma-mediated signaling pathway	2/174	26/18903	0.0236891201628948	0.0718290685325074	0.0453015836589459	STAT1/NR1H3	2	0.0769230769230769
GO:0060740	BP	GO:0060740	prostate gland epithelium morphogenesis	2/174	26/18903	0.0236891201628948	0.0718290685325074	0.0453015836589459	FGFR2/AR	2	0.0769230769230769
GO:1903798	BP	GO:1903798	regulation of miRNA maturation	2/174	26/18903	0.0236891201628948	0.0718290685325074	0.0453015836589459	MAP2K1/EGFR	2	0.0769230769230769
GO:1903901	BP	GO:1903901	negative regulation of viral life cycle	2/174	26/18903	0.0236891201628948	0.0718290685325074	0.0453015836589459	PPIA/APCS	2	0.0769230769230769
GO:1905523	BP	GO:1905523	positive regulation of macrophage migration	2/174	26/18903	0.0236891201628948	0.0718290685325074	0.0453015836589459	MAPK1/PTK2	2	0.0769230769230769
GO:0031638	BP	GO:0031638	zymogen activation	3/174	67/18903	0.0238945870372603	0.072219857615822	0.0455480488395819	HPN/FGG/PLAU	3	0.0447761194029851
GO:0051205	BP	GO:0051205	protein insertion into membrane	3/174	67/18903	0.0238945870372603	0.072219857615822	0.0455480488395819	MAPK8/EGFR/HSP90AA1	3	0.0447761194029851
GO:1901224	BP	GO:1901224	positive regulation of NIK/NF-kappaB signaling	3/174	67/18903	0.0238945870372603	0.072219857615822	0.0455480488395819	MMP8/RHOA/EGFR	3	0.0447761194029851
GO:1904377	BP	GO:1904377	positive regulation of protein localization to cell periphery	3/174	67/18903	0.0238945870372603	0.072219857615822	0.0455480488395819	AKT1/LGALS3/EGFR	3	0.0447761194029851
GO:0043534	BP	GO:0043534	blood vessel endothelial cell migration	5/174	177/18903	0.0240713889853648	0.0726378234022368	0.0458116539847785	AKT1/ABL1/RHOA/EPHB4/KDR	5	0.0282485875706215
GO:0051099	BP	GO:0051099	positive regulation of binding	5/174	177/18903	0.0240713889853648	0.0726378234022368	0.0458116539847785	ABL1/FKBP1A/PARP1/GSK3B/MMP8	5	0.0282485875706215
GO:0055074	BP	GO:0055074	calcium ion homeostasis	7/174	309/18903	0.0245491348411319	0.0740202530941242	0.046683532955495	ABL1/FKBP1A/HEXB/PRKACA/GP1BA/KDR/GSTO1	7	0.0226537216828479
GO:0001659	BP	GO:0001659	temperature homeostasis	5/174	178/18903	0.0245889786515461	0.0740811721035397	0.0467219537182563	FABP5/IGF1R/RHEB/NR1H3/HADH	5	0.0280898876404494
GO:0038034	BP	GO:0038034	signal transduction in absence of ligand	3/174	68/18903	0.0248325440595169	0.0745173875835305	0.0469970686886138	AKT1/CTNNA1/GSK3B	3	0.0441176470588235
GO:0042987	BP	GO:0042987	amyloid precursor protein catabolic process	3/174	68/18903	0.0248325440595169	0.0745173875835305	0.0469970686886138	FKBP1A/CASP3/BACE1	3	0.0441176470588235
GO:0043550	BP	GO:0043550	regulation of lipid kinase activity	3/174	68/18903	0.0248325440595169	0.0745173875835305	0.0469970686886138	CDC42/PTK2/SRC	3	0.0441176470588235
GO:0097192	BP	GO:0097192	extrinsic apoptotic signaling pathway in absence of ligand	3/174	68/18903	0.0248325440595169	0.0745173875835305	0.0469970686886138	AKT1/CTNNA1/GSK3B	3	0.0441176470588235
GO:1902808	BP	GO:1902808	positive regulation of cell cycle G1/S phase transition	3/174	68/18903	0.0248325440595169	0.0745173875835305	0.0469970686886138	AKT1/MDM2/EGFR	3	0.0441176470588235
GO:0060759	BP	GO:0060759	regulation of response to cytokine stimulus	5/174	179/18903	0.0251136881046183	0.0753011379416696	0.0474913690205317	XIAP/NR1H4/PTPN1/NR1H3/MMP12	5	0.0279329608938547
GO:0032944	BP	GO:0032944	regulation of mononuclear cell proliferation	6/174	243/18903	0.0251928295092816	0.0754784375766561	0.0476031894076137	ARG2/MIF/LGALS3/PNP/CASP3/CD209	6	0.0246913580246914
GO:0001573	BP	GO:0001573	ganglioside metabolic process	2/174	27/18903	0.0254317776448566	0.0755939048671388	0.0476760130043349	HEXB/GM2A	2	0.0740740740740741
GO:0002092	BP	GO:0002092	positive regulation of receptor internalization	2/174	27/18903	0.0254317776448566	0.0755939048671388	0.0476760130043349	INSR/SELE	2	0.0740740740740741
GO:0003171	BP	GO:0003171	atrioventricular valve development	2/174	27/18903	0.0254317776448566	0.0755939048671388	0.0476760130043349	MDM2/TGFB2	2	0.0740740740740741
GO:0009065	BP	GO:0009065	glutamine family amino acid catabolic process	2/174	27/18903	0.0254317776448566	0.0755939048671388	0.0476760130043349	ARG2/OAT	2	0.0740740740740741
GO:0010875	BP	GO:0010875	positive regulation of cholesterol efflux	2/174	27/18903	0.0254317776448566	0.0755939048671388	0.0476760130043349	RXRA/NR1H3	2	0.0740740740740741
GO:0032682	BP	GO:0032682	negative regulation of chemokine production	2/174	27/18903	0.0254317776448566	0.0755939048671388	0.0476760130043349	ARG2/NR1H4	2	0.0740740740740741
GO:0035774	BP	GO:0035774	positive regulation of insulin secretion involved in cellular response to glucose stimulus	2/174	27/18903	0.0254317776448566	0.0755939048671388	0.0476760130043349	NR1H4/PPARD	2	0.0740740740740741
GO:0071549	BP	GO:0071549	cellular response to dexamethasone stimulus	2/174	27/18903	0.0254317776448566	0.0755939048671388	0.0476760130043349	EIF4E/IGF1R	2	0.0740740740740741
GO:0072207	BP	GO:0072207	metanephric epithelium development	2/174	27/18903	0.0254317776448566	0.0755939048671388	0.0476760130043349	ACAT1/STAT1	2	0.0740740740740741
GO:1904357	BP	GO:1904357	negative regulation of telomere maintenance via telomere lengthening	2/174	27/18903	0.0254317776448566	0.0755939048671388	0.0476760130043349	PARP1/SRC	2	0.0740740740740741
GO:0050954	BP	GO:0050954	sensory perception of mechanical stimulus	5/174	180/18903	0.0256455467179837	0.0760299942977478	0.0479510484771195	HPN/THRB/HEXB/CASP3/BACE1	5	0.0277777777777778
GO:0000077	BP	GO:0000077	DNA damage checkpoint signaling	4/174	121/18903	0.025662804255751	0.0760299942977478	0.0479510484771195	DOT1L/MDM2/CDK2/MAPK14	4	0.0330578512396694
GO:0031623	BP	GO:0031623	receptor internalization	4/174	121/18903	0.025662804255751	0.0760299942977478	0.0479510484771195	INSR/RAB5A/GRB2/SELE	4	0.0330578512396694
GO:0051101	BP	GO:0051101	regulation of DNA binding	4/174	121/18903	0.025662804255751	0.0760299942977478	0.0479510484771195	DOT1L/PARP1/MAPK8/MMP8	4	0.0330578512396694
GO:0002429	BP	GO:0002429	immune response-activating cell surface receptor signaling pathway	7/174	312/18903	0.0256994280831465	0.0760299942977478	0.0479510484771195	PDE4B/CSK/ABL1/LGALS3/MAPK1/PTK2/SRC	7	0.0224358974358974
GO:0002757	BP	GO:0002757	immune response-activating signal transduction	7/174	312/18903	0.0256994280831465	0.0760299942977478	0.0479510484771195	PDE4B/CSK/ABL1/LGALS3/MAPK1/PTK2/SRC	7	0.0224358974358974
GO:0007004	BP	GO:0007004	telomere maintenance via telomerase	3/174	69/18903	0.0257901504102912	0.0761192858745057	0.048007363419206	MAPK1/SRC/HSP90AA1	3	0.0434782608695652
GO:0034394	BP	GO:0034394	protein localization to cell surface	3/174	69/18903	0.0257901504102912	0.0761192858745057	0.048007363419206	AKT1/RAB11A/ERBB4	3	0.0434782608695652
GO:2000401	BP	GO:2000401	regulation of lymphocyte migration	3/174	69/18903	0.0257901504102912	0.0761192858745057	0.048007363419206	AKT1/ABL1/RHOA	3	0.0434782608695652
GO:0006941	BP	GO:0006941	striated muscle contraction	5/174	181/18903	0.0261845831875388	0.0772230240683317	0.0487034755802952	ARG2/PDE4B/PRKACA/GSTO1/HSP90AA1	5	0.0276243093922652
GO:0030278	BP	GO:0030278	regulation of ossification	4/174	122/18903	0.0263482790789399	0.0775239537330432	0.0488932676889763	MAPK1/RXRA/TGFB2/MAPK14	4	0.0327868852459016
GO:0048675	BP	GO:0048675	axon extension	4/174	122/18903	0.0263482790789399	0.0775239537330432	0.0488932676889763	ABL1/GSK3B/HSP90AA1/RTN4R	4	0.0327868852459016
GO:1901989	BP	GO:1901989	positive regulation of cell cycle phase transition	4/174	122/18903	0.0263482790789399	0.0775239537330432	0.0488932676889763	AKT1/RAB11A/MDM2/EGFR	4	0.0327868852459016
GO:0006909	BP	GO:0006909	phagocytosis	7/174	314/18903	0.0264865031780232	0.0778699064594727	0.0491114552096915	CDC42/CSK/ABL1/RAB5A/NR1H3/PTK2/SRC	7	0.0222929936305732
GO:0042129	BP	GO:0042129	regulation of T cell proliferation	5/174	182/18903	0.0267308255294459	0.0784511171760044	0.0494780166372077	ARG2/LGALS3/PNP/CASP3/CD209	5	0.0274725274725275
GO:0097553	BP	GO:0097553	calcium ion transmembrane import into cytosol	5/174	182/18903	0.0267308255294459	0.0784511171760044	0.0494780166372077	ABL1/FKBP1A/PRKACA/GP1BA/GSTO1	5	0.0274725274725275
GO:0014823	BP	GO:0014823	response to activity	3/174	70/18903	0.0267673880714522	0.0784511171760044	0.0494780166372077	ALAD/PPARD/HADH	3	0.0428571428571429
GO:0030193	BP	GO:0030193	regulation of blood coagulation	3/174	70/18903	0.0267673880714522	0.0784511171760044	0.0494780166372077	GP1BA/FGG/PLAU	3	0.0428571428571429
GO:0072655	BP	GO:0072655	establishment of protein localization to mitochondrion	4/174	123/18903	0.0270446736454104	0.0792022585329876	0.0499517509305553	AKT1/HK1/MAPK8/HSP90AA1	4	0.032520325203252
GO:0003416	BP	GO:0003416	endochondral bone growth	2/174	28/18903	0.0272249704041818	0.0793605783342918	0.0500516010033766	RARB/FGFR2	2	0.0714285714285714
GO:0030878	BP	GO:0030878	thyroid gland development	2/174	28/18903	0.0272249704041818	0.0793605783342918	0.0500516010033766	MAP2K1/MAPK1	2	0.0714285714285714
GO:0060512	BP	GO:0060512	prostate gland morphogenesis	2/174	28/18903	0.0272249704041818	0.0793605783342918	0.0500516010033766	FGFR2/AR	2	0.0714285714285714
GO:0070920	BP	GO:0070920	regulation of production of small RNA involved in gene silencing by RNA	2/174	28/18903	0.0272249704041818	0.0793605783342918	0.0500516010033766	MAP2K1/EGFR	2	0.0714285714285714
GO:1903319	BP	GO:1903319	positive regulation of protein maturation	2/174	28/18903	0.0272249704041818	0.0793605783342918	0.0500516010033766	HPN/SRC	2	0.0714285714285714
GO:1904385	BP	GO:1904385	cellular response to angiotensin	2/174	28/18903	0.0272249704041818	0.0793605783342918	0.0500516010033766	IGF1R/SRC	2	0.0714285714285714
GO:0007219	BP	GO:0007219	Notch signaling pathway	5/174	183/18903	0.0272843010780622	0.0794107898660884	0.050083268710543	AKT1/NR1H4/CDK6/TGFB2/SRC	5	0.0273224043715847
GO:0008361	BP	GO:0008361	regulation of cell size	5/174	183/18903	0.0272843010780622	0.0794107898660884	0.050083268710543	ABL1/GSK3B/RHOA/HSP90AA1/RTN4R	5	0.0273224043715847
GO:0003208	BP	GO:0003208	cardiac ventricle morphogenesis	3/174	71/18903	0.0277642339132951	0.0806831204321642	0.0508857097105239	FKBP1A/FGFR2/TGFB2	3	0.0422535211267606
GO:0061077	BP	GO:0061077	chaperone-mediated protein folding	3/174	71/18903	0.0277642339132951	0.0806831204321642	0.0508857097105239	FKBP1A/CSNK2A1/HSPA8	3	0.0422535211267606
GO:0006644	BP	GO:0006644	phospholipid metabolic process	8/174	389/18903	0.0278677196088761	0.0809215075940574	0.0510360571419796	FABP5/FDPS/IMPA1/NR1H4/HEXB/NR1H3/PPARD/FABP3	8	0.0205655526992288
GO:0032200	BP	GO:0032200	telomere organization	5/174	185/18903	0.0284130577124971	0.082378211907409	0.0519547800722064	DOT1L/PARP1/MAPK1/SRC/HSP90AA1	5	0.027027027027027
GO:2000045	BP	GO:2000045	regulation of G1/S transition of mitotic cell cycle	5/174	185/18903	0.0284130577124971	0.082378211907409	0.0519547800722064	AKT1/CDK7/MDM2/EGFR/CDK2	5	0.027027027027027
GO:0035567	BP	GO:0035567	non-canonical Wnt signaling pathway	3/174	72/18903	0.0287806598226929	0.0829974379596312	0.0523453172374746	CDC42/ABL1/RHOA	3	0.0416666666666667
GO:0045600	BP	GO:0045600	positive regulation of fat cell differentiation	3/174	72/18903	0.0287806598226929	0.0829974379596312	0.0523453172374746	AKT1/PPARD/MAPK14	3	0.0416666666666667
GO:0046626	BP	GO:0046626	regulation of insulin receptor signaling pathway	3/174	72/18903	0.0287806598226929	0.0829974379596312	0.0523453172374746	NR1H4/PTPN1/SRC	3	0.0416666666666667
GO:0050709	BP	GO:0050709	negative regulation of protein secretion	3/174	72/18903	0.0287806598226929	0.0829974379596312	0.0523453172374746	HMGCR/NR1H3/HADH	3	0.0416666666666667
GO:0060411	BP	GO:0060411	cardiac septum morphogenesis	3/174	72/18903	0.0287806598226929	0.0829974379596312	0.0523453172374746	MDM2/FGFR2/TGFB2	3	0.0416666666666667
GO:1900046	BP	GO:1900046	regulation of hemostasis	3/174	72/18903	0.0287806598226929	0.0829974379596312	0.0523453172374746	GP1BA/FGG/PLAU	3	0.0416666666666667
GO:1900076	BP	GO:1900076	regulation of cellular response to insulin stimulus	3/174	72/18903	0.0287806598226929	0.0829974379596312	0.0523453172374746	NR1H4/PTPN1/SRC	3	0.0416666666666667
GO:0006656	BP	GO:0006656	phosphatidylcholine biosynthetic process	2/174	29/18903	0.029067631884632	0.0831890041493413	0.0524661353400434	FABP5/FABP3	2	0.0689655172413793
GO:0007263	BP	GO:0007263	nitric oxide mediated signal transduction	2/174	29/18903	0.029067631884632	0.0831890041493413	0.0524661353400434	CBS/EGFR	2	0.0689655172413793
GO:0010592	BP	GO:0010592	positive regulation of lamellipodium assembly	2/174	29/18903	0.029067631884632	0.0831890041493413	0.0524661353400434	CDC42/HSP90AA1	2	0.0689655172413793
GO:0010804	BP	GO:0010804	negative regulation of tumor necrosis factor-mediated signaling pathway	2/174	29/18903	0.029067631884632	0.0831890041493413	0.0524661353400434	XIAP/NR1H4	2	0.0689655172413793
GO:0010955	BP	GO:0010955	negative regulation of protein processing	2/174	29/18903	0.029067631884632	0.0831890041493413	0.0524661353400434	XIAP/PLAU	2	0.0689655172413793
GO:0031571	BP	GO:0031571	mitotic G1 DNA damage checkpoint signaling	2/174	29/18903	0.029067631884632	0.0831890041493413	0.0524661353400434	MDM2/CDK2	2	0.0689655172413793
GO:0032607	BP	GO:0032607	interferon-alpha production	2/174	29/18903	0.029067631884632	0.0831890041493413	0.0524661353400434	STAT1/MMP12	2	0.0689655172413793
GO:0032647	BP	GO:0032647	regulation of interferon-alpha production	2/174	29/18903	0.029067631884632	0.0831890041493413	0.0524661353400434	STAT1/MMP12	2	0.0689655172413793
GO:0097066	BP	GO:0097066	response to thyroid hormone	2/174	29/18903	0.029067631884632	0.0831890041493413	0.0524661353400434	HPN/THRB	2	0.0689655172413793
GO:1903318	BP	GO:1903318	negative regulation of protein maturation	2/174	29/18903	0.029067631884632	0.0831890041493413	0.0524661353400434	XIAP/PLAU	2	0.0689655172413793
GO:0003206	BP	GO:0003206	cardiac chamber morphogenesis	4/174	126/18903	0.0291996537420319	0.0834402226628367	0.0526245753245552	FKBP1A/MDM2/FGFR2/TGFB2	4	0.0317460317460317
GO:0003231	BP	GO:0003231	cardiac ventricle development	4/174	126/18903	0.0291996537420319	0.0834402226628367	0.0526245753245552	FKBP1A/MDM2/FGFR2/TGFB2	4	0.0317460317460317
GO:0001701	BP	GO:0001701	in utero embryonic development	8/174	393/18903	0.0293623782883283	0.0838417039391175	0.0528777839209705	AKT1/ST14/MAP2K1/MAPK1/GRB2/FGFR2/EGFR/AR	8	0.0203562340966921
GO:1903320	BP	GO:1903320	regulation of protein modification by small protein conjugation or removal	6/174	252/18903	0.0293897543276389	0.0838563943448214	0.0528870489533114	AKT1/XIAP/ABL1/FKBP1A/PPIA/HSP90AA1	6	0.0238095238095238
GO:0019362	BP	GO:0019362	pyridine nucleotide metabolic process	3/174	73/18903	0.0298166328290533	0.0846900143307147	0.0534128013583232	NQO1/ME2/NMNAT1	3	0.0410958904109589
GO:0046496	BP	GO:0046496	nicotinamide nucleotide metabolic process	3/174	73/18903	0.0298166328290533	0.0846900143307147	0.0534128013583232	NQO1/ME2/NMNAT1	3	0.0410958904109589
GO:0060415	BP	GO:0060415	muscle tissue morphogenesis	3/174	73/18903	0.0298166328290533	0.0846900143307147	0.0534128013583232	FKBP1A/FGFR2/TGFB2	3	0.0410958904109589
GO:0071677	BP	GO:0071677	positive regulation of mononuclear cell migration	3/174	73/18903	0.0298166328290533	0.0846900143307147	0.0534128013583232	ABL1/LGALS3/RHOA	3	0.0410958904109589
GO:1903578	BP	GO:1903578	regulation of ATP metabolic process	3/174	73/18903	0.0298166328290533	0.0846900143307147	0.0534128013583232	INSR/PARP1/PPARA	3	0.0410958904109589
GO:1904888	BP	GO:1904888	cranial skeletal system development	3/174	73/18903	0.0298166328290533	0.0846900143307147	0.0534128013583232	MTHFD1/FGFR2/TGFB2	3	0.0410958904109589
GO:1903169	BP	GO:1903169	regulation of calcium ion transmembrane transport	5/174	188/18903	0.0301610856697138	0.0856039241129875	0.0539891914090952	PDE4B/ABL1/FKBP1A/PRKACA/GSTO1	5	0.0265957446808511
GO:0030218	BP	GO:0030218	erythrocyte differentiation	4/174	128/18903	0.0306913861817343	0.086822495687526	0.0547577273689258	CDK6/STAT1/CASP3/MAPK14	4	0.03125
GO:0050868	BP	GO:0050868	negative regulation of T cell activation	4/174	128/18903	0.0306913861817343	0.086822495687526	0.0547577273689258	ARG2/LGALS3/CASP3/CTSG	4	0.03125
GO:0070585	BP	GO:0070585	protein localization to mitochondrion	4/174	128/18903	0.0306913861817343	0.086822495687526	0.0547577273689258	AKT1/HK1/MAPK8/HSP90AA1	4	0.03125
GO:0071478	BP	GO:0071478	cellular response to radiation	5/174	189/18903	0.0307584960772051	0.086822495687526	0.0547577273689258	MME/PARP1/MDM2/GRB2/MAPK14	5	0.0264550264550265
GO:0003281	BP	GO:0003281	ventricular septum development	3/174	74/18903	0.0308721152281128	0.086822495687526	0.0547577273689258	MDM2/FGFR2/TGFB2	3	0.0405405405405405
GO:0045123	BP	GO:0045123	cellular extravasation	3/174	74/18903	0.0308721152281128	0.086822495687526	0.0547577273689258	GP1BA/SELE/SELP	3	0.0405405405405405
GO:0050688	BP	GO:0050688	regulation of defense response to virus	3/174	74/18903	0.0308721152281128	0.086822495687526	0.0547577273689258	STAT1/HSP90AA1/MMP12	3	0.0405405405405405
GO:2000573	BP	GO:2000573	positive regulation of DNA biosynthetic process	3/174	74/18903	0.0308721152281128	0.086822495687526	0.0547577273689258	MAPK1/SRC/HSP90AA1	3	0.0405405405405405
GO:2000628	BP	GO:2000628	regulation of miRNA metabolic process	3/174	74/18903	0.0308721152281128	0.086822495687526	0.0547577273689258	PPARA/TGFB2/PPARD	3	0.0405405405405405
GO:0043122	BP	GO:0043122	regulation of I-kappaB kinase/NF-kappaB signaling	6/174	255/18903	0.030885004090403	0.086822495687526	0.0547577273689258	ABL1/FKBP1A/NR1H4/STAT1/RHOA/PPP5C	6	0.0235294117647059
GO:0002253	BP	GO:0002253	activation of immune response	8/174	397/18903	0.0309115983413139	0.086822495687526	0.0547577273689258	PDE4B/CSK/ABL1/LGALS3/MAPK1/PTK2/SRC/HSP90AA1	8	0.0201511335012594
GO:0007202	BP	GO:0007202	activation of phospholipase C activity	2/174	30/18903	0.0309587106839137	0.086822495687526	0.0547577273689258	SELE/EGFR	2	0.0666666666666667
GO:0009072	BP	GO:0009072	aromatic amino acid family metabolic process	2/174	30/18903	0.0309587106839137	0.086822495687526	0.0547577273689258	GSTZ1/GCDH	2	0.0666666666666667
GO:0044819	BP	GO:0044819	mitotic G1/S transition checkpoint signaling	2/174	30/18903	0.0309587106839137	0.086822495687526	0.0547577273689258	MDM2/CDK2	2	0.0666666666666667
GO:0090330	BP	GO:0090330	regulation of platelet aggregation	2/174	30/18903	0.0309587106839137	0.086822495687526	0.0547577273689258	FGG/CTSG	2	0.0666666666666667
GO:1902914	BP	GO:1902914	regulation of protein polyubiquitination	2/174	30/18903	0.0309587106839137	0.086822495687526	0.0547577273689258	XIAP/PPIA	2	0.0666666666666667
GO:0031647	BP	GO:0031647	regulation of protein stability	7/174	325/18903	0.0311108988983991	0.087184480419585	0.0549860260501932	CDK7/MDM2/MAPK1/HSPA8/CASP3/SRC/HSP90AA1	7	0.0215384615384615
GO:0044772	BP	GO:0044772	mitotic cell cycle phase transition	9/174	473/18903	0.0313133057017433	0.0876865546451192	0.0553026772054388	AKT1/RAB11A/EIF4E/CDK7/MDM2/CCNA2/CDK6/EGFR/CDK2	9	0.0190274841437632
GO:0031570	BP	GO:0031570	DNA integrity checkpoint signaling	4/174	129/18903	0.0314538420379804	0.0878843645683423	0.0554274331429518	DOT1L/MDM2/CDK2/MAPK14	4	0.0310077519379845
GO:0051224	BP	GO:0051224	negative regulation of protein transport	4/174	129/18903	0.0314538420379804	0.0878843645683423	0.0554274331429518	HMGCR/CSK/NR1H3/HADH	4	0.0310077519379845
GO:2000027	BP	GO:2000027	regulation of animal organ morphogenesis	4/174	129/18903	0.0314538420379804	0.0878843645683423	0.0554274331429518	CDC42/ABL1/RHOA/AR	4	0.0310077519379845
GO:0006898	BP	GO:0006898	receptor-mediated endocytosis	6/174	257/18903	0.0319090399227965	0.0888674985707769	0.0560474819361377	DPP4/INSR/TNK2/RAB5A/GRB2/SELE	6	0.0233463035019455
GO:0006278	BP	GO:0006278	RNA-templated DNA biosynthetic process	3/174	75/18903	0.0319470647035985	0.0888674985707769	0.0560474819361377	MAPK1/SRC/HSP90AA1	3	0.04
GO:0043536	BP	GO:0043536	positive regulation of blood vessel endothelial cell migration	3/174	75/18903	0.0319470647035985	0.0888674985707769	0.0560474819361377	AKT1/ABL1/KDR	3	0.04
GO:0046323	BP	GO:0046323	glucose import	3/174	75/18903	0.0319470647035985	0.0888674985707769	0.0560474819361377	AKT1/INSR/MAPK14	3	0.04
GO:0060337	BP	GO:0060337	type I interferon signaling pathway	3/174	75/18903	0.0319470647035985	0.0888674985707769	0.0560474819361377	PTPN1/STAT1/MMP12	3	0.04
GO:0071479	BP	GO:0071479	cellular response to ionizing radiation	3/174	75/18903	0.0319470647035985	0.0888674985707769	0.0560474819361377	MDM2/GRB2/MAPK14	3	0.04
GO:0008217	BP	GO:0008217	regulation of blood pressure	5/174	191/18903	0.0319755546615302	0.0888812027879823	0.0560561249932578	ADH5/PPARA/RHOA/CTSG/AR	5	0.0261780104712042
GO:0000413	BP	GO:0000413	protein peptidyl-prolyl isomerization	2/174	31/18903	0.0328971703677186	0.090641436542757	0.0571662796747868	FKBP1A/PPIA	2	0.0645161290322581
GO:0002230	BP	GO:0002230	positive regulation of defense response to virus by host	2/174	31/18903	0.0328971703677186	0.090641436542757	0.0571662796747868	STAT1/HSP90AA1	2	0.0645161290322581
GO:0006783	BP	GO:0006783	heme biosynthetic process	2/174	31/18903	0.0328971703677186	0.090641436542757	0.0571662796747868	FECH/ALAD	2	0.0645161290322581
GO:0009218	BP	GO:0009218	pyrimidine ribonucleotide metabolic process	2/174	31/18903	0.0328971703677186	0.090641436542757	0.0571662796747868	UMPS/DHODH	2	0.0645161290322581
GO:0010880	BP	GO:0010880	regulation of release of sequestered calcium ion into cytosol by sarcoplasmic reticulum	2/174	31/18903	0.0328971703677186	0.090641436542757	0.0571662796747868	PRKACA/GSTO1	2	0.0645161290322581
GO:0031069	BP	GO:0031069	hair follicle morphogenesis	2/174	31/18903	0.0328971703677186	0.090641436542757	0.0571662796747868	FGFR2/TGFB2	2	0.0645161290322581
GO:0034656	BP	GO:0034656	nucleobase-containing small molecule catabolic process	2/174	31/18903	0.0328971703677186	0.090641436542757	0.0571662796747868	AHCY/PNP	2	0.0645161290322581
GO:0034694	BP	GO:0034694	response to prostaglandin	2/174	31/18903	0.0328971703677186	0.090641436542757	0.0571662796747868	AKT1/AKR1C3	2	0.0645161290322581
GO:0072525	BP	GO:0072525	pyridine-containing compound biosynthetic process	2/174	31/18903	0.0328971703677186	0.090641436542757	0.0571662796747868	PNPO/NMNAT1	2	0.0645161290322581
GO:0098868	BP	GO:0098868	bone growth	2/174	31/18903	0.0328971703677186	0.090641436542757	0.0571662796747868	RARB/FGFR2	2	0.0645161290322581
GO:0150117	BP	GO:0150117	positive regulation of cell-substrate junction organization	2/174	31/18903	0.0328971703677186	0.090641436542757	0.0571662796747868	ABL1/KDR	2	0.0645161290322581
GO:1902042	BP	GO:1902042	negative regulation of extrinsic apoptotic signaling pathway via death domain receptors	2/174	31/18903	0.0328971703677186	0.090641436542757	0.0571662796747868	GSK3B/FGG	2	0.0645161290322581
GO:0010822	BP	GO:0010822	positive regulation of mitochondrion organization	3/174	76/18903	0.0330414344467893	0.0909724749878025	0.057375060967917	MAPK8/GSK3B/KDR	3	0.0394736842105263
GO:0051051	BP	GO:0051051	negative regulation of transport	9/174	479/18903	0.0335339086681343	0.0922610528783389	0.0581877489270095	AKT1/FABP5/HMGCR/CSK/LGALS3/NR1H3/ARHGAP1/GSTO1/HADH	9	0.0187891440501044
GO:0006470	BP	GO:0006470	protein dephosphorylation	6/174	261/18903	0.034023051656355	0.0935385939123697	0.0589934760958742	LGALS3/FKBP1A/PPIA/GSK3B/PTPN1/PPP5C	6	0.0229885057471264
GO:0043297	BP	GO:0043297	apical junction assembly	3/174	77/18903	0.0341551732740067	0.0935524904852773	0.0590022404690313	CTNNA1/PRKACA/RHOA	3	0.038961038961039
GO:0045824	BP	GO:0045824	negative regulation of innate immune response	3/174	77/18903	0.0341551732740067	0.0935524904852773	0.0590022404690313	PARP1/NR1H3/MMP12	3	0.038961038961039
GO:0046470	BP	GO:0046470	phosphatidylcholine metabolic process	3/174	77/18903	0.0341551732740067	0.0935524904852773	0.0590022404690313	FABP5/NR1H3/FABP3	3	0.038961038961039
GO:0071357	BP	GO:0071357	cellular response to type I interferon	3/174	77/18903	0.0341551732740067	0.0935524904852773	0.0590022404690313	PTPN1/STAT1/MMP12	3	0.038961038961039
GO:1903036	BP	GO:1903036	positive regulation of response to wounding	3/174	77/18903	0.0341551732740067	0.0935524904852773	0.0590022404690313	IGF1R/PTK2/PLAU	3	0.038961038961039
GO:0045786	BP	GO:0045786	negative regulation of cell cycle	8/174	405/18903	0.0341769172557561	0.0935524904852773	0.0590022404690313	KAT2B/DOT1L/ABL1/MDM2/CDK6/CASP3/CDK2/MAPK14	8	0.0197530864197531
GO:1904950	BP	GO:1904950	negative regulation of establishment of protein localization	4/174	133/18903	0.0346146805108626	0.0946581752419487	0.0596995802999397	HMGCR/CSK/NR1H3/HADH	4	0.0300751879699248
GO:0060249	BP	GO:0060249	anatomical structure homeostasis	7/174	333/18903	0.0347965695440008	0.0946581752419487	0.0596995802999397	AZGP1/XIAP/CSK/HEXB/SRC/KDR/ALB	7	0.021021021021021
GO:0002862	BP	GO:0002862	negative regulation of inflammatory response to antigenic stimulus	2/174	32/18903	0.0348819892858719	0.0946581752419487	0.0596995802999397	SRC/MAPK14	2	0.0625
GO:0006516	BP	GO:0006516	glycoprotein catabolic process	2/174	32/18903	0.0348819892858719	0.0946581752419487	0.0596995802999397	MAN1B1/MMP12	2	0.0625
GO:0010743	BP	GO:0010743	regulation of macrophage derived foam cell differentiation	2/174	32/18903	0.0348819892858719	0.0946581752419487	0.0596995802999397	PPARA/NR1H3	2	0.0625
GO:0019082	BP	GO:0019082	viral protein processing	2/174	32/18903	0.0348819892858719	0.0946581752419487	0.0596995802999397	GSK3B/MAN1B1	2	0.0625
GO:0030149	BP	GO:0030149	sphingolipid catabolic process	2/174	32/18903	0.0348819892858719	0.0946581752419487	0.0596995802999397	HEXB/GM2A	2	0.0625
GO:0045070	BP	GO:0045070	positive regulation of viral genome replication	2/174	32/18903	0.0348819892858719	0.0946581752419487	0.0596995802999397	PPIA/PPARA	2	0.0625
GO:0046685	BP	GO:0046685	response to arsenic-containing substance	2/174	32/18903	0.0348819892858719	0.0946581752419487	0.0596995802999397	ALAD/GSTO1	2	0.0625
GO:0046825	BP	GO:0046825	regulation of protein export from nucleus	2/174	32/18903	0.0348819892858719	0.0946581752419487	0.0596995802999397	GSK3B/PRKACA	2	0.0625
GO:0061384	BP	GO:0061384	heart trabecula morphogenesis	2/174	32/18903	0.0348819892858719	0.0946581752419487	0.0596995802999397	FKBP1A/TGFB2	2	0.0625
GO:1990776	BP	GO:1990776	response to angiotensin	2/174	32/18903	0.0348819892858719	0.0946581752419487	0.0596995802999397	IGF1R/SRC	2	0.0625
GO:0007369	BP	GO:0007369	gastrulation	5/174	196/18903	0.0351488913060965	0.0953138878552091	0.0601131290262802	MAP2K1/GRB2/PRKACA/MMP8/FGFR2	5	0.0255102040816327
GO:0009064	BP	GO:0009064	glutamine family amino acid metabolic process	3/174	78/18903	0.0352882257420644	0.0954857873020566	0.0602215435906256	ARG2/NR1H4/OAT	3	0.0384615384615385
GO:0070373	BP	GO:0070373	negative regulation of ERK1 and ERK2 cascade	3/174	78/18903	0.0352882257420644	0.0954857873020566	0.0602215435906256	CSK/ABL1/PTPN1	3	0.0384615384615385
GO:0090049	BP	GO:0090049	regulation of cell migration involved in sprouting angiogenesis	3/174	78/18903	0.0352882257420644	0.0954857873020566	0.0602215435906256	ABL1/RHOA/KDR	3	0.0384615384615385
GO:0042692	BP	GO:0042692	muscle cell differentiation	8/174	409/18903	0.0358945374636844	0.0970567708337042	0.061212340817149	AKT1/ACADM/MDM2/PPARA/RARB/CASP3/FGFR2/MAPK14	8	0.019559902200489
GO:0002437	BP	GO:0002437	inflammatory response to antigenic stimulus	3/174	79/18903	0.0364405322617076	0.0984625269993991	0.0620989314669426	AHCY/SRC/MAPK14	3	0.0379746835443038
GO:0002695	BP	GO:0002695	negative regulation of leukocyte activation	5/174	198/18903	0.036470902007812	0.0984740460797901	0.0621061963889953	ARG2/LGALS3/CASP3/NR1H3/CTSG	5	0.0252525252525253
GO:0045684	BP	GO:0045684	positive regulation of epidermis development	2/174	33/18903	0.0369121603905666	0.0990979850485533	0.0624997059244657	SULT2B1/PPARD	2	0.0606060606060606
GO:0045736	BP	GO:0045736	negative regulation of cyclin-dependent protein serine/threonine kinase activity	2/174	33/18903	0.0369121603905666	0.0990979850485533	0.0624997059244657	KAT2B/CASP3	2	0.0606060606060606
GO:0050974	BP	GO:0050974	detection of mechanical stimulus involved in sensory perception	2/174	33/18903	0.0369121603905666	0.0990979850485533	0.0624997059244657	HPN/BACE1	2	0.0606060606060606
GO:0051204	BP	GO:0051204	protein insertion into mitochondrial membrane	2/174	33/18903	0.0369121603905666	0.0990979850485533	0.0624997059244657	MAPK8/HSP90AA1	2	0.0606060606060606
GO:0060351	BP	GO:0060351	cartilage development involved in endochondral bone morphogenesis	2/174	33/18903	0.0369121603905666	0.0990979850485533	0.0624997059244657	CBS/RARB	2	0.0606060606060606
GO:0071353	BP	GO:0071353	cellular response to interleukin-4	2/174	33/18903	0.0369121603905666	0.0990979850485533	0.0624997059244657	ALAD/IMPDH2	2	0.0606060606060606
GO:1902253	BP	GO:1902253	regulation of intrinsic apoptotic signaling pathway by p53 class mediator	2/174	33/18903	0.0369121603905666	0.0990979850485533	0.0624997059244657	MIF/MDM2	2	0.0606060606060606
GO:1904030	BP	GO:1904030	negative regulation of cyclin-dependent protein kinase activity	2/174	33/18903	0.0369121603905666	0.0990979850485533	0.0624997059244657	KAT2B/CASP3	2	0.0606060606060606
GO:0071333	BP	GO:0071333	cellular response to glucose stimulus	4/174	136/18903	0.0371022637511395	0.0994667653655283	0.0627322904855986	IGF1R/NR1H4/PRKACA/PPARD	4	0.0294117647058824
GO:1903052	BP	GO:1903052	positive regulation of proteolysis involved in protein catabolic process	4/174	136/18903	0.0371022637511395	0.0994667653655283	0.0627322904855986	AKT1/MDM2/GSK3B/PTK2	4	0.0294117647058824
GO:0032388	BP	GO:0032388	positive regulation of intracellular transport	5/174	199/18903	0.0371432643170734	0.0995059609403416	0.062757010583572	MAPK8/GSK3B/PRKACA/HSP90AA1/MAPK14	5	0.0251256281407035
GO:0001933	BP	GO:0001933	negative regulation of protein phosphorylation	7/174	338/18903	0.0372417909481673	0.0996991025241214	0.0628788222650317	AKT1/HMGCR/KAT2B/ABL1/PPIA/PTPN1/CASP3	7	0.0207100591715976
GO:0003151	BP	GO:0003151	outflow tract morphogenesis	3/174	80/18903	0.0376120292090707	0.100476327320549	0.0633690070169224	CDC42/FGFR2/TGFB2	3	0.0375
GO:0042440	BP	GO:0042440	pigment metabolic process	3/174	80/18903	0.0376120292090707	0.100476327320549	0.0633690070169224	BLVRB/FECH/ALAD	3	0.0375
GO:0048644	BP	GO:0048644	muscle organ morphogenesis	3/174	80/18903	0.0376120292090707	0.100476327320549	0.0633690070169224	FKBP1A/FGFR2/TGFB2	3	0.0375
GO:0034101	BP	GO:0034101	erythrocyte homeostasis	4/174	137/18903	0.0379537902396843	0.101317549033326	0.063899553724205	CDK6/STAT1/CASP3/MAPK14	4	0.0291970802919708
GO:0060491	BP	GO:0060491	regulation of cell projection assembly	5/174	201/18903	0.0385107807114376	0.102731729026551	0.064791457163589	CDC42/RAB5A/GSK3B/SRC/HSP90AA1	5	0.0248756218905473
GO:0033555	BP	GO:0033555	multicellular organismal response to stress	3/174	81/18903	0.0388026490351816	0.10290958619015	0.0649036291761286	DPP4/AKT1/EIF4E	3	0.037037037037037
GO:0097061	BP	GO:0097061	dendritic spine organization	3/174	81/18903	0.0388026490351816	0.10290958619015	0.0649036291761286	CDC42/INSR/IGF1R	3	0.037037037037037
GO:0071331	BP	GO:0071331	cellular response to hexose stimulus	4/174	138/18903	0.0388164941300139	0.10290958619015	0.0649036291761286	IGF1R/NR1H4/PRKACA/PPARD	4	0.0289855072463768
GO:0003382	BP	GO:0003382	epithelial cell morphogenesis	2/174	34/18903	0.0389866910566608	0.10290958619015	0.0649036291761286	ST14/AR	2	0.0588235294117647
GO:0006536	BP	GO:0006536	glutamate metabolic process	2/174	34/18903	0.0389866910566608	0.10290958619015	0.0649036291761286	NR1H4/OAT	2	0.0588235294117647
GO:0010984	BP	GO:0010984	regulation of lipoprotein particle clearance	2/174	34/18903	0.0389866910566608	0.10290958619015	0.0649036291761286	CSK/NR1H4	2	0.0588235294117647
GO:0033238	BP	GO:0033238	regulation of cellular amine metabolic process	2/174	34/18903	0.0389866910566608	0.10290958619015	0.0649036291761286	NR1H4/ALDH2	2	0.0588235294117647
GO:0034383	BP	GO:0034383	low-density lipoprotein particle clearance	2/174	34/18903	0.0389866910566608	0.10290958619015	0.0649036291761286	CSK/NR1H4	2	0.0588235294117647
GO:0034405	BP	GO:0034405	response to fluid shear stress	2/174	34/18903	0.0389866910566608	0.10290958619015	0.0649036291761286	AKT1/SRC	2	0.0588235294117647
GO:0045648	BP	GO:0045648	positive regulation of erythrocyte differentiation	2/174	34/18903	0.0389866910566608	0.10290958619015	0.0649036291761286	STAT1/MAPK14	2	0.0588235294117647
GO:0051973	BP	GO:0051973	positive regulation of telomerase activity	2/174	34/18903	0.0389866910566608	0.10290958619015	0.0649036291761286	MAPK1/HSP90AA1	2	0.0588235294117647
GO:0090162	BP	GO:0090162	establishment of epithelial cell polarity	2/174	34/18903	0.0389866910566608	0.10290958619015	0.0649036291761286	CDC42/RHOA	2	0.0588235294117647
GO:1900181	BP	GO:1900181	negative regulation of protein localization to nucleus	2/174	34/18903	0.0389866910566608	0.10290958619015	0.0649036291761286	CTNNA1/GSK3B	2	0.0588235294117647
GO:1901797	BP	GO:1901797	negative regulation of signal transduction by p53 class mediator	2/174	34/18903	0.0389866910566608	0.10290958619015	0.0649036291761286	MIF/MDM2	2	0.0588235294117647
GO:1905207	BP	GO:1905207	regulation of cardiocyte differentiation	2/174	34/18903	0.0389866910566608	0.10290958619015	0.0649036291761286	TGFB2/EGFR	2	0.0588235294117647
GO:0010770	BP	GO:0010770	positive regulation of cell morphogenesis involved in differentiation	3/174	82/18903	0.0400123203735431	0.105469233018172	0.0665179624437878	CDC42/ABL1/FGG	3	0.0365853658536585
GO:1902117	BP	GO:1902117	positive regulation of organelle assembly	3/174	82/18903	0.0400123203735431	0.105469233018172	0.0665179624437878	GSK3B/RHOA/SRC	3	0.0365853658536585
GO:0090596	BP	GO:0090596	sensory organ morphogenesis	6/174	272/18903	0.040297588464718	0.106146999782763	0.0669454204133069	HPN/THRB/MAPK1/RARB/FGFR2/KDR	6	0.0220588235294118
GO:0060048	BP	GO:0060048	cardiac muscle contraction	4/174	140/18903	0.0405754506801006	0.106729846558814	0.0673130136805603	PDE4B/PRKACA/GSTO1/HSP90AA1	4	0.0285714285714286
GO:0071326	BP	GO:0071326	cellular response to monosaccharide stimulus	4/174	140/18903	0.0405754506801006	0.106729846558814	0.0673130136805603	IGF1R/NR1H4/PRKACA/PPARD	4	0.0285714285714286
GO:0006779	BP	GO:0006779	porphyrin-containing compound biosynthetic process	2/174	35/18903	0.0411046029040145	0.107209463711936	0.0676155014759654	FECH/ALAD	2	0.0571428571428571
GO:0010737	BP	GO:0010737	protein kinase A signaling	2/174	35/18903	0.0411046029040145	0.107209463711936	0.0676155014759654	MIF/PRKACA	2	0.0571428571428571
GO:0014808	BP	GO:0014808	release of sequestered calcium ion into cytosol by sarcoplasmic reticulum	2/174	35/18903	0.0411046029040145	0.107209463711936	0.0676155014759654	PRKACA/GSTO1	2	0.0571428571428571
GO:0032205	BP	GO:0032205	negative regulation of telomere maintenance	2/174	35/18903	0.0411046029040145	0.107209463711936	0.0676155014759654	PARP1/SRC	2	0.0571428571428571
GO:0033014	BP	GO:0033014	tetrapyrrole biosynthetic process	2/174	35/18903	0.0411046029040145	0.107209463711936	0.0676155014759654	FECH/ALAD	2	0.0571428571428571
GO:0048730	BP	GO:0048730	epidermis morphogenesis	2/174	35/18903	0.0411046029040145	0.107209463711936	0.0676155014759654	FGFR2/TGFB2	2	0.0571428571428571
GO:0060218	BP	GO:0060218	hematopoietic stem cell differentiation	2/174	35/18903	0.0411046029040145	0.107209463711936	0.0676155014759654	ABL1/CDK6	2	0.0571428571428571
GO:0090050	BP	GO:0090050	positive regulation of cell migration involved in sprouting angiogenesis	2/174	35/18903	0.0411046029040145	0.107209463711936	0.0676155014759654	ABL1/KDR	2	0.0571428571428571
GO:1901099	BP	GO:1901099	negative regulation of signal transduction in absence of ligand	2/174	35/18903	0.0411046029040145	0.107209463711936	0.0676155014759654	AKT1/CTNNA1	2	0.0571428571428571
GO:1901658	BP	GO:1901658	glycosyl compound catabolic process	2/174	35/18903	0.0411046029040145	0.107209463711936	0.0676155014759654	AHCY/PNP	2	0.0571428571428571
GO:2000406	BP	GO:2000406	positive regulation of T cell migration	2/174	35/18903	0.0411046029040145	0.107209463711936	0.0676155014759654	ABL1/RHOA	2	0.0571428571428571
GO:2001240	BP	GO:2001240	negative regulation of extrinsic apoptotic signaling pathway in absence of ligand	2/174	35/18903	0.0411046029040145	0.107209463711936	0.0676155014759654	AKT1/CTNNA1	2	0.0571428571428571
GO:0007492	BP	GO:0007492	endoderm development	3/174	83/18903	0.0412409681458162	0.107209463711936	0.0676155014759654	MAP2K1/GRB2/MMP8	3	0.036144578313253
GO:0014032	BP	GO:0014032	neural crest cell development	3/174	83/18903	0.0412409681458162	0.107209463711936	0.0676155014759654	CDC42/MAPK1/ERBB4	3	0.036144578313253
GO:0034340	BP	GO:0034340	response to type I interferon	3/174	83/18903	0.0412409681458162	0.107209463711936	0.0676155014759654	PTPN1/STAT1/MMP12	3	0.036144578313253
GO:0042310	BP	GO:0042310	vasoconstriction	3/174	83/18903	0.0412409681458162	0.107209463711936	0.0676155014759654	ABL1/RHOA/FGG	3	0.036144578313253
GO:0050848	BP	GO:0050848	regulation of calcium-mediated signaling	3/174	83/18903	0.0412409681458162	0.107209463711936	0.0676155014759654	GSK3B/HINT1/PDK2	3	0.036144578313253
GO:0046328	BP	GO:0046328	regulation of JNK cascade	4/174	141/18903	0.0414717078476061	0.10773504270053	0.0679469767548135	XIAP/IGF1R/MMP8/EGFR	4	0.0283687943262411
GO:0061448	BP	GO:0061448	connective tissue development	6/174	274/18903	0.0415121394269337	0.107765856791737	0.0679664107689138	CBS/ACAT1/NR1H4/RARB/PPARD/MAPK14	6	0.0218978102189781
GO:0001894	BP	GO:0001894	tissue homeostasis	6/174	275/18903	0.0421280132679155	0.109289453952254	0.068927322077383	AZGP1/XIAP/CSK/SRC/KDR/ALB	6	0.0218181818181818
GO:0010959	BP	GO:0010959	regulation of metal ion transport	8/174	423/18903	0.0423642051997251	0.109771694210125	0.0692314642280746	AKT1/PDE4B/ABL1/LGALS3/FKBP1A/PRKACA/RHOA/GSTO1	8	0.0189125295508274
GO:0038061	BP	GO:0038061	NIK/NF-kappaB signaling	4/174	142/18903	0.0423791514583484	0.109771694210125	0.0692314642280746	AKT1/MMP8/RHOA/EGFR	4	0.028169014084507
GO:0008589	BP	GO:0008589	regulation of smoothened signaling pathway	3/174	84/18903	0.0424885136656369	0.109771694210125	0.0692314642280746	CTNNA1/PRKACA/FGFR2	3	0.0357142857142857
GO:0031397	BP	GO:0031397	negative regulation of protein ubiquitination	3/174	84/18903	0.0424885136656369	0.109771694210125	0.0692314642280746	AKT1/ABL1/PPIA	3	0.0357142857142857
GO:0097006	BP	GO:0097006	regulation of plasma lipoprotein particle levels	3/174	84/18903	0.0424885136656369	0.109771694210125	0.0692314642280746	CSK/NR1H4/PRKACA	3	0.0357142857142857
GO:0097194	BP	GO:0097194	execution phase of apoptosis	3/174	84/18903	0.0424885136656369	0.109771694210125	0.0692314642280746	AKT1/CASP7/CASP3	3	0.0357142857142857
GO:0048167	BP	GO:0048167	regulation of synaptic plasticity	5/174	207/18903	0.0427966480222912	0.110416522804434	0.0696381485566837	MME/ABL1/RAB5A/MAPK1/GSK3B	5	0.0241545893719807
GO:1902115	BP	GO:1902115	regulation of organelle assembly	5/174	207/18903	0.0427966480222912	0.110416522804434	0.0696381485566837	KAT2B/RAB5A/GSK3B/RHOA/SRC	5	0.0241545893719807
GO:0001569	BP	GO:0001569	branching involved in blood vessel morphogenesis	2/174	36/18903	0.0432649316218473	0.110800017877195	0.0698800135074122	ABL1/KDR	2	0.0555555555555556
GO:0016486	BP	GO:0016486	peptide hormone processing	2/174	36/18903	0.0432649316218473	0.110800017877195	0.0698800135074122	DPP4/CTSG	2	0.0555555555555556
GO:0030224	BP	GO:0030224	monocyte differentiation	2/174	36/18903	0.0432649316218473	0.110800017877195	0.0698800135074122	CDK6/APCS	2	0.0555555555555556
GO:0043243	BP	GO:0043243	positive regulation of protein-containing complex disassembly	2/174	36/18903	0.0432649316218473	0.110800017877195	0.0698800135074122	INSR/IGF1R	2	0.0555555555555556
GO:0045777	BP	GO:0045777	positive regulation of blood pressure	2/174	36/18903	0.0432649316218473	0.110800017877195	0.0698800135074122	ADH5/RHOA	2	0.0555555555555556
GO:0070670	BP	GO:0070670	response to interleukin-4	2/174	36/18903	0.0432649316218473	0.110800017877195	0.0698800135074122	ALAD/IMPDH2	2	0.0555555555555556
GO:0097345	BP	GO:0097345	mitochondrial outer membrane permeabilization	2/174	36/18903	0.0432649316218473	0.110800017877195	0.0698800135074122	MAPK8/GSK3B	2	0.0555555555555556
GO:1903514	BP	GO:1903514	release of sequestered calcium ion into cytosol by endoplasmic reticulum	2/174	36/18903	0.0432649316218473	0.110800017877195	0.0698800135074122	PRKACA/GSTO1	2	0.0555555555555556
GO:1903580	BP	GO:1903580	positive regulation of ATP metabolic process	2/174	36/18903	0.0432649316218473	0.110800017877195	0.0698800135074122	INSR/PPARA	2	0.0555555555555556
GO:1905332	BP	GO:1905332	positive regulation of morphogenesis of an epithelium	2/174	36/18903	0.0432649316218473	0.110800017877195	0.0698800135074122	ABL1/AR	2	0.0555555555555556
GO:0033135	BP	GO:0033135	regulation of peptidyl-serine phosphorylation	4/174	143/18903	0.0432977800506324	0.110800017877195	0.0698800135074122	AKT1/MIF/EGFR/HSP90AA1	4	0.027972027972028
GO:0046165	BP	GO:0046165	alcohol biosynthetic process	4/174	143/18903	0.0432977800506324	0.110800017877195	0.0698800135074122	HMGCR/FDPS/IMPA1/SEC14L2	4	0.027972027972028
GO:0008625	BP	GO:0008625	extrinsic apoptotic signaling pathway via death domain receptors	3/174	85/18903	0.0437548747405908	0.11189382204848	0.0705698604201501	LGALS3/GSK3B/FGG	3	0.0352941176470588
GO:0050921	BP	GO:0050921	positive regulation of chemotaxis	4/174	144/18903	0.0442275907005221	0.113026065123556	0.0712839502090857	MAPK1/PTK2/PGF/KDR	4	0.0277777777777778
GO:0045732	BP	GO:0045732	positive regulation of protein catabolic process	5/174	209/18903	0.0442866902473583	0.113100470963463	0.0713308769262229	AKT1/CSNK2A1/MDM2/GSK3B/HSP90AA1	5	0.0239234449760766
GO:0031346	BP	GO:0031346	positive regulation of cell projection organization	7/174	352/18903	0.0446832836640141	0.114036093356334	0.0719209608152353	MAP2K1/CDC42/IGF1R/ABL1/GSK3B/SRC/HSP90AA1	7	0.0198863636363636
GO:0006970	BP	GO:0006970	response to osmotic stress	3/174	86/18903	0.0450399657723744	0.114791047900943	0.0723971000324083	SORD/CASP3/HSP90AA1	3	0.0348837209302326
GO:0032092	BP	GO:0032092	positive regulation of protein binding	3/174	86/18903	0.0450399657723744	0.114791047900943	0.0723971000324083	ABL1/FKBP1A/GSK3B	3	0.0348837209302326
GO:0031331	BP	GO:0031331	positive regulation of cellular catabolic process	8/174	429/18903	0.0453597626867087	0.114946711441746	0.0724952748390762	AKT1/INSR/MDM2/GSK3B/PTPN1/PPARA/PTK2/KDR	8	0.0186480186480186
GO:0001662	BP	GO:0001662	behavioral fear response	2/174	37/18903	0.0454667267950914	0.114946711441746	0.0724952748390762	DPP4/EIF4E	2	0.0540540540540541
GO:0006471	BP	GO:0006471	protein ADP-ribosylation	2/174	37/18903	0.0454667267950914	0.114946711441746	0.0724952748390762	KAT2B/PARP1	2	0.0540540540540541
GO:0010092	BP	GO:0010092	specification of animal organ identity	2/174	37/18903	0.0454667267950914	0.114946711441746	0.0724952748390762	FGFR2/AR	2	0.0540540540540541
GO:0034110	BP	GO:0034110	regulation of homotypic cell-cell adhesion	2/174	37/18903	0.0454667267950914	0.114946711441746	0.0724952748390762	FGG/CTSG	2	0.0540540540540541
GO:0038179	BP	GO:0038179	neurotrophin signaling pathway	2/174	37/18903	0.0454667267950914	0.114946711441746	0.0724952748390762	CASP3/SRC	2	0.0540540540540541
GO:0044319	BP	GO:0044319	wound healing, spreading of cells	2/174	37/18903	0.0454667267950914	0.114946711441746	0.0724952748390762	RHOA/MMP12	2	0.0540540540540541
GO:0046466	BP	GO:0046466	membrane lipid catabolic process	2/174	37/18903	0.0454667267950914	0.114946711441746	0.0724952748390762	HEXB/GM2A	2	0.0540540540540541
GO:0070229	BP	GO:0070229	negative regulation of lymphocyte apoptotic process	2/174	37/18903	0.0454667267950914	0.114946711441746	0.0724952748390762	ARG2/MIF	2	0.0540540540540541
GO:0090151	BP	GO:0090151	establishment of protein localization to mitochondrial membrane	2/174	37/18903	0.0454667267950914	0.114946711441746	0.0724952748390762	MAPK8/HSP90AA1	2	0.0540540540540541
GO:0090505	BP	GO:0090505	epiboly involved in wound healing	2/174	37/18903	0.0454667267950914	0.114946711441746	0.0724952748390762	RHOA/MMP12	2	0.0540540540540541
GO:1903725	BP	GO:1903725	regulation of phospholipid metabolic process	2/174	37/18903	0.0454667267950914	0.114946711441746	0.0724952748390762	NR1H4/FABP3	2	0.0540540540540541
GO:0001523	BP	GO:0001523	retinoid metabolic process	3/174	87/18903	0.0463436978551687	0.116928714588426	0.0737452963581631	ADH5/AKR1C3/PPARD	3	0.0344827586206897
GO:0045069	BP	GO:0045069	regulation of viral genome replication	3/174	87/18903	0.0463436978551687	0.116928714588426	0.0737452963581631	PPIA/ISG20/PPARA	3	0.0344827586206897
GO:2000243	BP	GO:2000243	positive regulation of reproductive process	3/174	87/18903	0.0463436978551687	0.116928714588426	0.0737452963581631	INSR/SRC/AR	3	0.0344827586206897
GO:0072507	BP	GO:0072507	divalent inorganic cation homeostasis	7/174	356/18903	0.0469734681155028	0.118438450355399	0.0746974654806053	ABL1/FKBP1A/HEXB/PRKACA/GP1BA/KDR/GSTO1	7	0.0196629213483146
GO:1902806	BP	GO:1902806	regulation of cell cycle G1/S phase transition	5/174	213/18903	0.0473593536394287	0.119331651254459	0.075260794729887	AKT1/CDK7/MDM2/EGFR/CDK2	5	0.0234741784037559
GO:0002209	BP	GO:0002209	behavioral defense response	2/174	38/18903	0.0477090517327204	0.119653286659456	0.0754636456578585	DPP4/EIF4E	2	0.0526315789473684
GO:0003203	BP	GO:0003203	endocardial cushion morphogenesis	2/174	38/18903	0.0477090517327204	0.119653286659456	0.0754636456578585	MDM2/TGFB2	2	0.0526315789473684
GO:0006298	BP	GO:0006298	mismatch repair	2/174	38/18903	0.0477090517327204	0.119653286659456	0.0754636456578585	ABL1/PMS2	2	0.0526315789473684
GO:0007617	BP	GO:0007617	mating behavior	2/174	38/18903	0.0477090517327204	0.119653286659456	0.0754636456578585	THRB/HEXB	2	0.0526315789473684
GO:0032094	BP	GO:0032094	response to food	2/174	38/18903	0.0477090517327204	0.119653286659456	0.0754636456578585	AKT1/PPARA	2	0.0526315789473684
GO:0043516	BP	GO:0043516	regulation of DNA damage response, signal transduction by p53 class mediator	2/174	38/18903	0.0477090517327204	0.119653286659456	0.0754636456578585	MIF/MDM2	2	0.0526315789473684
GO:0090504	BP	GO:0090504	epiboly	2/174	38/18903	0.0477090517327204	0.119653286659456	0.0754636456578585	RHOA/MMP12	2	0.0526315789473684
GO:0006874	BP	GO:0006874	cellular calcium ion homeostasis	6/174	284/18903	0.0479308023456928	0.12012955910163	0.0757640239910934	ABL1/FKBP1A/HEXB/PRKACA/GP1BA/GSTO1	6	0.0211267605633803
GO:0072659	BP	GO:0072659	protein localization to plasma membrane	6/174	285/18903	0.04860461621712	0.121737458413663	0.0767781034812967	AKT1/RAB11A/CSK/LGALS3/EGFR/AR	6	0.0210526315789474
GO:0048864	BP	GO:0048864	stem cell development	3/174	89/18903	0.0490067135908762	0.122581779618558	0.0773106049946811	CDC42/MAPK1/ERBB4	3	0.0337078651685393
GO:0050829	BP	GO:0050829	defense response to Gram-negative bacterium	3/174	89/18903	0.0490067135908762	0.122581779618558	0.0773106049946811	SELP/CTSG/RNASE3	3	0.0337078651685393
GO:0001990	BP	GO:0001990	regulation of systemic arterial blood pressure by hormone	2/174	39/18903	0.0499909832980326	0.124590363259612	0.0785773904578676	RHOA/CTSG	2	0.0512820512820513
GO:0008210	BP	GO:0008210	estrogen metabolic process	2/174	39/18903	0.0499909832980326	0.124590363259612	0.0785773904578676	CYP2C9/HSD17B1	2	0.0512820512820513
GO:0032373	BP	GO:0032373	positive regulation of sterol transport	2/174	39/18903	0.0499909832980326	0.124590363259612	0.0785773904578676	RXRA/NR1H3	2	0.0512820512820513
GO:0032376	BP	GO:0032376	positive regulation of cholesterol transport	2/174	39/18903	0.0499909832980326	0.124590363259612	0.0785773904578676	RXRA/NR1H3	2	0.0512820512820513
GO:0031983	CC	GO:0031983	vesicle lumen	24/175	327/19869	1.49837401930289e-15	4.62997571964594e-13	3.91154480828545e-13	FABP5/MIF/APRT/ALAD/PPIA/MAPK1/HEXB/IMPDH2/HSPA8/IMPDH1/MMP8/PNP/PYGL/TGFB2/GM2A/BACE1/FGG/EGFR/ALB/CTSG/HSP90AA1/CTSD/RNASE3/MAPK14	24	0.073394495412844
GO:0060205	CC	GO:0060205	cytoplasmic vesicle lumen	23/175	325/19869	1.330641093159e-14	2.05584048893065e-12	1.73683679528122e-12	FABP5/MIF/APRT/ALAD/PPIA/MAPK1/HEXB/IMPDH2/HSPA8/IMPDH1/MMP8/PNP/PYGL/TGFB2/GM2A/BACE1/FGG/ALB/CTSG/HSP90AA1/CTSD/RNASE3/MAPK14	23	0.0707692307692308
GO:0034774	CC	GO:0034774	secretory granule lumen	22/175	322/19869	1.06642205446094e-13	1.09841471609477e-11	9.27974278969522e-12	FABP5/MIF/APRT/ALAD/PPIA/MAPK1/HEXB/IMPDH2/HSPA8/IMPDH1/MMP8/PNP/PYGL/TGFB2/GM2A/FGG/ALB/CTSG/HSP90AA1/CTSD/RNASE3/MAPK14	22	0.0683229813664596
GO:0045121	CC	GO:0045121	membrane raft	18/175	326/19869	6.79096427320304e-10	4.40776618771031e-08	3.72381541322486e-08	DPP4/INSR/HK1/MME/IGF1R/CSK/RAB5A/MAPK1/CTNNA1/PRKACA/CASP3/SELE/SRC/BACE1/KDR/EGFR/CTSD/RTN4R	18	0.0552147239263804
GO:0098857	CC	GO:0098857	membrane microdomain	18/175	327/19869	7.13230774710406e-10	4.40776618771031e-08	3.72381541322486e-08	DPP4/INSR/HK1/MME/IGF1R/CSK/RAB5A/MAPK1/CTNNA1/PRKACA/CASP3/SELE/SRC/BACE1/KDR/EGFR/CTSD/RTN4R	18	0.055045871559633
GO:1904813	CC	GO:1904813	ficolin-1-rich granule lumen	12/175	124/19869	1.01018388883314e-09	4.5634775470884e-08	3.85536512239115e-08	MIF/ALAD/PPIA/MAPK1/IMPDH2/HSPA8/IMPDH1/PNP/PYGL/HSP90AA1/CTSD/MAPK14	12	0.0967741935483871
GO:0101002	CC	GO:0101002	ficolin-1-rich granule	14/175	185/19869	1.03379750257666e-09	4.5634775470884e-08	3.85536512239115e-08	MIF/ALAD/LGALS3/PPIA/MAPK1/IMPDH2/HSPA8/IMPDH1/PNP/PYGL/RHOA/HSP90AA1/CTSD/MAPK14	14	0.0756756756756757
GO:0005759	CC	GO:0005759	mitochondrial matrix	18/175	483/19869	2.85726896882826e-07	1.10362013920991e-05	9.32371979301853e-06	ARG2/BCAT2/GSTZ1/FECH/ACAT1/HAGH/CLPP/ACADM/ME2/PDK1/GSR/PTPN1/ERBB4/ALDH2/PDK2/OAT/GCDH/HADH	18	0.0372670807453416
GO:1902911	CC	GO:1902911	protein kinase complex	9/175	136/19869	3.33289061163717e-06	0.000114429244332876	9.66733183258501e-05	INSR/CDK7/IGF1R/CSNK2A1/CCNA2/PRKACA/CCNT1/CDK6/CDK2	9	0.0661764705882353
GO:0005775	CC	GO:0005775	vacuolar lumen	10/175	176/19869	3.73687107493348e-06	0.000115469316215445	9.75520027982636e-05	FABP5/MAPK1/HEXB/HSPA8/IMPDH1/GM2A/CTSG/HSP90AA1/CTSD/RNASE3	10	0.0568181818181818
GO:0035578	CC	GO:0035578	azurophil granule lumen	7/175	91/19869	1.58405441822275e-05	0.000444975286573483	0.000375928704037553	FABP5/MAPK1/HEXB/IMPDH1/GM2A/CTSG/RNASE3	7	0.0769230769230769
GO:0005925	CC	GO:0005925	focal adhesion	14/175	422/19869	2.33973317306963e-05	0.000602481292065428	0.000508994585018655	DPP4/MAP2K1/CDC42/MME/PPIA/MAPK1/CTNNA1/HSPA8/ANXA5/PTK2/RHOA/SRC/EGFR/PLAU	14	0.033175355450237
GO:0030055	CC	GO:0030055	cell-substrate junction	14/175	432/19869	3.02496110333351e-05	0.000719009985330811	0.000607441581883976	DPP4/MAP2K1/CDC42/MME/PPIA/MAPK1/CTNNA1/HSPA8/ANXA5/PTK2/RHOA/SRC/EGFR/PLAU	14	0.0324074074074074
GO:0044853	CC	GO:0044853	plasma membrane raft	7/175	113/19869	6.42689026031484e-05	0.00141850649316949	0.0011983975823745	INSR/IGF1R/MAPK1/CTNNA1/PRKACA/SELE/SRC	7	0.0619469026548673
GO:0000307	CC	GO:0000307	cyclin-dependent protein kinase holoenzyme complex	5/175	50/19869	7.69512396212942e-05	0.00156715740484433	0.00132398240981569	CDK7/CCNA2/CCNT1/CDK6/CDK2	5	0.1
GO:0098562	CC	GO:0098562	cytoplasmic side of membrane	9/175	204/19869	8.42900275376179e-05	0.00156715740484433	0.00132398240981569	AKT1/TNK2/FKBP1A/RAB5A/PTPN1/GM2A/PTK2/RHOA/SRC	9	0.0441176470588235
GO:0005901	CC	GO:0005901	caveola	6/175	82/19869	8.62190158004973e-05	0.00156715740484433	0.00132398240981569	INSR/IGF1R/MAPK1/CTNNA1/SELE/SRC	6	0.0731707317073171
GO:1902554	CC	GO:1902554	serine/threonine protein kinase complex	7/175	122/19869	0.000104324625641862	0.00179090607351863	0.00151301211457204	CDK7/CSNK2A1/CCNA2/PRKACA/CCNT1/CDK6/CDK2	7	0.0573770491803279
GO:0043025	CC	GO:0043025	neuronal cell body	14/175	497/19869	0.000134991939844587	0.00219539523220934	0.00185473690201982	NQO1/CDC42/INSR/HPN/MME/IGF1R/ABL1/RAB5A/CASP3/TGFB2/SRC/BACE1/HSP90AA1/RTN4R	14	0.028169014084507
GO:0005766	CC	GO:0005766	primary lysosome	7/175	155/19869	0.000454326537213816	0.00668509047614615	0.00564776848265796	FABP5/MAPK1/HEXB/IMPDH1/GM2A/CTSG/RNASE3	7	0.0451612903225806
GO:0042582	CC	GO:0042582	azurophil granule	7/175	155/19869	0.000454326537213816	0.00668509047614615	0.00564776848265796	FABP5/MAPK1/HEXB/IMPDH1/GM2A/CTSG/RNASE3	7	0.0451612903225806
GO:0019897	CC	GO:0019897	extrinsic component of plasma membrane	7/175	172/19869	0.000842624893113369	0.0118350496350923	0.00999861117187155	AKT1/ST14/TNK2/CTNNA1/PTK2/RHOA/SRC	7	0.0406976744186047
GO:0061695	CC	GO:0061695	transferase complex, transferring phosphorus-containing groups	9/175	295/19869	0.0012488337606495	0.016777810088726	0.0141744060705298	INSR/CDK7/IGF1R/CSNK2A1/CCNA2/PRKACA/CCNT1/CDK6/CDK2	9	0.0305084745762712
GO:0031252	CC	GO:0031252	cell leading edge	11/175	421/19869	0.00130514989994253	0.0168038049617601	0.0141963673327082	DPP4/AKT1/CDC42/INSR/ABL1/RAB5A/CTNNA1/CDK6/RHOA/SRC/EGFR	11	0.0261282660332542
GO:0062023	CC	GO:0062023	collagen-containing extracellular matrix	11/175	433/19869	0.00163041310200762	0.0201519059408142	0.0170249452335954	AZGP1/LGALS3/MMP8/ANXA5/FGFR2/TGFB2/FGG/APCS/CTSG/HSP90AA1/CTSD	11	0.0254041570438799
GO:0043202	CC	GO:0043202	lysosomal lumen	5/175	98/19869	0.00175654008223428	0.0202725869750725	0.017126900254873	HEXB/HSPA8/GM2A/HSP90AA1/CTSD	5	0.0510204081632653
GO:0072562	CC	GO:0072562	blood microparticle	6/175	145/19869	0.00181585228130132	0.0202725869750725	0.017126900254873	CLIC1/HSPA8/ANXA5/FGG/ALB/APCS	6	0.0413793103448276
GO:0031234	CC	GO:0031234	extrinsic component of cytoplasmic side of plasma membrane	5/175	99/19869	0.00183699817249848	0.0202725869750725	0.017126900254873	AKT1/TNK2/PTK2/RHOA/SRC	5	0.0505050505050505
GO:0098978	CC	GO:0098978	glutamatergic synapse	9/175	324/19869	0.00236663484552093	0.0252169023195161	0.0213040087727474	RAB11A/EIF4E/GSK3B/ERBB4/HSPA8/RHOA/SRC/MAPK14/RTN4R	9	0.0277777777777778
GO:0009897	CC	GO:0009897	external side of plasma membrane	11/175	462/19869	0.0026965139094366	0.027774093267197	0.0234644017382554	AZGP1/INSR/GSR/GP1BA/ANXA5/SELE/SELP/FGG/CD209/KDR/RTN4R	11	0.0238095238095238
GO:0042470	CC	GO:0042470	melanosome	5/175	110/19869	0.00290958125003646	0.0280956439456646	0.0237360575660869	AHCY/RAB5A/HSPA8/HSP90AA1/CTSD	5	0.0454545454545455
GO:0048770	CC	GO:0048770	pigment granule	5/175	110/19869	0.00290958125003646	0.0280956439456646	0.0237360575660869	AHCY/RAB5A/HSPA8/HSP90AA1/CTSD	5	0.0454545454545455
GO:0019908	CC	GO:0019908	nuclear cyclin-dependent protein kinase holoenzyme complex	2/175	10/19869	0.00331352757455889	0.0310266672890515	0.0262122755499396	CDK7/CCNT1	2	0.2
GO:0005770	CC	GO:0005770	late endosome	8/175	288/19869	0.00409001891929626	0.0371710542959571	0.0314032412379403	MAP2K1/RAB11A/INSR/MAPK1/HSPA8/SRC/BACE1/EGFR	8	0.0277777777777778
GO:0009898	CC	GO:0009898	cytoplasmic side of plasma membrane	6/175	173/19869	0.00435853434925131	0.0384796318262473	0.0325087674771226	AKT1/TNK2/GM2A/PTK2/RHOA/SRC	6	0.0346820809248555
GO:0031256	CC	GO:0031256	leading edge membrane	6/175	177/19869	0.00486786879756252	0.0417714889573621	0.0352898288585447	DPP4/CDC42/INSR/RHOA/SRC/EGFR	6	0.0338983050847458
GO:0001726	CC	GO:0001726	ruffle	6/175	178/19869	0.00500176404991067	0.0417714889573621	0.0352898288585447	ABL1/RAB5A/CDK6/RHOA/SRC/EGFR	6	0.0337078651685393
GO:0044292	CC	GO:0044292	dendrite terminus	2/175	13/19869	0.00564462002329591	0.0447227586461137	0.0377831515729389	SRC/HSP90AA1	2	0.153846153846154
GO:0099524	CC	GO:0099524	postsynaptic cytosol	2/175	13/19869	0.00564462002329591	0.0447227586461137	0.0377831515729389	EIF4E/HSPA8	2	0.153846153846154
GO:0098845	CC	GO:0098845	postsynaptic endosome	2/175	14/19869	0.00654745320253845	0.0505790759896095	0.0427307472165667	RAB11A/RAB5A	2	0.142857142857143
GO:0019898	CC	GO:0019898	extrinsic component of membrane	8/175	316/19869	0.00705628593993415	0.0531803013521866	0.0449283417998375	AKT1/ST14/TNK2/FKBP1A/CTNNA1/PTK2/RHOA/SRC	8	0.0253164556962025
GO:0099522	CC	GO:0099522	cytosolic region	2/175	16/19869	0.00853491910330167	0.0616410703754344	0.052076257717962	EIF4E/HSPA8	2	0.125
GO:0031091	CC	GO:0031091	platelet alpha granule	4/175	91/19869	0.00857788357975301	0.0616410703754344	0.052076257717962	TGFB2/SELP/FGG/ALB	4	0.043956043956044
GO:0044214	CC	GO:0044214	spanning component of plasma membrane	2/175	18/19869	0.0107573152249178	0.0755456910113544	0.0638233056406605	ERBB4/EGFR	2	0.111111111111111
GO:0032806	CC	GO:0032806	carboxy-terminal domain protein kinase complex	2/175	19/19869	0.0119538667959726	0.0820832186656787	0.0693464085473967	CDK7/CCNT1	2	0.105263157894737
GO:0031362	CC	GO:0031362	anchored component of external side of plasma membrane	2/175	20/19869	0.0132058857156739	0.0887091018726793	0.0749441569219025	GP1BA/RTN4R	2	0.1
GO:0070820	CC	GO:0070820	tertiary granule	5/175	164/19869	0.0151583755832181	0.0996582564939234	0.084194336945982	LGALS3/MMP8/RHOA/CTSD/PLAU	5	0.0304878048780488
GO:0044295	CC	GO:0044295	axonal growth cone	2/175	23/19869	0.0172842341430235	0.111267257295714	0.0940019751638118	HSP90AA1/RTN4R	2	0.0869565217391304
GO:0005771	CC	GO:0005771	multivesicular body	3/175	63/19869	0.0181293135776099	0.114325671336356	0.096585816697041	RAB11A/BACE1/EGFR	3	0.0476190476190476
GO:0031233	CC	GO:0031233	intrinsic component of external side of plasma membrane	2/175	24/19869	0.0187476801397844	0.115860663263867	0.0978826247298216	GP1BA/RTN4R	2	0.0833333333333333
GO:0043197	CC	GO:0043197	dendritic spine	5/175	175/19869	0.0195076341860803	0.118128028967476	0.0997981644828279	PDE4B/CDC42/PRKACA/PTK2/RHOA	5	0.0285714285714286
GO:0044309	CC	GO:0044309	neuron spine	5/175	176/19869	0.0199395349055472	0.118128028967476	0.0997981644828279	PDE4B/CDC42/PRKACA/PTK2/RHOA	5	0.0284090909090909
GO:0089717	CC	GO:0089717	spanning component of membrane	2/175	25/19869	0.0202614418617354	0.118128028967476	0.0997981644828279	ERBB4/EGFR	2	0.08
GO:0031093	CC	GO:0031093	platelet alpha granule lumen	3/175	67/19869	0.0213218853608017	0.122008566231254	0.103076560808554	TGFB2/FGG/ALB	3	0.0447761194029851
GO:0034704	CC	GO:0034704	calcium channel complex	3/175	69/19869	0.0230261286726326	0.1293649774517	0.109291481546658	PDE4B/FKBP1A/PRKACA	3	0.0434782608695652
GO:0005769	CC	GO:0005769	early endosome	8/175	414/19869	0.0306098395248909	0.16890072166413	0.142692485003251	MAP2K1/MME/RAB5A/MAPK1/PTPN1/BACE1/KDR/EGFR	8	0.0193236714975845
GO:0030139	CC	GO:0030139	endocytic vesicle	7/175	343/19869	0.032589225082828	0.176667904396383	0.149254438052472	DPP4/RAB11A/CDC42/RAB5A/MDM2/EGFR/HSP90AA1	7	0.0204081632653061
GO:0150034	CC	GO:0150034	distal axon	6/175	278/19869	0.0368312515977106	0.1907067003023	0.161114841338683	ABL1/RAB5A/HSPA8/SRC/HSP90AA1/RTN4R	6	0.0215827338129496
GO:0005777	CC	GO:0005777	peroxisome	4/175	142/19869	0.037030427243165	0.1907067003023	0.161114841338683	EPHX2/HMGCR/CRAT/IMPDH2	4	0.028169014084507
GO:0042579	CC	GO:0042579	microbody	4/175	142/19869	0.037030427243165	0.1907067003023	0.161114841338683	EPHX2/HMGCR/CRAT/IMPDH2	4	0.028169014084507
GO:0010494	CC	GO:0010494	cytoplasmic stress granule	3/175	84/19869	0.038091683170508	0.192956231142409	0.163015313654633	EIF4E/DDX6/CTSG	3	0.0357142857142857
GO:0004713	MF	GO:0004713	protein tyrosine kinase activity	14/175	138/18432	5.4321550104094e-11	2.99311741073558e-08	2.0356286144271e-08	MAP2K1/INSR/IGF1R/TNK2/CSK/ABL1/ERBB4/CLK1/FGFR2/PTK2/SRC/EPHB4/KDR/EGFR	14	0.101449275362319
GO:0033293	MF	GO:0033293	monocarboxylic acid binding	10/175	81/18432	4.82875647951434e-09	1.3303224101062e-06	9.04756477214267e-07	FABP5/ADH5/PITPNA/NR1H4/RXRA/AKR1C3/PYGL/PPARD/FABP3/ALB	10	0.123456790123457
GO:0031406	MF	GO:0031406	carboxylic acid binding	13/175	171/18432	9.53079298111478e-09	1.75048897753142e-06	1.19051308816732e-06	FABP5/ADH5/PITPNA/NR1H4/RXRA/AKR1C3/PYGL/SELE/PPARD/SELP/FABP3/ALB/RTN4R	13	0.0760233918128655
GO:0004879	MF	GO:0004879	nuclear receptor activity	8/175	52/18432	2.96488561335015e-08	3.26730394591187e-06	2.22210374390033e-06	THRB/NR1H4/RXRA/PPARA/RARB/NR1H3/PPARD/AR	8	0.153846153846154
GO:0098531	MF	GO:0098531	ligand-activated transcription factor activity	8/175	52/18432	2.96488561335015e-08	3.26730394591187e-06	2.22210374390033e-06	THRB/NR1H4/RXRA/PPARA/RARB/NR1H3/PPARD/AR	8	0.153846153846154
GO:0004712	MF	GO:0004712	protein serine/threonine/tyrosine kinase activity	7/175	45/18432	2.06465746689627e-07	1.89604377376641e-05	1.2895053652896e-05	AKT1/MAP2K1/TNK2/MAPK1/PRKACA/CLK1/MAPK14	7	0.155555555555556
GO:0016616	MF	GO:0016616	oxidoreductase activity, acting on the CH-OH group of donors, NAD or NADP as acceptor	10/175	126/18432	3.43083566828685e-07	2.51246426980493e-05	1.70873489359166e-05	SORD/HMGCR/ADH5/CBR1/ME2/IMPDH2/IMPDH1/AKR1C3/HSD17B1/HADH	10	0.0793650793650794
GO:0019902	MF	GO:0019902	phosphatase binding	12/175	195/18432	3.64786100879119e-07	2.51246426980493e-05	1.70873489359166e-05	CSK/LGALS3/MAPK8/MAPK1/GRB2/PTPN1/PPARA/STAT1/PTK2/EGFR/HSP90AA1/MAPK14	12	0.0615384615384615
GO:0016614	MF	GO:0016614	oxidoreductase activity, acting on CH-OH group of donors	10/175	138/18432	7.98321630997568e-07	4.887502429774e-05	3.32400585538169e-05	SORD/HMGCR/ADH5/CBR1/ME2/IMPDH2/IMPDH1/AKR1C3/HSD17B1/HADH	10	0.072463768115942
GO:0004714	MF	GO:0004714	transmembrane receptor protein tyrosine kinase activity	7/175	60/18432	1.55891767378799e-06	8.07279237756205e-05	5.49033161985307e-05	INSR/IGF1R/ERBB4/FGFR2/EPHB4/KDR/EGFR	7	0.116666666666667
GO:0019903	MF	GO:0019903	protein phosphatase binding	10/175	149/18432	1.61162824234451e-06	8.07279237756205e-05	5.49033161985307e-05	CSK/LGALS3/MAPK8/GRB2/PTPN1/STAT1/PTK2/EGFR/HSP90AA1/MAPK14	10	0.0671140939597315
GO:0106310	MF	GO:0106310	protein serine kinase activity	15/175	363/18432	2.05114580335694e-06	9.41817781374728e-05	6.40533250872869e-05	AKT1/MAP2K1/CDK7/TNK2/CSNK2A1/MAPK8/MAPK1/PAK6/GSK3B/PRKACA/CLK1/CDK6/CSNK1G2/CDK2/MAPK14	15	0.0413223140495868
GO:0016661	MF	GO:0016661	oxidoreductase activity, acting on other nitrogenous compounds as donors	4/175	11/18432	2.4597644820187e-06	0.0001042561715071	7.09049518703365e-05	CBS/ALDH2/GMPR2/NQO2	4	0.363636363636364
GO:0016829	MF	GO:0016829	lyase activity	11/175	199/18432	3.23486833885198e-06	0.000127315175336246	8.65874532805492e-05	GLO1/AMD1/FECH/CBS/ALAD/CA12/UMPS/ME2/PPCDC/TPI1/SDS	11	0.0552763819095477
GO:0004674	MF	GO:0004674	protein serine/threonine kinase activity	16/175	430/18432	3.58766241055682e-06	0.000131786799214454	8.96286188181212e-05	AKT1/MAP2K1/CDK7/TNK2/CSNK2A1/MAPK8/MAPK1/PAK6/GSK3B/PRKACA/CLK1/CDK6/CSNK1G2/EGFR/CDK2/MAPK14	16	0.0372093023255814
GO:0004715	MF	GO:0004715	non-membrane spanning protein tyrosine kinase activity	6/175	45/18432	4.02761116252337e-06	0.000138700859409398	9.43308930169947e-05	TNK2/CSK/ABL1/CLK1/PTK2/SRC	6	0.133333333333333
GO:0005504	MF	GO:0005504	fatty acid binding	6/175	49/18432	6.70095626833463e-06	0.00021718981787367	0.000147711481828305	FABP5/ADH5/PITPNA/PPARD/FABP3/ALB	6	0.122448979591837
GO:0033218	MF	GO:0033218	amide binding	15/175	408/18432	8.45255970251782e-06	0.000258742244227073	0.000175971418368207	FOLH1/INSR/PITPNA/MME/IGF1R/FKBP1A/PPIA/FKBP3/RXRA/NQO2/TGFB2/BACE1/CD209/GCDH/RTN4R	15	0.0367647058823529
GO:0019199	MF	GO:0019199	transmembrane receptor protein kinase activity	7/175	79/18432	1.00570482720232e-05	0.000291654399888673	0.000198355079492535	INSR/IGF1R/ERBB4/FGFR2/EPHB4/KDR/EGFR	7	0.0886075949367089
GO:0051287	MF	GO:0051287	NAD binding	6/175	53/18432	1.06610573141488e-05	0.000293712129004799	0.000199754547570366	SORD/AHCY/PARP1/ME2/ALDH2/HADH	6	0.113207547169811
GO:0030170	MF	GO:0030170	pyridoxal phosphate binding	6/175	55/18432	1.32527071313273e-05	0.00034772579187435	0.000236489410463786	CBS/PNPO/PYGL/SDS/OAT/ALB	6	0.109090909090909
GO:0004175	MF	GO:0004175	endopeptidase activity	15/175	426/18432	1.40880025667338e-05	0.000352809004031935	0.00023994651912383	DPP4/ST14/HPN/MMP7/MME/CLPP/CASP7/CTSO/MMP8/CASP3/BACE1/CTSG/CTSD/PLAU/MMP12	15	0.0352112676056338
GO:0070279	MF	GO:0070279	vitamin B6 binding	6/175	56/18432	1.47270546147632e-05	0.000352809004031935	0.00023994651912383	CBS/PNPO/PYGL/SDS/OAT/ALB	6	0.107142857142857
GO:0016765	MF	GO:0016765	transferase activity, transferring alkyl or aryl (other than methyl) groups	6/175	59/18432	1.99619938871505e-05	0.000458294109659164	0.000311687272974806	GSTZ1/GSTT2/FDPS/SRM/FNTA/GSTO1	6	0.101694915254237
GO:0016627	MF	GO:0016627	oxidoreductase activity, acting on the CH-CH group of donors	6/175	60/18432	2.20067801330797e-05	0.000485029434133076	0.000329870051679005	BLVRB/CRAT/ACADM/AKR1C3/DHODH/GCDH	6	0.1
GO:0001223	MF	GO:0001223	transcription coactivator binding	5/175	40/18432	3.66277280849249e-05	0.000776226083645908	0.000527913813693654	THRB/PPARA/STAT1/PPARD/AR	5	0.125
GO:0004252	MF	GO:0004252	serine-type endopeptidase activity	9/175	174/18432	4.36003550385735e-05	0.000889770208379777	0.000605135531919382	DPP4/ST14/HPN/MMP7/CLPP/MMP8/CTSG/PLAU/MMP12	9	0.0517241379310345
GO:0001221	MF	GO:0001221	transcription coregulator binding	7/175	109/18432	8.14456748267734e-05	0.00159194908070524	0.00108268960307778	THRB/NR1H4/RXRA/PPARA/STAT1/PPARD/AR	7	0.0642201834862385
GO:0045296	MF	GO:0045296	cadherin binding	12/175	333/18432	8.37867937213286e-05	0.00159194908070524	0.00108268960307778	CLIC1/CTNNA1/PAK6/PTPN1/HSPA8/DDX6/STAT1/ATIC/SRC/KDR/ARHGAP1/EGFR	12	0.036036036036036
GO:0016763	MF	GO:0016763	pentosyltransferase activity	5/175	48/18432	8.96467813216907e-05	0.00164651255027505	0.00111979839124638	APRT/UMPS/PARP1/PNP/MTAP	5	0.104166666666667
GO:0008236	MF	GO:0008236	serine-type peptidase activity	9/175	192/18432	9.32810359470779e-05	0.00165799518731742	0.00112760776900373	DPP4/ST14/HPN/MMP7/CLPP/MMP8/CTSG/PLAU/MMP12	9	0.046875
GO:0004190	MF	GO:0004190	aspartic-type endopeptidase activity	4/175	26/18432	9.96931354183317e-05	0.0017165911754844	0.00116745908581994	CASP7/CASP3/BACE1/CTSD	4	0.153846153846154
GO:0017171	MF	GO:0017171	serine hydrolase activity	9/175	196/18432	0.000109162273766409	0.00182267917713004	0.00123960987115922	DPP4/ST14/HPN/MMP7/CLPP/MMP8/CTSG/PLAU/MMP12	9	0.0459183673469388
GO:0070001	MF	GO:0070001	aspartic-type peptidase activity	4/175	27/18432	0.000116167501505871	0.00188259686263927	0.00128036007851672	CASP7/CASP3/BACE1/CTSD	4	0.148148148148148
GO:0016853	MF	GO:0016853	isomerase activity	8/175	156/18432	0.000123732359739431	0.00194790086332647	0.00132477353585677	MIF/GSTZ1/FKBP1A/PPIA/FKBP3/GNPDA1/GALE/TPI1	8	0.0512820512820513
GO:0032052	MF	GO:0032052	bile acid binding	3/175	11/18432	0.000131250787905815	0.0020088662260029	0.00136623627176814	NR1H4/AKR1C3/PYGL	3	0.272727272727273
GO:0046875	MF	GO:0046875	ephrin receptor binding	4/175	29/18432	0.000154902733017667	0.00230679475385769	0.00156885840552744	ABL1/GRB2/PTPN1/SRC	4	0.137931034482759
GO:0005527	MF	GO:0005527	macrolide binding	3/175	12/18432	0.00017378028117366	0.00245520345965863	0.00166979163556877	FKBP1A/FKBP3/ALB	3	0.25
GO:0046790	MF	GO:0046790	virion binding	3/175	12/18432	0.00017378028117366	0.00245520345965863	0.00166979163556877	PPIA/CD209/APCS	3	0.25
GO:0042562	MF	GO:0042562	hormone binding	6/175	87/18432	0.00017970150568759	0.00247538824084656	0.00168351936907321	INSR/SULT2B1/IGF1R/THRB/EGFR/AR	6	0.0689655172413793
GO:0070566	MF	GO:0070566	adenylyltransferase activity	4/175	31/18432	0.00020219863087598	0.00271735233201621	0.00184807991249933	ABL1/FHIT/NMNAT1/PAPSS1	4	0.129032258064516
GO:0016810	MF	GO:0016810	hydrolase activity, acting on carbon-nitrogen (but not peptide) bonds	7/175	128/18432	0.000222241528642808	0.00280933763036893	0.00191063940474036	ARG2/FHIT/HINT1/PADI4/ATIC/MTHFD1/DHODH	7	0.0546875
GO:0008353	MF	GO:0008353	RNA polymerase II CTD heptapeptide repeat kinase activity	3/175	13/18432	0.00022433912111839	0.00280933763036893	0.00191063940474036	CDK7/MAPK1/CDK6	3	0.230769230769231
GO:0043560	MF	GO:0043560	insulin receptor substrate binding	3/175	13/18432	0.00022433912111839	0.00280933763036893	0.00191063940474036	INSR/IGF1R/GRB2	3	0.230769230769231
GO:0044389	MF	GO:0044389	ubiquitin-like protein ligase binding	11/175	318/18432	0.000236484016212813	0.00289561539851689	0.00196931718764354	CBS/TNK2/MDM2/FHIT/GSK3B/PRKACA/HSPA8/STAT1/TPI1/EGFR/HSP90AA1	11	0.0345911949685535
GO:0016831	MF	GO:0016831	carboxy-lyase activity	4/175	34/18432	0.000291481209616397	0.00349143796736163	0.00237453800053633	AMD1/UMPS/ME2/PPCDC	4	0.117647058823529
GO:0036041	MF	GO:0036041	long-chain fatty acid binding	3/175	15/18432	0.000351946539827339	0.00412601156265668	0.00280611350903769	PITPNA/PPARD/FABP3	3	0.2
GO:0030145	MF	GO:0030145	manganese ion binding	5/175	65/18432	0.000379741460829289	0.00435911551910288	0.00296464824682515	ARG2/ABL1/IMPA1/PRKACA/ABO	5	0.0769230769230769
GO:0004707	MF	GO:0004707	MAP kinase activity	3/175	16/18432	0.000430148577577022	0.00483697686214162	0.00328964325708743	MAPK8/MAPK1/MAPK14	3	0.1875
GO:0031420	MF	GO:0031420	alkali metal ion binding	3/175	17/18432	0.00051868761051144	0.00571593746783607	0.00388742714404364	ACAT1/IMPA1/PKLR	3	0.176470588235294
GO:0019842	MF	GO:0019842	vitamin binding	7/175	149/18432	0.000558309502197915	0.00603193207276571	0.00410233607394134	CBS/PNPO/SEC14L2/PYGL/SDS/OAT/ALB	7	0.0469798657718121
GO:0031625	MF	GO:0031625	ubiquitin protein ligase binding	10/175	299/18432	0.000590116555904235	0.00608160948011554	0.00413612183574579	CBS/TNK2/MDM2/FHIT/GSK3B/PRKACA/HSPA8/TPI1/EGFR/HSP90AA1	10	0.0334448160535117
GO:0003925	MF	GO:0003925	G protein activity	4/175	41/18432	0.000604439591799828	0.00608160948011554	0.00413612183574579	RAB11A/CDC42/RAB5A/RHOA	4	0.0975609756097561
GO:0016859	MF	GO:0016859	cis-trans isomerase activity	4/175	41/18432	0.000604439591799828	0.00608160948011554	0.00413612183574579	GSTZ1/FKBP1A/PPIA/FKBP3	4	0.0975609756097561
GO:0048029	MF	GO:0048029	monosaccharide binding	5/175	72/18432	0.000609811171732817	0.00608160948011554	0.00413612183574579	HK1/PYGL/SELP/CD209/PKLR	5	0.0694444444444444
GO:0004708	MF	GO:0004708	MAP kinase kinase activity	3/175	18/18432	0.000618094611409202	0.00608160948011554	0.00413612183574579	MAP2K1/MAPK1/MAPK14	3	0.166666666666667
GO:0140297	MF	GO:0140297	DNA-binding transcription factor binding	13/175	476/18432	0.000637547009893725	0.00616295442897268	0.00419144479265312	EIF4E/KAT2B/PARP1/NR1H4/GSK3B/RXRA/CCNT1/PPARA/STAT1/PPARD/SRC/MAPK14/AR	13	0.0273109243697479
GO:1901681	MF	GO:1901681	sulfur compound binding	9/175	270/18432	0.00113140820294376	0.0105942422093674	0.00720517762257104	CBS/PITPNA/PPIA/FGFR2/PGF/SELP/CTSG/GCDH/RTN4R	9	0.0333333333333333
GO:0005158	MF	GO:0005158	insulin receptor binding	3/175	22/18432	0.00113441069029524	0.0105942422093674	0.00720517762257104	IGF1R/PTPN1/SRC	3	0.136363636363636
GO:0030246	MF	GO:0030246	carbohydrate binding	9/175	275/18432	0.0012852054689817	0.0115084307619247	0.00782692014756937	SORD/HK1/LGALS3/PYGL/SELE/SELP/CD209/APCS/PKLR	9	0.0327272727272727
GO:0016538	MF	GO:0016538	cyclin-dependent protein serine/threonine kinase regulator activity	4/175	50/18432	0.00128639759537607	0.0115084307619247	0.00782692014756937	KAT2B/CCNA2/CCNT1/CASP3	4	0.08
GO:0016209	MF	GO:0016209	antioxidant activity	5/175	85/18432	0.0012949595412692	0.0115084307619247	0.00782692014756937	NQO1/GSTZ1/GSR/ALB/GSTO1	5	0.0588235294117647
GO:0016830	MF	GO:0016830	carbon-carbon lyase activity	4/175	51/18432	0.00138564916776372	0.0121189316101239	0.00824212370465971	AMD1/UMPS/ME2/PPCDC	4	0.0784313725490196
GO:0003707	MF	GO:0003707	nuclear steroid receptor activity	3/175	24/18432	0.00147031570195131	0.0126584992464871	0.00860908536010965	RXRA/PPARA/PPARD	3	0.125
GO:0004364	MF	GO:0004364	glutathione transferase activity	3/175	26/18432	0.00186264186918143	0.0157894718449072	0.0107384697235399	GSTZ1/GSTT2/GSTO1	3	0.115384615384615
GO:0061629	MF	GO:0061629	RNA polymerase II-specific DNA-binding transcription factor binding	10/175	350/18432	0.00193011608015616	0.0161135448510007	0.0109588727996108	PARP1/NR1H4/GSK3B/RXRA/PPARA/STAT1/PPARD/SRC/MAPK14/AR	10	0.0285714285714286
GO:0043177	MF	GO:0043177	organic acid binding	6/175	137/18432	0.00198199757009253	0.0162997113600147	0.0110854852309967	FABP5/PITPNA/NR1H4/RXRA/PPARD/FABP3	6	0.0437956204379562
GO:0016655	MF	GO:0016655	oxidoreductase activity, acting on NAD(P)H, quinone or similar compound as acceptor	4/175	57/18432	0.00209579921210922	0.0169821377334144	0.0115496055651839	NQO1/CBR1/AKR1C3/NQO2	4	0.0701754385964912
GO:0004693	MF	GO:0004693	cyclin-dependent protein serine/threonine kinase activity	3/175	29/18432	0.00256370864754658	0.0201800494971166	0.0137245154665651	CDK7/CDK6/CDK2	3	0.103448275862069
GO:0097472	MF	GO:0097472	cyclin-dependent protein kinase activity	3/175	29/18432	0.00256370864754658	0.0201800494971166	0.0137245154665651	CDK7/CDK6/CDK2	3	0.103448275862069
GO:0005496	MF	GO:0005496	steroid binding	5/175	101/18432	0.00276958611643756	0.0214935485937619	0.0146178303551041	SULT2B1/NR1H4/HSD17B1/NR1H3/AR	5	0.0495049504950495
GO:0005154	MF	GO:0005154	epidermal growth factor receptor binding	3/175	33/18432	0.0037232239640152	0.0274527677913262	0.0186707141727235	TNK2/GRB2/ERBB4	3	0.0909090909090909
GO:0005528	MF	GO:0005528	FK506 binding	2/175	10/18432	0.00383641219588406	0.0274527677913262	0.0186707141727235	FKBP1A/FKBP3	2	0.2
GO:0015643	MF	GO:0015643	toxic substance binding	2/175	10/18432	0.00383641219588406	0.0274527677913262	0.0186707141727235	EPHX2/ALB	2	0.2
GO:0016742	MF	GO:0016742	hydroxymethyl-, formyl- and related transferase activity	2/175	10/18432	0.00383641219588406	0.0274527677913262	0.0186707141727235	ATIC/GART	2	0.2
GO:0016801	MF	GO:0016801	hydrolase activity, acting on ether bonds	2/175	10/18432	0.00383641219588406	0.0274527677913262	0.0186707141727235	EPHX2/AHCY	2	0.2
GO:0043208	MF	GO:0043208	glycosphingolipid binding	2/175	10/18432	0.00383641219588406	0.0274527677913262	0.0186707141727235	SELP/RTN4R	2	0.2
GO:0016757	MF	GO:0016757	glycosyltransferase activity	8/175	267/18432	0.00405943389612404	0.0286762573944147	0.0195028133201101	APRT/UMPS/PARP1/HEXB/PNP/ABO/PYGL/MTAP	8	0.0299625468164794
GO:0042277	MF	GO:0042277	peptide binding	9/175	330/18432	0.00436352287973613	0.0304341912244887	0.0206983896760301	FOLH1/INSR/MME/IGF1R/PPIA/RXRA/TGFB2/BACE1/CD209	9	0.0272727272727273
GO:0005536	MF	GO:0005536	glucose binding	2/175	11/18432	0.00465978139765701	0.0313114579281587	0.0212950215348639	HK1/PYGL	2	0.181818181818182
GO:0016813	MF	GO:0016813	hydrolase activity, acting on carbon-nitrogen (but not peptide) bonds, in linear amidines	2/175	11/18432	0.00465978139765701	0.0313114579281587	0.0212950215348639	ARG2/PADI4	2	0.181818181818182
GO:0030283	MF	GO:0030283	testosterone dehydrogenase [NAD(P)] activity	2/175	11/18432	0.00465978139765701	0.0313114579281587	0.0212950215348639	AKR1C3/HSD17B1	2	0.181818181818182
GO:0042056	MF	GO:0042056	chemoattractant activity	3/175	36/18432	0.00477217103372335	0.031680316139537	0.021545883170647	MIF/LGALS3/PGF	3	0.0833333333333333
GO:0019887	MF	GO:0019887	protein kinase regulator activity	7/175	218/18432	0.00487315264116726	0.0319655607771805	0.0217398789505707	MAP2K1/KAT2B/CCNA2/ERBB4/CCNT1/CASP3/EGFR	7	0.0321100917431193
GO:0003995	MF	GO:0003995	acyl-CoA dehydrogenase activity	2/175	12/18432	0.00555698162095367	0.0341233095564933	0.0232073707175692	ACADM/GCDH	2	0.166666666666667
GO:0004861	MF	GO:0004861	cyclin-dependent protein serine/threonine kinase inhibitor activity	2/175	12/18432	0.00555698162095367	0.0341233095564933	0.0232073707175692	KAT2B/CASP3	2	0.166666666666667
GO:0030955	MF	GO:0030955	potassium ion binding	2/175	12/18432	0.00555698162095367	0.0341233095564933	0.0232073707175692	ACAT1/PKLR	2	0.166666666666667
GO:0052890	MF	GO:0052890	oxidoreductase activity, acting on the CH-CH group of donors, with a flavin as acceptor	2/175	12/18432	0.00555698162095367	0.0341233095564933	0.0232073707175692	ACADM/GCDH	2	0.166666666666667
GO:0003755	MF	GO:0003755	peptidyl-prolyl cis-trans isomerase activity	3/175	38/18432	0.00556087697961461	0.0341233095564933	0.0232073707175692	FKBP1A/PPIA/FKBP3	3	0.0789473684210526
GO:1990782	MF	GO:1990782	protein tyrosine kinase binding	5/175	119/18432	0.00557368032683193	0.0341233095564933	0.0232073707175692	CSK/GRB2/PTPN1/FNTA/HSP90AA1	5	0.0420168067226891
GO:0000287	MF	GO:0000287	magnesium ion binding	7/175	225/18432	0.00577314168310941	0.0349560556856405	0.0237737239929086	EPHX2/ABL1/IMPA1/PRKACA/RHEB/CDK2/PKLR	7	0.0311111111111111
GO:0016620	MF	GO:0016620	oxidoreductase activity, acting on the aldehyde or oxo group of donors, NAD or NADP as acceptor	3/175	39/18432	0.0059827650234752	0.0358315600862482	0.0243691573038578	ADH5/ALDH2/AKR1C3	3	0.0769230769230769
GO:0009055	MF	GO:0009055	electron transfer activity	5/175	122/18432	0.00618446334642569	0.0366412828374253	0.0249198523070464	ADH5/ME2/GSR/ALDH2/NQO2	5	0.040983606557377
GO:0140272	MF	GO:0140272	exogenous protein binding	4/175	78/18432	0.00649019200221963	0.037459694734298	0.0254764568256951	DPP4/CD209/EGFR/ALB	4	0.0512820512820513
GO:0031994	MF	GO:0031994	insulin-like growth factor I binding	2/175	13/18432	0.0065265529845601	0.037459694734298	0.0254764568256951	INSR/IGF1R	2	0.153846153846154
GO:0034236	MF	GO:0034236	protein kinase A catalytic subunit binding	2/175	13/18432	0.0065265529845601	0.037459694734298	0.0254764568256951	CSK/GSK3B	2	0.153846153846154
GO:0042169	MF	GO:0042169	SH2 domain binding	3/175	41/18432	0.00688268299725752	0.0390964776442154	0.0265896380577719	ABL1/PTK2/SRC	3	0.0731707317073171
GO:0016835	MF	GO:0016835	carbon-oxygen lyase activity	4/175	80/18432	0.00709197311988179	0.0398742570311721	0.0271186082779583	CBS/ALAD/CA12/TPI1	4	0.05
GO:0016004	MF	GO:0016004	phospholipase activator activity	2/175	14/18432	0.00756705639727121	0.0414509959936341	0.0281909534315288	CASP3/SRC	2	0.142857142857143
GO:0044594	MF	GO:0044594	17-beta-hydroxysteroid dehydrogenase (NAD+) activity	2/175	14/18432	0.00756705639727121	0.0414509959936341	0.0281909534315288	AKR1C3/HSD17B1	2	0.142857142857143
GO:0005539	MF	GO:0005539	glycosaminoglycan binding	7/175	237/18432	0.00759809545436851	0.0414509959936341	0.0281909534315288	HK1/PPIA/FGFR2/PGF/SELP/CTSG/RTN4R	7	0.029535864978903
GO:0048156	MF	GO:0048156	tau protein binding	3/175	43/18432	0.00785875612427448	0.0420405303347111	0.0285918976008351	GSK3B/PPP5C/HSP90AA1	3	0.0697674418604651
GO:0051879	MF	GO:0051879	Hsp90 protein binding	3/175	43/18432	0.00785875612427448	0.0420405303347111	0.0285918976008351	CSNK2A1/KDR/PPP5C	3	0.0697674418604651
GO:0019838	MF	GO:0019838	growth factor binding	5/175	132/18432	0.00855923314590347	0.0430699521001715	0.0292920105982636	INSR/IGF1R/FGFR2/KDR/EGFR	5	0.0378787878787879
GO:0004029	MF	GO:0004029	aldehyde dehydrogenase (NAD+) activity	2/175	15/18432	0.00867707329841644	0.0430699521001715	0.0292920105982636	ADH5/ALDH2	2	0.133333333333333
GO:0010181	MF	GO:0010181	FMN binding	2/175	15/18432	0.00867707329841644	0.0430699521001715	0.0292920105982636	PNPO/PPCDC	2	0.133333333333333
GO:0015929	MF	GO:0015929	hexosaminidase activity	2/175	15/18432	0.00867707329841644	0.0430699521001715	0.0292920105982636	HEXB/GM2A	2	0.133333333333333
GO:0016208	MF	GO:0016208	AMP binding	2/175	15/18432	0.00867707329841644	0.0430699521001715	0.0292920105982636	APRT/PYGL	2	0.133333333333333
GO:0070492	MF	GO:0070492	oligosaccharide binding	2/175	15/18432	0.00867707329841644	0.0430699521001715	0.0292920105982636	SELE/SELP	2	0.133333333333333
GO:0097153	MF	GO:0097153	cysteine-type endopeptidase activity involved in apoptotic process	2/175	15/18432	0.00867707329841644	0.0430699521001715	0.0292920105982636	CASP7/CASP3	2	0.133333333333333
GO:1901611	MF	GO:1901611	phosphatidylglycerol binding	2/175	15/18432	0.00867707329841644	0.0430699521001715	0.0292920105982636	PITPNA/MME	2	0.133333333333333
GO:0051117	MF	GO:0051117	ATPase binding	4/175	85/18432	0.00875469080802035	0.0430699521001715	0.0292920105982636	CLPP/SRC/EGFR/AR	4	0.0470588235294118
GO:0019207	MF	GO:0019207	kinase regulator activity	7/175	246/18432	0.00922402698785822	0.0449773351354857	0.0305892278311833	MAP2K1/KAT2B/CCNA2/ERBB4/CCNT1/CASP3/EGFR	7	0.0284552845528455
GO:0001784	MF	GO:0001784	phosphotyrosine residue binding	3/175	46/18432	0.00946869498878157	0.0450548652243393	0.0306419562897407	ABL1/MAPK1/GRB2	3	0.0652173913043478
GO:0016651	MF	GO:0016651	oxidoreductase activity, acting on NAD(P)H	4/175	87/18432	0.00948523478407143	0.0450548652243393	0.0306419562897407	NQO1/CBR1/AKR1C3/NQO2	4	0.0459770114942529
GO:0050660	MF	GO:0050660	flavin adenine dinucleotide binding	4/175	87/18432	0.00948523478407143	0.0450548652243393	0.0306419562897407	ACADM/GSR/NQO2/GCDH	4	0.0459770114942529
GO:0016903	MF	GO:0016903	oxidoreductase activity, acting on the aldehyde or oxo group of donors	3/175	47/18432	0.0100448417146582	0.0473051947416807	0.0321724125093865	ADH5/ALDH2/AKR1C3	3	0.0638297872340425
GO:0002020	MF	GO:0002020	protease binding	5/175	139/18432	0.0105557590876524	0.0485408017185552	0.0330127527209965	DPP4/MIF/GSK3B/CASP3/CTSG	5	0.0359712230215827
GO:0016922	MF	GO:0016922	nuclear receptor binding	5/175	139/18432	0.0105557590876524	0.0485408017185552	0.0330127527209965	PARP1/NR1H4/RXRA/STAT1/SRC	5	0.0359712230215827
GO:0070851	MF	GO:0070851	growth factor receptor binding	5/175	140/18432	0.010864841237795	0.0485408017185552	0.0330127527209965	TNK2/GRB2/ERBB4/PGF/SRC	5	0.0357142857142857
GO:0004030	MF	GO:0004030	aldehyde dehydrogenase [NAD(P)+] activity	2/175	17/18432	0.0111000744401778	0.0485408017185552	0.0330127527209965	ADH5/ALDH2	2	0.117647058823529
GO:0004115	MF	GO:0004115	3',5'-cyclic-AMP phosphodiesterase activity	2/175	17/18432	0.0111000744401778	0.0485408017185552	0.0330127527209965	PDE4B/PDE3B	2	0.117647058823529
GO:0004659	MF	GO:0004659	prenyltransferase activity	2/175	17/18432	0.0111000744401778	0.0485408017185552	0.0330127527209965	FDPS/FNTA	2	0.117647058823529
GO:0060229	MF	GO:0060229	lipase activator activity	2/175	17/18432	0.0111000744401778	0.0485408017185552	0.0330127527209965	CASP3/SRC	2	0.117647058823529
GO:0070064	MF	GO:0070064	proline-rich region binding	2/175	17/18432	0.0111000744401778	0.0485408017185552	0.0330127527209965	CSK/ABL1	2	0.117647058823529
GO:0140693	MF	GO:0140693	molecular condensate scaffold activity	2/175	17/18432	0.0111000744401778	0.0485408017185552	0.0330127527209965	LGALS3/CCNT1	2	0.117647058823529
GO:0051219	MF	GO:0051219	phosphoprotein binding	4/175	92/18432	0.0114819494852132	0.0498153871366336	0.0338796022937082	ABL1/MAPK1/GRB2/SRC	4	0.0434782608695652
GO:0004303	MF	GO:0004303	estradiol 17-beta-dehydrogenase activity	2/175	18/18432	0.0124103219187738	0.0527881937115135	0.0359014174444528	AKR1C3/HSD17B1	2	0.111111111111111
GO:0016646	MF	GO:0016646	oxidoreductase activity, acting on the CH-NH group of donors, NAD or NADP as acceptor	2/175	18/18432	0.0124103219187738	0.0527881937115135	0.0359014174444528	BLVRB/MTHFD1	2	0.111111111111111
GO:0016860	MF	GO:0016860	intramolecular oxidoreductase activity	3/175	51/18432	0.0125503691038263	0.0527881937115135	0.0359014174444528	MIF/GNPDA1/TPI1	3	0.0588235294117647
GO:0051018	MF	GO:0051018	protein kinase A binding	3/175	51/18432	0.0125503691038263	0.0527881937115135	0.0359014174444528	CSK/GSK3B/PRKACA	3	0.0588235294117647
GO:0005520	MF	GO:0005520	insulin-like growth factor binding	2/175	19/18432	0.0137846088635769	0.057540299119931	0.0391333393575231	INSR/IGF1R	2	0.105263157894737
GO:0050661	MF	GO:0050661	NADP binding	3/175	53/18432	0.0139251809655521	0.0576900354287157	0.0392351754945511	HMGCR/GSR/HSD17B1	3	0.0566037735849057
GO:0008238	MF	GO:0008238	exopeptidase activity	4/175	98/18432	0.0142117231111171	0.0584377569718321	0.0397437032801074	FOLH1/DPP4/HPN/MME	4	0.0408163265306122
GO:0001972	MF	GO:0001972	retinoic acid binding	2/175	20/18432	0.0152216155786121	0.0616699278221711	0.0419419128946278	FABP5/RXRA	2	0.1
GO:0016500	MF	GO:0016500	protein-hormone receptor activity	2/175	20/18432	0.0152216155786121	0.0616699278221711	0.0419419128946278	INSR/IGF1R	2	0.1
GO:0005080	MF	GO:0005080	protein kinase C binding	3/175	55/18432	0.0153822804147299	0.0618659599161763	0.0420752349415584	ABL1/HINT1/SRC	3	0.0545454545454545
GO:0005126	MF	GO:0005126	cytokine receptor binding	7/175	273/18432	0.0156280789245031	0.0623990687492842	0.0424378039444936	MIF/FKBP1A/GRB2/STAT1/CASP3/TGFB2/PGF	7	0.0256410256410256
GO:0045309	MF	GO:0045309	protein phosphorylated amino acid binding	3/175	58/18432	0.017723336519103	0.0702558159857966	0.0477812025808456	ABL1/MAPK1/GRB2	3	0.0517241379310345
GO:0000062	MF	GO:0000062	fatty-acyl-CoA binding	2/175	22/18432	0.0182786044749514	0.0714291564943138	0.048579195170457	PITPNA/GCDH	2	0.0909090909090909
GO:0033691	MF	GO:0033691	sialic acid binding	2/175	22/18432	0.0182786044749514	0.0714291564943138	0.048579195170457	SELE/SELP	2	0.0909090909090909
GO:0047485	MF	GO:0047485	protein N-terminus binding	4/175	106/18432	0.0184450013820029	0.0715718011372085	0.0486762082430915	MAP2K1/CSNK2A1/PARP1/MDM2	4	0.0377358490566038
GO:0043274	MF	GO:0043274	phospholipase binding	2/175	23/18432	0.0198960414892593	0.076129992087374	0.0517762483200022	SELE/SRC	2	0.0869565217391304
GO:1901567	MF	GO:1901567	fatty acid derivative binding	2/175	23/18432	0.0198960414892593	0.076129992087374	0.0517762483200022	PITPNA/GCDH	2	0.0869565217391304
GO:0004114	MF	GO:0004114	3',5'-cyclic-nucleotide phosphodiesterase activity	2/175	24/18432	0.0215711074699236	0.0803086501076211	0.0546181668513002	PDE4B/PDE3B	2	0.0833333333333333
GO:0005160	MF	GO:0005160	transforming growth factor beta receptor binding	2/175	24/18432	0.0215711074699236	0.0803086501076211	0.0546181668513002	FKBP1A/TGFB2	2	0.0833333333333333
GO:0008106	MF	GO:0008106	alcohol dehydrogenase (NADP+) activity	2/175	24/18432	0.0215711074699236	0.0803086501076211	0.0546181668513002	CBR1/AKR1C3	2	0.0833333333333333
GO:0008483	MF	GO:0008483	transaminase activity	2/175	24/18432	0.0215711074699236	0.0803086501076211	0.0546181668513002	BCAT2/OAT	2	0.0833333333333333
GO:0004222	MF	GO:0004222	metalloendopeptidase activity	4/175	112/18432	0.022083191246775	0.0816633448118994	0.0555394990028392	MMP7/MME/MMP8/MMP12	4	0.0357142857142857
GO:0016769	MF	GO:0016769	transferase activity, transferring nitrogenous groups	2/175	25/18432	0.0233025755362132	0.0850312524533342	0.057830023638145	BCAT2/OAT	2	0.08
GO:0120227	MF	GO:0120227	acyl-CoA binding	2/175	25/18432	0.0233025755362132	0.0850312524533342	0.057830023638145	PITPNA/GCDH	2	0.08
GO:0008201	MF	GO:0008201	heparin binding	5/175	171/18432	0.0237369438884879	0.0860464215957687	0.0585204433815907	FGFR2/PGF/SELP/CTSG/RTN4R	5	0.0292397660818713
GO:0016836	MF	GO:0016836	hydro-lyase activity	3/175	65/18432	0.0239162803177888	0.0860677591582871	0.0585349551253228	CBS/ALAD/CA12	3	0.0461538461538462
GO:0030295	MF	GO:0030295	protein kinase activator activity	4/175	115/18432	0.0240552357720077	0.0860677591582871	0.0585349551253228	MAP2K1/ERBB4/CCNT1/EGFR	4	0.0347826086956522
GO:0097110	MF	GO:0097110	scaffold protein binding	3/175	66/18432	0.0248846855444259	0.0884610434514753	0.0601626353400043	MAP2K1/SRC/HSP90AA1	3	0.0454545454545455
GO:0004112	MF	GO:0004112	cyclic-nucleotide phosphodiesterase activity	2/175	26/18432	0.0250892366751326	0.08861647056409	0.0602683418107098	PDE4B/PDE3B	2	0.0769230769230769
GO:0002039	MF	GO:0002039	p53 binding	3/175	67/18432	0.02587400077856	0.0908062065540543	0.0617575881808069	SETD7/MDM2/GSK3B	3	0.0447761194029851
GO:0023026	MF	GO:0023026	MHC class II protein complex binding	2/175	27/18432	0.0269298995159319	0.0939137635017624	0.0638710474861542	HSPA8/HSP90AA1	2	0.0740740740740741
GO:0004197	MF	GO:0004197	cysteine-type endopeptidase activity	4/175	120/18432	0.0275725021890111	0.095549991862548	0.0649838515676131	CASP7/CTSO/CASP3/CTSD	4	0.0333333333333333
GO:0019209	MF	GO:0019209	kinase activator activity	4/175	121/18432	0.028310848076917	0.0968395606652103	0.0658608913875535	MAP2K1/ERBB4/CCNT1/EGFR	4	0.0330578512396694
GO:0005525	MF	GO:0005525	GTP binding	8/175	379/18432	0.0285659684408268	0.0968395606652103	0.0658608913875535	RAB11A/CDC42/INSR/RAB5A/ARL5A/RHEB/RHOA/HSP90AA1	8	0.0211081794195251
GO:0016628	MF	GO:0016628	oxidoreductase activity, acting on the CH-CH group of donors, NAD or NADP as acceptor	2/175	28/18432	0.0288233901072495	0.0968395606652103	0.0658608913875535	BLVRB/AKR1C3	2	0.0714285714285714
GO:0016645	MF	GO:0016645	oxidoreductase activity, acting on the CH-NH group of donors	2/175	28/18432	0.0288233901072495	0.0968395606652103	0.0658608913875535	BLVRB/MTHFD1	2	0.0714285714285714
GO:0051019	MF	GO:0051019	mitogen-activated protein kinase binding	2/175	28/18432	0.0288233901072495	0.0968395606652103	0.0658608913875535	ABL1/MAPK14	2	0.0714285714285714
GO:0008022	MF	GO:0008022	protein C-terminus binding	5/175	181/18432	0.0293736139893568	0.0980900685341552	0.0667113657429731	MAP2K1/CDK7/CSK/ABL1/SRC	5	0.0276243093922652
GO:0031072	MF	GO:0031072	heat shock protein binding	4/175	124/18432	0.0305961953604888	0.100316402277919	0.0682255023611407	CSNK2A1/HSPA8/KDR/PPP5C	4	0.032258064516129
GO:0051082	MF	GO:0051082	unfolded protein binding	4/175	124/18432	0.0305961953604888	0.100316402277919	0.0682255023611407	PPIA/HSPA8/APCS/HSP90AA1	4	0.032258064516129
GO:0046625	MF	GO:0046625	sphingolipid binding	2/175	29/18432	0.0307685516968571	0.100316402277919	0.0682255023611407	SELP/RTN4R	2	0.0689655172413793
GO:0051861	MF	GO:0051861	glycolipid binding	2/175	29/18432	0.0307685516968571	0.100316402277919	0.0682255023611407	SELP/RTN4R	2	0.0689655172413793
GO:0008237	MF	GO:0008237	metallopeptidase activity	5/175	184/18432	0.0312158866006414	0.101176197158549	0.0688102515778845	FOLH1/MMP7/MME/MMP8/MMP12	5	0.0271739130434783
GO:0008234	MF	GO:0008234	cysteine-type peptidase activity	5/175	185/18432	0.0318457416034882	0.102574424586378	0.0697611904723479	CASP7/CTSO/HINT1/CASP3/CTSD	5	0.027027027027027
GO:0016779	MF	GO:0016779	nucleotidyltransferase activity	4/175	126/18432	0.0321785911788396	0.102574424586378	0.0697611904723479	ABL1/FHIT/NMNAT1/PAPSS1	4	0.0317460317460317
GO:0019003	MF	GO:0019003	GDP binding	3/175	73/18432	0.032247474822167	0.102574424586378	0.0697611904723479	RAB5A/RHEB/RHOA	3	0.0410958904109589
GO:0030296	MF	GO:0030296	protein tyrosine kinase activator activity	2/175	30/18432	0.0327642445139791	0.102574424586378	0.0697611904723479	ERBB4/EGFR	2	0.0666666666666667
GO:0043548	MF	GO:0043548	phosphatidylinositol 3-kinase binding	2/175	30/18432	0.0327642445139791	0.102574424586378	0.0697611904723479	INSR/IGF1R	2	0.0666666666666667
GO:0051721	MF	GO:0051721	protein phosphatase 2A binding	2/175	30/18432	0.0327642445139791	0.102574424586378	0.0697611904723479	PTPN1/STAT1	2	0.0666666666666667
GO:0042826	MF	GO:0042826	histone deacetylase binding	4/175	128/18432	0.0338082408484752	0.104653599480392	0.0711752438915268	KAT2B/PARP1/MAPK8/HSP90AA1	4	0.03125
GO:0044325	MF	GO:0044325	transmembrane transporter binding	4/175	128/18432	0.0338082408484752	0.104653599480392	0.0711752438915268	PDE4B/FKBP1A/SRC/HSP90AA1	4	0.03125
GO:0004033	MF	GO:0004033	aldo-keto reductase (NADP) activity	2/175	31/18432	0.0348093455541574	0.105966571272601	0.072068200158651	CBR1/AKR1C3	2	0.0645161290322581
GO:0033764	MF	GO:0033764	steroid dehydrogenase activity, acting on the CH-OH group of donors, NAD or NADP as acceptor	2/175	31/18432	0.0348093455541574	0.105966571272601	0.072068200158651	AKR1C3/HSD17B1	2	0.0645161290322581
GO:0051059	MF	GO:0051059	NF-kappaB binding	2/175	31/18432	0.0348093455541574	0.105966571272601	0.072068200158651	GSK3B/PPARD	2	0.0645161290322581
GO:0140318	MF	GO:0140318	protein transporter activity	2/175	32/18432	0.0369027483666341	0.110529447492308	0.0751714267021903	AZGP1/IGF1R	2	0.0625
GO:0001618	MF	GO:0001618	virus receptor activity	3/175	77/18432	0.0369100151335474	0.110529447492308	0.0751714267021903	DPP4/CD209/EGFR	3	0.038961038961039
GO:0030971	MF	GO:0030971	receptor tyrosine kinase binding	3/175	77/18432	0.0369100151335474	0.110529447492308	0.0751714267021903	GRB2/PTPN1/FNTA	3	0.038961038961039
GO:0019001	MF	GO:0019001	guanyl nucleotide binding	8/175	401/18432	0.037932775943219	0.112370750240396	0.0764237025228407	RAB11A/CDC42/INSR/RAB5A/ARL5A/RHEB/RHOA/HSP90AA1	8	0.0199501246882793
GO:0032561	MF	GO:0032561	guanyl ribonucleotide binding	8/175	401/18432	0.037932775943219	0.112370750240396	0.0764237025228407	RAB11A/CDC42/INSR/RAB5A/ARL5A/RHEB/RHOA/HSP90AA1	8	0.0199501246882793
GO:0030291	MF	GO:0030291	protein serine/threonine kinase inhibitor activity	2/175	33/18432	0.0390433628442224	0.115042208166666	0.078240569504887	KAT2B/CASP3	2	0.0606060606060606
GO:0030332	MF	GO:0030332	cyclin binding	2/175	34/18432	0.0412301150156402	0.120839326455413	0.0821832079819031	CDK6/CDK2	2	0.0588235294117647
GO:0097718	MF	GO:0097718	disordered domain specific binding	2/175	35/18432	0.043461946840277	0.126706522269802	0.0861735064056731	MDM2/HSP90AA1	2	0.0571428571428571
GO:0016814	MF	GO:0016814	hydrolase activity, acting on carbon-nitrogen (but not peptide) bonds, in cyclic amidines	2/175	36/18432	0.0457378160053683	0.131945217900303	0.0897363598672424	ATIC/MTHFD1	2	0.0555555555555556
GO:0023023	MF	GO:0023023	MHC protein complex binding	2/175	36/18432	0.0457378160053683	0.131945217900303	0.0897363598672424	HSPA8/HSP90AA1	2	0.0555555555555556
GO:0001540	MF	GO:0001540	amyloid-beta binding	3/175	85/18432	0.0472084842012333	0.135478514556664	0.0921393660945124	INSR/TGFB2/BACE1	3	0.0352941176470588
GO:0001530	MF	GO:0001530	lipopolysaccharide binding	2/175	37/18432	0.0480566957255507	0.136490924457621	0.0928279092691049	SELP/RNASE3	2	0.0540540540540541
GO:0016229	MF	GO:0016229	steroid dehydrogenase activity	2/175	37/18432	0.0480566957255507	0.136490924457621	0.0928279092691049	AKR1C3/HSD17B1	2	0.0540540540540541
GO:0008013	MF	GO:0008013	beta-catenin binding	3/175	87/18432	0.0499817830056331	0.141015652660751	0.0959051912259571	CTNNA1/GSK3B/AR	3	0.0344827586206897

## Sheet: KEGG
	ID	Description	GeneRatio	BgRatio	pvalue	p.adjust	qvalue	geneID	Count
hsa05215	hsa05215	Prostate cancer	13/156	98/8844	1.4298761779548e-08	1.61926129528081e-06	8.19349205737659e-07	AKT1/MAP2K1/IGF1R/MDM2/MAPK1/GRB2/GSK3B/FGFR2/EGFR/CDK2/HSP90AA1/PLAU/AR	13
hsa05205	hsa05205	Proteoglycans in cancer	18/156	204/8844	1.66103350697247e-08	1.61926129528081e-06	8.19349205737659e-07	AKT1/MAP2K1/CDC42/IGF1R/MDM2/MAPK1/GRB2/ERBB4/PRKACA/CASP3/TGFB2/PTK2/RHOA/SRC/KDR/EGFR/PLAU/MAPK14	18
hsa04910	hsa04910	Insulin signaling pathway	15/156	138/8844	1.7044855739798e-08	1.61926129528081e-06	8.19349205737659e-07	AKT1/MAP2K1/INSR/EIF4E/HK1/MAPK8/MAPK1/GRB2/GSK3B/PTPN1/PRKACA/RHEB/PYGL/PDE3B/PKLR	15
hsa04012	hsa04012	ErbB signaling pathway	12/156	86/8844	2.94728173452123e-08	2.09993823584638e-06	1.06257262534055e-06	AKT1/MAP2K1/ABL1/MAPK8/MAPK1/PAK6/GRB2/GSK3B/ERBB4/PTK2/SRC/EGFR	12
hsa01521	hsa01521	EGFR tyrosine kinase inhibitor resistance	11/156	80/8844	1.3283350897221e-07	6.94853895318273e-06	3.51597354233069e-06	AKT1/MAP2K1/EIF4E/IGF1R/MAPK1/GRB2/GSK3B/FGFR2/SRC/KDR/EGFR	11
hsa01522	hsa01522	Endocrine resistance	12/156	99/8844	1.46285030593321e-07	6.94853895318273e-06	3.51597354233069e-06	AKT1/MAP2K1/IGF1R/MDM2/MAPK8/MAPK1/GRB2/PRKACA/PTK2/SRC/EGFR/MAPK14	12
hsa05417	hsa05417	Lipid and atherosclerosis	17/156	216/8844	2.26946452194654e-07	9.23996269649662e-06	4.67543818807031e-06	AKT1/CDC42/CYP2C9/MAPK8/CASP7/MAPK1/GSK3B/RXRA/HSPA8/CASP3/SELE/PTK2/RHOA/SRC/SELP/HSP90AA1/MAPK14	17
hsa05208	hsa05208	Chemical carcinogenesis - reactive oxygen species	17/156	226/8844	4.33539546827459e-07	1.54448463557282e-05	7.81512077833709e-06	EPHX2/AKT1/NQO1/MAP2K1/GSTT2/CBR1/ABL1/MAPK8/MAPK1/GRB2/PTPN1/AKR1C3/PTK2/SRC/EGFR/GSTO1/MAPK14	17
hsa04510	hsa04510	Focal adhesion	16/156	203/8844	5.16156902341437e-07	1.59167006116202e-05	8.05387990320209e-06	AKT1/MAP2K1/CDC42/XIAP/IGF1R/MAPK8/MAPK1/PAK6/GRB2/GSK3B/PTK2/PGF/RHOA/SRC/KDR/EGFR	16
hsa04068	hsa04068	FoxO signaling pathway	13/156	133/8844	5.58480723214743e-07	1.59167006116202e-05	8.05387990320209e-06	AKT1/MAP2K1/SETD7/INSR/IGF1R/MDM2/MAPK8/MAPK1/GRB2/TGFB2/EGFR/CDK2/MAPK14	13
hsa04014	hsa04014	Ras signaling pathway	17/156	238/8844	8.99253575956552e-07	2.32988426497834e-05	1.17892574072773e-05	AKT1/MAP2K1/CDC42/INSR/IGF1R/ABL1/RAB5A/MAPK8/MAPK1/PAK6/GRB2/PRKACA/FGFR2/PGF/RHOA/KDR/EGFR	17
hsa04010	hsa04010	MAPK signaling pathway	19/156	300/8844	1.23892751032616e-06	2.94245283702463e-05	1.48888656942705e-05	AKT1/MAP2K1/CDC42/INSR/IGF1R/MAPK8/MAPK1/GRB2/ERBB4/PRKACA/HSPA8/CASP3/FGFR2/TGFB2/PGF/KDR/EGFR/PPP5C/MAPK14	19
hsa04919	hsa04919	Thyroid hormone signaling pathway	12/156	122/8844	1.44915480563414e-06	3.17699322773639e-05	1.60756444025812e-05	AKT1/MAP2K1/KAT2B/THRB/MDM2/MAPK1/GSK3B/RXRA/PRKACA/RHEB/STAT1/SRC	12
hsa00230	hsa00230	Purine metabolism	12/156	128/8844	2.41843166322662e-06	4.92323588585418e-05	2.49116645009058e-05	PDE4B/APRT/FHIT/ADK/IMPDH2/IMPDH1/GMPR2/PNP/ATIC/GART/PAPSS1/PDE3B	12
hsa05210	hsa05210	Colorectal cancer	10/156	87/8844	2.72637129936067e-06	5.18010546878528e-05	2.62114293342044e-05	AKT1/MAP2K1/MAPK8/MAPK1/GRB2/GSK3B/CASP3/TGFB2/RHOA/EGFR	10
hsa04914	hsa04914	Progesterone-mediated oocyte maturation	11/156	111/8844	3.75177768917565e-06	6.43935903170618e-05	3.25832756174976e-05	AKT1/MAP2K1/IGF1R/MAPK8/MAPK1/CCNA2/PRKACA/CDK2/PDE3B/HSP90AA1/MAPK14	11
hsa04917	hsa04917	Prolactin signaling pathway	9/156	71/8844	3.8410211768072e-06	6.43935903170618e-05	3.25832756174976e-05	AKT1/MAP2K1/MAPK8/MAPK1/GRB2/GSK3B/STAT1/SRC/MAPK14	9
hsa05160	hsa05160	Hepatitis C	13/156	159/8844	4.24515613686152e-06	6.7214972166974e-05	3.40109000438613e-05	AKT1/MAP2K1/MAPK1/GRB2/GSK3B/RXRA/CDK6/PPARA/STAT1/CASP3/NR1H3/EGFR/CDK2	13
hsa05223	hsa05223	Non-small cell lung cancer	9/156	73/8844	4.85880578345733e-06	7.0890535524988e-05	3.58707418907603e-05	AKT1/MAP2K1/MAPK1/FHIT/GRB2/RXRA/CDK6/RARB/EGFR	9
hsa04520	hsa04520	Adherens junction	10/156	93/8844	5.02913626638704e-06	7.0890535524988e-05	3.58707418907603e-05	CDC42/INSR/IGF1R/CSNK2A1/MAPK1/CTNNA1/PTPN1/RHOA/SRC/EGFR	10
hsa04151	hsa04151	PI3K-Akt signaling pathway	20/156	362/8844	5.24977549162446e-06	7.0890535524988e-05	3.58707418907603e-05	AKT1/MAP2K1/INSR/EIF4E/IGF1R/MDM2/MAPK1/GRB2/GSK3B/ERBB4/RXRA/CDK6/RHEB/FGFR2/PTK2/PGF/KDR/EGFR/CDK2/HSP90AA1	20
hsa05207	hsa05207	Chemical carcinogenesis - receptor activation	15/156	215/8844	5.4722518650868e-06	7.0890535524988e-05	3.58707418907603e-05	EPHX2/AKT1/MAP2K1/XIAP/GSTT2/MAPK1/GRB2/RXRA/PRKACA/PPARA/SRC/EGFR/GSTO1/HSP90AA1/AR	15
hsa05418	hsa05418	Fluid shear stress and atherosclerosis	12/156	141/8844	6.66701987901261e-06	8.26130724138519e-05	4.18023672047931e-05	AKT1/NQO1/GSTT2/MAPK8/SELE/PTK2/RHOA/SRC/KDR/GSTO1/HSP90AA1/MAPK14	12
hsa05212	hsa05212	Pancreatic cancer	9/156	77/8844	7.60305557227673e-06	9.02862849207862e-05	4.56850269035927e-05	AKT1/MAP2K1/CDC42/MAPK8/MAPK1/CDK6/STAT1/TGFB2/EGFR	9
hsa04370	hsa04370	VEGF signaling pathway	8/156	60/8844	9.20527402501949e-06	0.000104940123885222	5.30998964811651e-05	AKT1/MAP2K1/CDC42/MAPK1/PTK2/SRC/KDR/MAPK14	8
hsa05163	hsa05163	Human cytomegalovirus infection	15/156	226/8844	1.00335083770874e-05	0.000109982687979611	5.56514432251404e-05	AKT1/MAP2K1/MDM2/MAPK1/GRB2/GSK3B/PRKACA/CDK6/RHEB/CASP3/PTK2/RHOA/SRC/EGFR/MAPK14	15
hsa05226	hsa05226	Gastric cancer	12/156	150/8844	1.25896931825346e-05	0.000132891205815642	6.72431955558376e-05	AKT1/MAP2K1/MAPK1/CTNNA1/GRB2/GSK3B/RXRA/RARB/FGFR2/TGFB2/EGFR/CDK2	12
hsa01240	hsa01240	Biosynthesis of cofactors	12/156	153/8844	1.5396179553219e-05	0.00015671111330955	7.92961127365039e-05	NQO1/BCAT2/FECH/ALAD/UMPS/PNPO/PPCDC/ALDH2/NMNAT1/RFK/MTHFD1/DHODH	12
hsa00620	hsa00620	Pyruvate metabolism	7/156	47/8844	1.61512417361209e-05	0.000158727720510153	8.03165197041219e-05	GLO1/ADH5/ACAT1/HAGH/ME2/ALDH2/PKLR	7
hsa04932	hsa04932	Non-alcoholic fatty liver disease	12/156	157/8844	1.99802288361309e-05	0.000189812173943243	9.60453105456116e-05	AKT1/CDC42/INSR/MAPK8/CASP7/GSK3B/RXRA/PPARA/CASP3/NR1H3/MAPK14/PKLR	12
hsa05161	hsa05161	Hepatitis B	12/156	163/8844	2.90816990742239e-05	0.000267364007617865	0.000135286681601653	AKT1/MAP2K1/MAPK8/MAPK1/CCNA2/GRB2/STAT1/CASP3/TGFB2/SRC/CDK2/MAPK14	12
hsa00270	hsa00270	Cysteine and methionine metabolism	7/156	52/8844	3.1911955047103e-05	0.000284215849638261	0.000143813744784642	AMD1/AHCY/BCAT2/CBS/SRM/SDS/MTAP	7
hsa04912	hsa04912	GnRH signaling pathway	9/156	93/8844	3.5652630822383e-05	0.000298852934834681	0.000151220136924659	MAP2K1/CDC42/MAPK8/MAPK1/GRB2/PRKACA/SRC/EGFR/MAPK14	9
hsa05222	hsa05222	Small cell lung cancer	9/156	93/8844	3.5652630822383e-05	0.000298852934834681	0.000151220136924659	AKT1/XIAP/FHIT/RXRA/CDK6/RARB/CASP3/PTK2/CDK2	9
hsa05225	hsa05225	Hepatocellular carcinoma	12/156	170/8844	4.40834673217858e-05	0.000358965376763113	0.000181637143551418	AKT1/NQO1/MAP2K1/GSTT2/IGF1R/MAPK1/GRB2/GSK3B/CDK6/TGFB2/EGFR/GSTO1	12
hsa04722	hsa04722	Neurotrophin signaling pathway	10/156	120/8844	4.80846089412807e-05	0.000380669820785139	0.000192619632308639	AKT1/MAP2K1/CDC42/ABL1/MAPK8/MAPK1/GRB2/GSK3B/RHOA/MAPK14	10
hsa05214	hsa05214	Glioma	8/156	76/8844	5.34433690862723e-05	0.000404859673332226	0.0002048597423694	AKT1/MAP2K1/IGF1R/MDM2/MAPK1/GRB2/CDK6/EGFR	8
hsa04660	hsa04660	T cell receptor signaling pathway	10/156	122/8844	5.54018500349362e-05	0.000404859673332226	0.0002048597423694	AKT1/MAP2K1/CDC42/MAPK8/MAPK1/PAK6/GRB2/GSK3B/RHOA/MAPK14	10
hsa04935	hsa04935	Growth hormone synthesis, secretion and action	10/156	122/8844	5.54018500349362e-05	0.000404859673332226	0.0002048597423694	AKT1/MAP2K1/MAPK8/MAPK1/GRB2/GSK3B/PRKACA/STAT1/PTK2/MAPK14	10
hsa05220	hsa05220	Chronic myeloid leukemia	8/156	77/8844	5.87581880444168e-05	0.00041865208981647	0.000211838730581187	AKT1/MAP2K1/ABL1/MDM2/MAPK1/GRB2/CDK6/TGFB2	8
hsa05203	hsa05203	Viral carcinogenesis	13/156	205/8844	6.44838159520043e-05	0.000448241159666371	0.000226810854568025	CDC42/HPN/KAT2B/MDM2/MAPK1/CCNA2/GRB2/PRKACA/CDK6/CASP3/RHOA/SRC/CDK2	13
hsa04933	hsa04933	AGE-RAGE signaling pathway in diabetic complications	9/156	101/8844	6.86582021209118e-05	0.00046589494296333	0.000235743701517918	AKT1/CDC42/MAPK8/MAPK1/STAT1/CASP3/TGFB2/SELE/MAPK14	9
hsa05213	hsa05213	Endometrial cancer	7/156	59/8844	7.33915080094666e-05	0.000486432087969721	0.00024613553481755	AKT1/MAP2K1/MAPK1/CTNNA1/GRB2/GSK3B/EGFR	7
hsa05152	hsa05152	Tuberculosis	12/156	180/8844	7.69405168431631e-05	0.000498364711370488	0.000252173464294578	AKT1/RAB5A/MAPK8/MAPK1/STAT1/CASP3/TGFB2/RHOA/SRC/CD209/CTSD/MAPK14	12
hsa04015	hsa04015	Rap1 signaling pathway	13/156	212/8844	9.09013007915317e-05	0.000566055874510398	0.000286425317850137	AKT1/MAP2K1/CDC42/INSR/IGF1R/MAPK1/FGFR2/PGF/RHOA/SRC/KDR/EGFR/MAPK14	13
hsa04625	hsa04625	C-type lectin receptor signaling pathway	9/156	105/8844	9.30494958334222e-05	0.000566055874510398	0.000286425317850137	AKT1/MDM2/MAPK8/MAPK1/STAT1/RHOA/SRC/CD209/MAPK14	9
hsa04148	hsa04148	Efferocytosis	11/156	156/8844	9.33495652701358e-05	0.000566055874510398	0.000286425317850137	ARG2/MAP2K1/RAB5A/CASP7/MAPK1/RXRA/CASP3/NR1H3/PTK2/PPARD/MAPK14	11
hsa00071	hsa00071	Fatty acid degradation	6/156	43/8844	9.72460260605716e-05	0.000577398279734644	0.000292164595839875	ADH5/ACAT1/ACADM/ALDH2/GCDH/HADH	6
hsa04066	hsa04066	HIF-1 signaling pathway	9/156	109/8844	0.000124336401095966	0.000723181108415311	0.00036593097637266	AKT1/MAP2K1/INSR/EIF4E/HK1/IGF1R/MAPK1/PDK1/EGFR	9
hsa04210	hsa04210	Apoptosis	10/156	136/8844	0.000138392648815353	0.00078883809824751	0.000399153534477964	AKT1/MAP2K1/XIAP/PARP1/MAPK8/CASP7/MAPK1/CTSO/CASP3/CTSD	10
hsa05145	hsa05145	Toxoplasmosis	9/156	111/8844	0.000143016118665916	0.000799207721956587	0.00040440058322457	AKT1/XIAP/MAPK8/MAPK1/HSPA8/STAT1/CASP3/TGFB2/MAPK14	9
hsa05135	hsa05135	Yersinia infection	10/156	138/8844	0.000156180784689127	0.000855990839161563	0.000433132945392924	AKT1/MAP2K1/CDC42/MAPK8/MAPK1/GSK3B/PTK2/RHOA/SRC/MAPK14	10
hsa04915	hsa04915	Estrogen signaling pathway	10/156	139/8844	0.000165774499124752	0.00087492096760286	0.000442711625342906	AKT1/MAP2K1/MAPK1/GRB2/PRKACA/HSPA8/SRC/EGFR/HSP90AA1/CTSD	10
hsa05162	hsa05162	Measles	10/156	139/8844	0.000165774499124752	0.00087492096760286	0.000442711625342906	AKT1/CSNK2A1/MAPK8/GSK3B/HSPA8/CDK6/STAT1/CASP3/CD209/CDK2	10
hsa05211	hsa05211	Renal cell carcinoma	7/156	70/8844	0.000219321231110072	0.00113648274302492	0.00057506236673837	AKT1/MAP2K1/CDC42/MAPK1/PAK6/GRB2/TGFB2	7
hsa05120	hsa05120	Epithelial cell signaling in Helicobacter pylori infection	7/156	71/8844	0.00023975629826774	0.00119337877107828	0.000603851862004523	CDC42/CSK/MAPK8/CASP3/SRC/EGFR/MAPK14	7
hsa05230	hsa05230	Central carbon metabolism in cancer	7/156	71/8844	0.00023975629826774	0.00119337877107828	0.000603851862004523	AKT1/MAP2K1/HK1/MAPK1/PDK1/FGFR2/EGFR	7
hsa04668	hsa04668	TNF signaling pathway	9/156	119/8844	0.000242863048149264	0.00119337877107828	0.000603851862004523	AKT1/MAP2K1/XIAP/MAPK8/CASP7/MAPK1/CASP3/SELE/MAPK14	9
hsa05165	hsa05165	Human papillomavirus infection	16/156	333/8844	0.000250580423382967	0.00121043085871433	0.000612480249838831	AKT1/MAP2K1/CDC42/MDM2/MAPK1/CCNA2/GRB2/GSK3B/PRKACA/CDK6/RHEB/STAT1/CASP3/PTK2/EGFR/CDK2	16
hsa05218	hsa05218	Melanoma	7/156	73/8844	0.000285229012186428	0.00135483780788553	0.000685550432798959	AKT1/MAP2K1/IGF1R/MDM2/MAPK1/CDK6/EGFR	7
hsa01524	hsa01524	Platinum drug resistance	7/156	75/8844	0.000337390998115387	0.00157633499119484	0.000797628416597205	AKT1/XIAP/GSTT2/MDM2/MAPK1/CASP3/GSTO1	7
hsa03320	hsa03320	PPAR signaling pathway	7/156	76/8844	0.00036619727932124	0.00168332620333151	0.000851766167521391	FABP5/ACADM/RXRA/PPARA/NR1H3/PPARD/FABP3	7
hsa04218	hsa04218	Cellular senescence	10/156	157/8844	0.00044429418651083	0.0020099022723109	0.0010170142615202	AKT1/MAP2K1/MDM2/MAPK1/CCNA2/CDK6/RHEB/TGFB2/CDK2/MAPK14	10
hsa04150	hsa04150	mTOR signaling pathway	10/156	158/8844	0.000467240907473355	0.00205626931622421	0.00104047607136738	AKT1/MAP2K1/INSR/EIF4E/IGF1R/MAPK1/GRB2/GSK3B/RHEB/RHOA	10
hsa04926	hsa04926	Relaxin signaling pathway	9/156	130/8844	0.000468973703700259	0.00205626931622421	0.00104047607136738	AKT1/MAP2K1/MAPK8/MAPK1/GRB2/PRKACA/SRC/EGFR/MAPK14	9
hsa05166	hsa05166	Human T-cell leukemia virus 1 infection	12/156	223/8844	0.000564657110053171	0.00243829206613869	0.00123378028831395	AKT1/MAP2K1/MMP7/XIAP/KAT2B/FDPS/MAPK8/MAPK1/CCNA2/PRKACA/TGFB2/CDK2	12
hsa04062	hsa04062	Chemokine signaling pathway	11/156	193/8844	0.00059554097383565	0.00253327130661433	0.00128183995939488	AKT1/MAP2K1/CDC42/MAPK1/GRB2/GSK3B/PRKACA/STAT1/PTK2/RHOA/SRC	11
hsa00900	hsa00900	Terpenoid backbone biosynthesis	4/156	23/8844	0.000635007951516555	0.00266143038503262	0.00134668868974873	HMGCR/ACAT1/FDPS/FNTA	4
hsa04931	hsa04931	Insulin resistance	8/156	109/8844	0.000659448955242944	0.00272381090209042	0.00137825334657946	AKT1/INSR/MAPK8/GSK3B/PTPN1/PPARA/PYGL/NR1H3	8
hsa05219	hsa05219	Bladder cancer	5/156	41/8844	0.000718799029857813	0.00290794659010996	0.00147142634476478	MAP2K1/MDM2/MAPK1/SRC/EGFR	5
hsa01232	hsa01232	Nucleotide metabolism	7/156	85/8844	0.000724435817185289	0.00290794659010996	0.00147142634476478	APRT/ADK/IMPDH2/IMPDH1/GMPR2/PNP/DTYMK	7
hsa00310	hsa00310	Lysine degradation	6/156	63/8844	0.000811064355049113	0.00321046307206941	0.00162450024330012	SETD7/ACAT1/DOT1L/ALDH2/GCDH/HADH	6
hsa05415	hsa05415	Diabetic cardiomyopathy	11/156	205/8844	0.000981819608775622	0.0037839925221708	0.00191470720420092	AKT1/INSR/PARP1/MAPK8/GSR/GSK3B/PPARA/TGFB2/PDK2/CTSD/MAPK14	11
hsa04936	hsa04936	Alcoholic liver disease	9/156	144/8844	0.000982510339089961	0.0037839925221708	0.00191470720420092	AKT1/ADH5/ACADM/MAPK8/GSK3B/ALDH2/PPARA/CASP3/MAPK14	9
hsa05235	hsa05235	PD-L1 expression and PD-1 checkpoint pathway in cancer	7/156	90/8844	0.00101906315639459	0.00387243999429943	0.00195946178843591	AKT1/MAP2K1/CSNK2A1/MAPK1/STAT1/EGFR/MAPK14	7
hsa05221	hsa05221	Acute myeloid leukemia	6/156	68/8844	0.00121549685001591	0.00455811318755967	0.0023064136904734	AKT1/MAP2K1/MAPK1/CCNA2/GRB2/PPARD	6
hsa04664	hsa04664	Fc epsilon RI signaling pathway	6/156	69/8844	0.0013121808379147	0.00485677323124271	0.00245753622411912	AKT1/MAP2K1/MAPK8/MAPK1/GRB2/MAPK14	6
hsa04930	hsa04930	Type II diabetes mellitus	5/156	47/8844	0.00135156494770073	0.00493841038582958	0.00249884477510121	INSR/HK1/MAPK8/MAPK1/PKLR	5
hsa05131	hsa05131	Shigellosis	12/156	249/8844	0.00147813477497725	0.0052994208759859	0.00268151674980635	AKT1/CDC42/HK1/MDM2/MAPK8/MAPK1/GSK3B/PTK2/RHOA/SRC/EGFR/MAPK14	12
hsa00280	hsa00280	Valine, leucine and isoleucine degradation	5/156	48/8844	0.00148755673711885	0.0052994208759859	0.00268151674980635	BCAT2/ACAT1/ACADM/ALDH2/HADH	5
hsa04611	hsa04611	Platelet activation	8/156	125/8844	0.00161103118147697	0.0056684430459375	0.00286824264928324	AKT1/MAPK1/PRKACA/GP1BA/RHOA/SRC/FGG/MAPK14	8
hsa05231	hsa05231	Choline metabolism in cancer	7/156	99/8844	0.00177985678140041	0.00614435052403852	0.0031090527120712	AKT1/MAP2K1/MAPK8/MAPK1/GRB2/RHEB/EGFR	7
hsa00330	hsa00330	Arginine and proline metabolism	5/156	50/8844	0.00178940734559718	0.00614435052403852	0.0031090527120712	ARG2/AMD1/ALDH2/SRM/OAT	5
hsa04913	hsa04913	Ovarian steroidogenesis	5/156	51/8844	0.00195610662835698	0.00663679034621117	0.00335822817149005	INSR/IGF1R/PRKACA/AKR1C3/HSD17B1	5
hsa01230	hsa01230	Biosynthesis of amino acids	6/156	75/8844	0.00202140619740951	0.0067776560736672	0.00342950648972264	ARG2/BCAT2/CBS/TPI1/SDS/PKLR	6
hsa04613	hsa04613	Neutrophil extracellular trap formation	10/156	192/8844	0.00207594122209066	0.00687957265460277	0.00348107646788764	AKT1/MAP2K1/MAPK1/GP1BA/PADI4/SRC/SELP/FGG/CTSG/MAPK14	10
hsa05146	hsa05146	Amoebiasis	7/156	103/8844	0.0022342984521424	0.00731925355012167	0.00370355581298862	ARG2/RAB5A/PRKACA/CASP3/TGFB2/PTK2/CTSG	7
hsa04215	hsa04215	Apoptosis - multiple species	4/156	32/8844	0.0022798703445234	0.00738367100214966	0.00373615116267591	XIAP/MAPK8/CASP7/CASP3	4
hsa05167	hsa05167	Kaposi sarcoma-associated herpesvirus infection	10/156	196/8844	0.00241490348673143	0.00773311790694897	0.00391297194183568	AKT1/MAP2K1/MAPK8/MAPK1/GSK3B/CDK6/STAT1/CASP3/SRC/MAPK14	10
hsa05133	hsa05133	Pertussis	6/156	78/8844	0.00246945216425279	0.00781993185346717	0.00395689995909511	MAPK8/CASP7/MAPK1/CASP3/RHOA/MAPK14	6
hsa00983	hsa00983	Drug metabolism - other enzymes	6/156	81/8844	0.00298841139356324	0.00935931040841233	0.00473582835070172	GSTT2/UMPS/CES2/IMPDH2/IMPDH1/GSTO1	6
hsa04380	hsa04380	Osteoclast differentiation	8/156	142/8844	0.0035746620740096	0.0110736814249211	0.00560330325102192	AKT1/MAP2K1/MAPK8/MAPK1/GRB2/STAT1/TGFB2/MAPK14	8
hsa04550	hsa04550	Signaling pathways regulating pluripotency of stem cells	8/156	144/8844	0.00389277062571682	0.0119294583691322	0.00603632796517492	AKT1/MAP2K1/IGF1R/MAPK1/GRB2/GSK3B/FGFR2/MAPK14	8
hsa04928	hsa04928	Parathyroid hormone synthesis, secretion and action	7/156	115/8844	0.00414702355638865	0.0125734224847954	0.00636217499692324	MAP2K1/PDE4B/MAPK1/RXRA/PRKACA/RHOA/EGFR	7
hsa01200	hsa01200	Carbon metabolism	7/156	116/8844	0.0043495030041486	0.0130485090124458	0.00660256965726713	ADH5/HK1/ACAT1/ME2/TPI1/SDS/PKLR	7
hsa05224	hsa05224	Breast cancer	8/156	148/8844	0.00459437230170165	0.013560756603986	0.00686176788456539	AKT1/MAP2K1/IGF1R/MAPK1/GRB2/GSK3B/CDK6/EGFR	8
hsa04213	hsa04213	Longevity regulating pathway - multiple species	5/156	62/8844	0.00461541540556716	0.013560756603986	0.00686176788456539	AKT1/INSR/IGF1R/PRKACA/HSPA8	5
hsa04072	hsa04072	Phospholipase D signaling pathway	8/156	149/8844	0.00478408381221353	0.0138018647001025	0.00698376902646001	AKT1/MAP2K1/INSR/MAPK1/GRB2/RHEB/RHOA/EGFR	8
hsa05132	hsa05132	Salmonella infection	11/156	251/8844	0.00479433194845667	0.0138018647001025	0.00698376902646001	AKT1/MAP2K1/CDC42/RAB5A/MAPK8/CASP7/MAPK1/CASP3/RHOA/HSP90AA1/MAPK14	11
hsa00670	hsa00670	One carbon pool by folate	3/156	20/8844	0.00492324779660929	0.0140312562203365	0.00709984155932077	ATIC/GART/MTHFD1	3
hsa04211	hsa04211	Longevity regulating pathway	6/156	90/8844	0.00503793958828607	0.0142159681451636	0.0071933061343949	AKT1/INSR/EIF4E/IGF1R/PRKACA/RHEB	6
hsa04360	hsa04360	Axon guidance	9/156	184/8844	0.00520480351253767	0.0145428333438553	0.00735870052856203	CDC42/ABL1/MAPK1/PAK6/GSK3B/PTK2/RHOA/SRC/EPHB4	9
hsa04540	hsa04540	Gap junction	6/156	92/8844	0.00560674317762232	0.0155138039380812	0.00785001344235317	MAP2K1/MAPK1/GRB2/PRKACA/SRC/EGFR	6
hsa00770	hsa00770	Pantothenate and CoA biosynthesis	3/156	21/8844	0.0056702653479902	0.0155387079247808	0.00786261490561395	BCAT2/PPCDC/ALDH2	3
hsa04071	hsa04071	Sphingolipid signaling pathway	7/156	122/8844	0.00572568519038087	0.0155411455167481	0.00786384833165091	AKT1/MAP2K1/MAPK8/MAPK1/RHOA/CTSD/MAPK14	7
hsa00380	hsa00380	Tryptophan metabolism	4/156	42/8844	0.00619305545335185	0.0166511396623139	0.00842550741915793	ACAT1/ALDH2/GCDH/HADH	4
hsa00010	hsa00010	Glycolysis / Gluconeogenesis	5/156	67/8844	0.00642151717543299	0.0171040410747514	0.00865467637023433	ADH5/HK1/ALDH2/TPI1/PKLR	5
hsa04657	hsa04657	IL-17 signaling pathway	6/156	95/8844	0.00654615904630085	0.0172745863721828	0.00874097260568438	MAPK8/MAPK1/GSK3B/CASP3/HSP90AA1/MAPK14	6
hsa04110	hsa04110	Cell cycle	8/156	158/8844	0.00677445944500598	0.0177130361635477	0.00896282900980994	CDK7/ABL1/MDM2/CCNA2/GSK3B/CDK6/TGFB2/CDK2	8
hsa04810	hsa04810	Regulation of actin cytoskeleton	10/156	230/8844	0.00745045066751472	0.0193034403658336	0.00976757647320111	AKT1/MAP2K1/CDC42/MAPK1/PAK6/FGFR2/PTK2/RHOA/SRC/EGFR	10
hsa05206	hsa05206	MicroRNAs in cancer	12/156	312/8844	0.00904974446309789	0.0232358303782243	0.0117573730815022	ST14/MAP2K1/ABL1/MDM2/MAPK1/GRB2/CDK6/CASP3/TGFB2/RHOA/EGFR/PLAU	12
hsa05130	hsa05130	Pathogenic Escherichia coli infection	9/156	203/8844	0.00969255370008783	0.0244458212789826	0.0123696307118028	CDC42/ABL1/MAPK8/CASP7/MAPK1/CASP3/RHOA/SRC/MAPK14	9
hsa05169	hsa05169	Epstein-Barr virus infection	9/156	203/8844	0.00969255370008783	0.0244458212789826	0.0123696307118028	AKT1/MDM2/MAPK8/CCNA2/CDK6/STAT1/CASP3/CDK2/MAPK14	9
hsa04140	hsa04140	Autophagy - animal	8/156	169/8844	0.00999408066111644	0.0249852016527911	0.0126425581770356	AKT1/MAP2K1/IGF1R/MAPK8/MAPK1/PRKACA/RHEB/CTSD	8
hsa05164	hsa05164	Influenza A	8/156	172/8844	0.0110425304449288	0.0273662711026497	0.0138473837158375	AKT1/MAP2K1/RAB11A/FDPS/MAPK1/CDK6/STAT1/CASP3	8
hsa04114	hsa04114	Oocyte meiosis	7/156	139/8844	0.0113941720529885	0.0278516571974415	0.0140929899761754	MAP2K1/IGF1R/MAPK1/PRKACA/CDK2/MAPK14/AR	7
hsa00520	hsa00520	Amino sugar and nucleotide sugar metabolism	4/156	50/8844	0.011433838217897	0.0278516571974415	0.0140929899761754	HK1/HEXB/GNPDA1/GALE	4
hsa04659	hsa04659	Th17 cell differentiation	6/156	108/8844	0.0119694135091201	0.0288244362307855	0.0145852179635	MAPK8/MAPK1/RXRA/STAT1/HSP90AA1/MAPK14	6
hsa05100	hsa05100	Bacterial invasion of epithelial cells	5/156	78/8844	0.0120354663560122	0.0288244362307855	0.0145852179635	CDC42/CTNNA1/PTK2/RHOA/SRC	5
hsa04620	hsa04620	Toll-like receptor signaling pathway	6/156	109/8844	0.0124873486076454	0.0296574529431578	0.0150067259583107	AKT1/MAP2K1/MAPK8/MAPK1/STAT1/MAPK14	6
hsa00980	hsa00980	Metabolism of xenobiotics by cytochrome P450	5/156	79/8844	0.0126706848311249	0.0298441750154595	0.0151012076717191	ADH5/GSTT2/CBR1/CYP2C9/GSTO1	5
hsa04144	hsa04144	Endocytosis	10/156	252/8844	0.0136226132006728	0.0318233177228832	0.016102657536602	RAB11A/CDC42/IGF1R/RAB5A/MDM2/HSPA8/FGFR2/RHOA/SRC/EGFR	10
hsa05134	hsa05134	Legionellosis	4/156	56/8844	0.0168174202817855	0.0389671933358445	0.0197174717895132	CASP7/HSPA8/CLK1/CASP3	4
hsa04024	hsa04024	cAMP signaling pathway	9/156	226/8844	0.0184717610553036	0.0424552572642059	0.0214824385787487	AKT1/MAP2K1/PDE4B/MAPK8/MAPK1/PRKACA/PPARA/RHOA/PDE3B	9
hsa00480	hsa00480	Glutathione metabolism	4/156	58/8844	0.0189105995998537	0.0431161670876664	0.0218168601699365	GSTT2/GSR/SRM/GSTO1	4
hsa04934	hsa04934	Cushing syndrome	7/156	155/8844	0.019698390379467	0.0445558830011753	0.0225453590809271	MAP2K1/MAPK1/GSK3B/PRKACA/CDK6/EGFR/CDK2	7
hsa04923	hsa04923	Regulation of lipolysis in adipocytes	4/156	59/8844	0.0200150372626036	0.0449156348019058	0.0227273941564583	AKT1/INSR/PRKACA/PDE3B	4
hsa04152	hsa04152	AMPK signaling pathway	6/156	122/8844	0.0207179616084011	0.045930156724978	0.0232407441230729	AKT1/HMGCR/INSR/IGF1R/CCNA2/RHEB	6
hsa05202	hsa05202	Transcriptional misregulation in cancer	8/156	193/8844	0.0207894393597269	0.045930156724978	0.0232407441230729	DOT1L/IGF1R/MDM2/CCNA2/RXRA/CCNT1/PTK2/PLAU	8
hsa00051	hsa00051	Fructose and mannose metabolism	3/156	34/8844	0.0215997044862524	0.0473531982967842	0.0239608057863691	SORD/HK1/TPI1	3
hsa04662	hsa04662	B cell receptor signaling pathway	5/156	91/8844	0.0221259527801715	0.0478742866413213	0.0242244774510102	AKT1/MAP2K1/MAPK1/GRB2/GSK3B	5
hsa04217	hsa04217	Necroptosis	7/156	159/8844	0.0223032234012459	0.0478742866413213	0.0242244774510102	XIAP/PPIA/PARP1/MAPK8/STAT1/PYGL/HSP90AA1	7
hsa00590	hsa00590	Arachidonic acid metabolism	4/156	61/8844	0.0223413337659499	0.0478742866413213	0.0242244774510102	EPHX2/CBR1/CYP2C9/AKR1C3	4
hsa00350	hsa00350	Tyrosine metabolism	3/156	36/8844	0.0251249992590828	0.0534374984241686	0.0270394728868369	MIF/ADH5/GSTZ1	3
hsa05216	hsa05216	Thyroid cancer	3/156	37/8844	0.0269967951348836	0.0569932341736432	0.0288386817425268	MAP2K1/MAPK1/RXRA	3
hsa00603	hsa00603	Glycosphingolipid biosynthesis - globo and isoglobo series	2/156	16/8844	0.031552094339625	0.0661201976970083	0.0334569421403145	HEXB/ABO	2
hsa04310	hsa04310	Wnt signaling pathway	7/156	174/8844	0.0341865319353989	0.0711179678948079	0.0359858230898936	MMP7/CSNK2A1/MAPK8/GSK3B/PRKACA/PPARD/RHOA	7
hsa05170	hsa05170	Human immunodeficiency virus 1 infection	8/156	213/8844	0.0346786199692796	0.0713505093196335	0.0361034894802947	AKT1/MAP2K1/MAPK8/MAPK1/PAK6/CASP3/PTK2/MAPK14	8
hsa04920	hsa04920	Adipocytokine signaling pathway	4/156	70/8844	0.0347990203348388	0.0713505093196335	0.0361034894802947	AKT1/MAPK8/RXRA/PPARA	4
hsa05142	hsa05142	Chagas disease	5/156	103/8844	0.0352806980850874	0.071821421101785	0.0363417717117065	AKT1/MAPK8/MAPK1/TGFB2/MAPK14	5
hsa05204	hsa05204	Chemical carcinogenesis - DNA adducts	4/156	71/8844	0.036387891116254	0.0735499926817899	0.0372164321233803	GSTT2/CBR1/CYP2C9/GSTO1	4
hsa00982	hsa00982	Drug metabolism - cytochrome P450	4/156	73/8844	0.0396897438230843	0.0796589928843593	0.0403075975075059	ADH5/GSTT2/CYP2C9/GSTO1	4
hsa04922	hsa04922	Glucagon signaling pathway	5/156	107/8844	0.0405469303802156	0.0808103157927374	0.0408901690253187	AKT1/PRKACA/PPARA/PYGL/PDE3B	5
hsa04962	hsa04962	Vasopressin-regulated water reabsorption	3/156	44/8844	0.0421149242675915	0.0833524542796082	0.0421764957942985	RAB11A/RAB5A/PRKACA	3
hsa04115	hsa04115	p53 signaling pathway	4/156	75/8844	0.0431572984396928	0.0848264141745687	0.0429223222231428	MDM2/CDK6/CASP3/CDK2	4
hsa05140	hsa05140	Leishmaniasis	4/156	77/8844	0.0467905322559814	0.0912577387581094	0.0461765843392834	MAPK1/STAT1/TGFB2/MAPK14	4
hsa00860	hsa00860	Porphyrin metabolism	3/156	46/8844	0.0470697810436564	0.0912577387581094	0.0461765843392834	BLVRB/FECH/ALAD	3
hsa04621	hsa04621	NOD-like receptor signaling pathway	7/156	189/8844	0.0496908312739009	0.095688425088255	0.0484185198045833	XIAP/MAPK8/MAPK1/STAT1/RHOA/HSP90AA1/MAPK14	7
