# Supplementary figures and images for: Genes Associated with Bicalutamide and Zoladex Effects in Benign Prostatic Hyperplasia via Transcriptomic and Network Pharmacology Analyses
Source: Research Square preprint supplement (doi:10.21203/rs.3.rs-6957357/v1), 2025-07-14

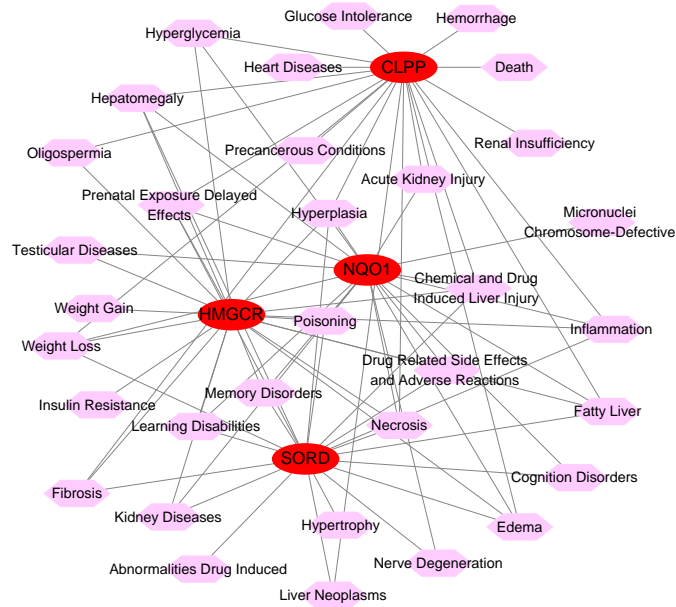

Supplement: Supplementary file 1 [file 69a673e5c82722370c15c18a.pdf]

RF

SVM\_RFE

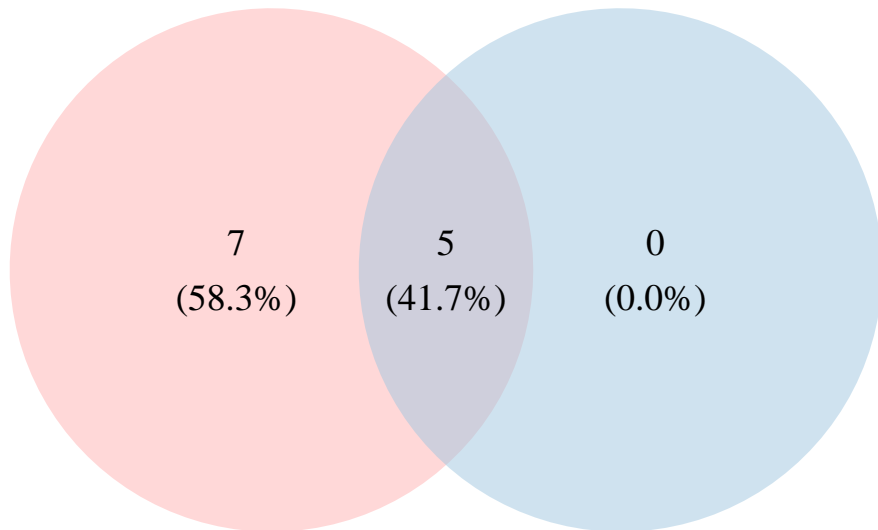

Supplement: Supplementary file 2 [file b0e249ebef84a752eaf9e8a6.pdf]

DEGs

Drug

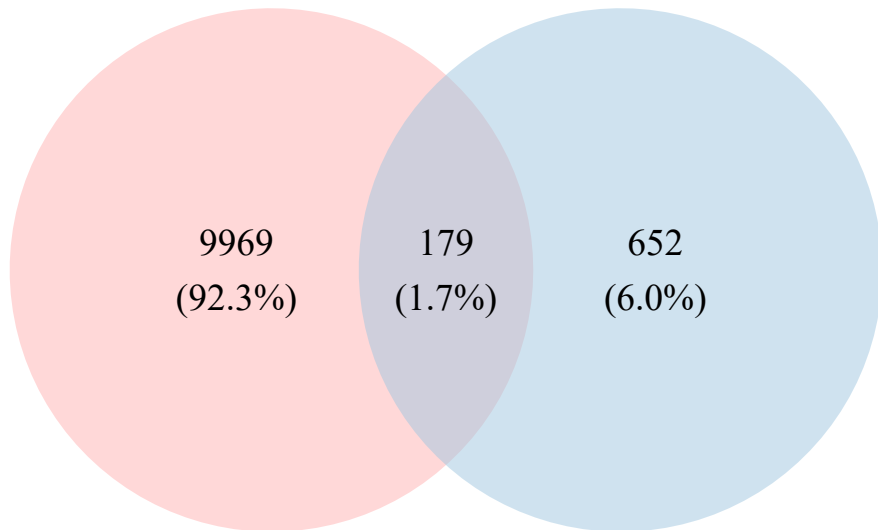

Supplement: Supplementary file 4 [file b93ef20e176af2bba465eaf1.pdf]
